# Supplementary material for: Chiral Phosphine Catalyzed Allylic Alkylation of Benzylidene Succinimides with Morita–Baylis–Hillman Carbonates
Source: MDPI journal article supplement (doi:10.3390/molecules28062825), 2023-03-21
Supplement: s1 [file s1]

## Supporting Materials

# Chiral phosphine catalyzed allylic alkylation of benzylidene succinimides with Morita-Baylis-Hillman carbonates

Chang Liu <sup>1,2</sup>, Jianwei Sun <sup>2,\*</sup> and Pengfei Li <sup>1,3,\*</sup>

<sup>1</sup>Shenzhen Grubbs Institute, Department of Chemistry, Guangdong Provincial Key Laboratory of Catalysis, College of Science, Southern University of Science and Technology (SUSTech), Shenzhen 518055, China

<sup>2</sup>Department of Chemistry, The Hong Kong University of Science and Technology, Clear Water Bay, Kowloon, Hong Kong SAR, China

<sup>3</sup>Southern University of Science and Technology Guangming Advanced Research Institute

\*Correspondence: [sunjw@ust.hk](mailto:sunjw@ust.hk); [lipf@sustech.edu.cn](mailto:lipf@sustech.edu.cn)

|                                                          |     |
|----------------------------------------------------------|-----|
| I. General Information.....                              | S2  |
| II. Substrate Preparation.....                           | S3  |
| III. Chiral phosphine catalyzed allylic alkylations..... | S10 |
| IV. Scale-up of the allylic alkylation.....              | S22 |
| V. Determination of the Stereochemistry.....             | S23 |
| VI. Copies of NMR of substrates and products.....        | S26 |
| VII. Copies of Chiral HPLC analysis.....                 | S81 |



## I. General Information

All chemicals were used without further purification as commercially available unless otherwise noted. Thin-layer chromatography (TLC) was performed on silica gel plates (60F-254) using UV-light (254 and 365 nm). Flash chromatography was conducted on silica gel (300 400 mesh). NMR (400, 500 or 600 MHz for  $^1\text{H}$  NMR, 100 or 126 MHz for  $^{13}\text{C}$  NMR, 376 MHz for  $^{19}\text{F}$  NMR) spectra were recorded in  $\text{CDCl}_3$  with TMS as the internal standard. Chemical shifts are reported in ppm and coupling constants are given in Hz. Data for  $^1\text{H}$  NMR are recorded as follows: chemical shift (ppm), multiplicity (s, singlet; d, doublet; t, triplet; q, quartet; m, multiplet; dd, doublet-doublet), coupling constant (Hz), integration. Data for  $^{13}\text{C}$  NMR are reported in terms of chemical shift ( $\delta$ , ppm). Data for  $^{19}\text{F}$  NMR are reported in terms of chemical shift ( $\delta$ , ppm). High resolution mass spectral (HRMS) analyses were recorded on a Thermo Scientific Q Exactive Orbitrap mass spectrometer (Bremen, Germany) with ESI source. The crystal structure and data were recorded on a Rigaku Homelab diffractometer.



## II. Substrate Preparation

### Synthesis of $\alpha$ -benzylidene succinimides **1**.

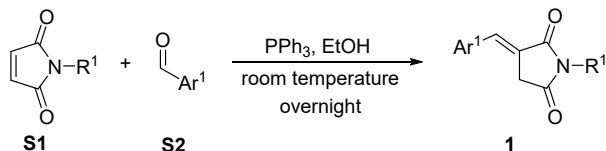

The procedure was according to the reported literature.<sup>1</sup> To a solution of pyrrole-2,5-dione **S1** (1.73 g, 10mmol, 1.0 equiv.) and aldehyde **S2** (11 mmol, 1.1 equiv.) in EtOH (100 mL), was added triphenylphosphine (PPh<sub>3</sub>, 2.75 g, 10.5 mmol, 1.05 equiv.) at room temperature. The reaction mixture was stirred at room temperature overnight. When the reaction was completed (monitored by TLC), the reaction mixture was filtered, the precipitation was washed with ethanol and dried to afford **1**.

#### (*E*)-3-benzylidene-1-phenylpyrrolidine-2,5-dione (**1a**)

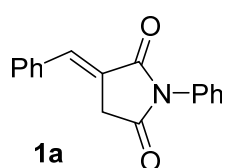

white solid, 95% yield, 2.50g, mp:192.2 – 193.7°C. <sup>1</sup>H NMR (400 MHz, CDCl<sub>3</sub>):  $\delta$  7.75 (t,  $J$  = 2.4 Hz, 1H), 7.57 – 7.36 (m, 10H), 3.77 (d,  $J$  = 2.4 Hz, 2H). <sup>13</sup>C NMR (101 MHz, CDCl<sub>3</sub>):  $\delta$  173.2, 170.2, 135.6, 134.2, 132.1, 130.5, 130.4, 129.3, 129.3, 128.7, 126.6, 123.1, 34.4. HRMS (CI<sup>+</sup>) Calcd for C<sub>17</sub>H<sub>14</sub>NO<sub>2</sub><sup>+</sup> [M + H]<sup>+</sup>: 264.1025, Found: 264.1016.

#### (*E*)-3-benzylidene-1-methylpyrrolidine-2,5-dione (**1b**)

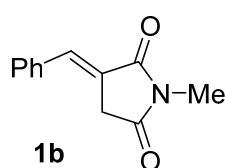

white solid, 87% yield, 1.75g, mp:161.8 – 165.1°C. <sup>1</sup>H NMR (500 MHz, CDCl<sub>3</sub>):  $\delta$  7.62 (t,  $J$  = 2.4 Hz, 1H), 7.51 – 7.40 (m, 5H), 3.57 (d,  $J$  = 2.4 Hz, 2H), 3.12 (s, 3H). <sup>13</sup>C NMR (126 MHz, CDCl<sub>3</sub>):  $\delta$  174.3, 171.3, 134.4, 134.2, 130.3, 130.3, 129.3, 123.6, 34.2, 25.1. HRMS (CI<sup>+</sup>) Calcd for C<sub>12</sub>H<sub>12</sub>NO<sub>2</sub><sup>+</sup> [M + H]<sup>+</sup>: 202.0868, Found: 202.0862.

#### (*E*)-1-benzyl-3-benzylidenepyrrolidine-2,5-dione (**1c**)

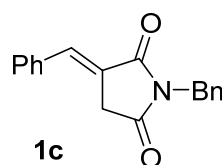

white solid, 93% yield, 2.57g, mp:186.5 – 188.8°C. <sup>1</sup>H NMR (500 MHz, CDCl<sub>3</sub>):  $\delta$  7.62 (t,  $J$  = 2.4 Hz, 1H), 7.48 – 7.40 (m, 7H), 7.35 – 7.26 (m, 3H), 4.79 (s, 2H), 3.57 (d,  $J$  = 2.4 Hz, 2H).

<sup>1</sup> L. Yan, W. Yang, L. Li, Y. Sheng, Z. Jiang, *Chin. J. Chem.* **2011**, 29, 1906-1910.



**<sup>13</sup>C NMR** (126 MHz, CDCl<sub>3</sub>): δ 173.8, 170.8, 136.0, 134.7, 134.2, 130.3, 130.3, 129.2, 129.0, 128.8, 128.1, 123.5, 42.6, 34.2. **HRMS** (CI<sup>+</sup>) Calcd for C<sub>18</sub>H<sub>16</sub>NO<sub>2</sub><sup>+</sup> [M + H]<sup>+</sup>: 278.1181, Found: 278.1174.

**(E)-3-benzylidene-1-butylpyrrolidine-2,5-dione (1d)**

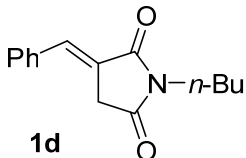 white solid, 96% yield, 2.33g, mp:115.6 – 117.7°C. **<sup>1</sup>H NMR** (500 MHz, CDCl<sub>3</sub>): δ 7.60 (s, 1H), 7.49 – 7.41 (m, 5H), 3.63 (t, *J* = 7.4 Hz, 2H), 3.56 (s, 2H), 1.61 (p, *J* = 7.4 Hz, 2H), 1.35 (h, *J* = 7.4 Hz, 2H), 0.94 (t, *J* = 7.4 Hz, 3H). **<sup>13</sup>C NMR** (126 MHz, CDCl<sub>3</sub>): δ 174.2, 171.2, 134.3, 134.2, 130.2, 130.2, 129.2, 123.7, 38.9, 34.2, 30.0, 20.3, 13.8. **HRMS** (CI<sup>+</sup>) Calcd for C<sub>15</sub>H<sub>18</sub>NO<sub>2</sub><sup>+</sup> [M + H]<sup>+</sup>: 244.1338, Found: 244.1330.

**(E)-3-benzylidene-1-(tert-butyl)pyrrolidine-2,5-dione (1e)**

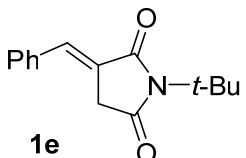 white solid, 96% yield, 2.33g, mp:119.2 – 120.9°C. **<sup>1</sup>H NMR** (500 MHz, CDCl<sub>3</sub>): δ 7.51 (t, *J* = 2.5 Hz, 1H), 7.49 – 7.35 (m, 5H), 3.47 (d, *J* = 2.5 Hz, 2H), 1.65 (s, 9H). **<sup>13</sup>C NMR** (126 MHz, CDCl<sub>3</sub>): δ 175.2, 172.3, 134.5, 133.0, 130.1, 129.9, 129.1, 124.2, 58.8, 34.9, 28.7. **HRMS** (CI<sup>+</sup>) Calcd for C<sub>15</sub>H<sub>18</sub>NO<sub>2</sub><sup>+</sup> [M + H]<sup>+</sup>: 244.1338, Found: 244.1330.

**(E)-3-benzylidene-1-(naphthalen-1-ylmethyl)pyrrolidine-2,5-dione (1f)**

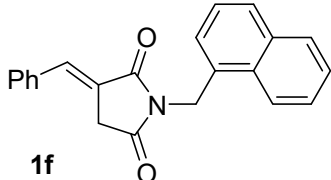 white solid, 92% yield, 2.98g, mp:190.1 – 193.3°C. **<sup>1</sup>H NMR** (500 MHz, CDCl<sub>3</sub>): δ 8.37 (d, *J* = 8.5 Hz, 1H), 7.83 (dd, *J* = 26.0, 8.2 Hz, 2H), 7.67 – 7.56 (m, 3H), 7.53 – 7.40 (m, 7H), 5.28 (s, 2H), 3.60 (d, *J* = 2.4 Hz, 2H). **<sup>13</sup>C NMR** (126 MHz, CDCl<sub>3</sub>): δ 174.0, 171.0, 134.9, 134.2, 133.9, 131.4, 130.9, 130.4, 130.3, 129.2, 128.9, 128.8, 128.0, 126.7, 126.0, 125.4, 123.8, 123.4, 40.5, 34.3. **HRMS** (CI<sup>+</sup>) Calcd for C<sub>22</sub>H<sub>18</sub>NO<sub>2</sub><sup>+</sup> [M + H]<sup>+</sup>: 328.1338, Found: 328.1328.

**(E)-1-benzyl-3-(4-methylbenzylidene)pyrrolidine-2,5-dione (1g)**

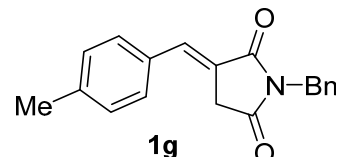 white solid, 86% yield, 2.50g, mp:164.0 – 165.8°C. **<sup>1</sup>H NMR** (400 MHz, CDCl<sub>3</sub>): δ 7.62 (t, *J* = 2.4 Hz, 1H), 7.46 (d, *J* = 7.0 Hz, 2H), 7.39 (d, *J* = 7.8 Hz, 2H), 7.37 – 7.24 (m, 5H), 4.81 (s, 2H), 3.57 (d, *J* = 2.4 Hz, 2H), 2.41 (s, 3H). **<sup>13</sup>C NMR** (101 MHz, CDCl<sub>3</sub>): δ 173.2, 170.2, 135.6, 134.2, 132.1, 130.5, 130.4, 129.3, 129.3, 128.7, 126.6,



123.1, 34.4. **HRMS** (CI<sup>+</sup>) Calcd for C<sub>19</sub>H<sub>18</sub>NO<sub>2</sub><sup>+</sup> [M + H]<sup>+</sup>: 292.1338, Found: 292.1328.

**(E)-1-benzyl-3-(4-(methylthio)benzylidene)pyrrolidine-2,5-dione (1h)**

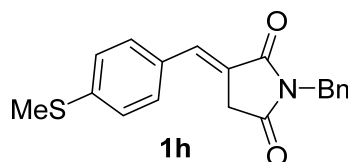

white solid, 92% yield, 2.97g, mp:177.2 – 180.5°C. <sup>1</sup>H

**NMR** (500 MHz, CDCl<sub>3</sub>): δ 7.55 (t, *J* = 2.4 Hz, 1H), 7.42 (d, *J* = 6.7 Hz, 2H), 7.37 (d, *J* = 8.4 Hz, 2H), 7.32 –

7.24 (m, 5H), 4.77 (s, 2H), 3.53 (d, *J* = 2.3 Hz, 2H), 2.50 (s, 3H). <sup>13</sup>C **NMR** (126 MHz, CDCl<sub>3</sub>): 173.8, 170.9, 142.5, 136.0, 134.2, 130.6, 130.5, 129.0, 128.8, 128.1, 126.0, 122.3, 42.6, 34.3, 15.1. **HRMS** (CI<sup>+</sup>) Calcd for C<sub>19</sub>H<sub>18</sub>NO<sub>2</sub>S<sup>+</sup> [M + H]<sup>+</sup>: 324.1058, Found: 324.1049.

**(E)-1-benzyl-3-(4-(methoxy)benzylidene)pyrrolidine-2,5-dione (1i)**

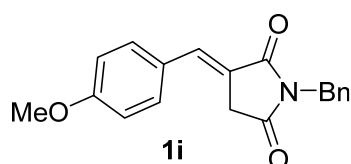

white solid, 90% yield, 2.91g, mp:170.4 – 172.5°C. <sup>1</sup>H

**NMR** (500 MHz, CDCl<sub>3</sub>): δ 7.57 (t, *J* = 2.3 Hz, 1H), 7.46 – 7.40 (m, 4H), 7.34 – 7.25 (m, 3H), 6.97 – 6.93

(m, 2H), 4.78 (s, 2H), 3.85 (s, 3H), 3.53 (d, *J* = 2.3 Hz, 2H). <sup>13</sup>C **NMR** (126 MHz, CDCl<sub>3</sub>): δ 174.0, 171.1, 161.3, 136.1, 134.4, 132.1, 129.0, 128.8, 128.0, 126.9, 120.7, 114.7, 55.5, 42.5, 34.3. **HRMS** (CI<sup>+</sup>) Calcd for C<sub>19</sub>H<sub>18</sub>NO<sub>3</sub><sup>+</sup> [M + H]<sup>+</sup>: 308.1287, Found: 308.1277.

**(E)-1-benzyl-3-(3,5-dimethoxybenzylidene)pyrrolidine-2,5-dione (1j)**

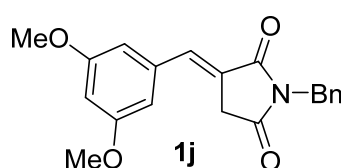

white solid, 95% yield, 3.20g, mp:134.7– 136.2°C. <sup>1</sup>H

**NMR** (500 MHz, CDCl<sub>3</sub>): δ 7.53 (t, *J* = 2.4 Hz, 1H), 7.47 – 7.39 (m, 2H), 7.33 – 7.28 (m, 3H), 6.59 (d, *J* =

2.2 Hz, 2H), 6.51 (t, *J* = 2.3 Hz, 1H), 4.78 (s, 2H), 3.81 (s, 6H), 3.57 (d, *J* = 2.4 Hz, 2H). <sup>13</sup>C **NMR** (126 MHz, CDCl<sub>3</sub>): δ 173.8, 170.8, 161.2, 135.9, 135.9, 134.8, 129.0, 128.8, 128.1, 124.0, 108.3, 102.3, 55.6, 42.6, 34.2. **HRMS** (CI<sup>+</sup>) Calcd for C<sub>20</sub>H<sub>20</sub>NO<sub>4</sub><sup>+</sup> [M + H]<sup>+</sup>: 338.1392, Found: 338.1381.

**(E)-1-benzyl-3-(2-methoxybenzylidene)pyrrolidine-2,5-dione (1k)**

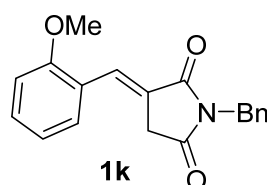

white solid, 90% yield, 2.91g, mp:151.9 – 154.0°C. <sup>1</sup>H **NMR**

(400 MHz, CDCl<sub>3</sub>): δ 8.04 (t, *J* = 2.4 Hz, 1H), 7.50 – 7.42 (m,



2H), 7.40 – 7.26 (m, 5H), 7.04 – 6.97 (m, 1H), 6.94 (d,  $J = 8.2$  Hz, 1H), 4.79 (s, 2H), 3.88 (s, 3H), 3.51 (d,  $J = 2.4$  Hz, 2H).  $^{13}\text{C}$  NMR (101 MHz,  $\text{CDCl}_3$ ):  $\delta$  174.2, 170.9, 158.6, 136.1, 131.8, 129.8, 129.3, 129.0, 128.7, 128.0, 123.3, 123.2, 120.7, 111.3, 55.7, 42.5, 34.3. HRMS (CI+) Calcd for  $\text{C}_{19}\text{H}_{18}\text{NO}_3^+$   $[\text{M} + \text{H}]^+$ : 308.1287, Found: 308.1277.

**(E)-1-benzyl-3-(4-fluorobenzylidene)pyrrolidine-2,5-dione (1l)**

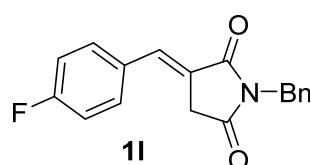

**1l**

white solid, 87% yield, 2.56g, mp:161.4 – 162.6°C.  $^1\text{H}$  NMR (500 MHz,  $\text{CDCl}_3$ ):  $\delta$  7.59 (t,  $J = 2.4$  Hz, 1H), 7.50 – 7.41 (m, 4H), 7.35 – 7.27 (m, 3H), 7.17 – 7.10 (m, 2H), 4.79 (s, 2H), 3.54 (d,  $J = 2.4$  Hz, 2H).  $^{13}\text{C}$  NMR (101 MHz,  $\text{CDCl}_3$ ):  $\delta$  173.6, 170.8, 164.7, 162.7, 135.9, 133.5, 132.3(d,  $J = 8.7$ ), 130.5 (d,  $J = 3.3$ ), 128.9 (d,  $J = 27.8$ ), 128.1, 123.1, 123.1, 116.5 (d,  $J = 22.2$ ), 42.7, 34.1.  $^{19}\text{F}$  NMR (376 MHz,  $\text{CDCl}_3$ ):  $\delta$  -108.6. HRMS (CI+) Calcd for  $\text{C}_{18}\text{H}_{15}\text{FNO}_2^+$   $[\text{M} + \text{H}]^+$ : 296.1087, Found: 296.1069.

**(E)-1-benzyl-3-(4-chlorobenzylidene)pyrrolidine-2,5-dione (1m)**

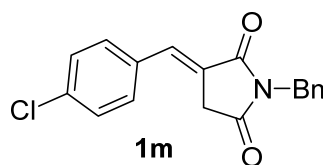

**1m**

white solid, 96% yield, 2.99g, mp:186.8 – 187.4°C.  $^1\text{H}$  NMR (500 MHz,  $\text{CDCl}_3$ ):  $\delta$  7.56 (t,  $J = 2.4$  Hz, 1H), 7.47 – 7.36 (m, 6H), 7.36 – 7.21 (m, 3H), 4.78 (s, 2H), 3.53 (d,  $J = 2.4$  Hz, 2H).  $^{13}\text{C}$  NMR (126 MHz,  $\text{CDCl}_3$ ):  $\delta$  173.5, 170.6, 136.4, 135.8, 133.3, 132.6, 131.4, 129.5, 129.0, 128.8, 128.1, 124.1, 42.7, 34.1. HRMS (CI+) Calcd for  $\text{C}_{18}\text{H}_{15}\text{ClNO}_2^+$   $[\text{M} + \text{H}]^+$ : 312.0791, Found: 312.0782.

**(E)-1-benzyl-3-(4-bromobenzylidene)pyrrolidine-2,5-dione (1n)**

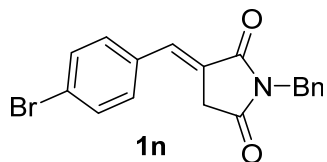

**1n**

white solid, 95% yield, 3.30g, mp:206.5 – 210.1°C.  $^1\text{H}$  NMR (500 MHz,  $\text{CDCl}_3$ ):  $\delta$  7.61 – 7.53 (m, 3H), 7.46 – 7.40 (m, 2H), 7.37 – 7.27 (m, 5H), 4.79 (s, 2H), 3.53 (d,  $J = 2.4$  Hz, 2H).  $^{13}\text{C}$  NMR (126 MHz,  $\text{CDCl}_3$ ):  $\delta$  173.5, 170.6, 135.8, 133.4, 133.0, 132.5, 131.5, 129.1, 128.8, 128.2, 124.8, 124.2, 42.7, 34.1. HRMS (CI+) Calcd for  $\text{C}_{18}\text{H}_{15}\text{BrNO}_2^+$   $[\text{M} + \text{H}]^+$ : 356.0286, Found: 356.0275.

**(E)-1-benzyl-3-(naphthalen-2-ylmethylene)pyrrolidine-2,5-dione (1o)**



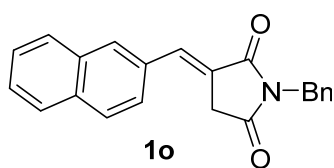

white solid, 96% yield, 3.13g, mp:214.7 – 217.5°C. <sup>1</sup>H NMR (500 MHz, CDCl<sub>3</sub>): δ 7.96 (d, *J* = 1.7 Hz, 1H), 7.91 – 7.82 (m, 3H), 7.78 (t, *J* = 2.5 Hz, 1H), 7.59 – 7.51 (m, 3H), 7.50 – 7.43 (m, 2H), 7.37 – 7.26 (m, 3H), 4.82 (s, 2H), 3.68 (d, *J* = 2.4 Hz, 2H). <sup>13</sup>C NMR (126 MHz, CDCl<sub>3</sub>): δ 173.9, 170.9, 136.0, 134.9, 133.9, 133.3, 131.7, 131.6, 129.1, 129.0, 128.8, 128.8, 128.1, 127.9, 127.1, 126.1, 123.5, 42.7, 34.4. HRMS (CI<sup>+</sup>) Calcd for C<sub>22</sub>H<sub>18</sub>NO<sub>2</sub><sup>+</sup> [M + H]<sup>+</sup>: 328.1338, Found: 328.1328.

## Synthesis of MBH carbonates 2.

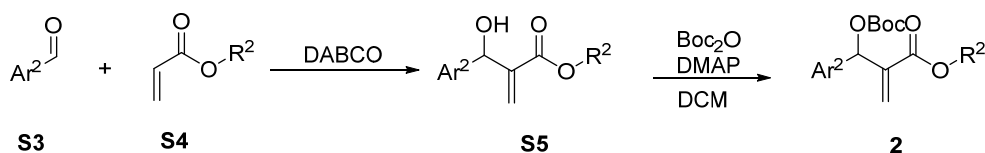

The procedure was according to the reported literature.<sup>2</sup> To a solution of aldehyde **S3** (10 mmol) in acrylate **S4** (20 mL), was added 1,4-diazabicyclo[2.2.2]octane (DABCO, 10.5 mmol) at room temperature. The reaction mixture was stirred at room temperature for 3-7 days. When the reaction was completed (monitored by TLC), the reaction mixture was purified by silica gel column chromatography to afford MBH alcohol **S5**.

To a solution of MBH alcohol **S5** and Boc-anhydride (15 mmol) in CH<sub>2</sub>Cl<sub>2</sub> (30 mL) was added 4-(dimethylamino)pyridine (DMAP, 2.08 mmol) in batches. When the reaction was completed (monitored by TLC), the organic phase was washed with distilled water (2 x 20 mL), dried over anhydrous Na<sub>2</sub>SO<sub>4</sub> and the solvent was removed under reduced pressure. The residue was purified by silica gel column chromatography affording MBH carbonate **2**.

### Methyl 2-(((tert-butoxycarbonyl)oxy)(phenyl)methyl)acrylate (**2a**)

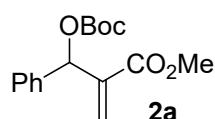

white solid, 81% yields, 2.37g. <sup>1</sup>H NMR (600 MHz, CDCl<sub>3</sub>): δ 7.41 – 7.29 (m, 5H), 6.48 (s, 1H), 6.41 (s, 1H), 5.91 (s, 1H), 3.71 (s, 3H), 1.46 (s, 9H). <sup>13</sup>C NMR (151 MHz, CDCl<sub>3</sub>): δ 165.5, 152.5, 139.8, 137.6, 128.6, 128.6, 127.8, 126.0, 82.8, 75.9, 52.1, 27.9.

### Methyl 2-(((tert-butoxycarbonyl)oxy)(p-tolyl)methyl)acrylate (**2b**)

<sup>2</sup> J. T. M. Correia, L.V. Acconcia, F. Coelho, *Eur. J. Org. Chem.* **2016**, 11, 1972-1976.



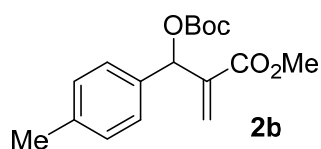

white solid, 72% yields, 2.20g.  $^1\text{H}$  NMR (500 MHz,  $\text{CDCl}_3$ ):  $\delta$  7.28 (d,  $J$  = 8.2 Hz, 2H), 7.14 (d,  $J$  = 7.9 Hz, 2H), 6.45 (s, 1H), 6.39 (t,  $J$  = 1.0 Hz, 1H), 5.91 (t,  $J$  = 1.3 Hz, 1H), 3.70 (s, 3H), 2.33 (s, 3H), 1.46 (s, 9H).  $^{13}\text{C}$  NMR (126 MHz,  $\text{CDCl}_3$ ):  $\delta$  165.58, 152.57, 139.85, 138.40, 134.61, 129.29, 127.75, 125.72, 82.67, 75.85, 52.11, 27.89, 21.33.

**Methyl 2-(((tert-butoxycarbonyl)oxy)(4-methoxyphenyl)methyl)acrylate (2c)**

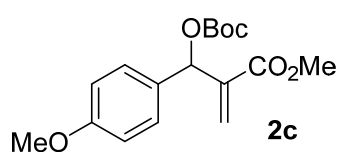

white solid, 75% yields, 2.42g.  $^1\text{H}$  NMR (600 MHz,  $\text{CDCl}_3$ ):  $\delta$  7.35 – 7.29 (m, 2H), 6.89 – 6.82 (m, 2H), 6.43 (s, 1H), 6.38 (s, 1H), 5.92 (s, 1H), 3.79 (s, 3H), 3.70 (s, 3H), 1.45 (s, 9H).  $^{13}\text{C}$  NMR (126 MHz,  $\text{CDCl}_3$ ):  $\delta$  165.6, 159.8, 152.6, 139.9, 129.6, 129.3, 125.3, 114.0, 82.7, 75.7, 55.4, 52.1, 27.9.

**Methyl 2-(((tert-butoxycarbonyl)oxy)(4-fluorophenyl)methyl)acrylate (2d)**

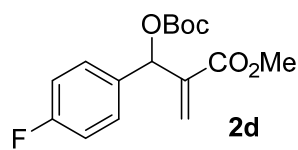

yellow solid, 59% yields, 1.83g.  $^1\text{H}$  NMR (500 MHz,  $\text{CDCl}_3$ ):  $\delta$  7.42 – 7.35 (m, 2H), 7.02 (t,  $J$  = 8.7 Hz, 2H), 6.44 (d,  $J$  = 1.1 Hz, 1H), 6.40 (t,  $J$  = 0.9 Hz, 1H), 5.94 (dd,  $J$  = 1.5, 0.9 Hz, 1H), 3.71 (s, 3H), 1.46 (s, 9H).  $^{13}\text{C}$  NMR (126 MHz,  $\text{CDCl}_3$ ):  $\delta$  165.3, 162.7 (d,  $J$  = 248.2 Hz), 152.3, 139.5, 133.4 (d,  $J$  = 3.2 Hz), 129.6 (d,  $J$  = 8.6), 125.6, 115.4 (d,  $J$  = 21.4), 82.9, 52.1, 27.7.  $^{19}\text{F}$  NMR (565 MHz,  $\text{CDCl}_3$ ):  $\delta$  -113.4.

**Methyl 2-(((tert-butoxycarbonyl)oxy)(4-chlorophenyl)methyl)acrylate (2e)**

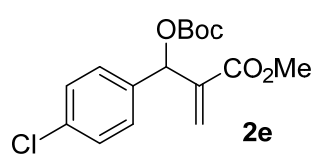

white solid, 62% yields, 2.02g.  $^1\text{H}$  NMR (500 MHz,  $\text{CDCl}_3$ ):  $\delta$  7.36 – 7.29 (m, 4H), 6.43 (d,  $J$  = 1.2 Hz, 1H), 6.41 (t,  $J$  = 0.9 Hz, 1H), 5.94 (dd,  $J$  = 1.5, 0.8 Hz, 1H), 3.71 (s, 3H), 1.46 (s, 9H).  $^{13}\text{C}$  NMR (126 MHz,  $\text{CDCl}_3$ ):  $\delta$  165.3, 152.4, 139.4, 136.3, 134.5, 129.2, 128.8, 126.1, 83.1, 75.2, 52.2, 27.9.

**Methyl 2-(((tert-butoxycarbonyl)oxy)(naphthalen-2-yl)methyl)acrylate (2f)**

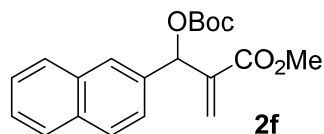

white solid, 77% yields, 2.63g.  $^1\text{H}$  NMR (500 MHz,  $\text{CDCl}_3$ ):  $\delta$  7.90 – 7.78 (m, 4H), 7.54 – 7.45 (m, 3H), 6.66 (s, 1H), 6.45 (d,  $J$  = 0.9 Hz, 1H), 6.04 – 5.97 (m, 1H), 3.71 (s, 3H), 1.47 (s, 9H).  $^{13}\text{C}$  NMR (126 MHz,  $\text{CDCl}_3$ ):  $\delta$  165.6, 152.6, 139.7, 135.0,



133.4, 133.2, 128.4, 128.4, 127.8, 127.2, 126.5, 126.3, 126.3, 125.3, 82.9, 76.0, 52.2, 27.9.

**Methyl 2-(((tert-butoxycarbonyl)oxy)(thiophen-2-yl)methyl)acrylate (2g)**

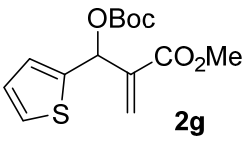**2g** Colorless oil, 75% yields, 2.24g. <sup>1</sup>H NMR (500 MHz, CDCl<sub>3</sub>): δ 7.31 – 7.27 (m, 1H), 7.09 – 7.08 (m, 1H), 6.97 – 6.94 (m, 1H), 6.73 (s, 1H), 6.44 (s, 1H), 6.07 – 6.03 (m, 1H), 3.73 (s, 3H), 1.47 (s, 9H). <sup>13</sup>C NMR (126 MHz, CDCl<sub>3</sub>): δ 165.3, 152.3, 140.5, 139.4, 127.5, 126.9, 126.6, 125.9, 83.1, 71.0, 52.3, 27.9.

**Ethyl 2-(((tert-butoxycarbonyl)oxy)(phenyl)methyl)acrylate (2h)**

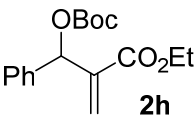**2h** Colorless oil, 80% yields, 2.45g. <sup>1</sup>H NMR (500 MHz, CDCl<sub>3</sub>): δ 7.41 – 7.29 (m, 5H), 6.49 – 6.47 (m, 1H), 6.40 (t, *J* = 1.0 Hz, 1H), 5.90 – 5.88 (m, 1H), 4.22 – 4.10 (m, 2H), 1.46 (s, 9H), 1.22 (t, *J* = 7.1 Hz, 3H). <sup>13</sup>C NMR (126 MHz, CDCl<sub>3</sub>): δ 165.1, 152.6, 140.0, 137.7, 128.6, 128.5, 127.9, 125.7, 82.8, 76.0, 61.1, 27.9, 14.1.

**Benzyl 2-(((tert-butoxycarbonyl)oxy)(phenyl)methyl)acrylate (2i)**

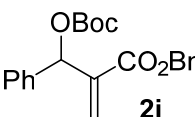**2i** Colorless oil, 67% yields, 2.47g. <sup>1</sup>H NMR (600 MHz, CDCl<sub>3</sub>): δ 7.41 – 7.28 (m, 8H), 7.25 – 7.20 (m, 2H), 6.49 (s, 1H), 6.46 (s, 1H), 5.94 (s, 1H), 5.20 – 5.08 (m, 2H), 1.44 (s, 9H). <sup>13</sup>C NMR (151 MHz, CDCl<sub>3</sub>): δ 164.9, 152.5, 139.7, 137.6, 135.6, 128.64, 128.61, 128.3, 128.2, 127.9, 127.1, 126.3, 82.8, 76.0, 66.9, 27.9.

**Butyl 2-(((tert-butoxycarbonyl)oxy)(phenyl)methyl)acrylate (2j)**

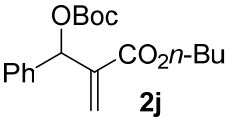**2j** Colorless oil, 71% yields, 2.37g. <sup>1</sup>H NMR (500 MHz, CDCl<sub>3</sub>): δ 7.41 – 7.37 (m, 2H), 7.35 – 7.29 (m, 3H), 6.47 (s, 1H), 6.41 (t, *J* = 1.1 Hz, 1H), 5.91 – 5.85 (m, 1H), 4.14 – 4.07 (m, 2H), 1.59 – 1.55 (m, 2H), 1.46 (s, 9H), 1.29 – 1.25 (m, 2H), 0.88 (t, *J* = 7.4 Hz, 3H). <sup>13</sup>C NMR (126 MHz, CDCl<sub>3</sub>): δ 165.2, 152.5, 139.9, 137.7, 128.6, 128.1, 127.9, 125.8, 82.8, 76.0, 65.0, 30.6, 27.9, 19.2, 13.8.

**Isobutyl 2-(((tert-butoxycarbonyl)oxy)(phenyl)methyl)acrylate (2k)**

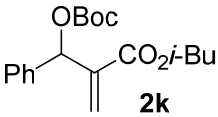**2k** Colorless oil, 76% yields, 2.54g. <sup>1</sup>H NMR (500 MHz, CDCl<sub>3</sub>): δ



7.42 – 7.29 (m, 5H), 6.48 (s, 1H), 6.43 (t,  $J = 1.0$  Hz, 1H), 5.89 (t,  $J = 1.3$  Hz, 1H), 3.94 – 3.83 (m, 2H), 1.95 – 1.83 (m, 1H), 1.46 (s, 9H), 0.86 (dd,  $J = 6.8, 2.4$  Hz, 6H).  
 **$^{13}\text{C}$  NMR** (126 MHz,  $\text{CDCl}_3$ ):  $\delta$ 165.2, 152.6, 139.9, 137.7, 128.6 (2C), 127.9, 126.0, 82.7, 76.0, 71.2, 27.9, 19.2.



### III. Chiral phosphine catalyzed allylic alkylations

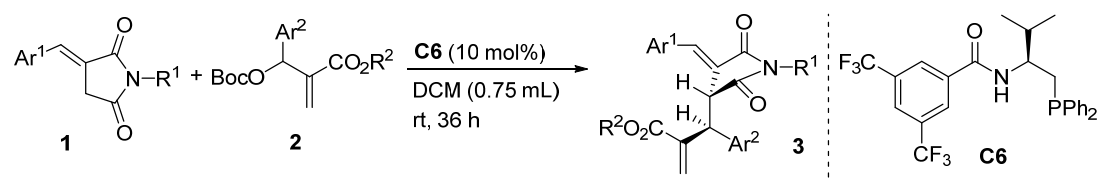

To a solution of DCM (0.75 mL) were added *N*-protected succinimide substrate **1** (1 equiv, 0.05 mmol), MBH carbonate **2** (1.2 equiv, 0.06 mmol) and catalyst **C6** (2.5 mg, 10 mol%, 0.005 mmol). The reaction mixture was stirred at r.t. for 36 h. Then the mixture was purified by preparative TLC (eluent: PE/EA = 2:1) to yield the desired product **3**.

#### Methyl 2-((*S*)-((*R*)-4-((*E*)-benzylidene)-2,5-dioxo-1-phenylpyrrolidin-3-yl)(phenyl) methyl)acrylate (**3aa**)

pale yellow solid, 96% yield (21.0 mg, 11:1 dr), mp: 160.6 – 161.6 °C.  $[\alpha]_D^{25}$ : +110 (c = 1.0, CHCl<sub>3</sub>). HPLC analysis of the product: Daicel CHIRALPAK IF-3 column; 20% *i*PrOH in hexanes; 1.0 mL/min; retention times: 12.52 min (major), 14.788 min (minor). 81% ee. <sup>1</sup>H NMR (500 MHz, CDCl<sub>3</sub>): δ 7.74 (d, *J* = 2.2 Hz, 1H), 7.73 – 7.68 (m, 2H), 7.59 – 7.49 (m, 3H), 7.43 – 7.40 (m, 2H), 7.38 – 7.36 (m, 1H), 7.28 – 7.21 (m, 3H), 6.97 – 6.90 (m, 4H), 6.63 (d, *J* = 1.2 Hz, 1H), 6.29 (d, *J* = 1.8 Hz, 1H), 4.87 (t, *J* = 2.7 Hz, 1H), 4.66 – 4.61 (m, 1H), 3.75 (s, 3H). <sup>13</sup>C NMR (126 MHz, CDCl<sub>3</sub>): δ 174.7, 169.4, 167.3, 140.0, 136.3, 136.0, 133.5, 131.8, 130.63, 130.62, 129.4, 129.1, 129.0, 128.73, 128.71, 128.65, 128.1, 127.7, 126.5, 52.3, 46.5, 46.5. HRMS (CI<sup>+</sup>) Calcd for C<sub>28</sub>H<sub>24</sub>NO<sub>4</sub><sup>+</sup> [M + H]<sup>+</sup>: 438.1705, Found: 438.1700.

#### Methyl 2-((*S*)-((*R*)-4-((*E*)-benzylidene)-1-methyl-2,5-dioxopyrrolidin-3-yl)(phenyl) methyl)acrylate (**3ba**)

white solid, 91% yield (17.1 mg, 5:1 dr), mp: 74.0 – 76.0 °C.  $[\alpha]_D^{25}$ : +240 (c = 1.0, CHCl<sub>3</sub>). HPLC analysis of the product: Daicel CHIRALPAK IE-3 column; 10% *i*PrOH in hexanes; 1.0 mL/min; retention times: 18.694 min (minor), 19.832 min (major). 81% ee. <sup>1</sup>H NMR (400 MHz, CDCl<sub>3</sub>): δ 7.63 (dd, *J* = 7.1, 1.8 Hz, 2H), 7.56



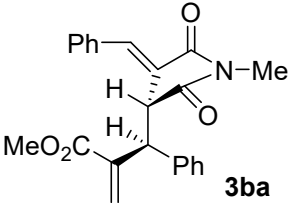
**3ba** (d,  $J = 2.1$  Hz, 1H), 7.54 – 7.27 (m, 5H), 7.21 – 7.09 (m, 3H), 6.80 – 6.71 (m, 2H), 6.55 (d,  $J = 1.4$  Hz, 1H), 6.10 (d,  $J = 1.8$  Hz, 1H), 4.70 (m, 1H), 4.52 – 4.46 (m, 1H), 3.74 (s, 3H), 2.82 (s, 3H).  $^{13}\text{C}$  NMR (101 MHz,  $\text{CDCl}_3$ ):  $\delta$  175.9, 170.4, 167.4, 140.0, 136.2, 134.9, 133.6, 130.5, 129.3, 129.0, 128.7, 128.5, 128.4, 127.9, 127.8, 52.3, 46.24, 46.18, 24.6. HRMS (CI<sup>+</sup>) Calcd for  $\text{C}_{23}\text{H}_{22}\text{NO}_4^+$  [ $\text{M} + \text{H}$ ]<sup>+</sup>: 376.1549, Found: 376.1540.

**Methyl 2-((S)-((R)-1-benzyl-4-((E)-benzylidene)-2,5-dioxopyrrolidin-3-yl)(phenyl) methyl)acrylate (3ca)**

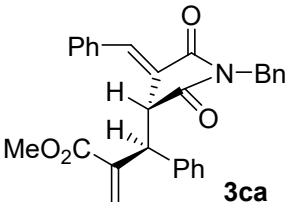
**3ca** white solid, 96% yield (21.7 mg, 11:1 dr), mp: 75.6 – 77.0 °C.  $[\alpha]_{\text{D}}^{25}$ : +158 (c = 1.0,  $\text{CHCl}_3$ ). HPLC analysis of the product: Daicel CHIRALPAK IE-3 column; 10% *i*PrOH in hexanes; 1.0 mL/min; retention times: 13.358 min (minor), 14.456 min (major). 92% ee.  $^1\text{H}$  NMR (500 MHz,  $\text{CDCl}_3$ ):  $\delta$  7.57 – 7.52 (m, 2H), 7.48 (d,  $J = 2.3$  Hz, 1H), 7.46 – 7.36 (m, 3H), 7.21 – 7.18 (m, 5H), 7.00 – 6.94 (m, 1H), 6.84 – 6.77 (m, 2H), 6.50 – 6.44 (m, 2H), 6.41 (d,  $J = 1.6$  Hz, 1H), 5.78 (d,  $J = 1.8$  Hz, 1H), 4.67 (dd,  $J = 4.0, 2.3$  Hz, 1H), 4.50 (s, 2H), 4.44 – 4.40 (m, 1H), 3.68 (s, 3H).  $^{13}\text{C}$  NMR (126 MHz,  $\text{CDCl}_3$ ):  $\delta$  175.5, 170.1, 167.5, 140.2, 135.9, 133.7, 130.4, 130.3, 129.24, 129.23, 128.8, 128.7, 128.5, 128.4, 127.9, 127.7, 127.6, 52.3, 45.8, 45.6, 42.5. HRMS (CI<sup>+</sup>) Calcd for  $\text{C}_{29}\text{H}_{26}\text{NO}_4^+$  [ $\text{M} + \text{H}$ ]<sup>+</sup>: 452.1862, Found: 452.1857.

**Methyl 2-((S)-((R)-4-((E)-benzylidene)-1-butyl-2,5-dioxopyrrolidin-3-yl)(phenyl) methyl)acrylate (3da)**

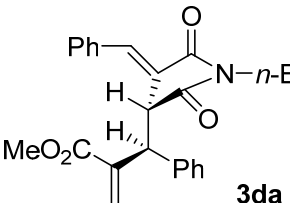
**3da** white solid, 91% yield (19.0 mg, 11:1 dr), mp: 71.6 – 73.0 °C.  $[\alpha]_{\text{D}}^{25}$ : +315 (c = 1.0,  $\text{CHCl}_3$ ). HPLC analysis of the product: Daicel CHIRALPAK IE-3 column; 10% *i*PrOH in hexanes; 1.0 mL/min; retention times: 13.312 min (minor), 14.771 min (major). 82% ee.  $^1\text{H}$  NMR (400 MHz,  $\text{CDCl}_3$ ):  $\delta$  7.63 – 7.55 (m, 3H), 7.52 – 7.42 (m, 3H), 7.19 – 7.07 (m, 3H), 6.84 – 6.76 (m, 2H), 6.59 (d,  $J = 1.2$



Hz, 1H), 6.23 (d,  $J = 1.7$  Hz, 1H), 4.63 (t,  $J = 2.7$  Hz, 1H), 4.52 – 4.50 (m, 1H), 3.70 (s, 3H), 3.35 (td,  $J = 7.1, 4.0$  Hz, 2H), 1.21 (dt,  $J = 14.3, 7.8$  Hz, 2H), 1.16 – 1.02 (m, 2H), 0.83 (t,  $J = 7.2$  Hz, 3H).  $^{13}\text{C}$  NMR (126 MHz,  $\text{CDCl}_3$ ):  $\delta$  175.7, 170.4, 167.3, 140.4, 136.3, 134.8, 133.6, 130.5, 130.3, 129.3, 128.9, 128.49, 128.47, 128.0, 127.9, 52.3, 46.2, 45.9, 38.6, 29.7, 20.2, 13.8. HRMS (CI<sup>+</sup>) Calcd for  $\text{C}_{26}\text{H}_{28}\text{NO}_4^+ [\text{M} + \text{H}]^+$ : 418.2018, Found: 418.2008.

**Methyl 2-((*S*)-((*R*)-4-((*E*)-benzylidene)-1-(tert-butyl)-2,5-dioxopyrrolidin-3-yl)(phenyl)methyl)acrylate (3ea)**

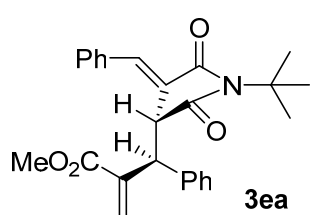

white solid, 94% yield (19.6 mg, 14:1 dr), mp: 63.2 – 64.7 °C.  $[\alpha]_{\text{D}}^{25}$ : +310 ( $c = 1.0$ ,  $\text{CHCl}_3$ ). HPLC analysis of the product: Daicel CHIRALPAK IE-3 column; 10%  $i\text{PrOH}$  in hexanes; 1.0 mL/min; retention times: 7.653 min (minor),

8.803 min (major). 92% ee.  $^1\text{H}$  NMR (400 MHz,  $\text{CDCl}_3$ ):  $\delta$  7.62 – 7.39 (m, 6H), 7.19 – 7.17 (m, 3H), 6.93 – 6.83 (m, 2H), 6.59 (t,  $J = 0.9$  Hz, 1H), 6.29 (d,  $J = 1.6$  Hz, 1H), 4.49 (t,  $J = 2.6$  Hz, 1H), 4.47 – 4.45 (m, 1H), 3.68 (s, 3H), 1.35 (s, 9H).  $^{13}\text{C}$  NMR (101 MHz,  $\text{CDCl}_3$ ):  $\delta$  176.6, 171.5, 167.3, 140.6, 136.4, 133.8, 133.7, 130.4, 130.1, 130.0, 129.2, 129.0, 128.51, 128.47, 128.3, 127.8, 58.5, 52.3, 46.5, 46.4, 28.3. HRMS (CI<sup>+</sup>) Calcd for  $\text{C}_{26}\text{H}_{28}\text{NO}_4^+ [\text{M} + \text{H}]^+$ : 418.2018, Found: 418.2013.

**Methyl 2-((*S*)-((*R*)-4-((*E*)-benzylidene)-1-(naphthalen-1-ylmethyl)-2,5-dioxopyrrolidin-3-yl)(phenyl)methyl)acrylate (3fa)**

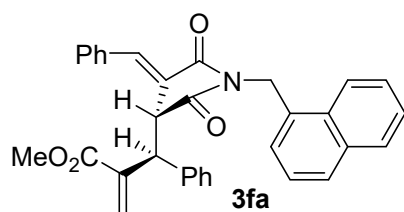

white solid, 91% yield (22.8 mg, 13:1 dr), mp: 97.6 – 99.8 °C.  $[\alpha]_{\text{D}}^{25}$ : +120 ( $c = 1.0$ ,  $\text{CHCl}_3$ ). HPLC analysis of the product: Daicel CHIRALPAK IE-3 column; 10%  $i\text{PrOH}$  in hexanes; 1.0 mL/min;

retention times: 23.246 min (minor), 24.53 min (major). 81% ee.  $^1\text{H}$  NMR (500 MHz,  $\text{CDCl}_3$ ):  $\delta$  8.33 – 8.21 (m, 1H), 7.87 – 7.85 (m, 1H), 7.80 – 7.78 (m, 1H), 7.67 – 7.58 (m, 3H), 7.52 – 7.47 (m, 3H), 7.47 – 7.42 (m, 1H), 7.38 – 7.32 (m, 2H), 6.82 (tt,  $J = 7.2, 1.2$  Hz, 1H), 6.61 (t,  $J = 7.8$  Hz, 2H), 6.53 – 6.45 (m, 3H), 5.95 (d,  $J = 1.8$  Hz, 1H), 5.04 (q,  $J = 12.4$  Hz, 2H), 4.72 (t,  $J = 3.0$  Hz, 1H), 4.49 – 4.48 (m, 1H), 3.72 (s,



3H). **<sup>13</sup>C NMR** (126 MHz, CDCl<sub>3</sub>):  $\delta$  175.7, 170.2, 167.4, 140.1, 135.7, 135.6, 133.9, 133.6, 131.6, 130.52, 130.47, 130.4, 129.3, 128.72, 128.66, 128.63, 128.56, 128.4, 128.2, 127.6, 127.5, 126.6, 125.9, 125.4, 124.0, 52.3, 46.1, 45.7, 40.4. **HRMS** (CI<sup>+</sup>) Calcd for C<sub>33</sub>H<sub>28</sub>NO<sub>4</sub><sup>+</sup> [M + H]<sup>+</sup>: 502.2018, Found: 502.2012.

**Methyl 2-((*S*)-((*R*)-1-benzyl-4-((*E*)-4-methylbenzylidene)-2,5-dioxopyrrolidin-3-yl)(phenyl)methyl) acrylate (3ga)**

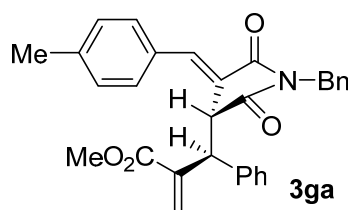

white solid, 86% yield (20.0 mg, 10:1 dr), mp: 76.7 – 77.8 °C. [ $\alpha$ ]<sub>D</sub><sup>25</sup>: +152 (c = 1.0, CHCl<sub>3</sub>). HPLC analysis of the product: Daicel CHIRALPAK IE-3 column; 10% *i*PrOH in hexanes; 1.0 mL/min; retention times: 18.464

min (minor), 23.692 min (major). 90% ee. **<sup>1</sup>H NMR** (500 MHz, CDCl<sub>3</sub>):  $\delta$  7.49 – 7.41 (m, 3H), 7.23 (d, *J* = 7.9 Hz, 2H), 7.20 - 7.16 (m, 5H), 6.97 (t, *J* = 7.4 Hz, 1H), 6.81 (t, *J* = 7.8 Hz, 2H), 6.49 (dd, *J* = 8.2, 1.3 Hz, 2H), 6.41 (d, *J* = 1.4 Hz, 1H), 5.82 (d, *J* = 1.8 Hz, 1H), 4.63 (dd, *J* = 4.0, 2.3 Hz, 1H), 4.48 (s, 2H), 4.47 - 4.46 (m, 1H), 3.69 (s, 3H), 2.34 (s, 3H). **<sup>13</sup>C NMR** (126 MHz, CDCl<sub>3</sub>):  $\delta$  175.6, 170.3, 167.6, 140.9, 140.2, 136.0, 135.5, 130.8, 130.6, 130.4, 130.0, 129.2, 128.8, 128.7, 128.4, 128.3, 127.9, 127.7, 126.5, 52.3, 45.9, 45.6, 42.5, 21.7. **HRMS** (CI<sup>+</sup>) Calcd for C<sub>30</sub>H<sub>28</sub>NO<sub>4</sub><sup>+</sup> [M + H]<sup>+</sup>: 466.2018, Found: 466.2008.

**Methyl 2-((*S*)-((*R*)-1-benzyl-4-((*E*)-4-(methylthio)benzylidene)-2,5-dioxopyrrolidin-3-yl)(phenyl)methyl)acrylate (3ha)**

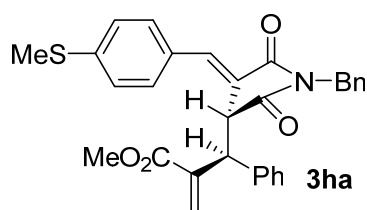

white solid, 93% yield (23.1 mg, 11:1 dr), mp: 91.6 – 92.3 °C. [ $\alpha$ ]<sub>D</sub><sup>25</sup>: +165 (c = 1.0, CHCl<sub>3</sub>). HPLC analysis of the product: Daicel CHIRALPAK IE-3 column; 10% *i*PrOH in hexanes; 1.0 mL/min; retention times: 27.053

min (minor), 29.227 min (major). 84% ee. **<sup>1</sup>H NMR** (500 MHz, CDCl<sub>3</sub>):  $\delta$  7.54 (d, *J* = 8.5 Hz, 2H), 7.46 (d, *J* = 2.1 Hz, 1H), 7.31 (d, *J* = 8.5 Hz, 2H), 7.25 (d, *J* = 3.7 Hz, 5H), 7.06 – 6.99 (m, 1H), 6.87 (t, *J* = 7.8 Hz, 2H), 6.55 (dd, *J* = 8.1, 1.4 Hz, 2H), 6.47 (d, *J* = 1.5 Hz, 1H), 5.83 (d, *J* = 1.9 Hz, 1H), 4.69 (dd, *J* = 4.1, 2.2 Hz, 1H), 4.55 (s, 2H), 4.51 (dd, *J* = 4.0, 1.9 Hz, 1H), 3.77 (s, 3H), 2.53 (s, 3H). **<sup>13</sup>C NMR** (126 MHz,



CDCl<sub>3</sub>):  $\delta$  175.5, 170.2, 167.6, 142.4, 140.1, 135.9, 135.5, 134.9, 130.9, 129.9, 129.3, 128.8, 128.7, 128.5, 128.4, 127.9, 127.8, 126.4, 126.0, 52.4, 45.8, 45.6, 42.5, 15.1.

**HRMS** (CI<sup>+</sup>) Calcd for C<sub>30</sub>H<sub>28</sub>NO<sub>4</sub>S<sup>+</sup> [M + H]<sup>+</sup>: 498.1739, Found: 498.1731.

**Methyl 2-((*S*)-((*R*)-1-benzyl-4-((*E*)-4-methoxybenzylidene)-2,5-dioxopyrrolidin-3-yl)(phenyl)methyl)acrylate (3ia)**

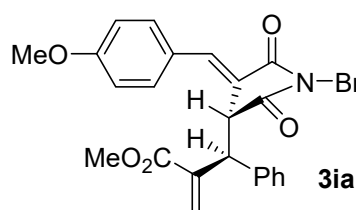

white solid, 92% yield (22.1 mg, 9:1 dr), mp: 102.9 – 103.6 °C. [ $\alpha$ ]<sub>D</sub><sup>25</sup>: +168 (c = 1.0, CHCl<sub>3</sub>). HPLC analysis of the product: Daicel CHIRALPAK IE-3 column; 10% *i*PrOH in hexanes; 1.0 mL/min; retention times: 35.278

min (minor), 37.542 min (major). 91% ee. **<sup>1</sup>H NMR** (500 MHz, CDCl<sub>3</sub>):  $\delta$  7.59 (d, *J* = 8.8 Hz, 2H), 7.50 (d, *J* = 2.2 Hz, 1H), 7.29 – 7.24 (m, 5H), 7.07 – 6.97 (m, 3H), 6.89 (t, *J* = 7.8 Hz, 2H), 6.63 – 6.56 (m, 2H), 6.50 (d, *J* = 1.4 Hz, 1H), 5.93 (d, *J* = 1.8 Hz, 1H), 4.68 – 4.64 (m, 1H), 4.57 – 4.55 (m, 1H), 4.54 (s, 2H), 3.88 (s, 3H), 3.76 (s, 3H). **<sup>13</sup>C NMR** (126 MHz, CDCl<sub>3</sub>):  $\delta$  175.6, 170.4, 167.6, 161.3, 140.3, 135.9, 135.6, 135.2, 132.5, 129.2, 128.8, 128.7, 128.40, 128.36, 127.8, 127.7, 126.2, 124.9, 114.7, 55.6, 52.3, 45.9, 45.6, 42.4. **HRMS** (CI<sup>+</sup>) Calcd for C<sub>30</sub>H<sub>28</sub>NO<sub>5</sub><sup>+</sup> [M + H]<sup>+</sup>: 482.1967, Found: 482.1958.

**Methyl 2-((*S*)-((*R*)-1-benzyl-4-((*E*)-3,5-dimethoxybenzylidene)-2,5-dioxopyrrolidin-3-yl)(phenyl)methyl)acrylate (3ja)**

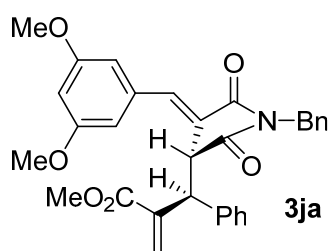

white solid, 90% yield (23.0 mg, 11:1 dr), mp: 84.5 – 86.7 °C. [ $\alpha$ ]<sub>D</sub><sup>25</sup>: +101 (c = 1.0, CHCl<sub>3</sub>). HPLC analysis of the product: Daicel CHIRALPAK IF-3 column; 10% *i*PrOH in hexanes; 1.0 mL/min; retention times: 18.95 min (minor), 20.149 min (major). 98% ee. **<sup>1</sup>H NMR** (500

MHz, CDCl<sub>3</sub>):  $\delta$  7.47 (d, *J* = 2.3 Hz, 1H), 7.29 – 7.26 (m, 5H), 7.05 (t, *J* = 7.4 Hz, 1H), 6.90 (t, *J* = 7.6 Hz, 2H), 6.72 (d, *J* = 2.3 Hz, 2H), 6.61 – 6.56 (m, 2H), 6.55 (t, *J* = 2.3 Hz, 1H), 6.47 (d, *J* = 1.5 Hz, 1H), 5.84 (d, *J* = 1.9 Hz, 1H), 4.77 (dd, *J* = 4.2, 2.3 Hz, 1H), 4.56 (s, 3H), 3.85 (s, 6H), 3.74 (s, 3H). **<sup>13</sup>C NMR** (126 MHz, CDCl<sub>3</sub>):  $\delta$  175.3, 170.0, 167.3, 161.1, 140.4, 135.9, 135.5, 135.4, 129.1, 128.7, 128.6, 128.3,



128.2, 127.9, 127.8, 127.6, 107.9, 103.0, 55.6, 52.2, 45.9, 45.6, 42.4. **HRMS** (CI<sup>+</sup>) Calcd for C<sub>31</sub>H<sub>30</sub>NO<sub>6</sub><sup>+</sup> [M + H]<sup>+</sup>: 512.2073, Found: 512.2065.

**Methyl 2-((S)-((R)-1-benzyl-4-((E)-2-methoxybenzylidene)-2,5-dioxopyrrolidin-3-yl)(phenyl)methyl)acrylate (3ka)**

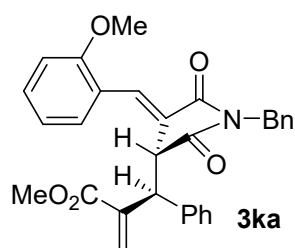

white solid, 94% yield (22.6 mg, 3:1 dr), mp: 59.9 – 62.3 °C.

[α]<sub>D</sub><sup>25</sup>: +40 (c = 1.0, CHCl<sub>3</sub>). HPLC analysis of the product:

Daicel CHIRALPAK IE-3 column; 10% *i*PrOH in hexanes;

1.0 mL/min; retention times: 25.547 min (minor), 31.706 min

(major). 28% ee. **<sup>1</sup>H NMR** (500 MHz, CDCl<sub>3</sub>): δ 7.86 (d, *J* =

2.4 Hz, 1H), 7.57 – 7.55 (m, 1H), 7.44 – 7.40 (m, 1H), 7.25 – 7.14 (m, 5H), 7.08 –

7.02 (m, 2H), 6.97 (d, *J* = 8.3 Hz, 1H), 6.88 (t, *J* = 7.7 Hz, 2H), 6.55 (d, *J* = 7.8 Hz,

2H), 6.44 (d, *J* = 1.3 Hz, 1H), 5.89 (d, *J* = 1.8 Hz, 1H), 4.69 – 4.66 (m, 1H), 4.58 (d, *J*

= 4.0 Hz, 2H), 4.33 – 4.29 (m, 1H), 3.88 (s, 3H), 3.69 (s, 3H). **<sup>13</sup>C NMR** (126 MHz,

CDCl<sub>3</sub>): δ 175.6, 170.0, 167.3, 158.3, 140.6, 136.1, 135.5, 131.7, 131.5, 130.0, 129.1,

129.0, 128.7, 128.5, 128.2, 127.9, 127.7, 127.4, 122.7, 120.7, 111.0, 55.6, 52.1, 46.2,

45.4, 42.3. **HRMS** (CI<sup>+</sup>) Calcd for C<sub>30</sub>H<sub>28</sub>NO<sub>5</sub><sup>+</sup> [M + H]<sup>+</sup>: 482.1967, Found:

482.1958.

**Methyl 2-((S)-((R)-1-benzyl-4-((E)-4-fluorobenzylidene)-2,5-dioxopyrrolidin-3-yl)(phenyl)methyl)acrylate (3la)**

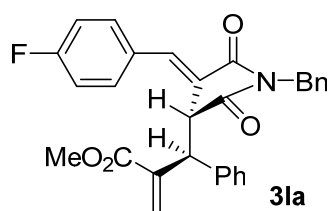

white solid, 92% yield (21.6 mg, 9:1 dr), mp: 62.8 –

63.5 °C. [α]<sub>D</sub><sup>25</sup>: +102 (c = 1.0, CHCl<sub>3</sub>). HPLC analysis of

the product: Daicel CHIRALPAK IE-3 column; 10%

*i*PrOH in hexanes; 1.0 mL/min; retention times: 13.027

min (minor), 14.371 min (major). 76% ee. **<sup>1</sup>H NMR** (500 MHz, CDCl<sub>3</sub>): δ 7.67 – 7.60

(m, 2H), 7.50 (d, *J* = 2.4 Hz, 1H), 7.28 – 7.27 (m, 4H), 7.23 – 7.15 (m, 2H), 7.07 –

7.01 (m, 1H), 6.88 (t, *J* = 7.8 Hz, 2H), 6.53 (dt, *J* = 8.3, 1.4 Hz, 2H), 6.47 (d, *J* = 1.5

Hz, 1H), 5.79 (d, *J* = 1.8 Hz, 1H), 4.70 (dd, *J* = 4.2, 2.3 Hz, 1H), 4.58 (s, 2H), 4.47 –

4.44 (m, 1H), 3.78 (s, 3H). **<sup>13</sup>C NMR** (126 MHz, CDCl<sub>3</sub>): δ 175.3, 169.9, 167.5, 163.6

(d, *J* = 253.1 Hz), 139.9, 135.6, 135.3, 134.1, 132.4 (d, *J* = 8.6 Hz), 129.79, 129.76,



129.2, 129.1, 128.64, 128.62, 128.41, 128.36, 127.9, 127.7, 127.1 (d,  $J = 2.0$  Hz), 116.4 (d,  $J = 21.9$  Hz), 52.3, 45.5, 45.4, 42.4.  $^{19}\text{F}$  NMR (376 MHz,  $\text{CDCl}_3$ ):  $\delta$  -108.8. HRMS (CI $^+$ ) Calcd for  $\text{C}_{29}\text{H}_{25}\text{FNO}_4^+$   $[\text{M} + \text{H}]^+$ : 470.1768, Found: 470.1757.

**Methyl 2-((*S*)-((*R*)-1-benzyl-4-((*E*)-4-chlorobenzylidene)-2,5-dioxopyrrolidin-3-yl)(phenyl)methyl)acrylate (3ma)**

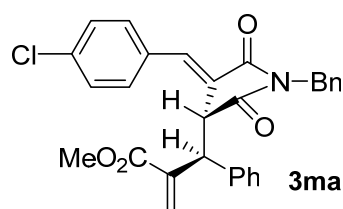

white solid, 93% yield (22.6 mg, 13:1 dr), mp: 89.4 – 92.0 °C.  $[\alpha]_{\text{D}}^{25}$ : +85 ( $c = 1.0$ ,  $\text{CHCl}_3$ ). HPLC analysis of the product: Daicel CHIRALPAK IE-3 column; 10%  $i$ PrOH in hexanes; 1.0 mL/min; retention times: 13.149

min (minor), 14.72 min (major). 78% ee.  $^1\text{H}$  NMR (500 MHz,  $\text{CDCl}_3$ ):  $\delta$  7.60 – 7.55 (m, 2H), 7.50 – 7.45 (m, 3H), 7.29 (s, 5H), 7.05 (tt,  $J = 7.4, 1.2$  Hz, 1H), 6.87 (t,  $J = 7.8$  Hz, 2H), 6.54 – 6.49 (m, 2H), 6.46 (d,  $J = 1.7$  Hz, 1H), 5.75 (d,  $J = 1.9$  Hz, 1H), 4.76 – 4.68 (m, 1H), 4.59 (d,  $J = 1.6$  Hz, 2H), 4.45 – 4.43 (m, 1H), 3.79 (s, 3H).  $^{13}\text{C}$  NMR (126 MHz,  $\text{CDCl}_3$ ):  $\delta$  175.3, 169.9, 167.6, 139.9, 136.4, 135.7, 135.4, 134.1, 132.1, 131.6, 129.6, 129.3, 128.8, 128.7, 128.54, 128.50, 128.1, 128.0, 127.8, 52.4, 45.63, 45.58, 42.6. HRMS (CI $^+$ ) Calcd for  $\text{C}_{29}\text{H}_{25}\text{ClNO}_4^+$   $[\text{M} + \text{H}]^+$ : 486.1472, Found: 486.1464.

**Methyl 2-((*S*)-((*R*)-1-benzyl-4-((*E*)-4-bromobenzylidene)-2,5-dioxopyrrolidin-3-yl)(phenyl)methyl)acrylate (3na)**

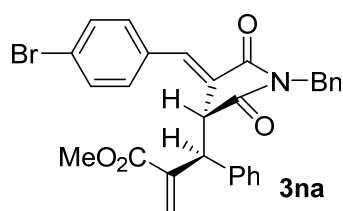

white solid, 92% yield (24.4 mg, 11:1 dr), mp: 90.4 – 93.4 °C.  $[\alpha]_{\text{D}}^{25}$ : +98 ( $c = 1.0$ ,  $\text{CHCl}_3$ ). HPLC analysis of the product: Daicel CHIRALPAK IE-3 column; 10%  $i$ PrOH in hexanes; 1.0 mL/min; retention times: 13.869

min (minor), 15.455 min (major). 79% ee.  $^1\text{H}$  NMR (500 MHz,  $\text{CDCl}_3$ ):  $\delta$  7.68 – 7.62 (m, 2H), 7.54 – 7.48 (m, 2H), 7.45 (d,  $J = 2.3$  Hz, 1H), 7.29 – 7.29 (m, 4H), 7.11 – 7.00 (m, 1H), 6.90 – 6.81 (m, 2H), 6.54 – 6.49 (m, 2H), 6.46 (d,  $J = 1.5$  Hz, 1H), 5.74 (d,  $J = 1.9$  Hz, 1H), 4.74 – 4.69 (m, 1H), 4.59 (d,  $J = 1.9$  Hz, 2H), 4.46 – 4.41 (m, 1H), 3.79 (s, 3H).  $^{13}\text{C}$  NMR (126 MHz,  $\text{CDCl}_3$ ):  $\delta$  175.3, 169.9, 167.6, 139.9, 135.7, 135.4, 134.1, 132.55, 132.52, 131.8, 129.4, 128.8, 128.7, 128.54, 128.50, 128.3,



128.0, 127.8, 124.8, 52.4, 45.57, 45.56, 42.6. **HRMS** (CI<sup>+</sup>) Calcd for C<sub>29</sub>H<sub>25</sub>BrNO<sub>4</sub><sup>+</sup> [M + H]<sup>+</sup>: 530.0967, Found: 530.0956.

**Methyl 2-((S)-((R,E)-1-benzyl-4-(naphthalen-2-ylmethylene)-2,5-dioxopyrrolidin-3-yl)(phenyl)methyl)acrylate (3oa)**

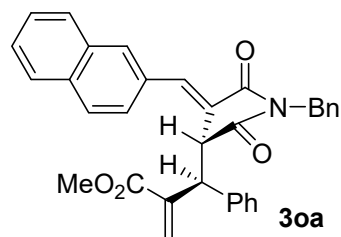

white solid, 93% yield (23.3 mg, 11:1 dr), mp: 81.3 –

82.1 °C. [α]<sub>D</sub><sup>25</sup>: +158 (c = 1.0, CHCl<sub>3</sub>). HPLC analysis of

the product: Daicel CHIRALPAK IE-3 column; 10%

<sup>i</sup>PrOH in hexanes; 1.0 mL/min; retention times: 20.734

min (minor), 24.482 min (major). 85% ee. **<sup>1</sup>H NMR** (500 MHz, CDCl<sub>3</sub>): δ 8.20 (s,

1H), 7.99 – 7.94 (m, 2H), 7.91 – 7.86 (m, 1H), 7.73 – 7.66 (m, 2H), 7.61 – 7.52 (m,

2H), 7.29 (s, 5H), 7.04 (tt, *J* = 7.2, 1.2 Hz, 1H), 6.86 (t, *J* = 7.8 Hz, 2H), 6.56 – 6.44

(m, 3H), 5.80 (d, *J* = 1.9 Hz, 1H), 4.89 (dd, *J* = 4.1, 2.3 Hz, 1H), 4.60 (d, *J* = 5.7 Hz,

3H), 3.76 (s, 3H). **<sup>13</sup>C NMR** (126 MHz, CDCl<sub>3</sub>): δ 175.6, 170.2, 167.6, 140.2, 135.8,

135.54, 135.51, 133.9, 133.4, 131.4, 131.1, 129.3, 129.00, 128.96, 128.8, 128.7,

128.5, 128.4, 127.95, 127.87, 127.8, 127.7, 127.6, 127.0, 126.8, 52.3, 46.0, 45.7, 42.6.

**HRMS** (CI<sup>+</sup>) Calcd for C<sub>33</sub>H<sub>28</sub>NO<sub>4</sub><sup>+</sup> [M + H]<sup>+</sup>: 502.2018, Found: 502.2007.

**Methyl 2-((S)-((R)-4-((E)-benzylidene)-1-(tert-butyl)-2,5-dioxopyrrolidin-3-yl)(p-tolyl)methyl)acrylate (3eb)**

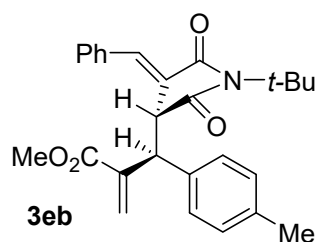

white solid, 91% yield (19.6 mg, 15:1 dr), mp: 57.5 –

59.1 °C. [α]<sub>D</sub><sup>25</sup>: +323 (c = 1.0, CHCl<sub>3</sub>). HPLC analysis of

the product: Daicel CHIRALPAK IE-3 column; 1% <sup>i</sup>PrOH

in hexanes; 1.0 mL/min; retention times: 9.767 min

(minor), 17.787 min (major). 92% ee. **<sup>1</sup>H NMR** (500 MHz,

CDCl<sub>3</sub>): δ 7.60 – 7.55 (m, 2H), 7.51 (d, *J* = 2.3 Hz, 1H), 7.49 – 7.39 (m, 3H), 6.97 (d,

*J* = 7.8 Hz, 2H), 6.77 – 6.71 (m, 2H), 6.55 (d, *J* = 1.8 Hz, 1H), 6.21 (d, *J* = 2.1 Hz,

1H), 4.50 – 4.47 (m, 1H), 4.44 – 4.41 (m, 1H), 3.70 (s, 3H), 2.25 (s, 3H), 1.37 (s, 9H).

**<sup>13</sup>C NMR** (126 MHz, CDCl<sub>3</sub>): δ 176.7, 171.6, 167.4, 140.7, 137.4, 133.9, 133.6,

133.3, 130.4, 130.0, 129.20, 129.18, 128.9, 128.5, 128.1, 58.5, 52.2, 46.4, 46.1, 28.3,

21.1. **HRMS** (CI<sup>+</sup>) Calcd for C<sub>27</sub>H<sub>30</sub>NO<sub>4</sub><sup>+</sup> [M + H]<sup>+</sup>: 432.2175, Found: 432.2164.

**Methyl 2-((S)-((R)-4-((E)-benzylidene)-1-(tert-butyl)-2,5-dioxopyrrolidin-3-yl)(4-**



**methoxyphenyl)methyl)acrylate (3ec)**

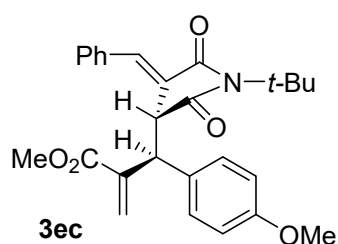

white solid, 94% yield (21.0 mg, 10:1 dr), mp: 58.8 – 60.1 °C.  $[\alpha]_D^{25}$ : +287 (c = 1.0, CHCl<sub>3</sub>). HPLC analysis of the product: Daicel CHIRALPAK IE-3 column; 10% <sup>i</sup>PrOH in hexanes; 1.0 mL/min; retention times: 9.515 min (minor), 11.816 min (major). 93% ee. <sup>1</sup>H NMR (500 MHz, CDCl<sub>3</sub>): δ 7.59 – 7.56 (m, 2H), 7.53 – 7.39 (m, 4H), 6.81 – 6.75 (m, 2H), 6.72 – 6.67 (m, 2H), 6.55 (s, 1H), 6.21 (d, *J* = 2.0 Hz, 1H), 4.50 – 4.46 (m, 1H), 4.43 – 4.39 (m, 1H), 3.73 (s, 3H), 3.70 (s, 3H), 1.38 (s, 9H). <sup>13</sup>C NMR (101 MHz, CDCl<sub>3</sub>): δ 176.7, 171.6, 167.4, 159.2, 140.9, 133.9, 133.7, 130.4, 130.09, 130.08, 129.2, 128.6, 128.4, 128.0, 113.9, 58.5, 55.3, 52.3, 46.5, 45.7, 28.4. HRMS (CI+) Calcd for C<sub>27</sub>H<sub>30</sub>NO<sub>5</sub><sup>+</sup> [M + H]<sup>+</sup>: 448.2124, Found: 448.2114.

**Methyl 2-((R)-((S)-4-((E)-benzylidene)-1-(tert-butyl)-2,5-dioxopyrrolidin-3-yl)(4-fluorophenyl)methyl)acrylate (3ed)**

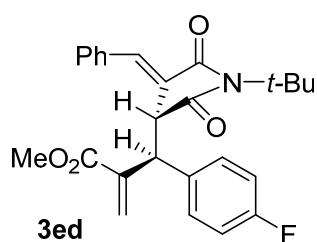

white solid, 90% yield (19.6 mg, 10:1 dr), mp: 64.7 – 68.1 °C.  $[\alpha]_D^{25}$ : +246 (c = 1.0, CHCl<sub>3</sub>). HPLC analysis of the product: Daicel CHIRALPAK IE-3 column; 10% <sup>i</sup>PrOH in hexanes; 1.0 mL/min; retention times: 6.348 min (minor), 7.008 min (major). 94% ee. <sup>1</sup>H NMR (400 MHz, CDCl<sub>3</sub>): δ 7.59 – 7.52 (m, 3H), 7.51 – 7.38 (m, 3H), 6.90 – 6.83 (m, 4H), 6.59 (d, *J* = 1.1 Hz, 1H), 6.29 (d, *J* = 1.8 Hz, 1H), 4.48 (t, *J* = 2.5 Hz, 1H), 4.45 – 4.43 (m, 1H), 3.68 (s, 3H), 1.37 (s, 9H). <sup>13</sup>C NMR (101 MHz, CDCl<sub>3</sub>): δ 176.4, 171.3, 167.1, 162.4 (d, *J* = 247.7 Hz), 140.5, 133.9, 133.7, 132.2 (d, *J* = 3.3 Hz), 130.65, 130.57, 130.4, 130.2, 129.3, 128.3 (d, *J* = 7.9 Hz), 115.4 (d, *J* = 21.4 Hz), 58.6, 52.3, 46.3, 45.7, 28.3. <sup>19</sup>F NMR (376 MHz, CDCl<sub>3</sub>): δ -114.7. HRMS (CI+) Calcd for C<sub>26</sub>H<sub>27</sub>FNO<sub>4</sub><sup>+</sup> [M + H]<sup>+</sup>: 436.1924, Found: 436.1914.

**Methyl 2-((S)-((R)-4-((E)-benzylidene)-1-(tert-butyl)-2,5-dioxopyrrolidin-3-yl)(4-chlorophenyl)methyl)acrylate (3ee)**

white solid, 92% yield (20.7 mg, 11:1 dr), mp: 72.7 – 73.8 °C.  $[\alpha]_D^{25}$ : +287 (c = 1.0, CHCl<sub>3</sub>). HPLC analysis of the product: Daicel CHIRALPAK IE-3 column; 10%



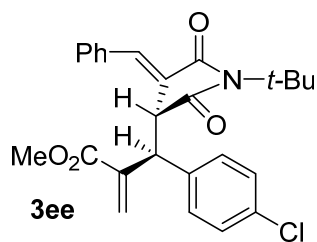

*i*PrOH in hexanes; 1.0 mL/min; retention times: 6.412 min (minor), 7.338 min (major). 93% ee. **<sup>1</sup>H NMR** (500 MHz, CDCl<sub>3</sub>):  $\delta$  7.56 – 7.53 (m, 3H), 7.50 – 7.41 (m, 4H), 7.16 (d,  $J$  = 8.4 Hz, 2H), 6.81 (d,  $J$  = 8.4 Hz, 2H), 6.60 (s, 1H), 6.26 (d,  $J$  = 1.7 Hz, 1H), 4.51 – 4.47 (m, 1H), 4.45 – 4.40 (m, 1H), 3.69 (s, 3H), 1.38 (s, 9H). **<sup>13</sup>C NMR** (126 MHz, CDCl<sub>3</sub>):  $\delta$  176.2, 171.2, 167.0, 140.1, 135.0, 133.9, 133.7, 133.6, 130.3, 130.2, 130.1, 130.0, 129.2, 128.6, 128.0, 58.6, 52.2, 46.0, 45.7, 28.2. **HRMS** (CI<sup>+</sup>) Calcd for C<sub>26</sub>H<sub>27</sub>ClNO<sub>4</sub><sup>+</sup> [M + H]<sup>+</sup>: 452.1629, Found: 452.1620.

**Methyl 2-((*S*)-((*R*)-4-((*E*)-benzylidene)-1-(tert-butyl)-2,5-dioxopyrrolidin-3-yl)(naphthalen-2-yl)methyl)acrylate (3ef)**

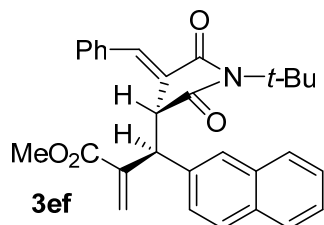

white solid, 91% yield (21.0 mg, 14:1 dr), mp: 106.3 – 108.1 °C. [ $\alpha$ ]<sub>D</sub><sup>25</sup>: +424 (c = 1.0, CHCl<sub>3</sub>). HPLC analysis of the product: Daicel CHIRALPAK IE-3 column; 10% *i*PrOH in hexanes; 1.0 mL/min; retention times: 8.056 min (minor), 9.841 min (major). 95% ee. **<sup>1</sup>H NMR** (400 MHz, CDCl<sub>3</sub>):  $\delta$  7.78 – 7.72 (m, 1H), 7.71 – 7.33 (m, 11H), 6.99 (dd,  $J$  = 8.5, 1.8 Hz, 1H), 6.63 – 6.56 (m, 1H), 6.21 (d,  $J$  = 1.8 Hz, 1H), 4.65 – 4.63 (m, 1H), 4.62 – 4.61 (m, 1H), 3.71 (s, 3H), 1.27 (s, 9H). **<sup>13</sup>C NMR** (101 MHz, CDCl<sub>3</sub>):  $\delta$  176.7, 171.3, 167.4, 140.7, 134.0, 133.9, 133.3, 132.9, 130.4, 130.1, 129.3, 128.9, 128.4, 128.3, 128.2, 128.0, 127.9, 127.7, 127.0, 126.3, 126.1, 58.5, 52.3, 46.5, 46.3, 28.2. **HRMS** (CI<sup>+</sup>) Calcd for C<sub>30</sub>H<sub>30</sub>NO<sub>4</sub><sup>+</sup> [M + H]<sup>+</sup>: 468.2175, Found: 468.2166.

**Methyl 2-((*R*)-((*R*)-4-((*E*)-benzylidene)-1-(tert-butyl)-2,5-dioxopyrrolidin-3-yl)(thiophen-2-yl)methyl)acrylate (3eg)**

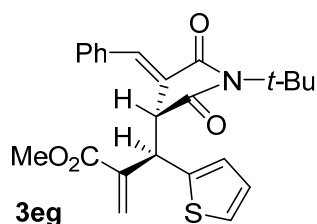

white solid, 91% yield (19.2 mg, >20:1 dr), mp: 76.2 – 79.3 °C. [ $\alpha$ ]<sub>D</sub><sup>25</sup>: +190 (c = 1.0, CHCl<sub>3</sub>). HPLC analysis of the product: Daicel CHIRALPAK IE-3 column; 5% *i*PrOH in hexanes; 1.0 mL/min; retention times: 12.029 min (minor), 13.145 min (major). 92% ee. **<sup>1</sup>H NMR** (500 MHz, CDCl<sub>3</sub>):  $\delta$  7.61 – 7.54 (m, 3H), 7.50 – 7.43 (m, 2H), 7.45 – 7.39 (m, 1H), 7.10 (dd,  $J$  = 5.2, 1.2 Hz, 1H), 6.86 –



6.82 (m, 1H), 6.56 – 6.51 (m, 2H), 6.20 (d,  $J = 1.7$  Hz, 1H), 4.78 – 4.72 (m, 1H), 4.54 – 4.46 (m, 1H), 3.75 (s, 3H), 1.48 (s, 9H).  $^{13}\text{C}$  NMR (126 MHz,  $\text{CDCl}_3$ ):  $\delta$  176.3, 171.5, 167.2, 140.3, 138.5, 134.3, 133.8, 130.3, 129.7, 129.2, 128.5, 128.0, 126.9, 124.9, 58.7, 52.4, 46.4, 41.1, 28.4. HRMS (CI+) Calcd for  $\text{C}_{24}\text{H}_{26}\text{NO}_4\text{S}^+$  [ $\text{M} + \text{H}$ ] $^+$ : 424.1583, Found: 424.1576.

**Ethyl 2-((*S*)-((*R*)-4-((*E*)-benzylidene)-1-(tert-butyl)-2,5-dioxopyrrolidin-3-yl)(phenyl)methyl)acrylate (3eh)**

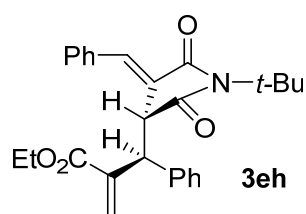

white solid, 88% yield (19.0 mg, 7:1 dr), mp: 63.2 – 64.1 °C.  $[\alpha]_{\text{D}}^{25}$ : +247 ( $c = 1.0$ ,  $\text{CHCl}_3$ ). HPLC analysis of the product: Daicel CHIRALPAK IE-3 column; 10%  $i$ PrOH in hexanes; 1.0 mL/min; retention times: 6.883 min (minor),

7.641 min (major). 91% ee.  $^1\text{H}$  NMR (500 MHz,  $\text{CDCl}_3$ ):  $\delta$  7.60 – 7.52 (m, 3H), 7.49 – 7.36 (m, 4H), 7.20 – 7.14 (m, 3H), 6.89 (dd,  $J = 7.1, 2.5$  Hz, 2H), 6.61 (s, 1H), 6.31 (d,  $J = 1.7$  Hz, 1H), 4.48 (t,  $J = 2.4$  Hz, 1H), 4.45 (d,  $J = 2.7$  Hz, 1H), 4.15 – 4.07 (m, 2H), 1.34 (s, 9H), 1.14 (t,  $J = 7.1$  Hz, 3H).  $^{13}\text{C}$  NMR (126 MHz,  $\text{CDCl}_3$ ):  $\delta$  176.5, 171.4, 166.8, 140.9, 136.6, 133.9, 133.6, 130.4, 130.1, 129.2, 129.0, 128.6, 128.5, 128.0, 127.7, 61.0, 58.5, 46.5, 46.4, 28.3, 14.1. HRMS (CI+) Calcd for  $\text{C}_{27}\text{H}_{30}\text{NO}_4^+$  [ $\text{M} + \text{H}$ ] $^+$ : 432.2175, Found: 432.2165.

**Benzyl 2-((*S*)-((*R*)-4-((*E*)-benzylidene)-1-(tert-butyl)-2,5-dioxopyrrolidin-3-yl)(phenyl)methyl)acrylate (3ei)**

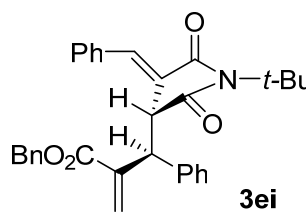

white solid, 94% yield (23.2 mg, 15:1 dr), mp: 65.5 – 68.7 °C.  $[\alpha]_{\text{D}}^{25}$ : +232 ( $c = 1.0$ ,  $\text{CHCl}_3$ ). HPLC analysis of the product: Daicel CHIRALPAK IE-3 column; 10%  $i$ PrOH in hexanes; 1.0 mL/min; retention times: 8.376 min

(minor), 8.871 min (major). 92% ee.  $^1\text{H}$  NMR (500 MHz,  $\text{CDCl}_3$ ):  $\delta$  7.56 – 7.50 (m, 3H), 7.43 – 7.37 (m, 3H), 7.29 – 7.26 (m, 3H), 7.20 – 7.15 (m, 3H), 7.14 – 7.09 (m, 2H), 6.92 – 6.87 (m, 2H), 6.69 (s, 1H), 6.43 (d,  $J = 1.7$  Hz, 1H), 5.14 – 5.03 (m, 2H), 4.49 – 4.42 (m, 2H), 1.32 (s, 9H).  $^{13}\text{C}$  NMR (126 MHz,  $\text{CDCl}_3$ ):  $\delta$  176.4, 171.4, 166.5, 140.6, 136.4, 135.9, 133.7, 133.6, 130.4, 130.1, 129.3, 129.0, 128.8, 128.7, 128.55, 128.53, 128.1, 127.9, 127.8, 66.7, 58.5, 46.6, 46.5, 28.2. HRMS (CI+) Calcd



for  $C_{32}H_{32}NO_4^+$   $[M + H]^+$ : 494.2331, Found: 494.2321.

**Butyl 2-((*S*)-((*R*)-4-((*E*)-benzylidene)-1-(*tert*-butyl)-2,5-dioxopyrrolidin-3-yl)(phenyl)methyl)acrylate (3ej)**

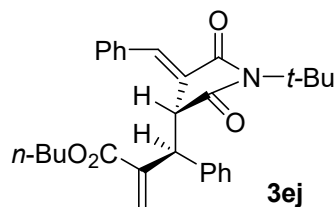

white solid, 91% yield (20.9 mg, 7:1 dr), mp: 52.0 – 54.4 °C.  $[\alpha]_D^{25}$ : +280 ( $c = 1.0$ ,  $CHCl_3$ ). HPLC analysis of the product: Daicel CHIRALPAK IE-3 column; 5%  $i$ PrOH in hexanes; 1.0 mL/min; retention times: 9.202 min

(minor), 10.105 min (major). 93% ee.  $^1H$  NMR (500 MHz,  $CDCl_3$ ):  $\delta$  7.58 – 7.53 (m, 3H), 7.48 – 7.40 (m, 3H), 7.21 – 7.14 (m, 3H), 6.92 – 6.87 (m, 2H), 6.63 (s, 1H), 6.42 – 6.37 (m, 1H), 4.47 – 4.41 (m, 2H), 4.06 – 3.99 (m, 2H), 1.48 – 1.42 (m, 2H), 1.32 (s, 9H), 1.21 – 1.12 (m, 2H), 0.81 (t,  $J = 7.4$  Hz, 3H).  $^{13}C$  NMR (126 MHz,  $CDCl_3$ ):  $\delta$  176.5, 171.4, 166.8, 140.9, 136.6, 133.8, 133.6, 130.4, 130.1, 129.3, 129.0, 128.7, 128.5, 128.1, 127.7, 64.9, 58.5, 46.7, 46.5, 30.6, 28.3, 19.1, 13.8. HRMS (CI+) Calcd for  $C_{29}H_{34}NO_4^+$   $[M + H]^+$ : 460.2488, Found: 460.2480.

**Isobutyl 2-((*S*)-((*R*)-4-((*E*)-benzylidene)-1-(*tert*-butyl)-2,5-dioxopyrrolidin-3-yl)(phenyl)methyl)acrylate (3ek)**

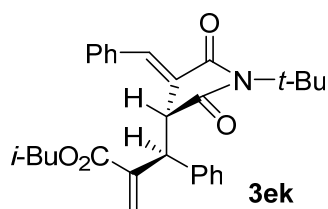

white solid, 91% yield (20.9 mg, 8:1 dr), mp: 53.1 – 55.5 °C.  $[\alpha]_D^{25}$ : +330 ( $c = 1.0$ ,  $CHCl_3$ ). HPLC analysis of the product: Daicel CHIRALPAK IE-3 column; 5%  $i$ PrOH in hexanes; 1.0 mL/min; retention times: 8.803 min

(minor), 9.844 min (major). 92% ee.  $^1H$  NMR (500 MHz,  $CDCl_3$ ):  $\delta$  7.59 – 7.52 (m, 3H), 7.49 – 7.37 (m, 3H), 7.21 – 7.12 (m, 3H), 6.95 – 6.88 (m, 2H), 6.66 (d,  $J = 1.0$  Hz, 1H), 6.44 (d,  $J = 1.2$  Hz, 1H), 4.44 (d,  $J = 1.7$  Hz, 2H), 3.84 – 3.71 (m, 2H), 1.76 (hept,  $J = 13.3, 6.7$  Hz, 1H), 1.30 (s, 9H), 0.73 (d,  $J = 6.7$  Hz, 6H).  $^{13}C$  NMR (126 MHz,  $CDCl_3$ ):  $\delta$  176.4, 171.4, 166.7, 140.9, 136.6, 133.8, 133.6, 130.4, 130.1, 129.3, 129.0, 128.9, 128.8, 128.5, 128.2, 127.7, 71.1, 58.5, 46.7, 28.2, 27.7, 19.0. HRMS (CI+) Calcd for  $C_{29}H_{34}NO_4^+$   $[M + H]^+$ : 460.2488, Found: 460.2481.



## IV. Scale-up of the allylic alkylation

Scale -up reaction:

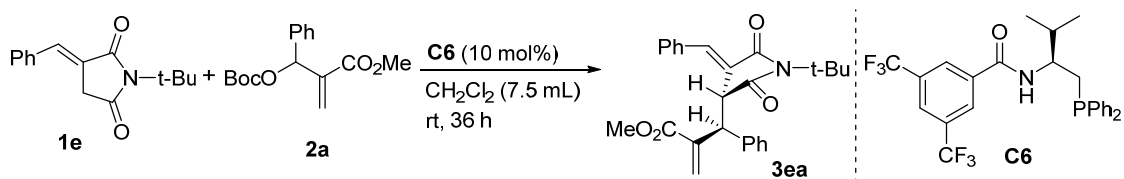

To a solution of DCM (7.5 mL) were added (*E*)-3-benzylidene-1-(tert-butyl)pyrrolidine-2,5-dione **1e** (122mg, 1equiv, 0.5 mmol), MBH carbonate **2a** (175mg, 1.2 equiv, 0.6 mmol) and catalyst **C6** (25mg, 10 mol%, 0.05 mmol). The reaction mixture was stirred at r.t. for 36h. Then the mixture was purified by silica gel column chromatography (eluent: PE/EA = 2:1) to yield the desired product **3ea** in 92% yield (196 mg, 94% ee, dr: 14:1).



## V. Determination of the Stereochemistry

The absolute stereochemistry of products **3la** was determined by X-ray diffraction (CCDC 2244711 for **3la**). The stereochemistry of other products was assumed by analogy.

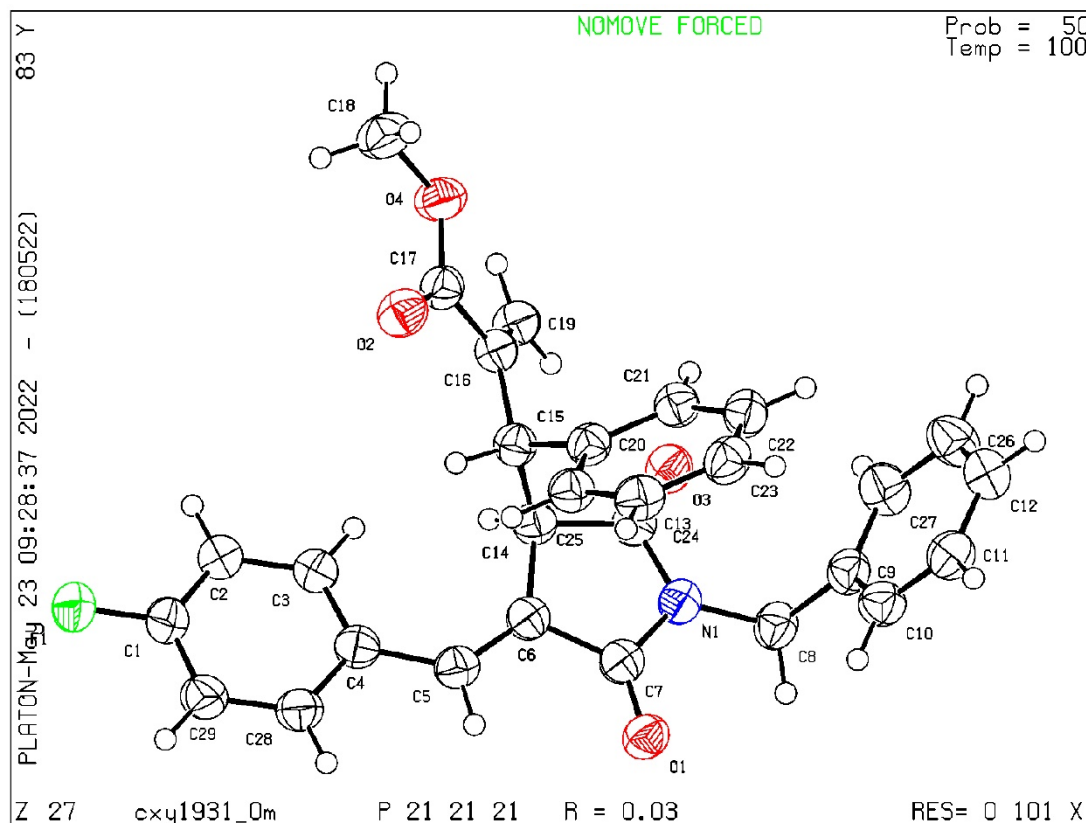



**Table S1. Crystal data and structure refinement for 3la.**

|                                                |                                                                |
|------------------------------------------------|----------------------------------------------------------------|
| Identification code                            | cxy1931_0m                                                     |
| Empirical formula                              | C <sub>29</sub> H <sub>24</sub> FNO <sub>4</sub>               |
| Formula weight                                 | 469.49                                                         |
| Temperature/K                                  | 100(2)                                                         |
| Crystal system                                 | orthorhombic                                                   |
| Space group                                    | P2 <sub>1</sub> 2 <sub>1</sub> 2 <sub>1</sub>                  |
| a/Å                                            | 9.0198(3)                                                      |
| b/Å                                            | 13.0367(4)                                                     |
| c/Å                                            | 20.2824(6)                                                     |
| $\alpha/^\circ$                                | 90                                                             |
| $\beta/^\circ$                                 | 90                                                             |
| $\gamma/^\circ$                                | 90                                                             |
| Volume/Å <sup>3</sup>                          | 2384.98(13)                                                    |
| Z                                              | 4                                                              |
| $\rho_{\text{calc}}/\text{cm}^3$               | 1.308                                                          |
| $\mu/\text{mm}^{-1}$                           | 0.756                                                          |
| F(000)                                         | 984.0                                                          |
| Crystal size/mm <sup>3</sup>                   | 0.36 × 0.33 × 0.29                                             |
| Radiation                                      | CuK $\alpha$ ( $\lambda$ = 1.54178)                            |
| 2 $\Theta$ range for data collection/ $^\circ$ | 8.062 to 148.94                                                |
| Index ranges                                   | -11 ≤ h ≤ 10, -15 ≤ k ≤ 16, -22 ≤ l ≤ 24                       |
| Reflections collected                          | 22241                                                          |
| Independent reflections                        | 4844 [ $R_{\text{int}}$ = 0.0403, $R_{\text{sigma}}$ = 0.0250] |
| Data/restraints/parameters                     | 4844/0/318                                                     |
| Goodness-of-fit on F <sup>2</sup>              | 1.056                                                          |
| Final R indexes [ $I \geq 2\sigma(I)$ ]        | $R_1$ = 0.0277, $wR_2$ = 0.0725                                |
| Final R indexes [all data]                     | $R_1$ = 0.0292, $wR_2$ = 0.0737                                |
| Largest diff. peak/hole / e Å <sup>-3</sup>    | 0.14/-0.13                                                     |
| Flack parameter                                | 0.01(5)                                                        |



## VI. Copies of NMR of substrates

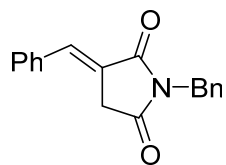

**1a**

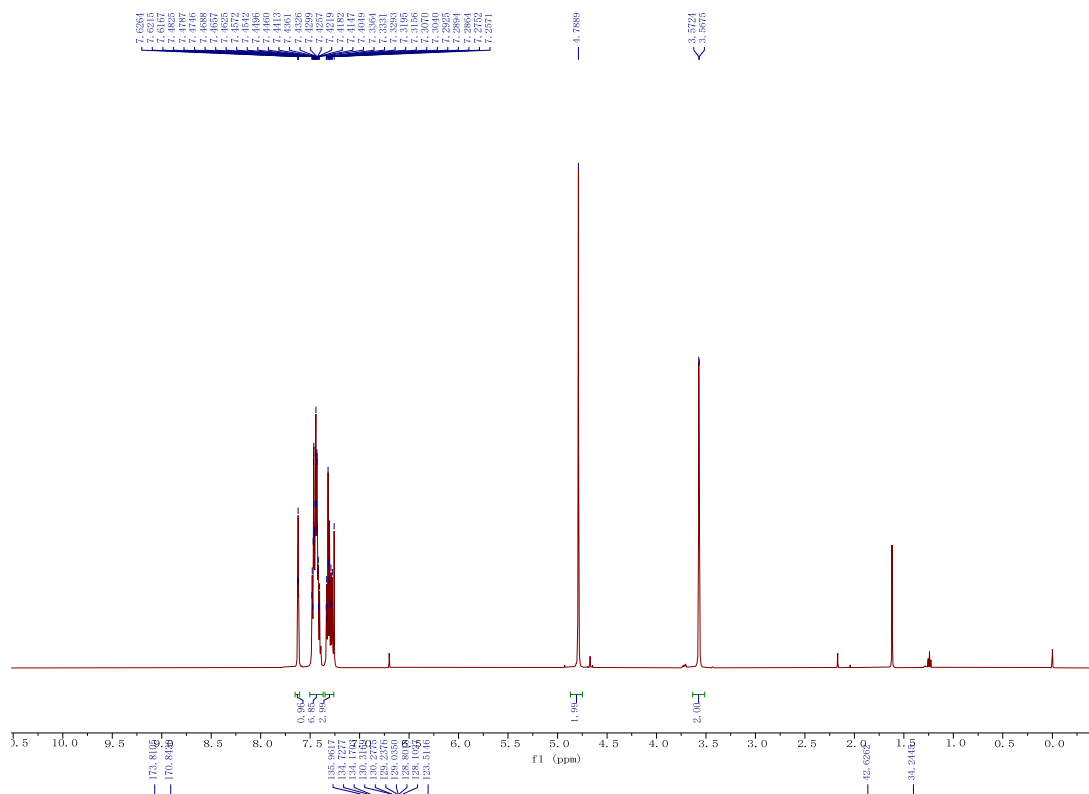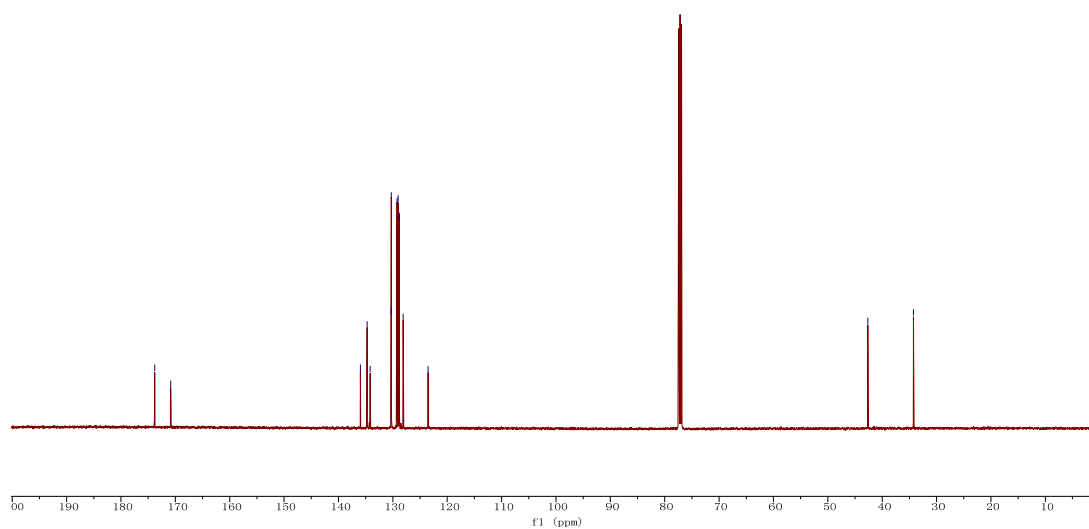



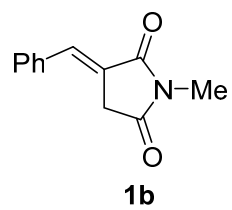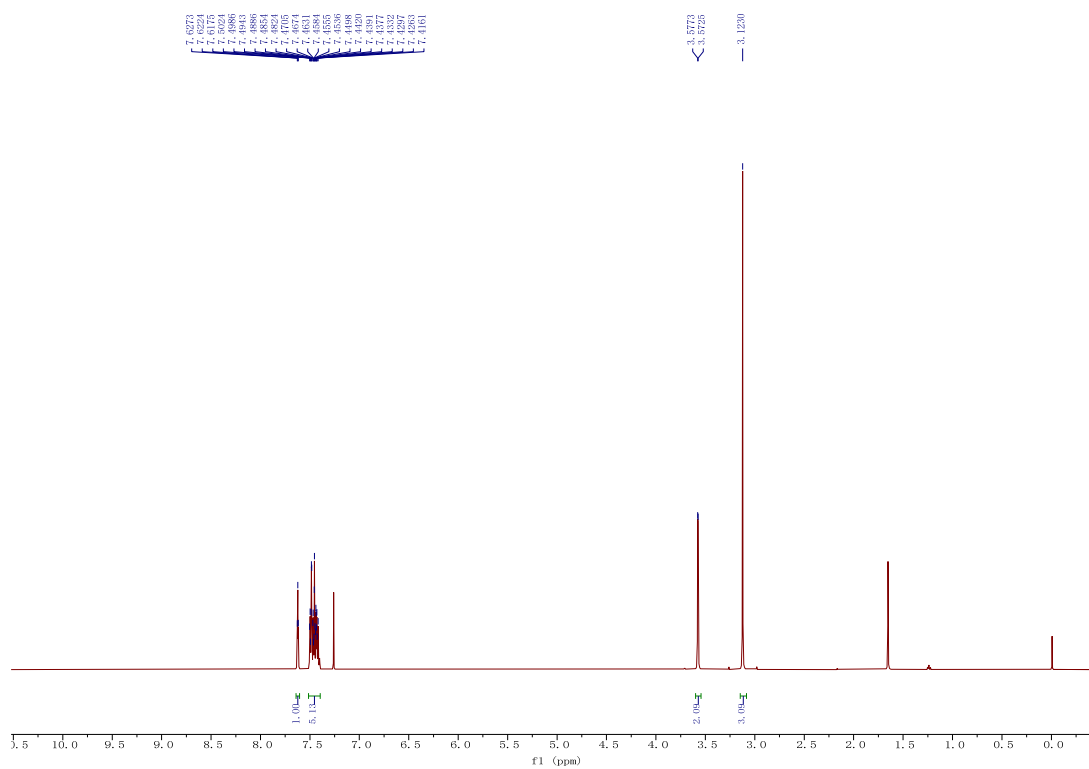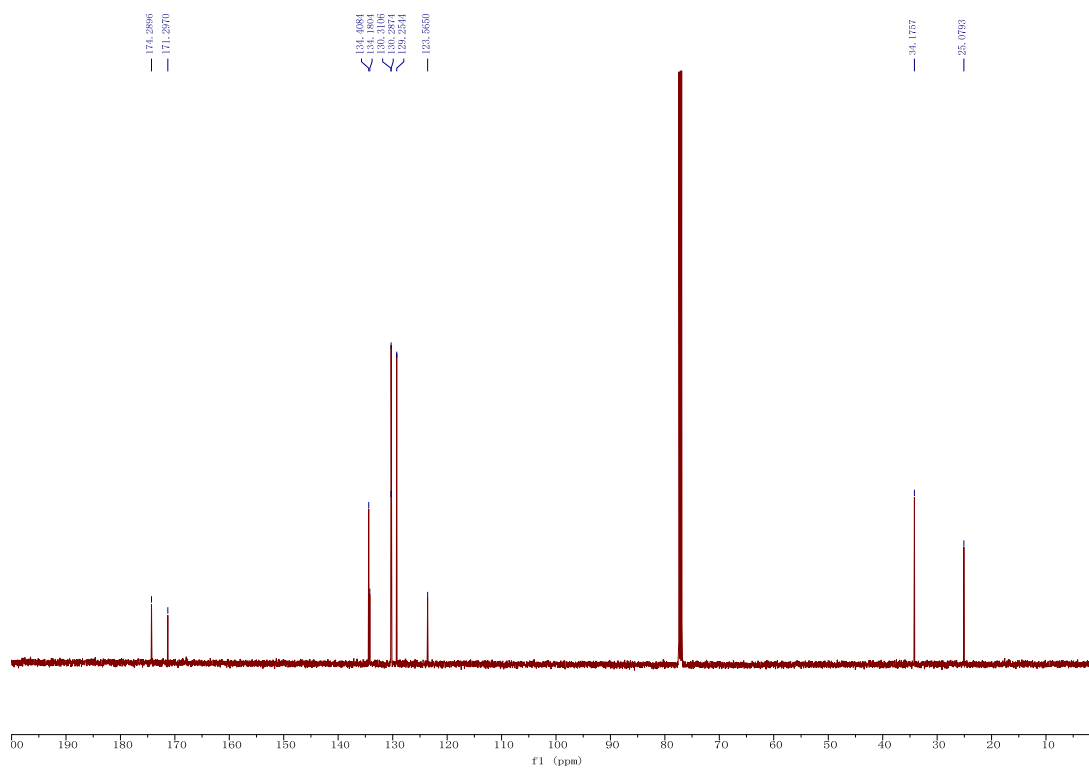



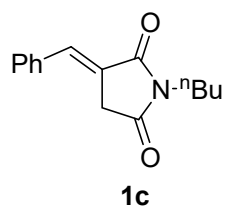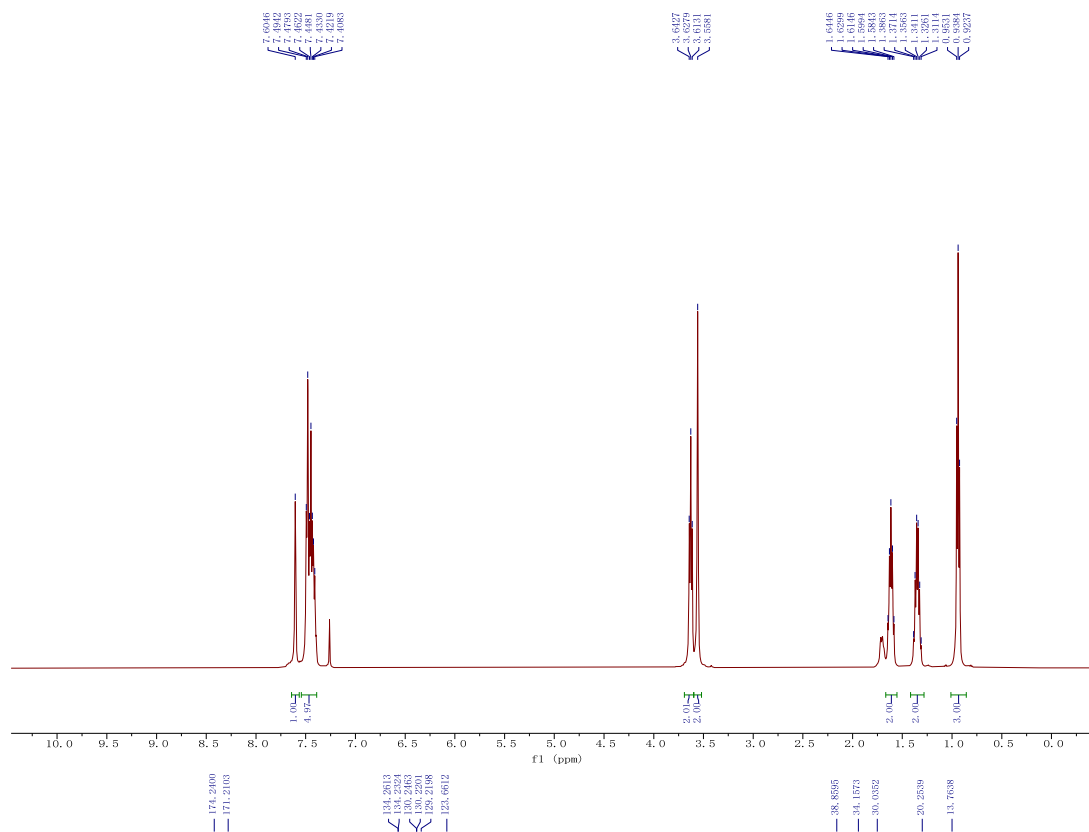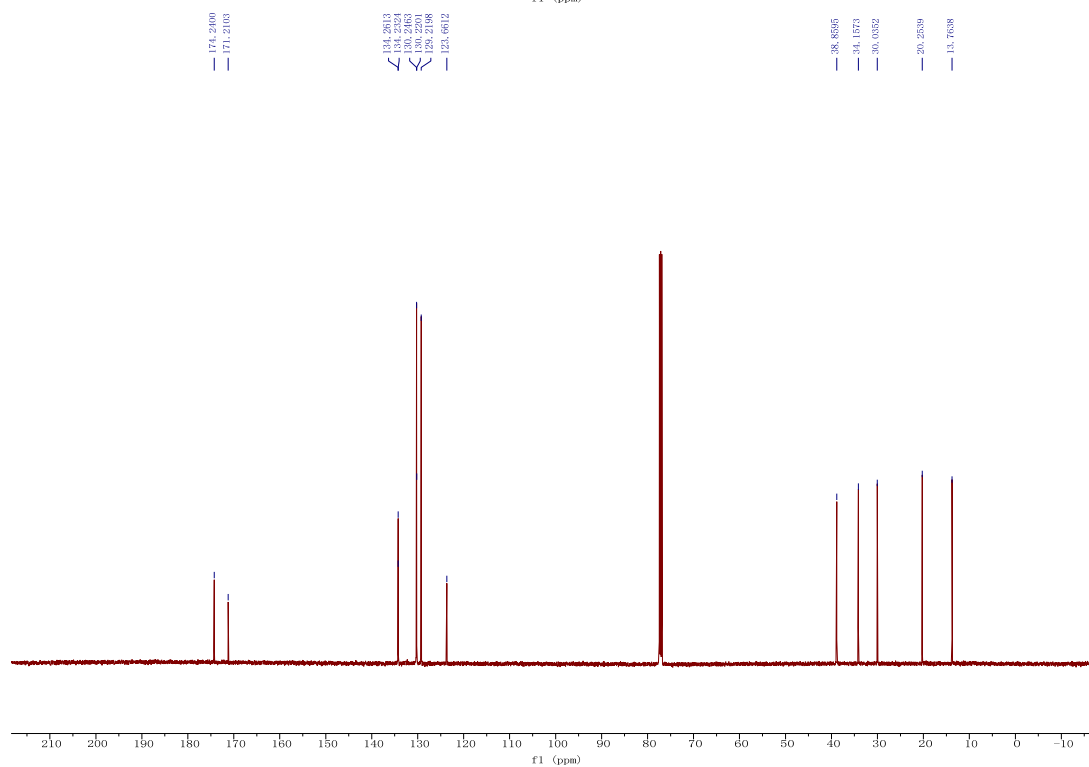



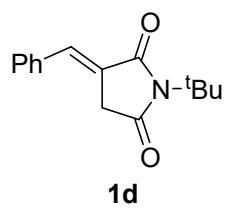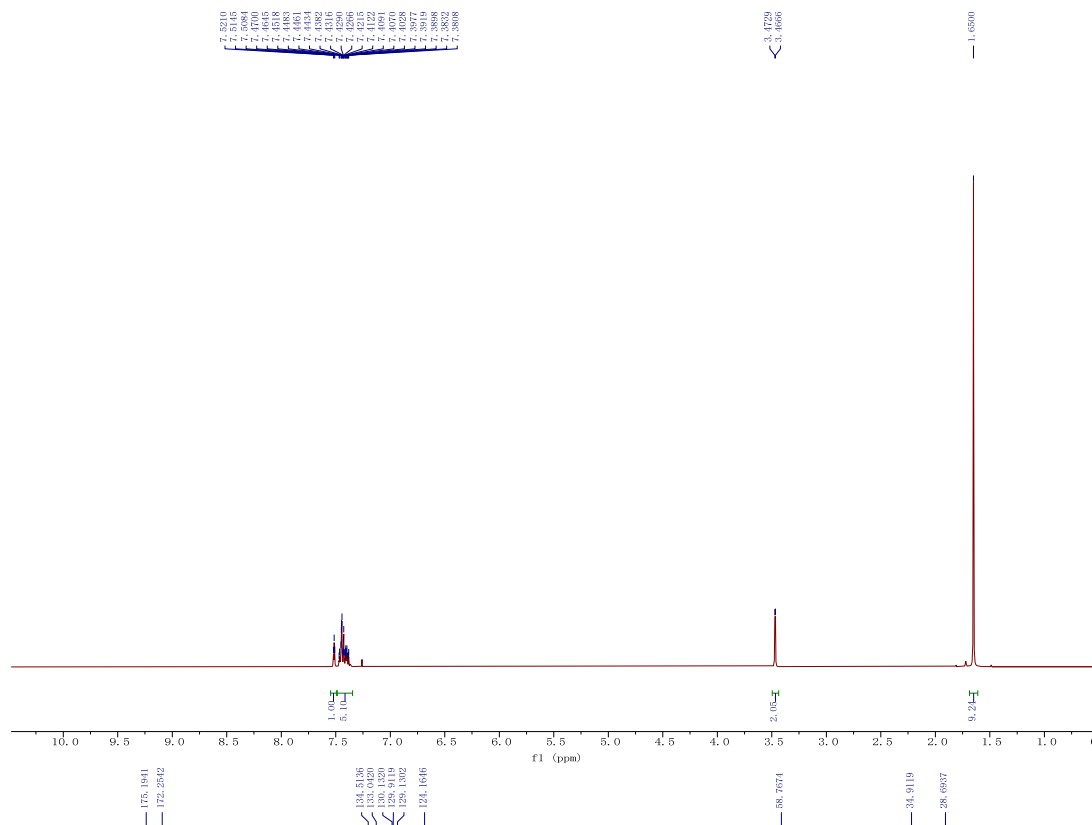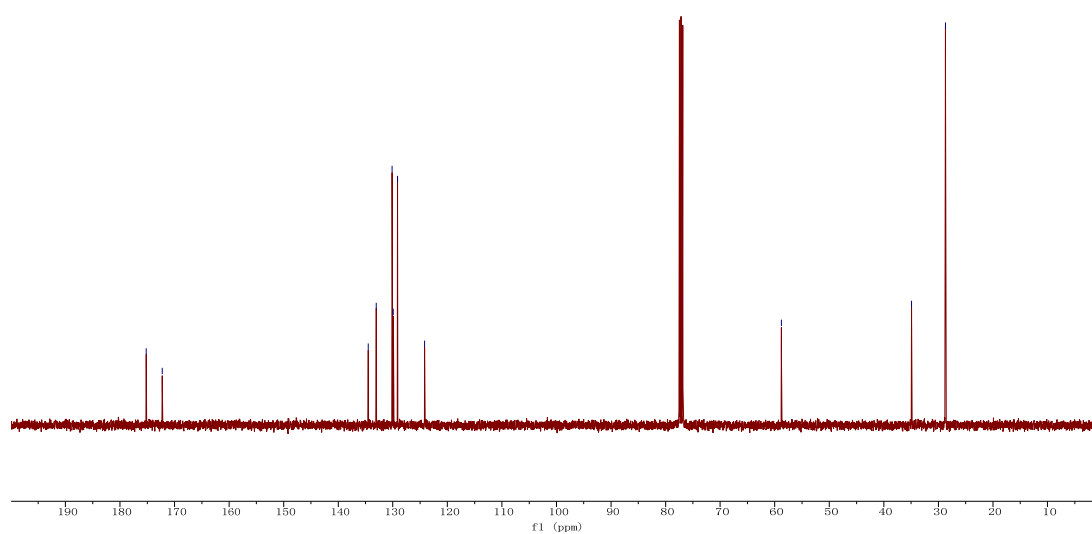



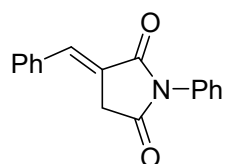

1e

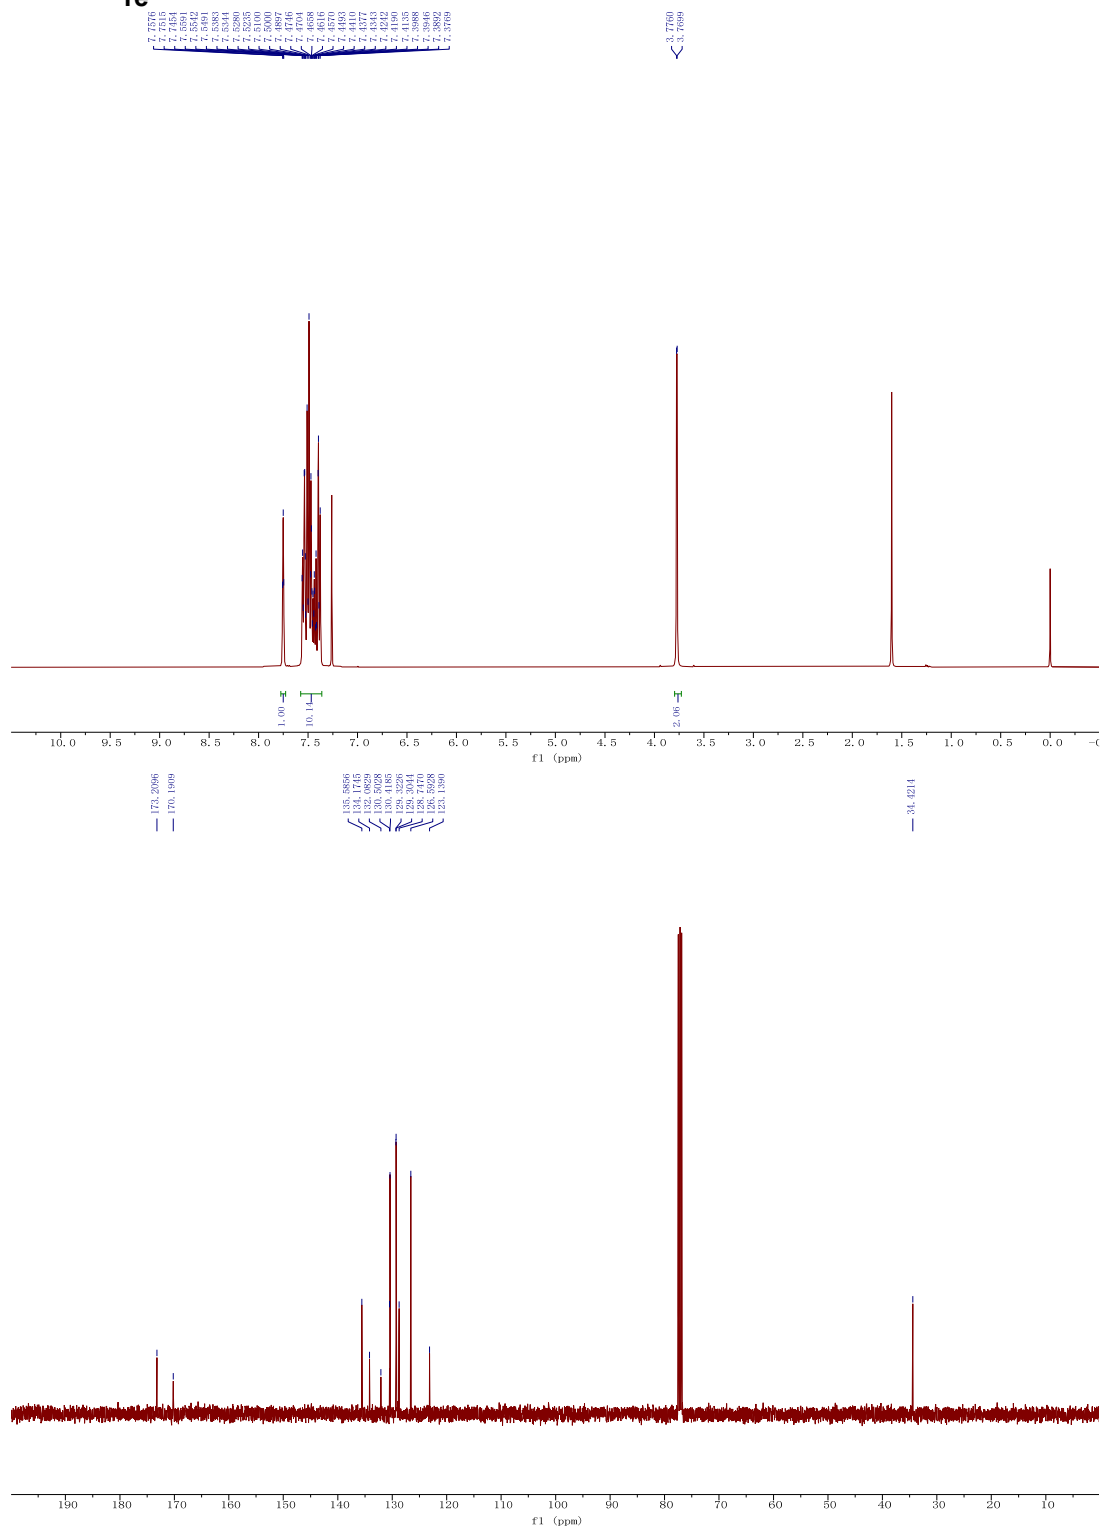



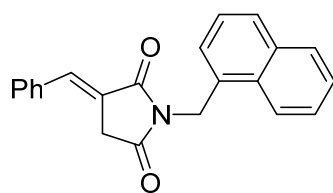

**1f**

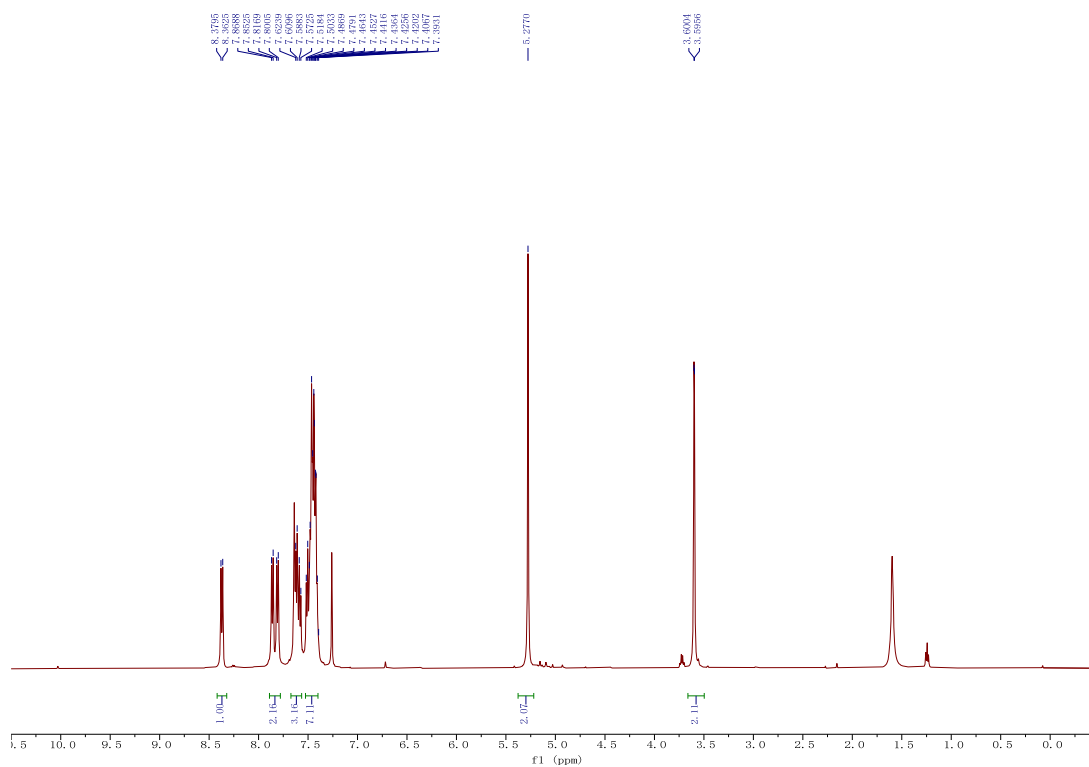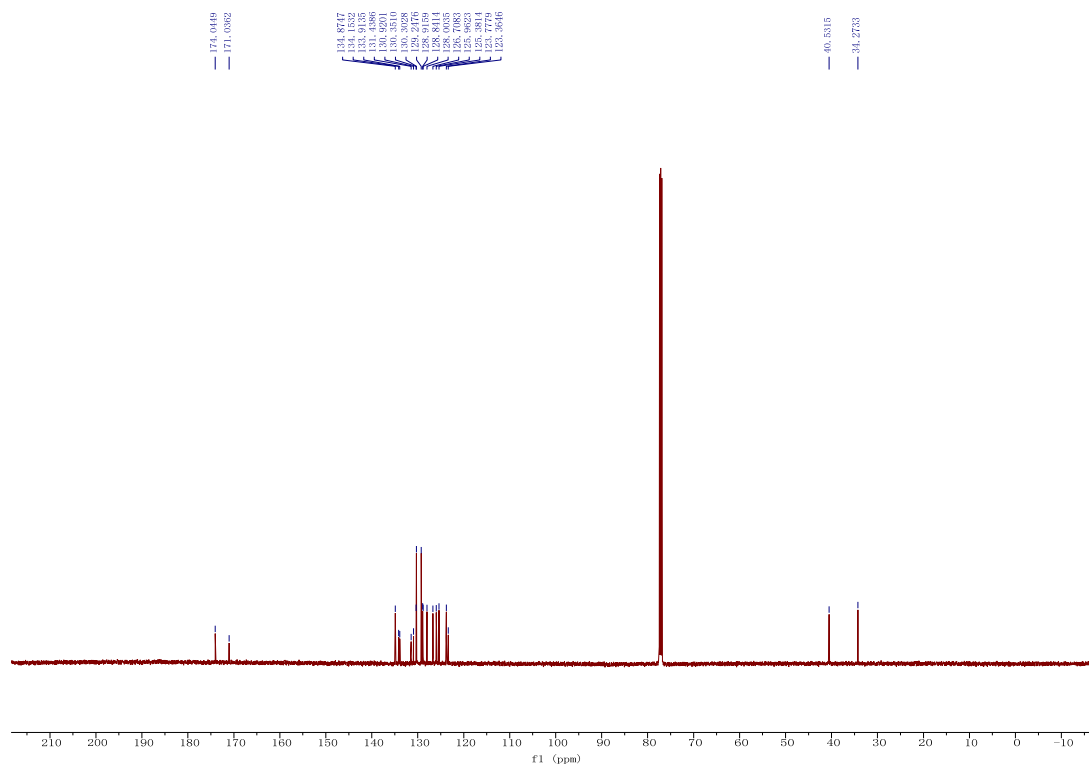



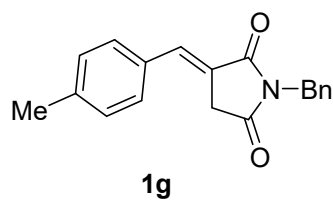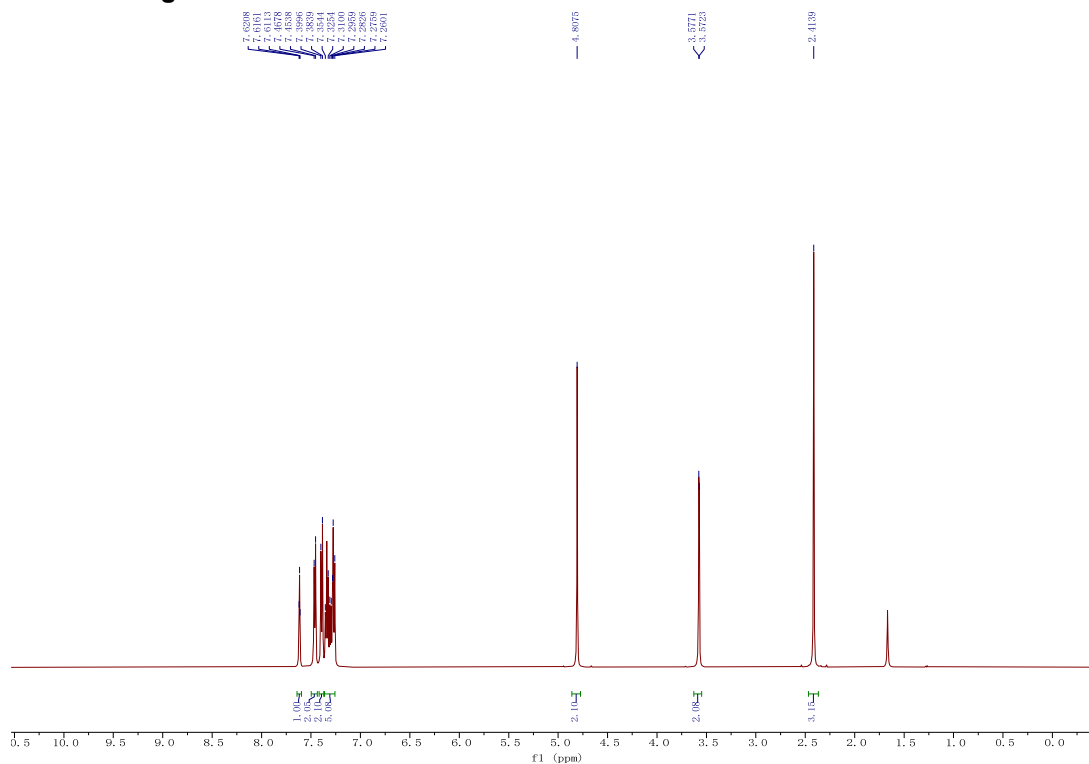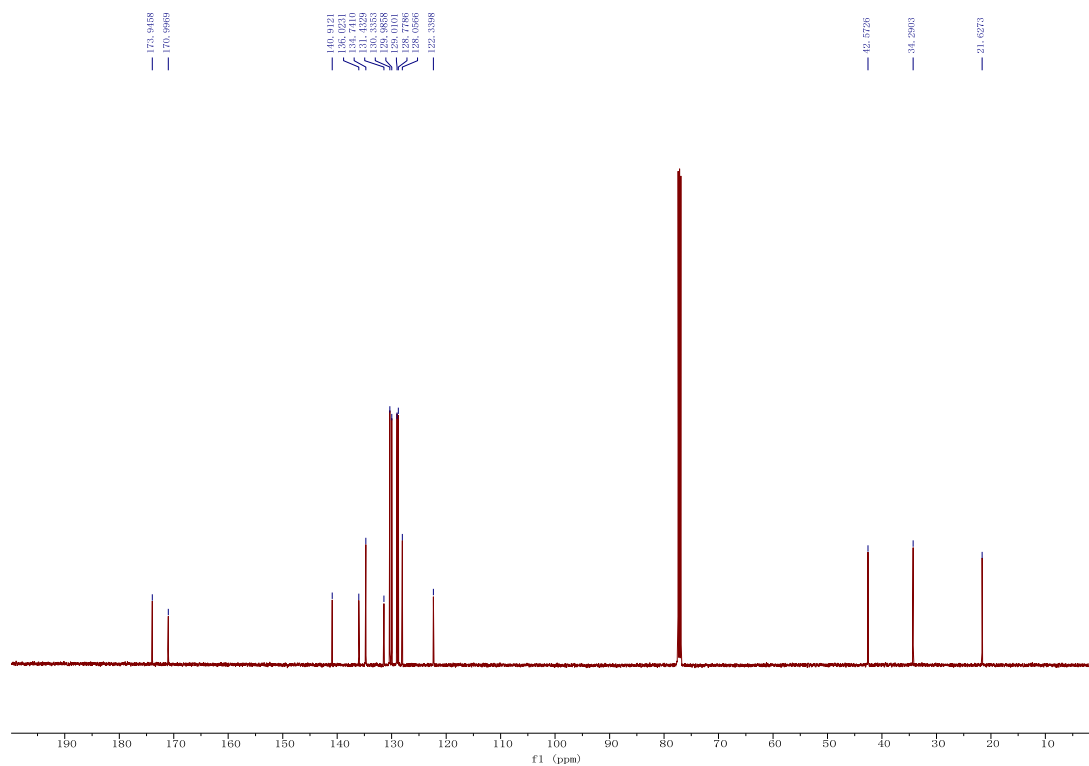



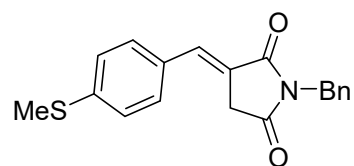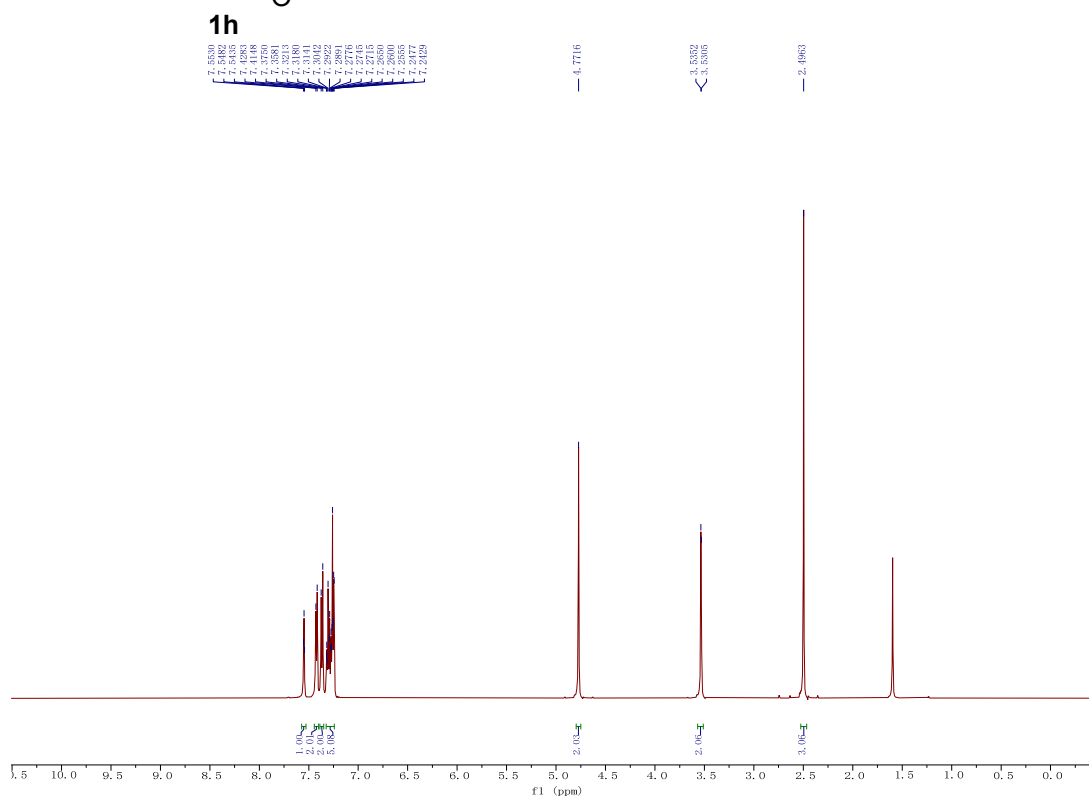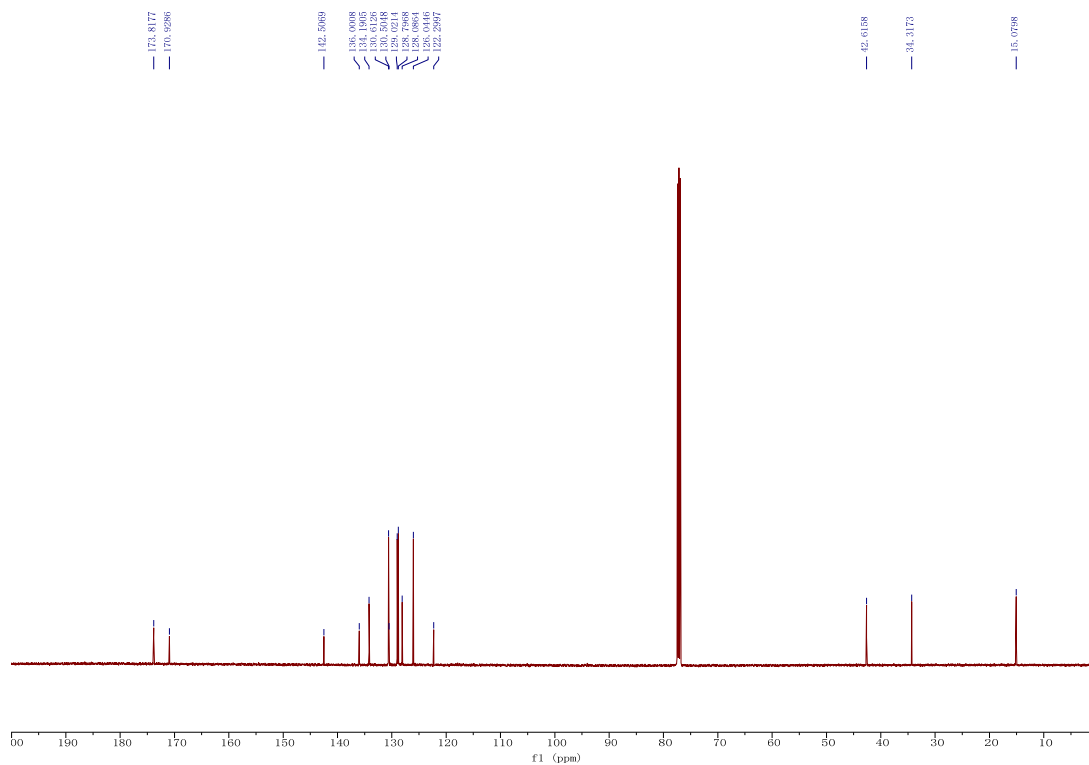



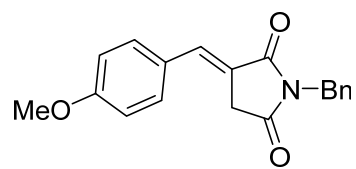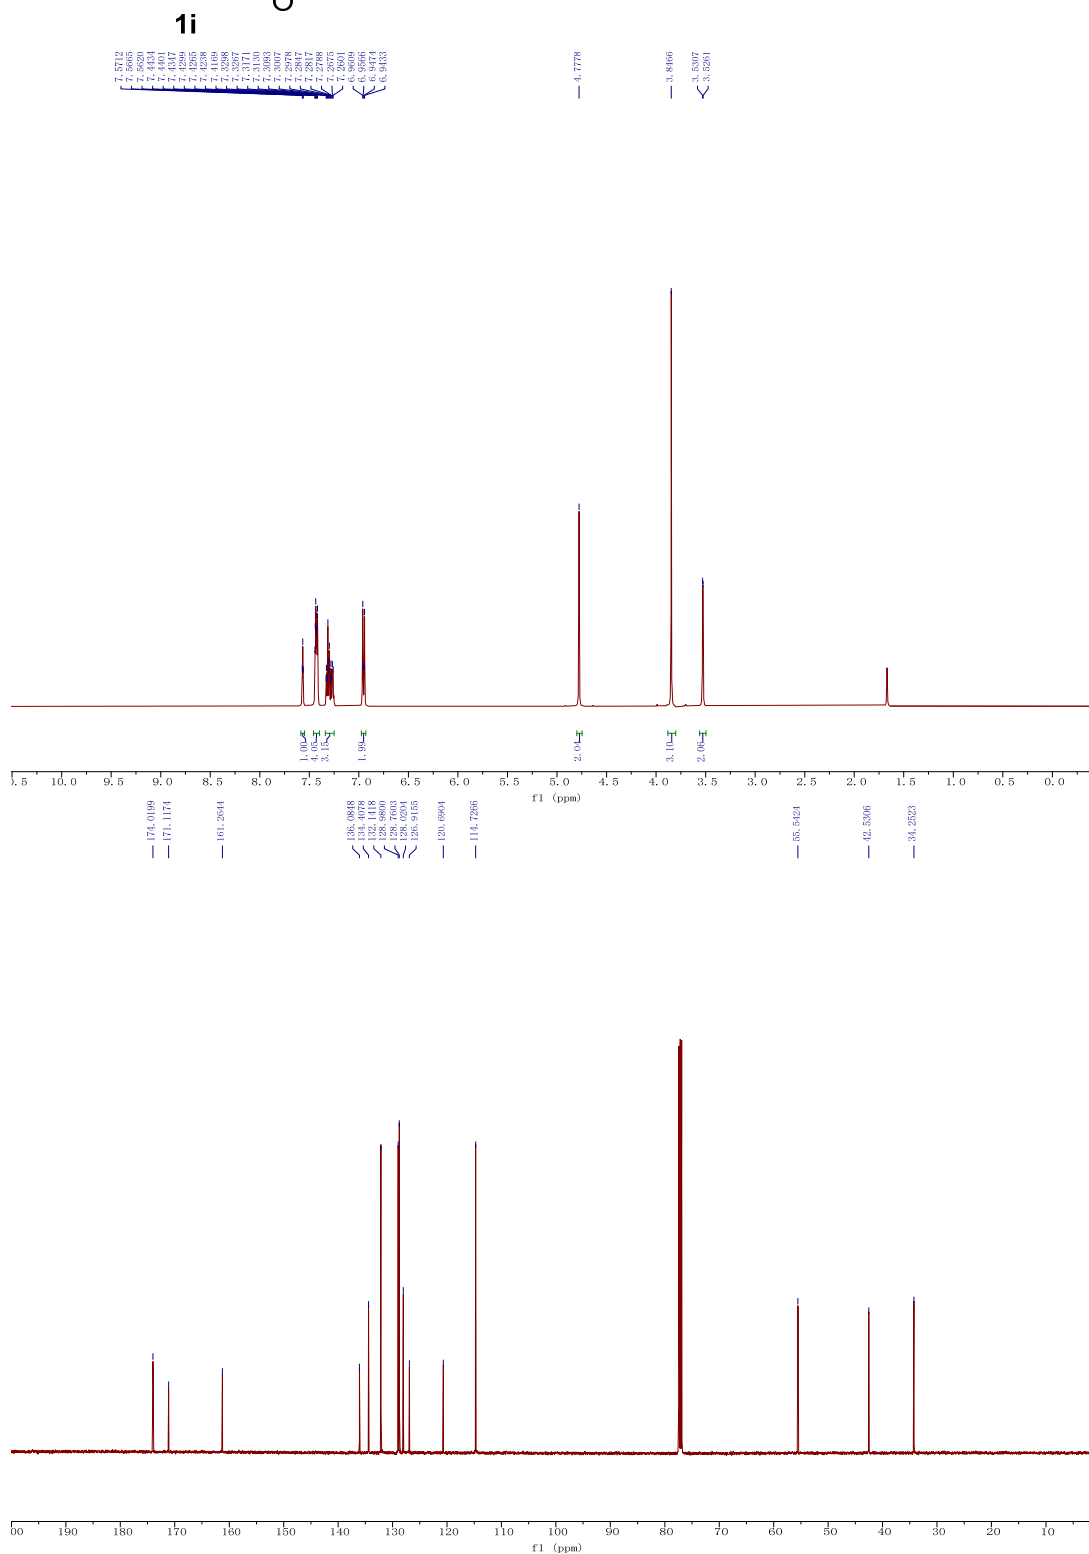



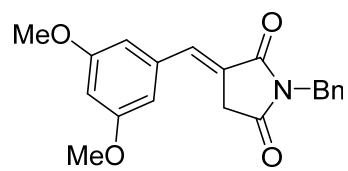

**1j**

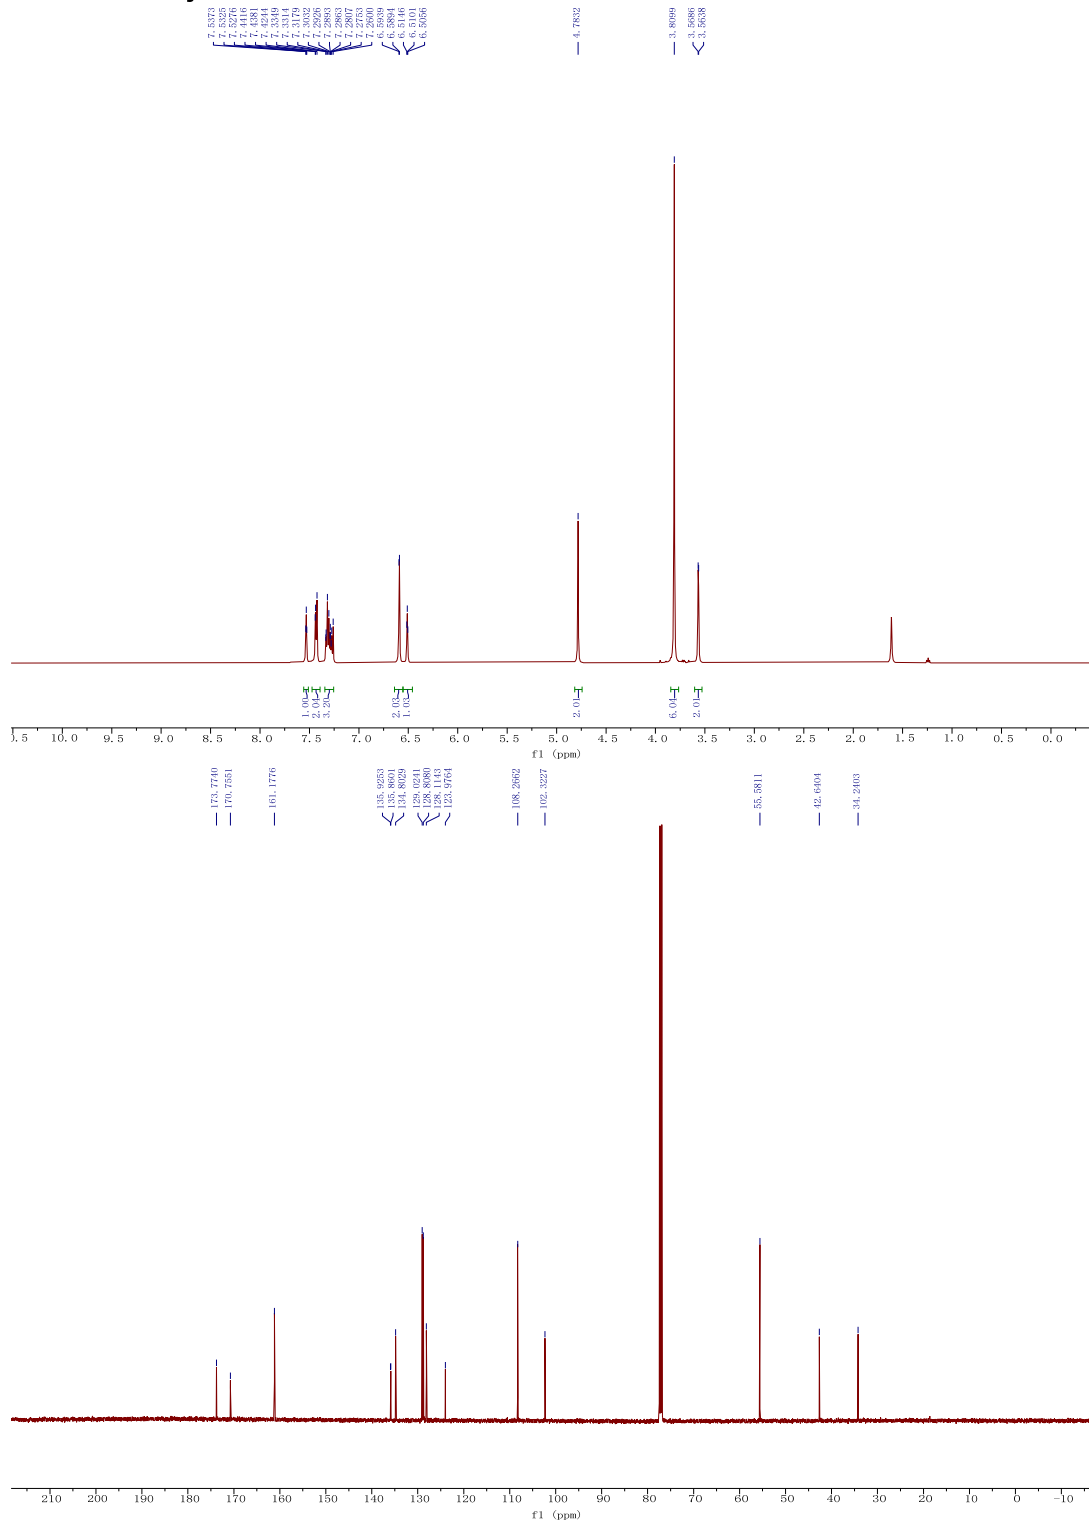



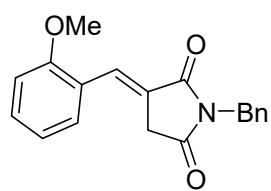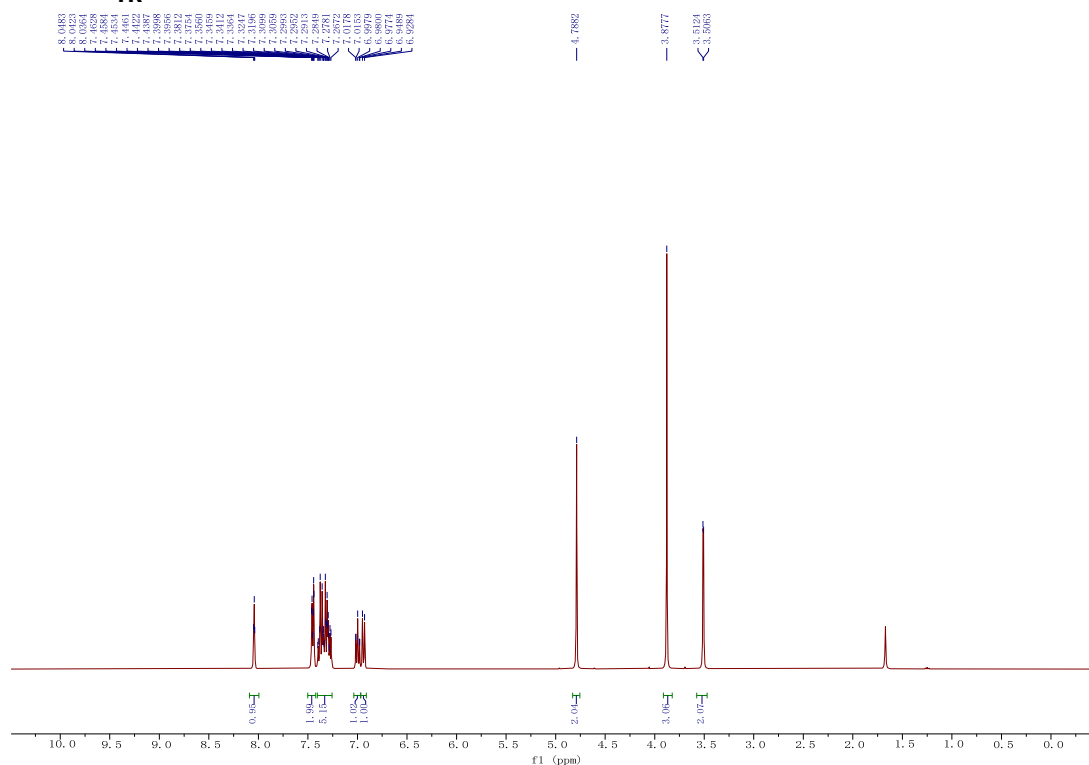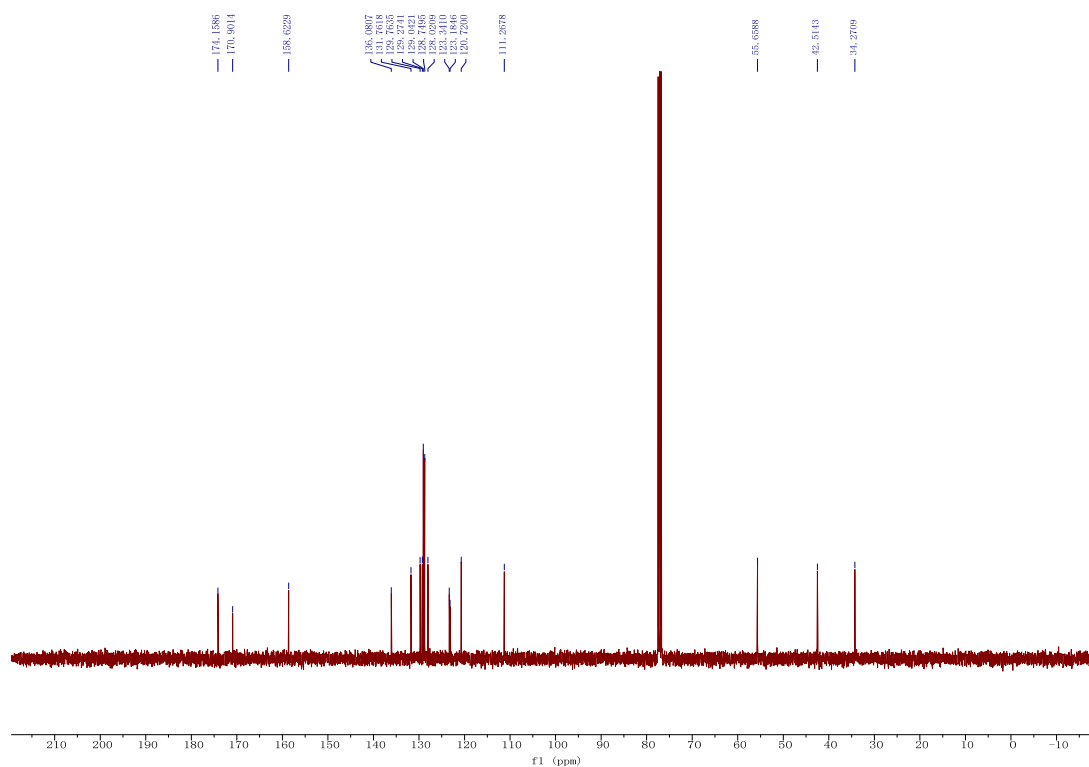



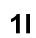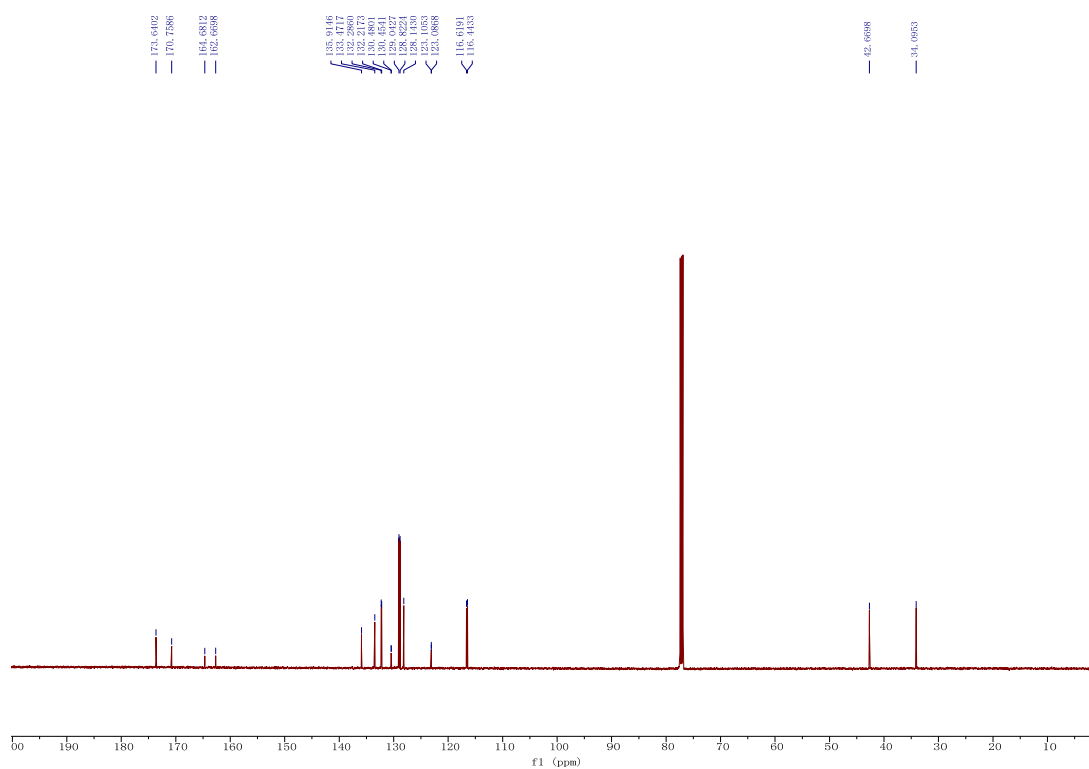



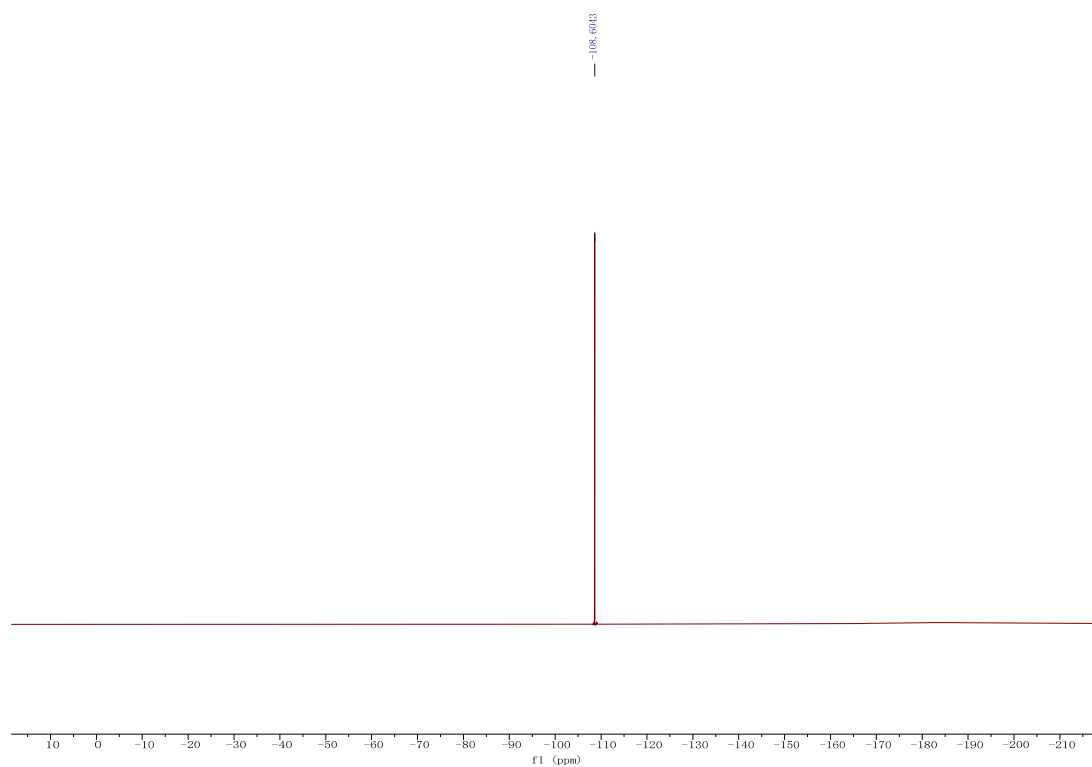



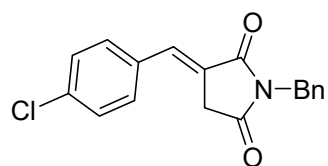

1m

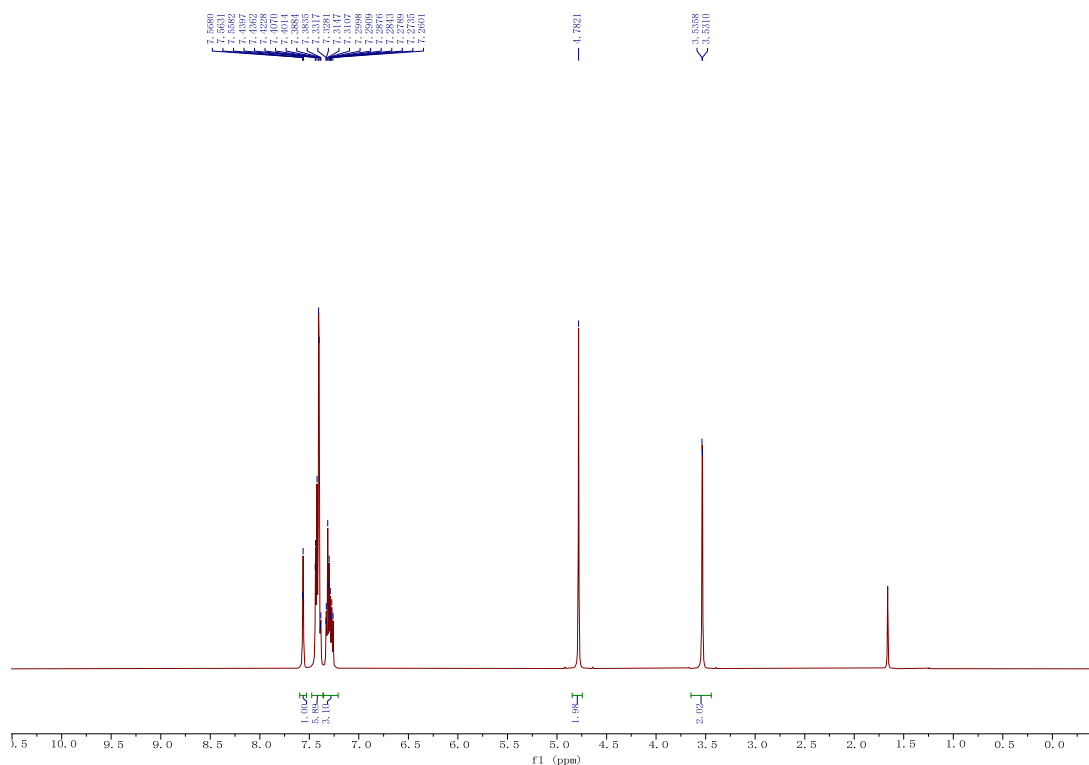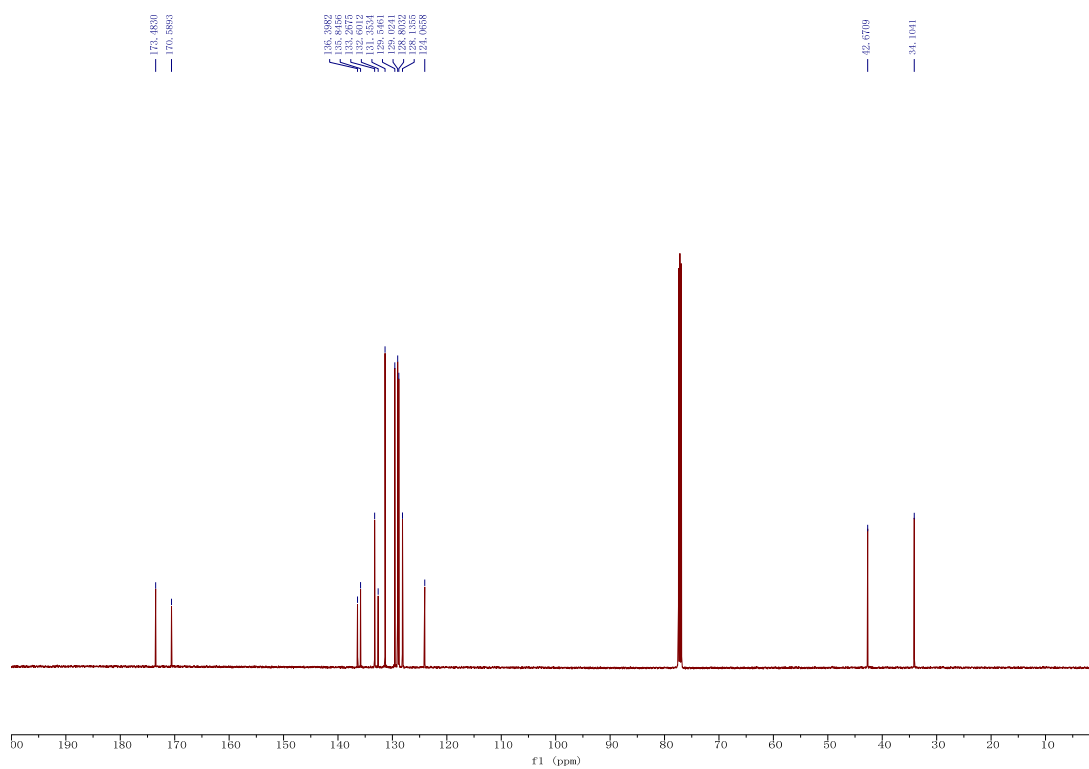



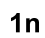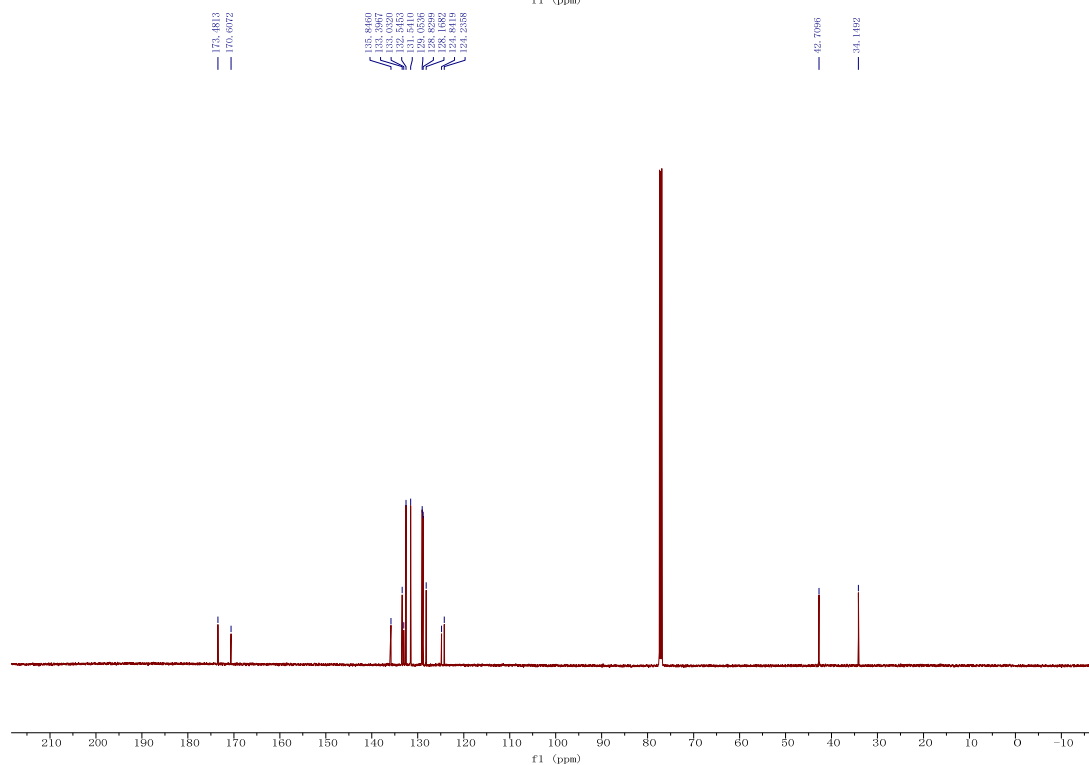



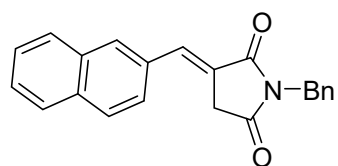

**1o**

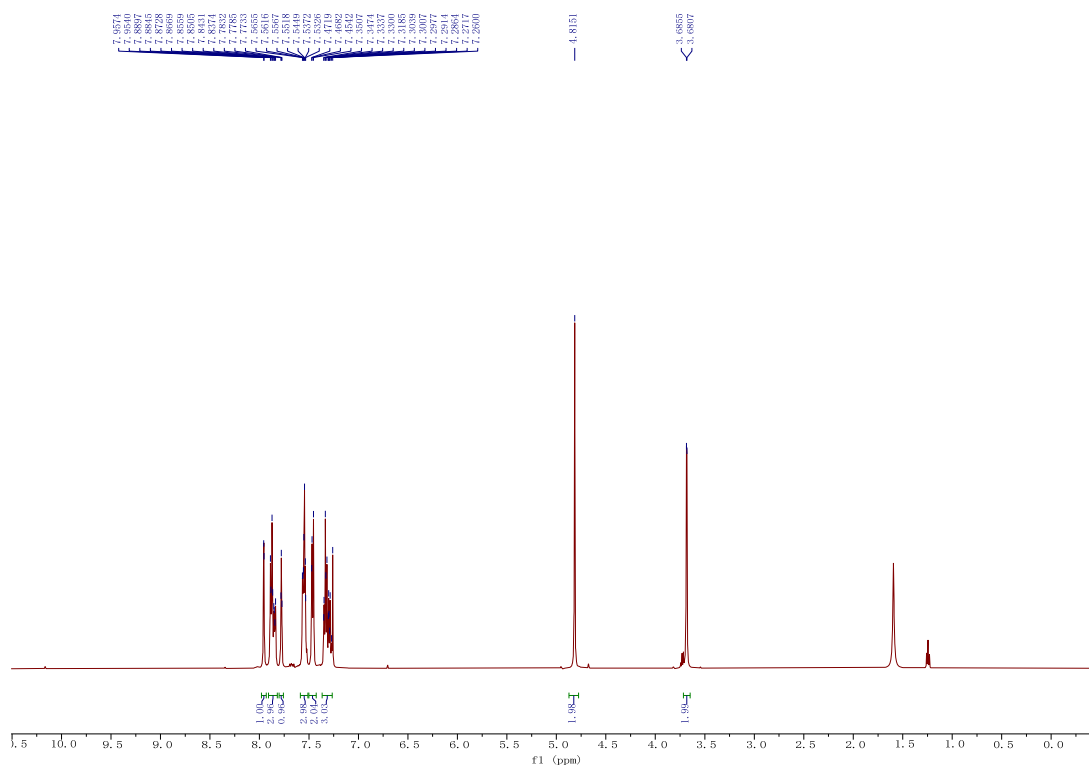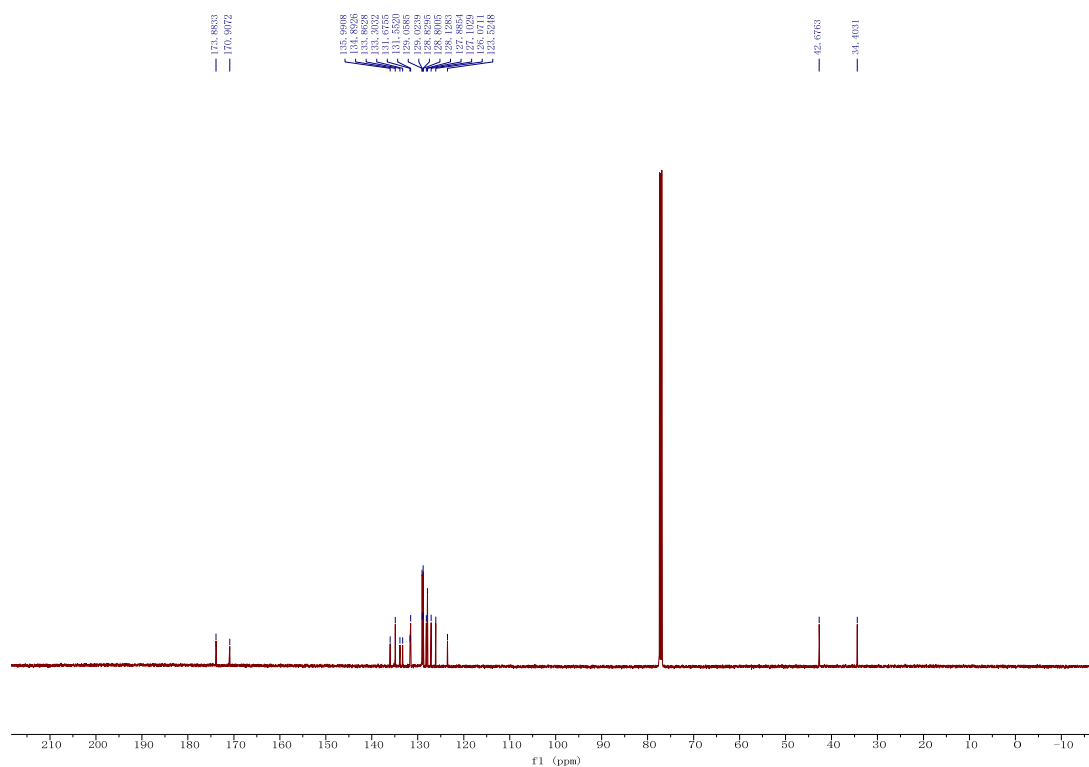



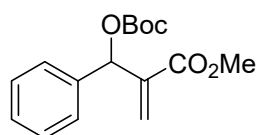

**2a**

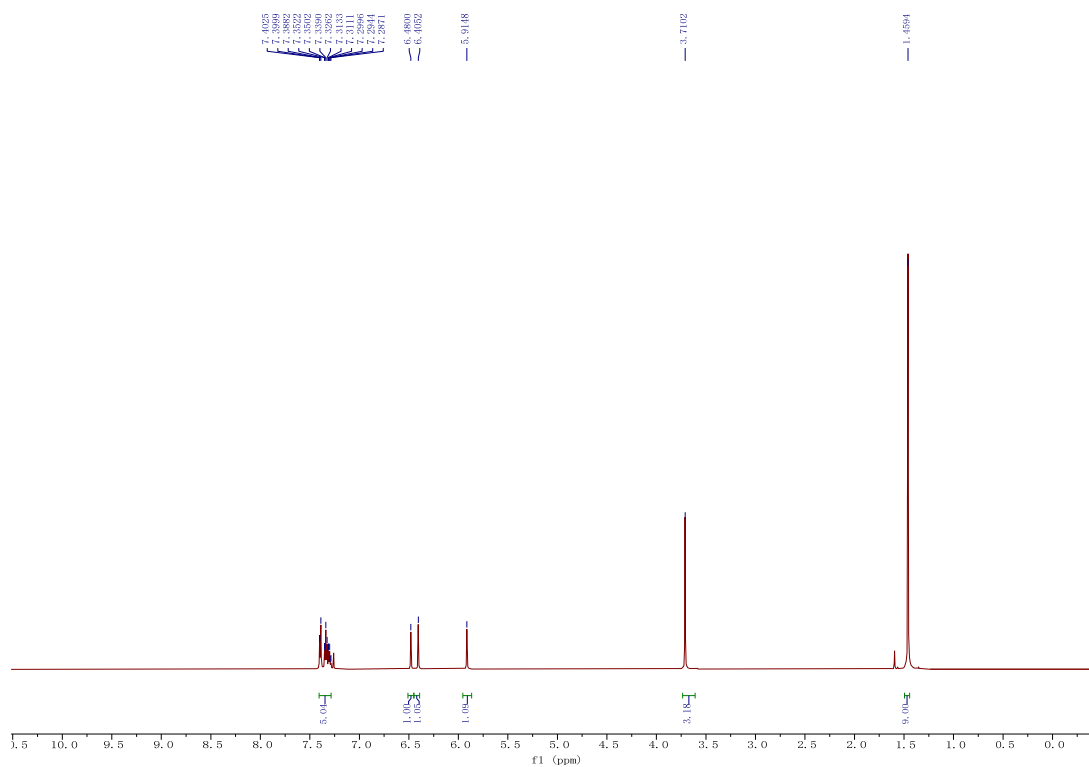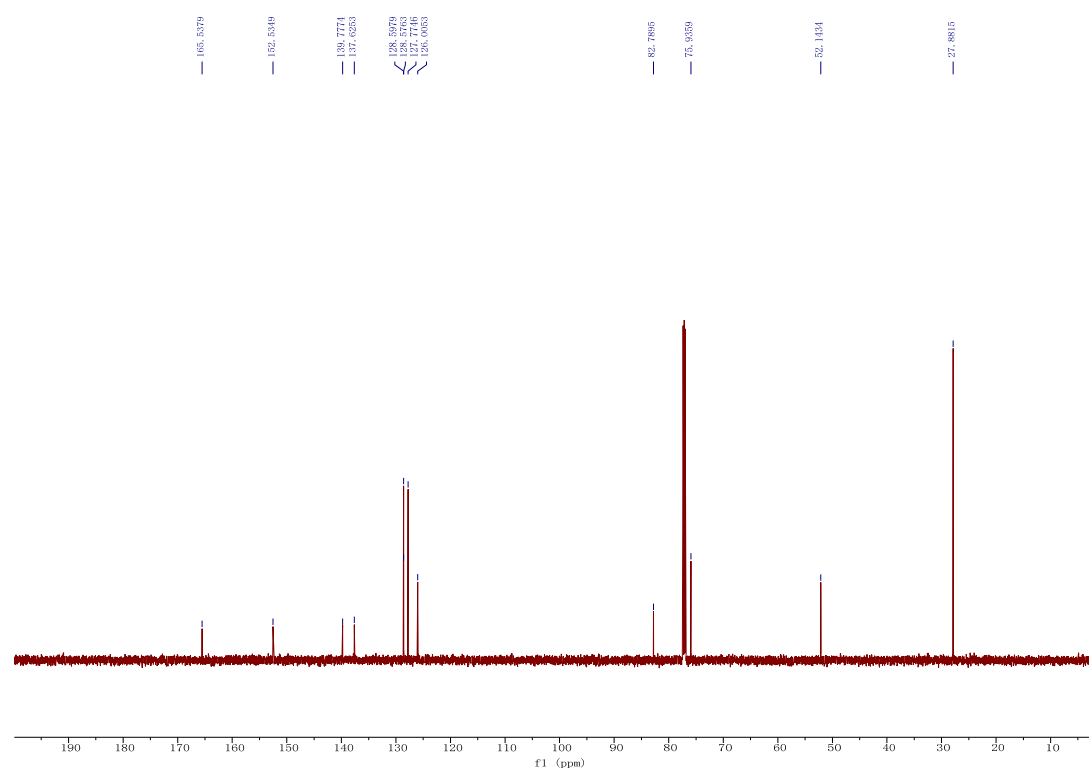



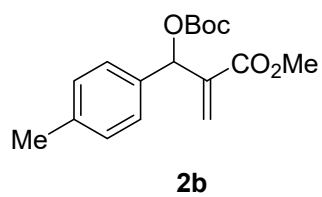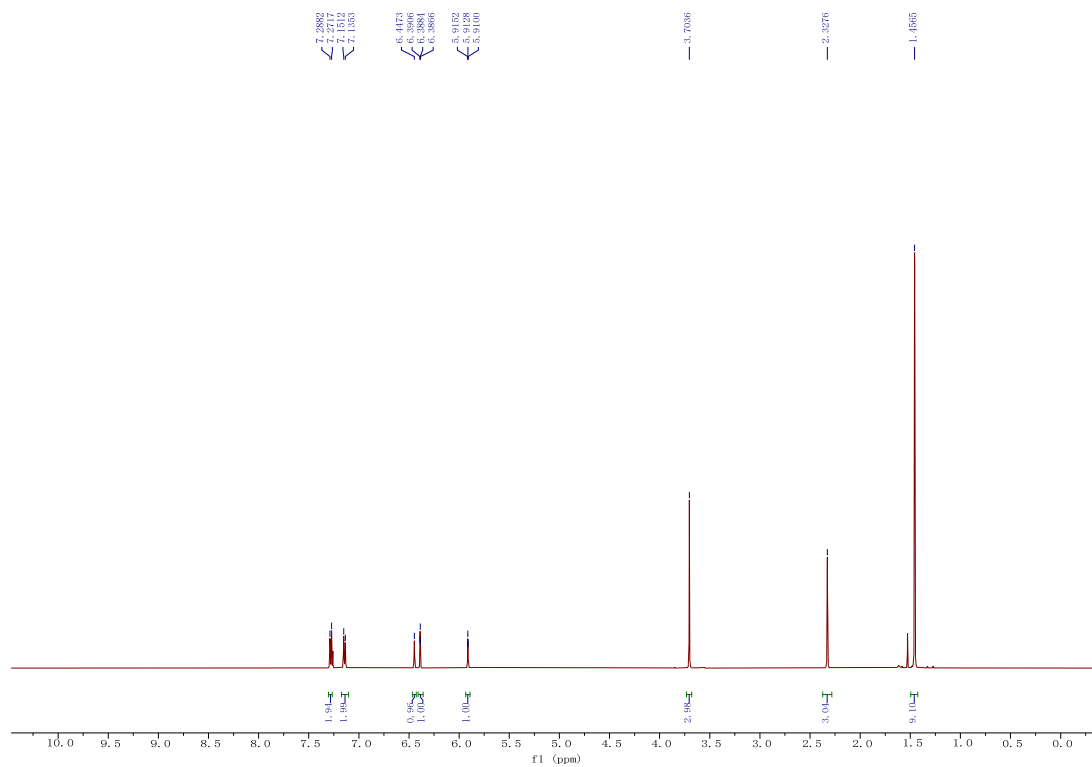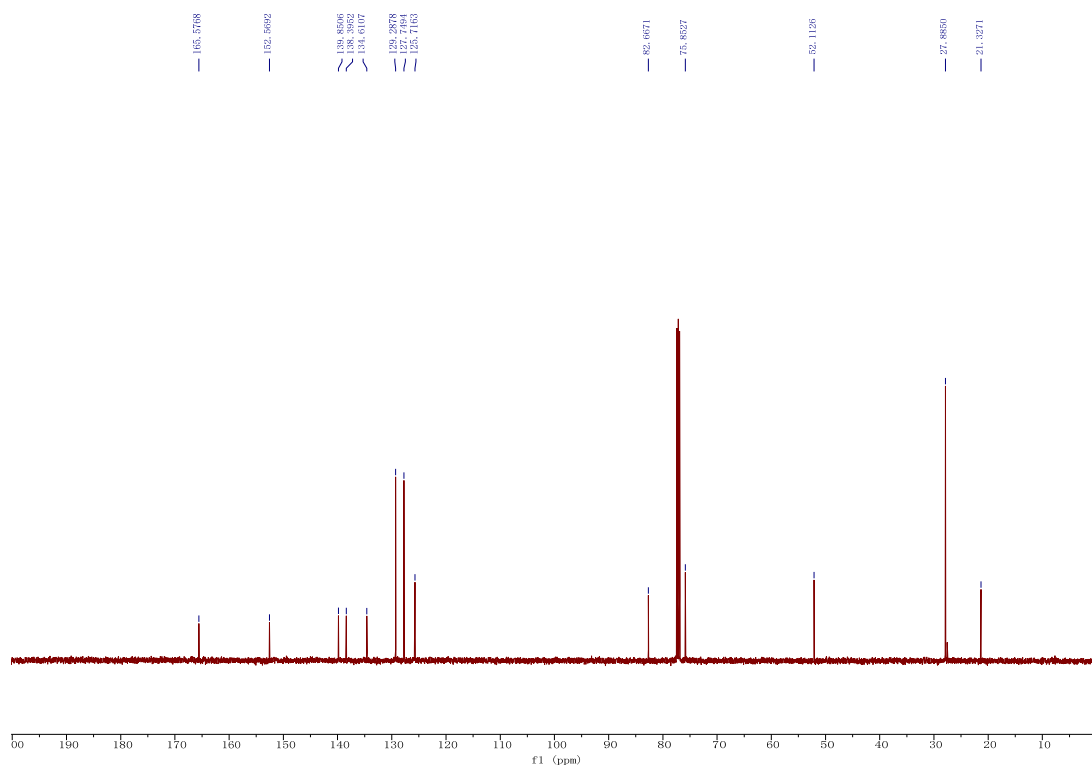



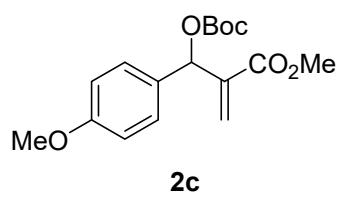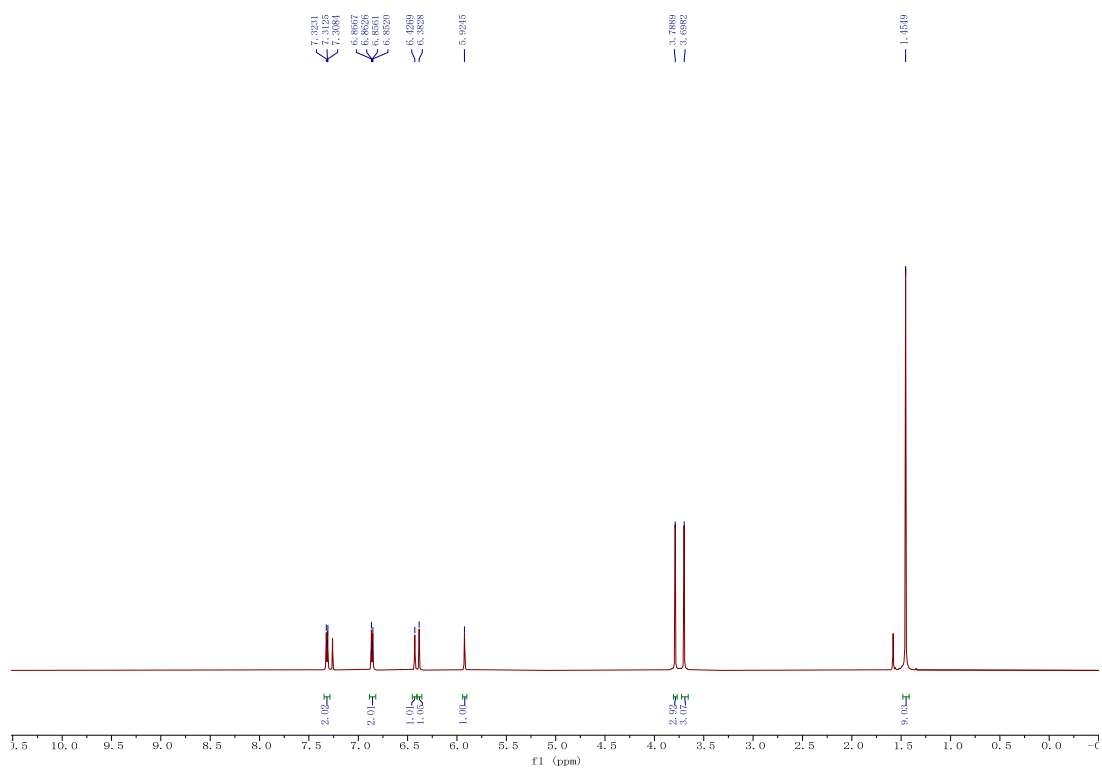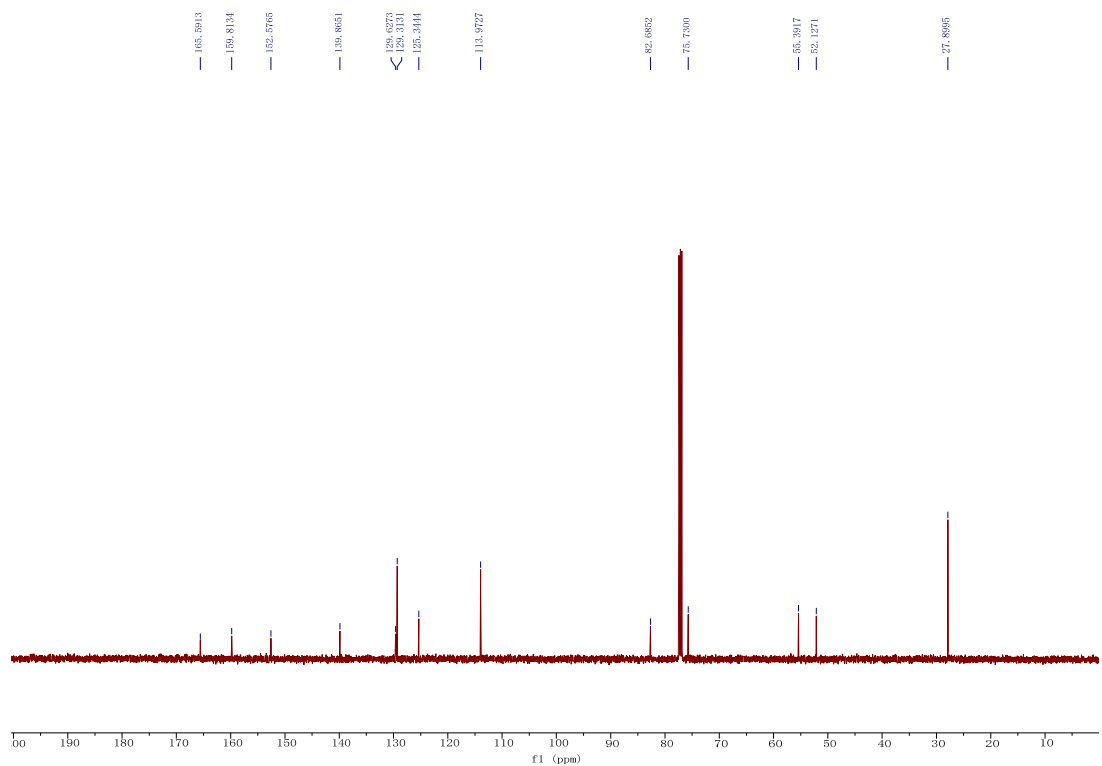



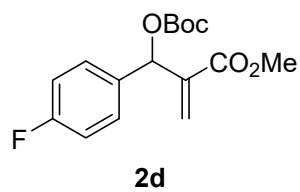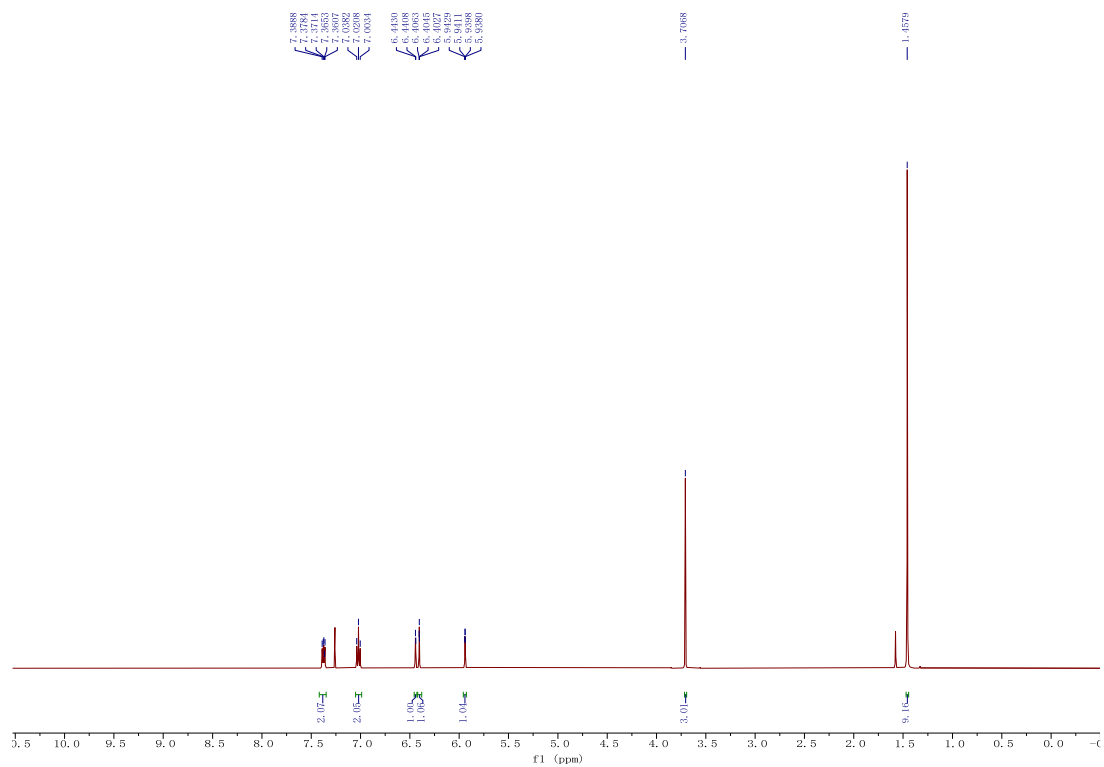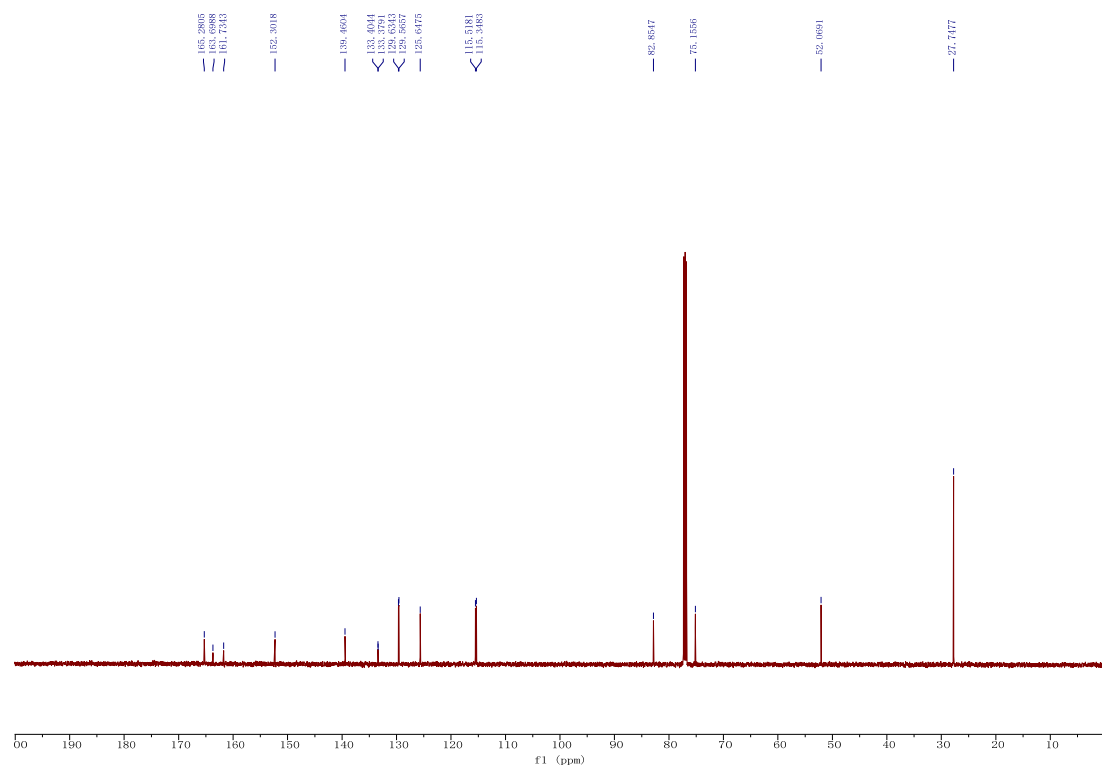



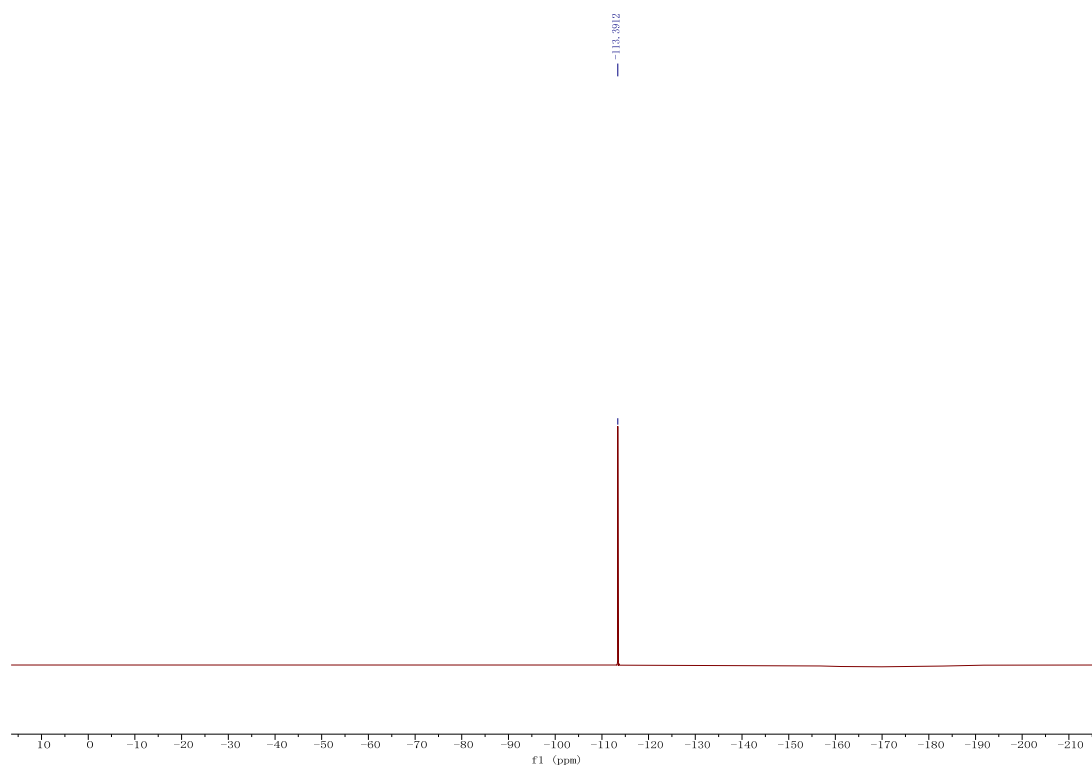



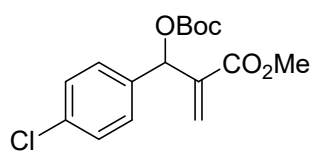

**2e**

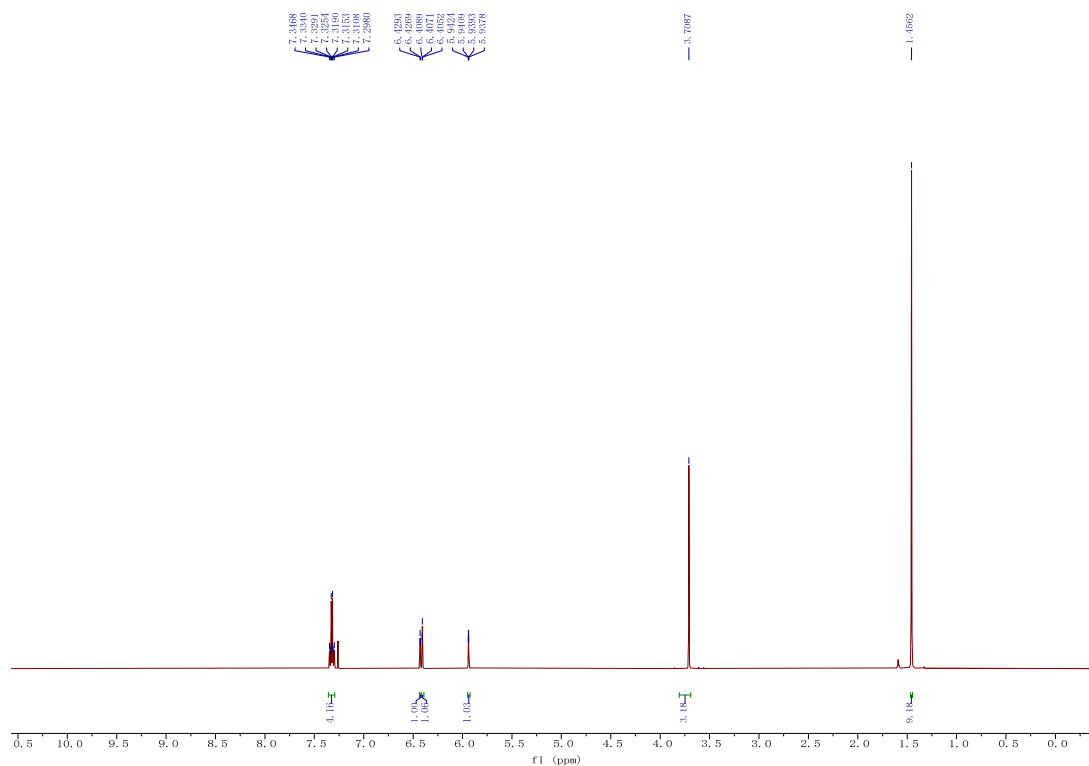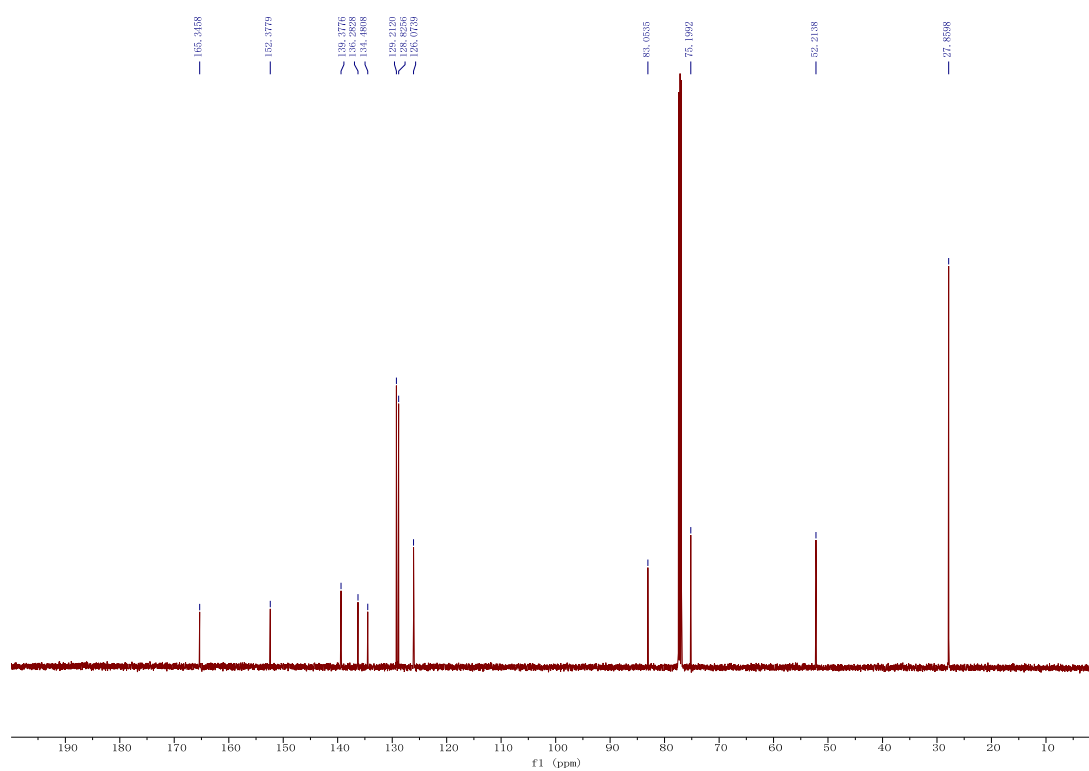



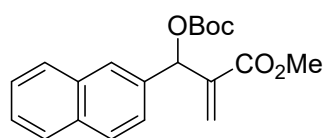

**2f**

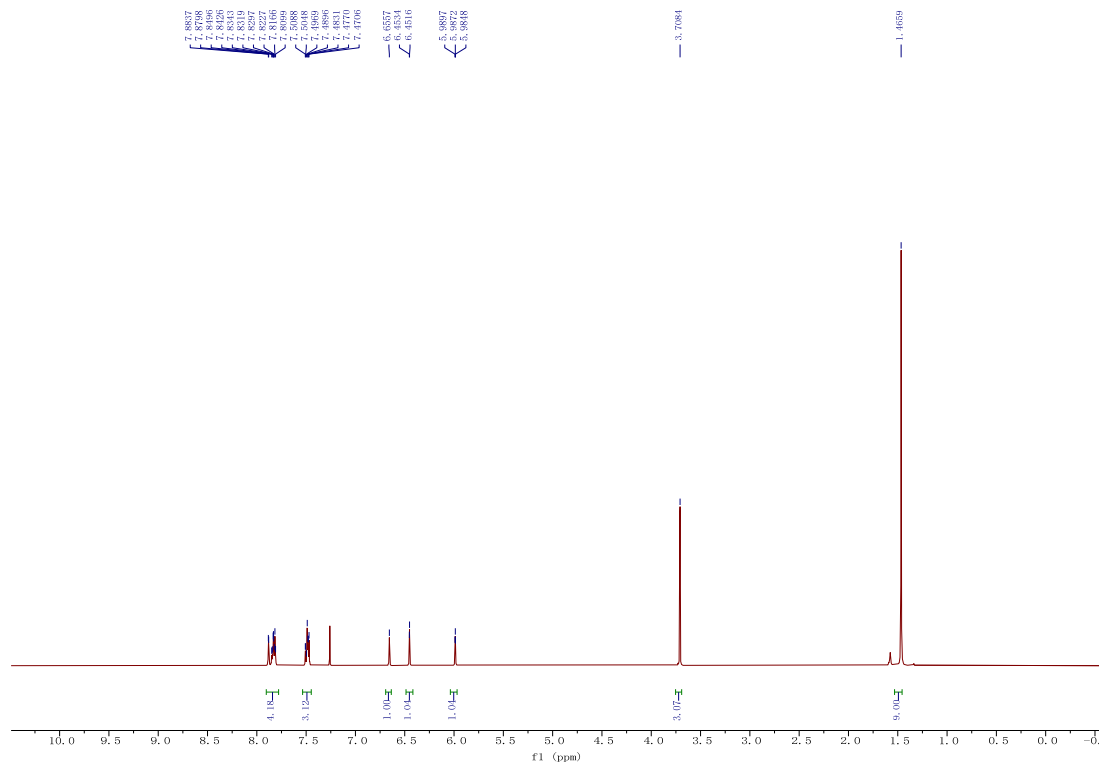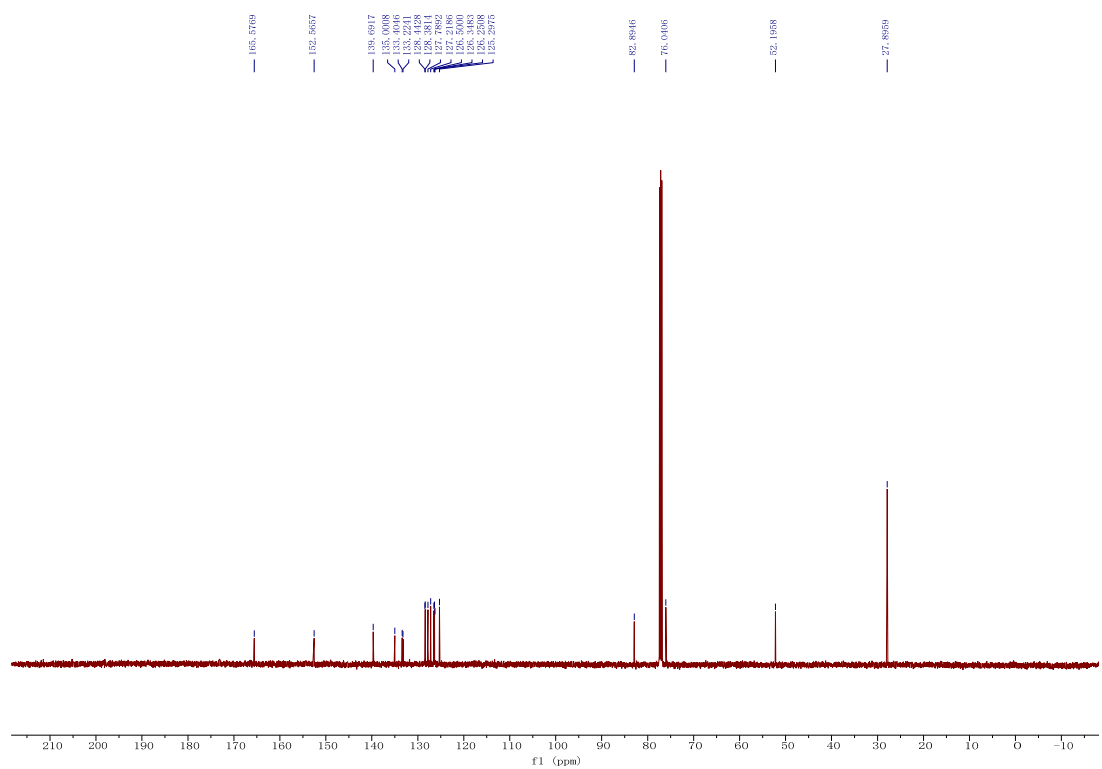



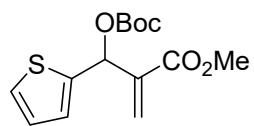

**2g**

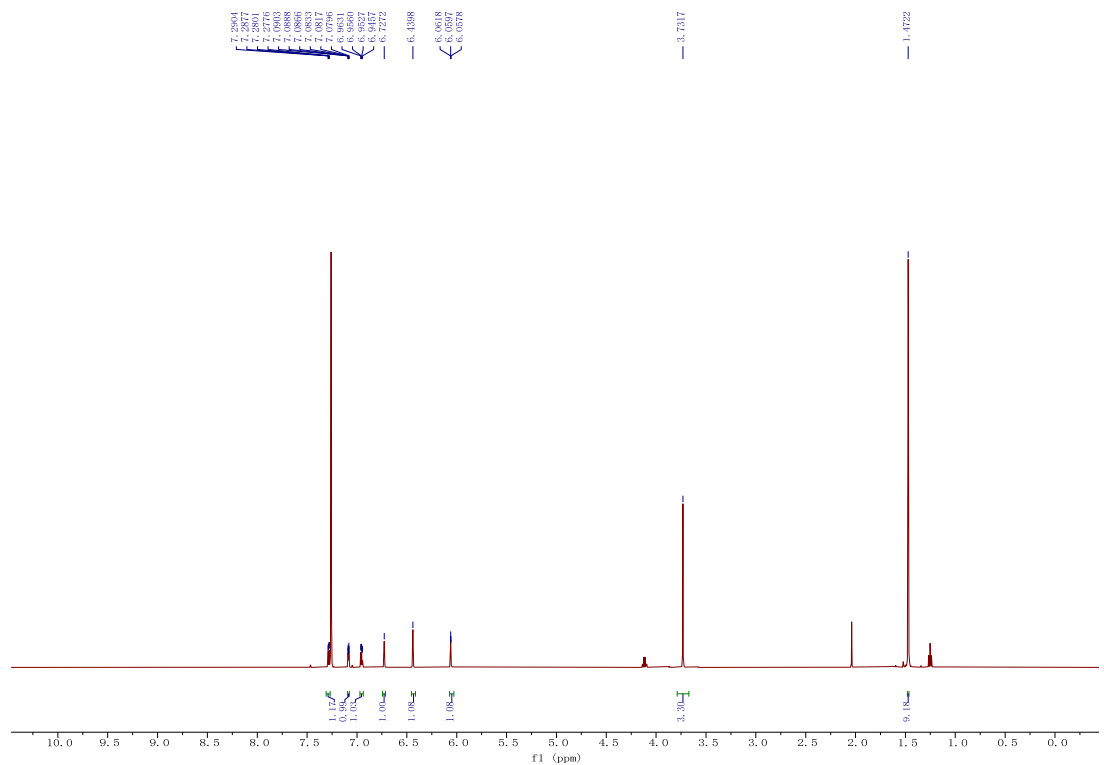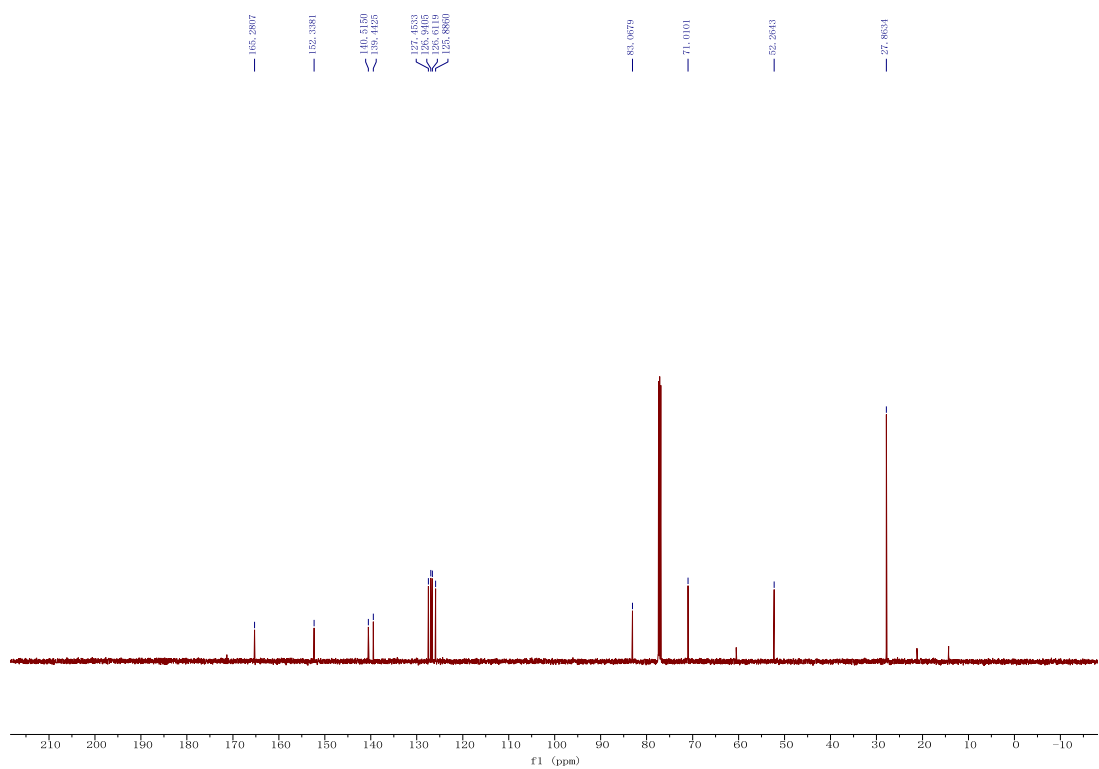



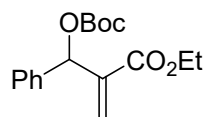

2h

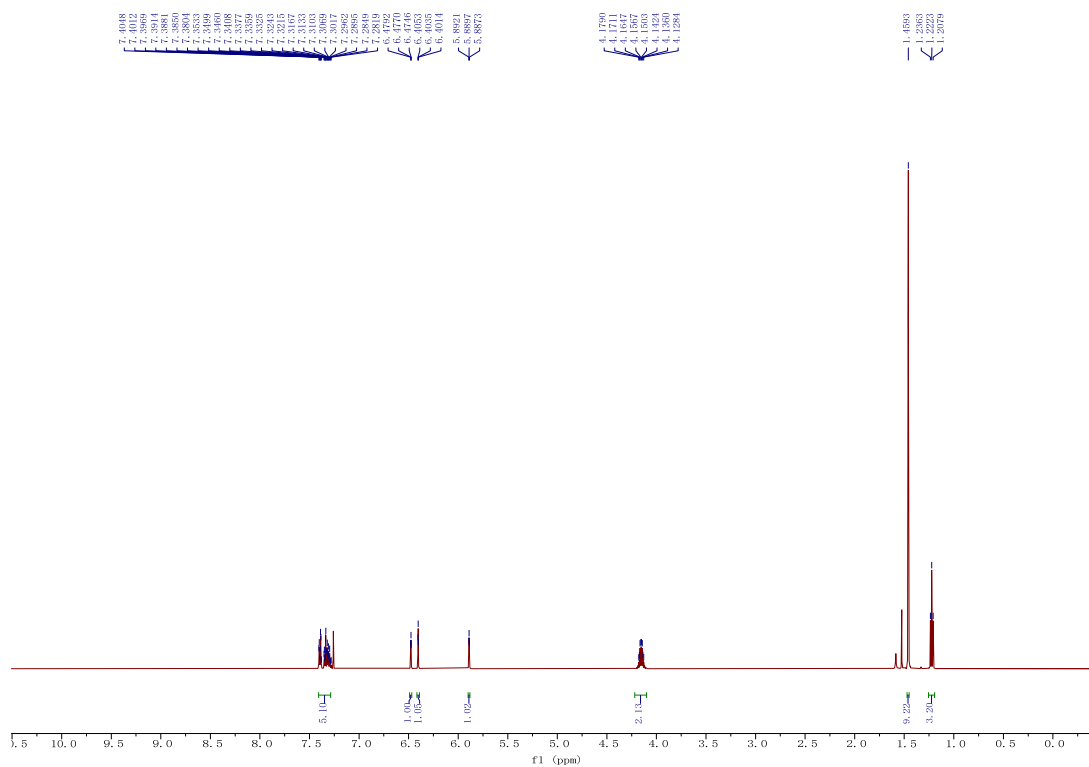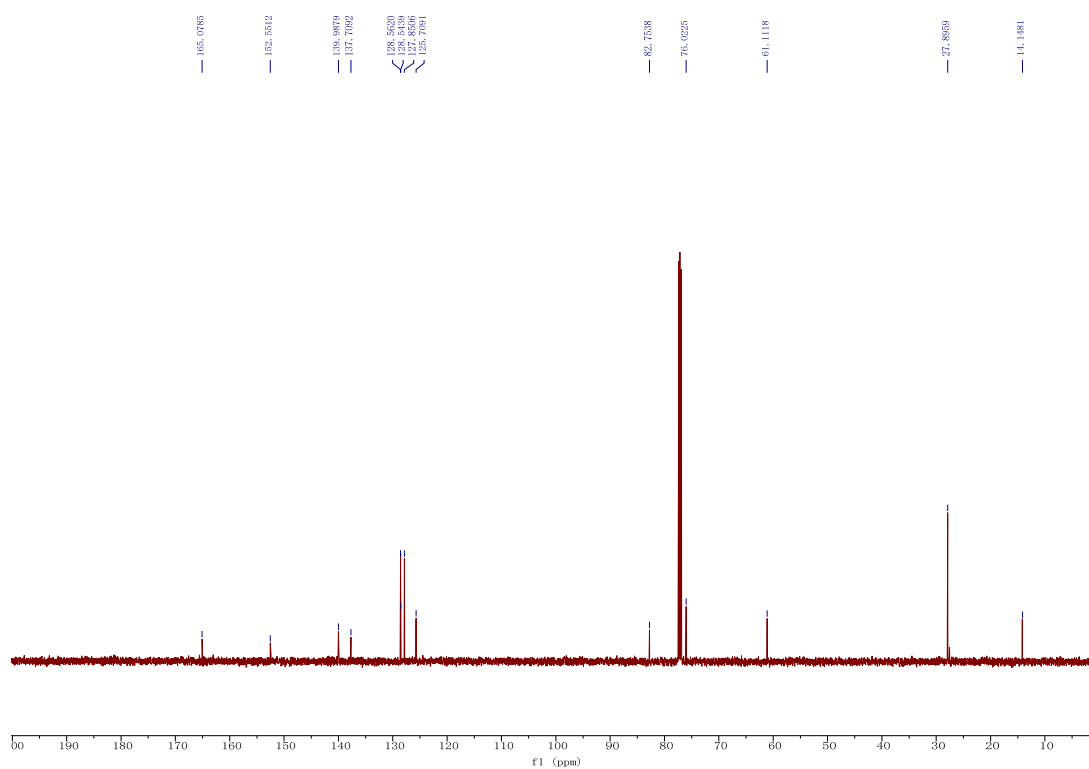



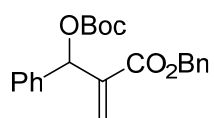

**2i**

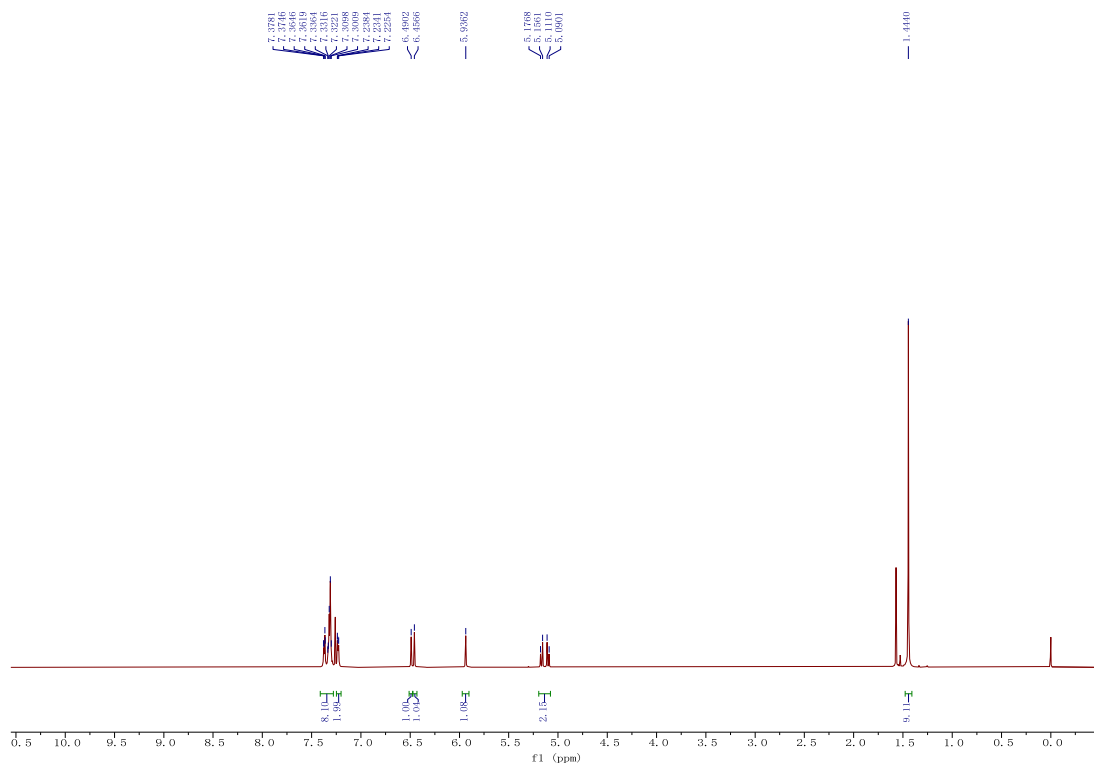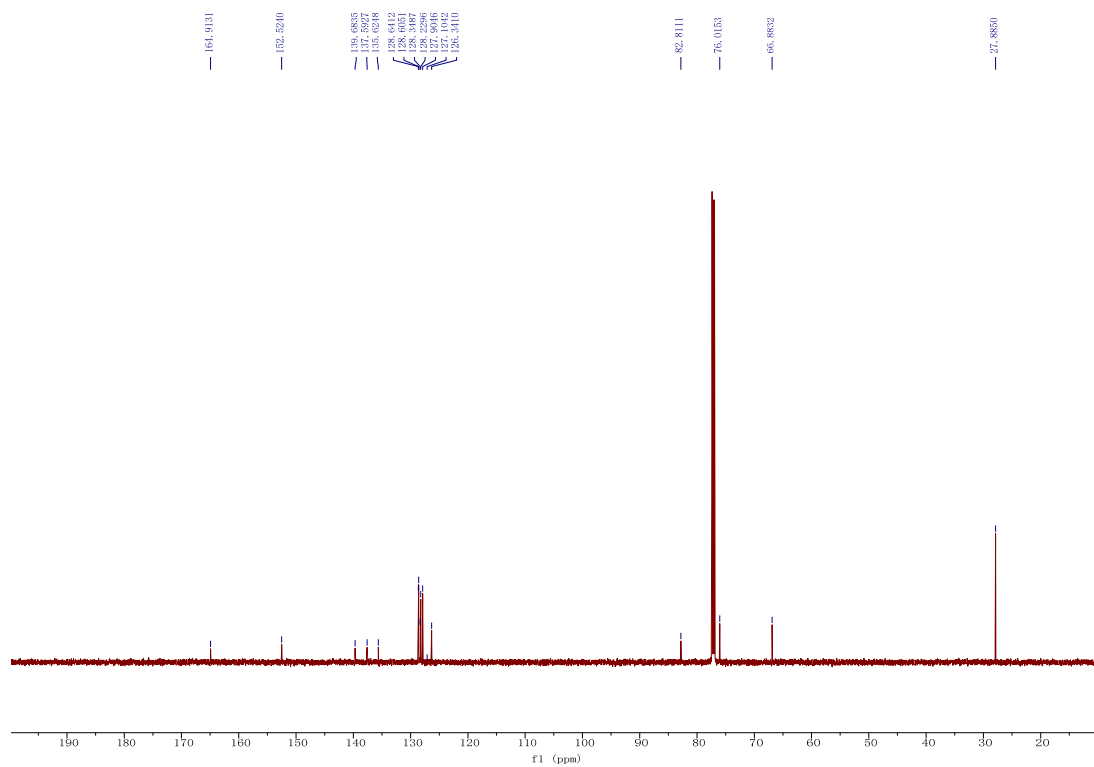



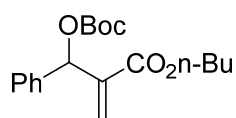

2j

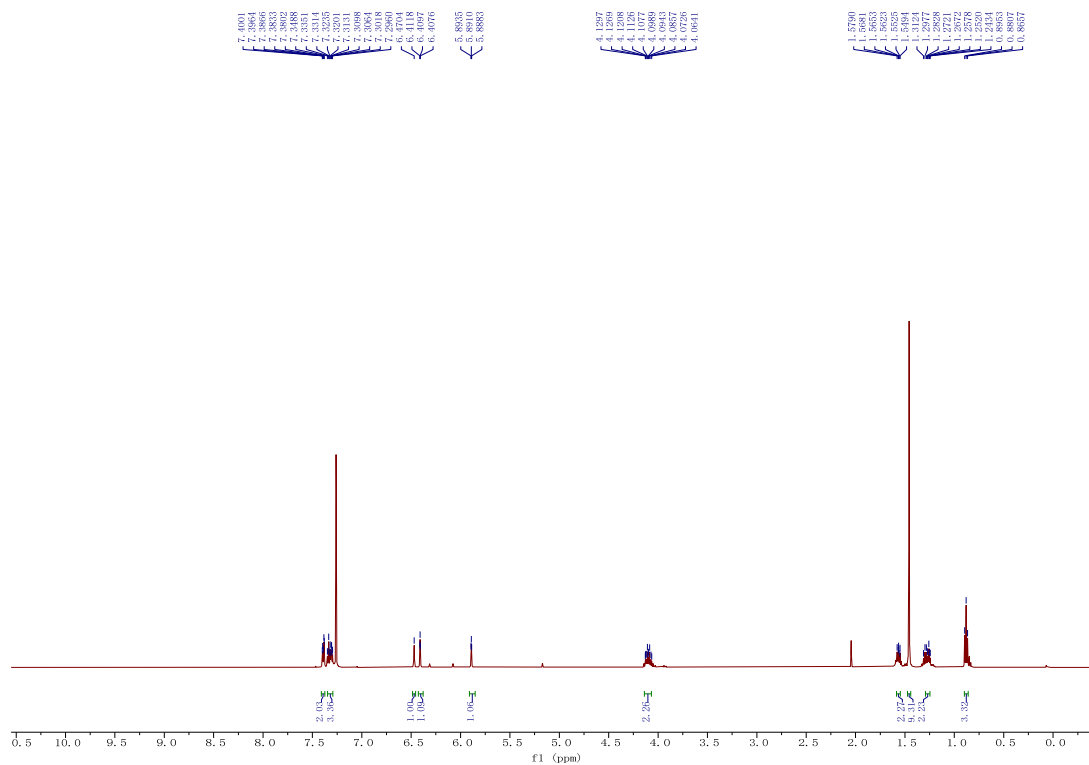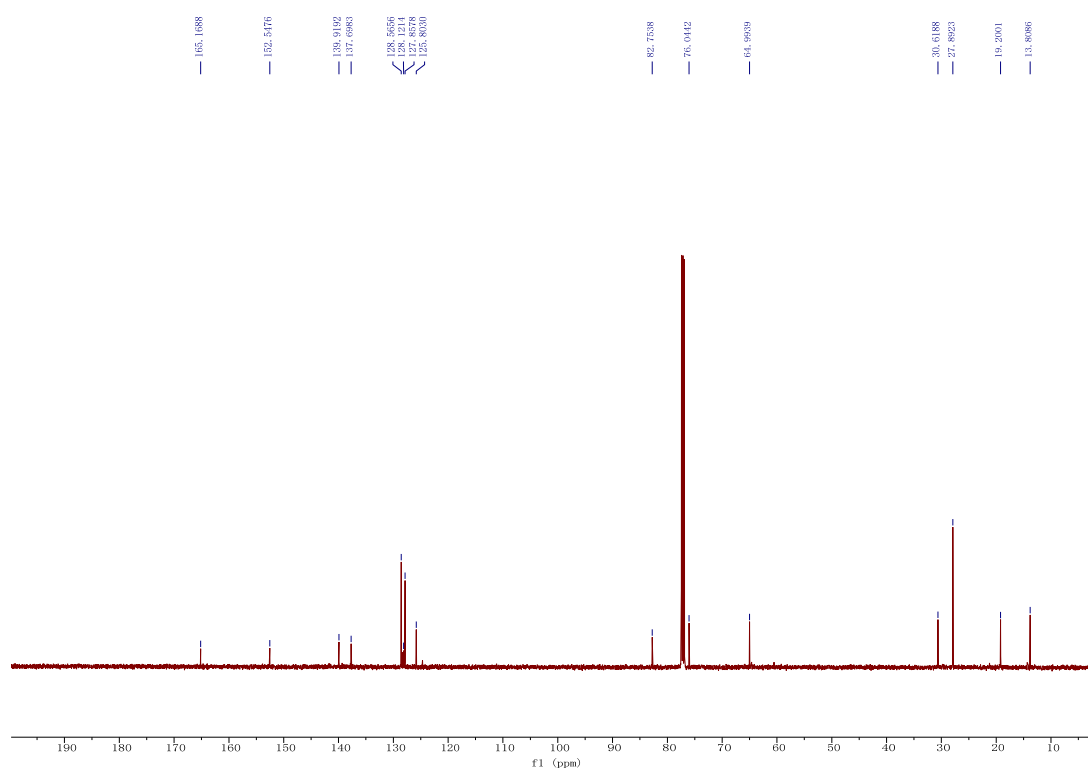



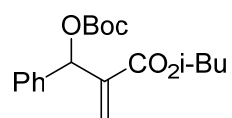

2k

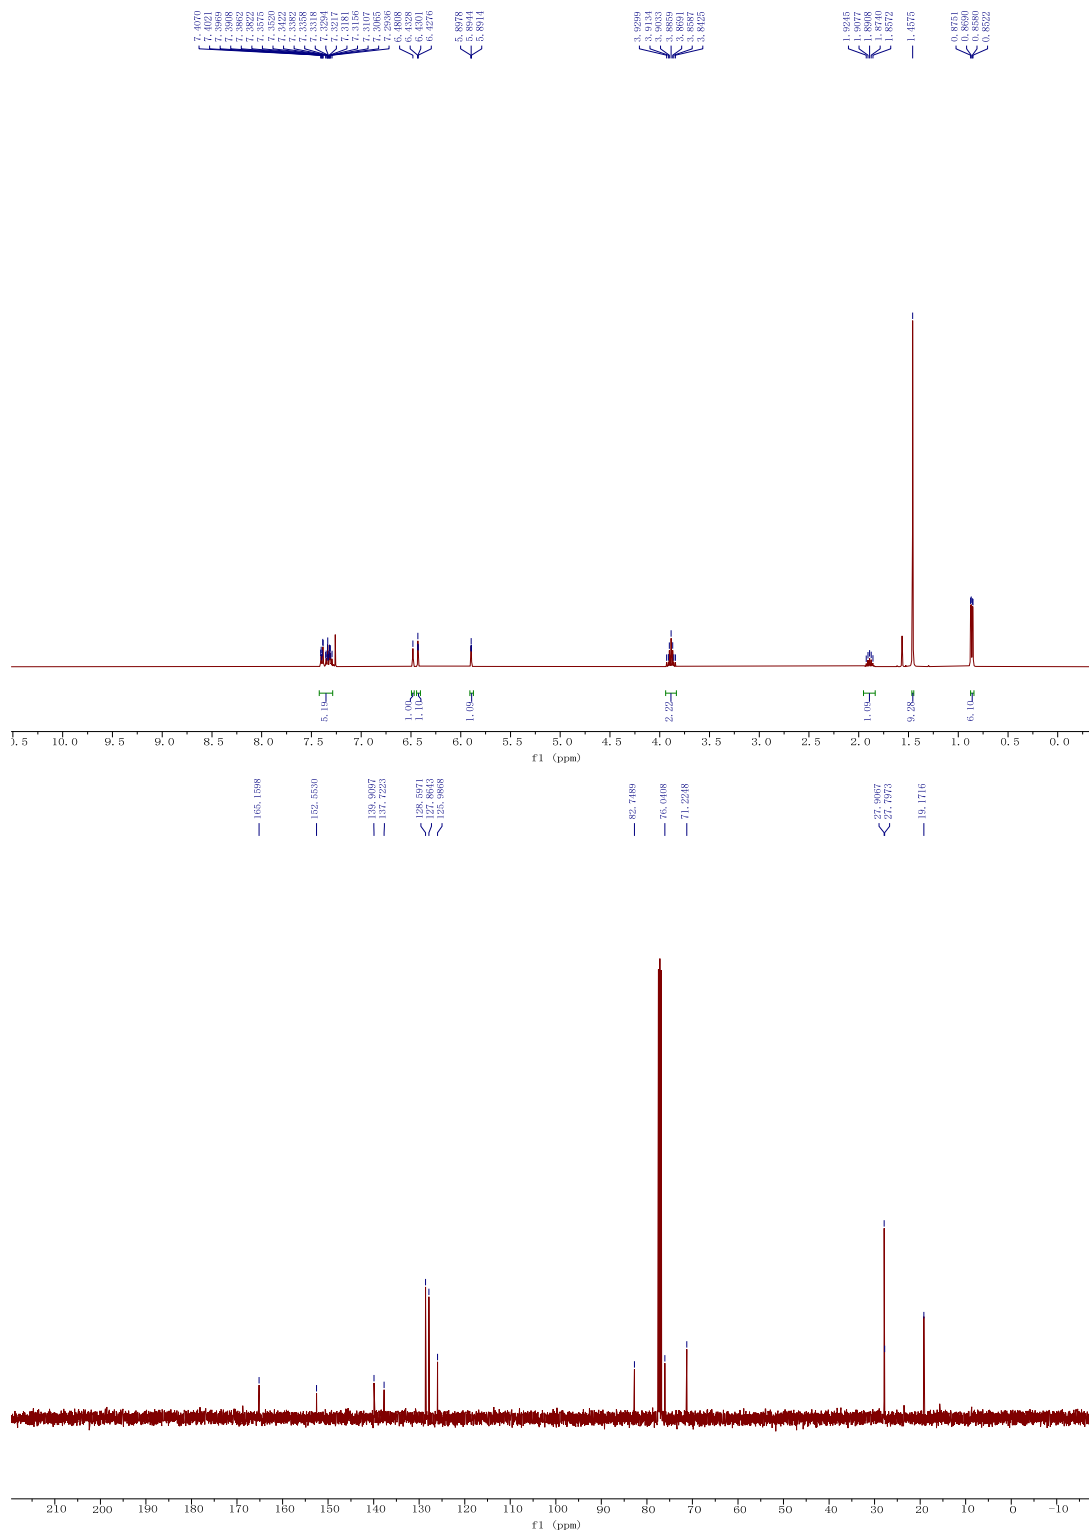



**3aa**

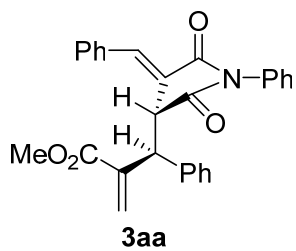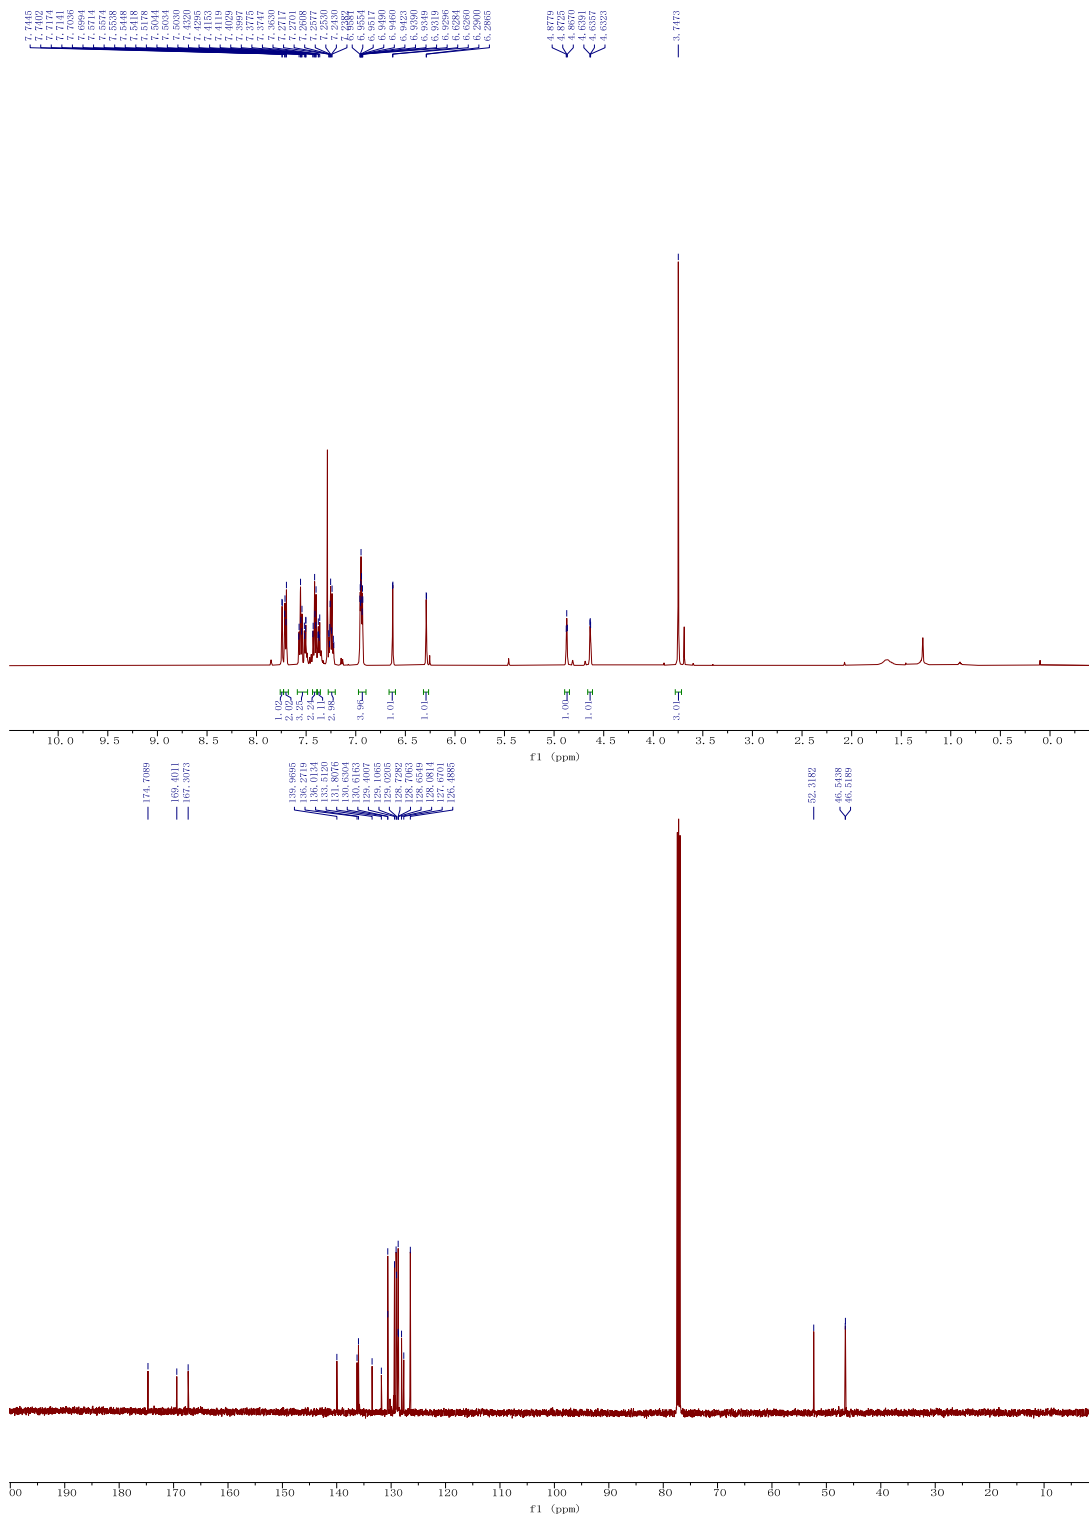



**3ba**

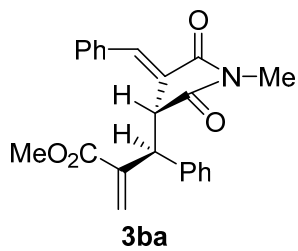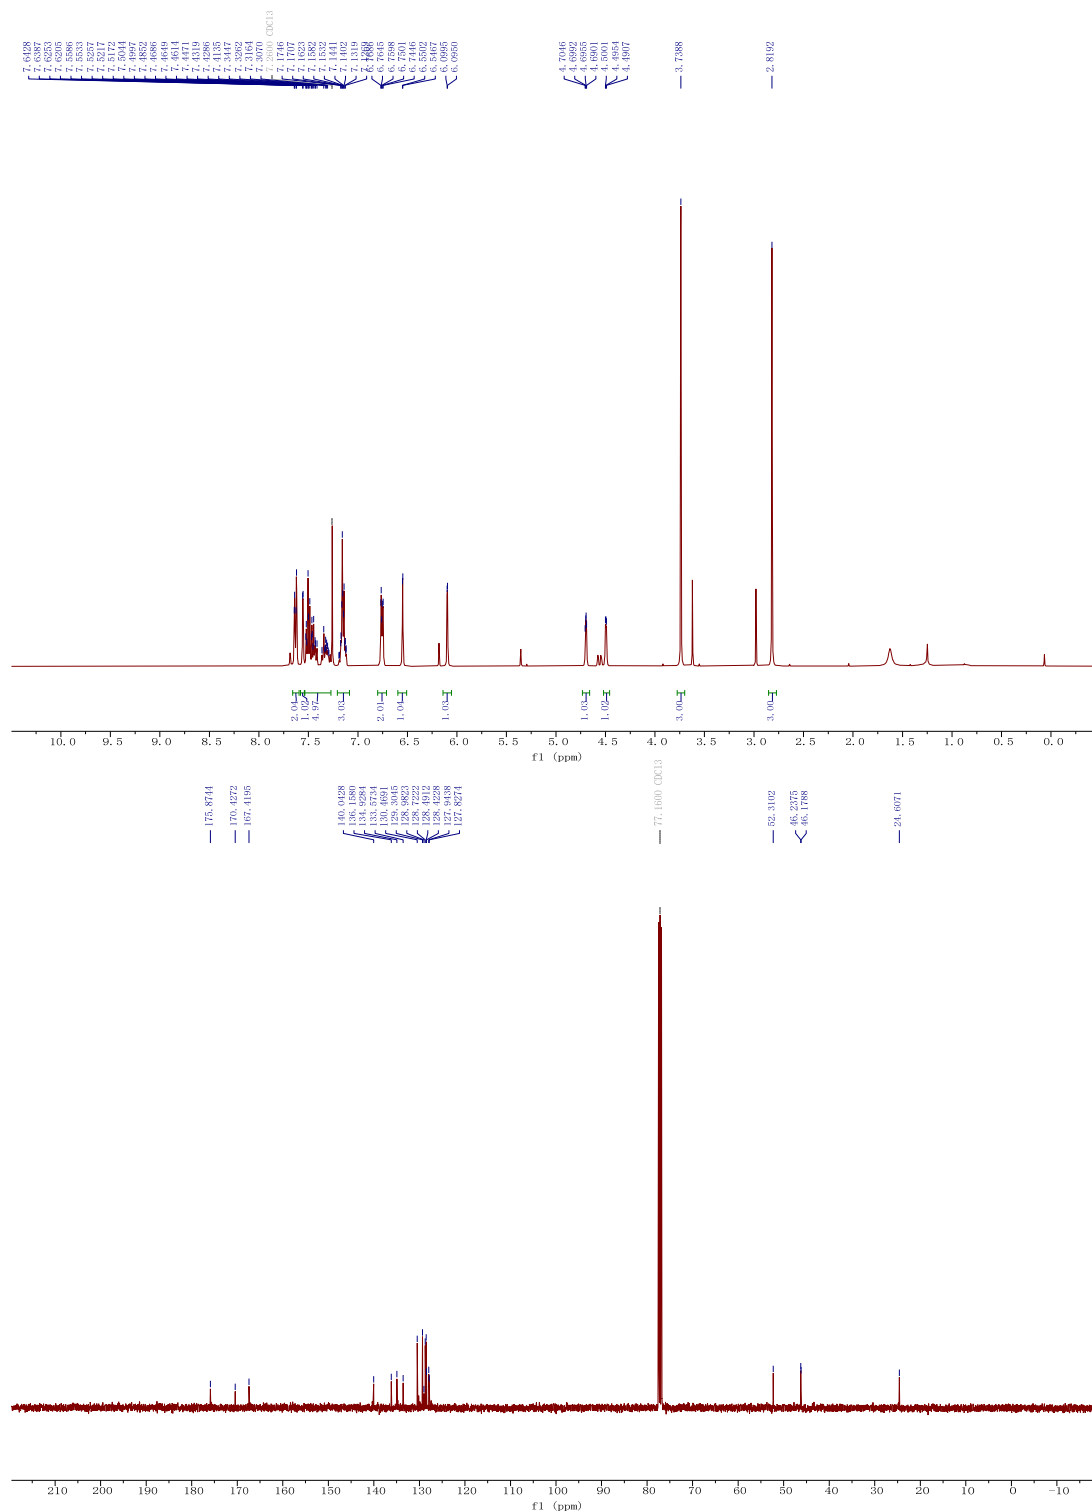



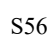



**3da**

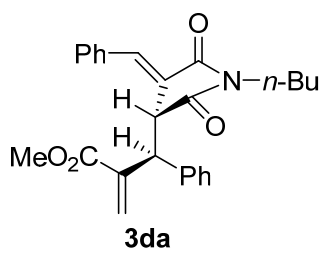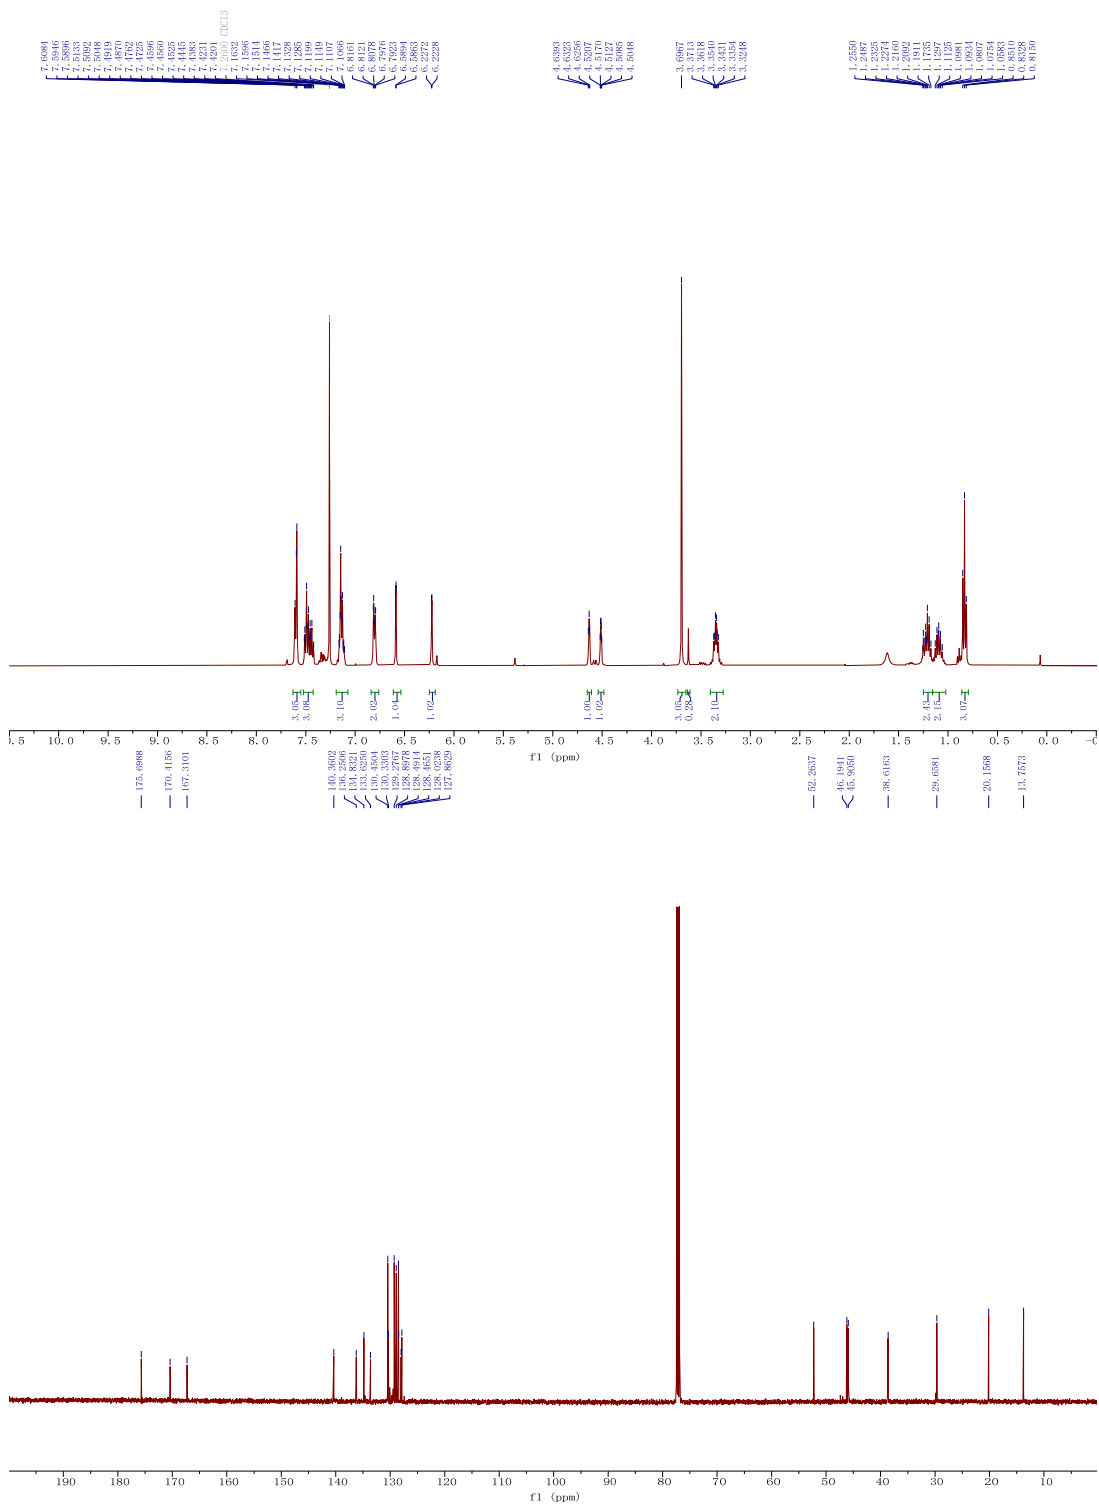



3ea

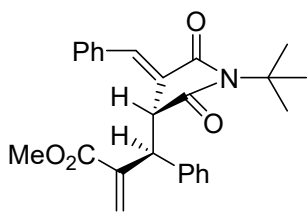

3ea

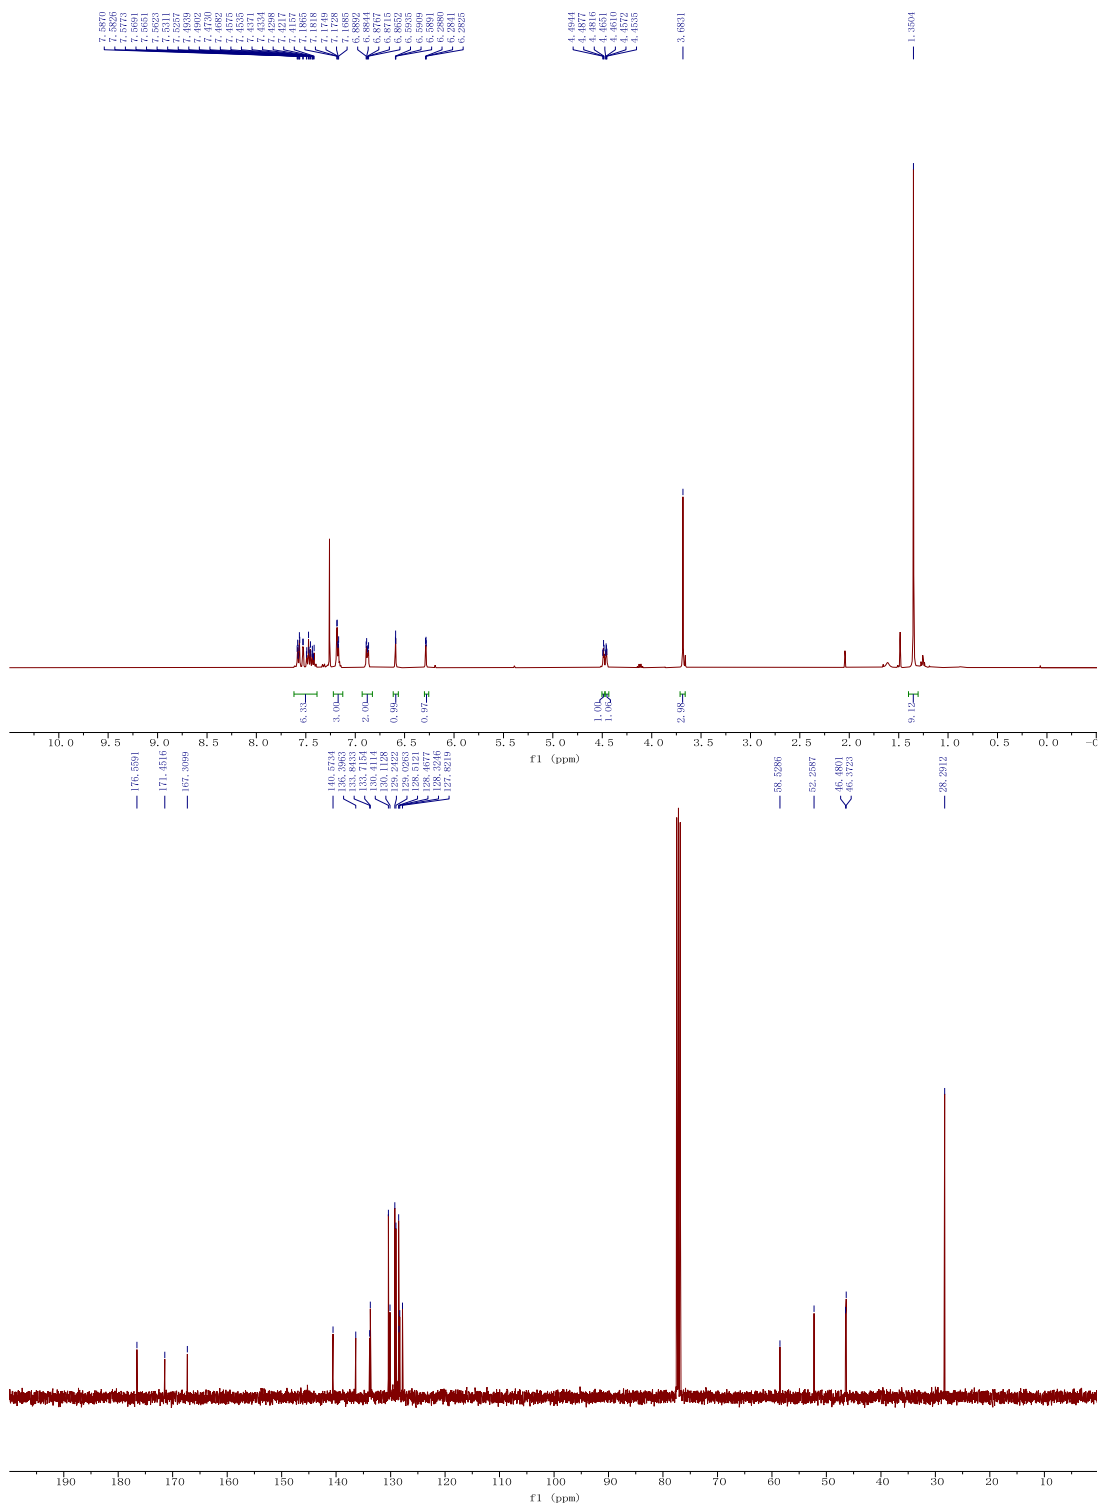



3fa

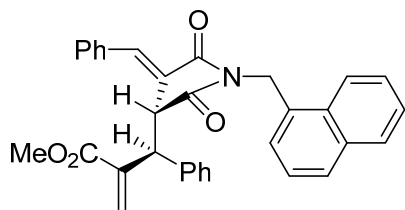

3fa

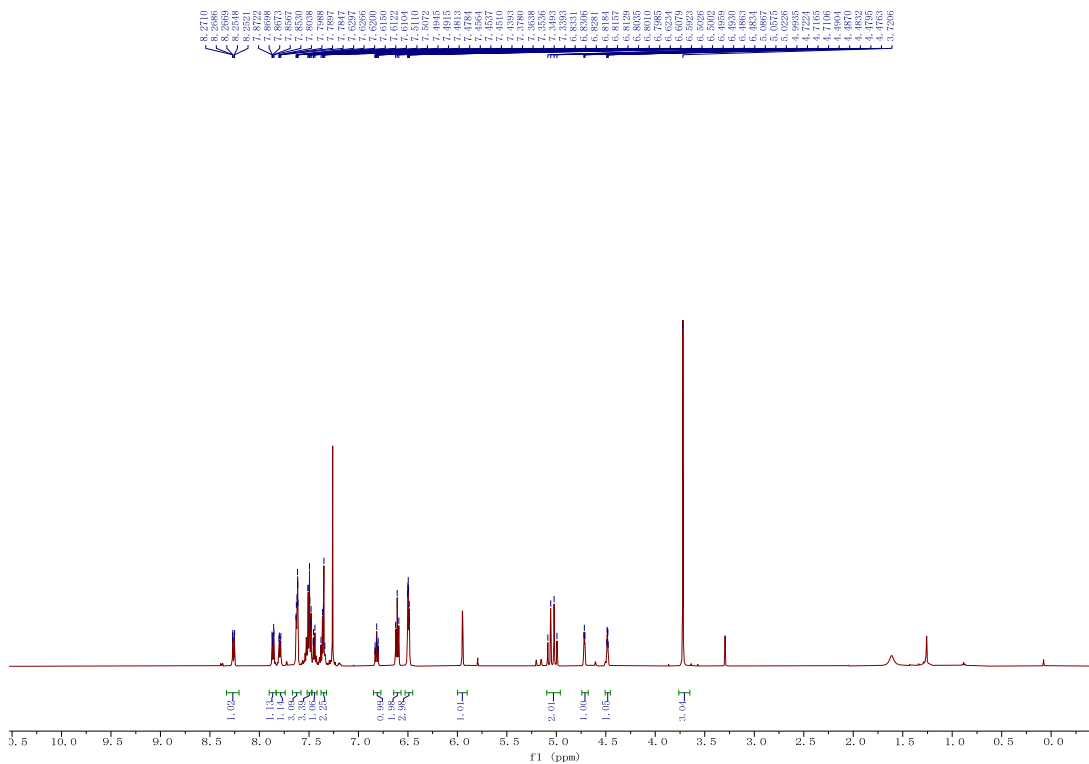



7.45361  
7.4501  
7.4362  
7.4263  
7.2205  
7.2091  
7.2051  
7.2012  
7.1973  
7.1915  
7.1864  
7.1812  
7.1784  
7.1747  
7.1711  
7.1670  
7.1619  
6.9828  
6.9680  
6.9533  
6.8213  
6.8088  
6.7932  
6.5012  
6.4988  
6.4851  
6.4822  
6.4154  
6.4135

4.4772  
4.4657  
4.4625  
4.4558

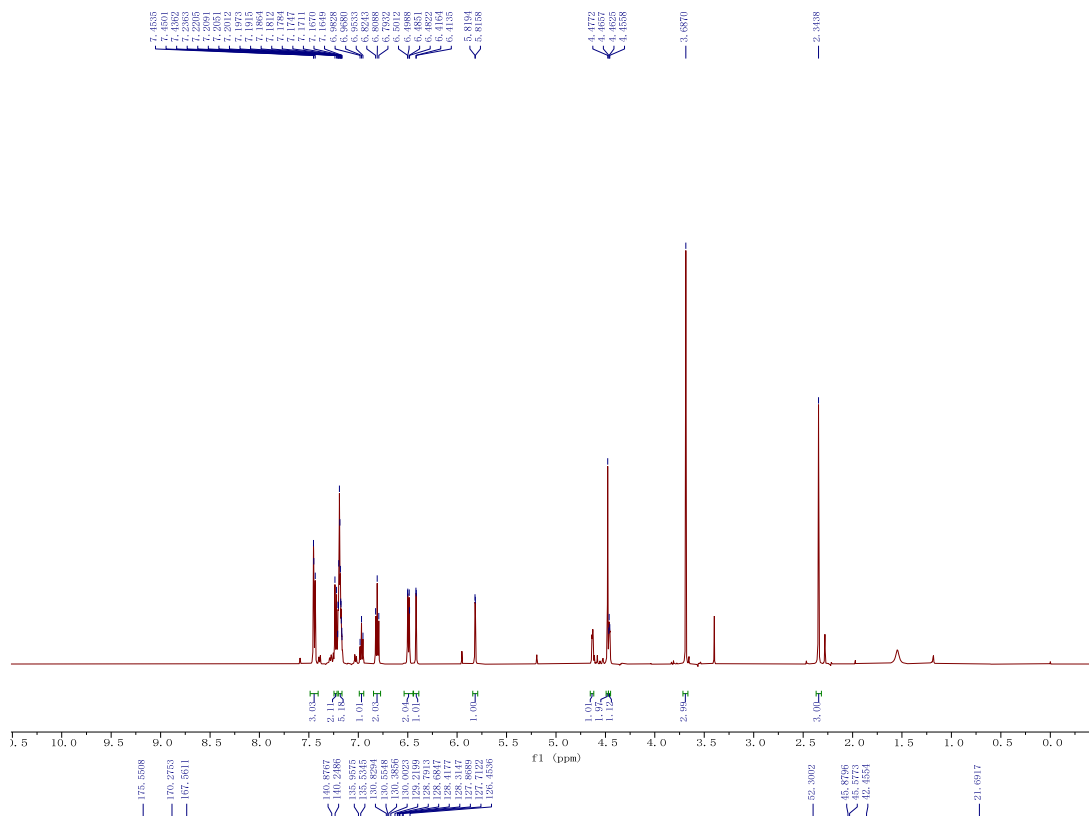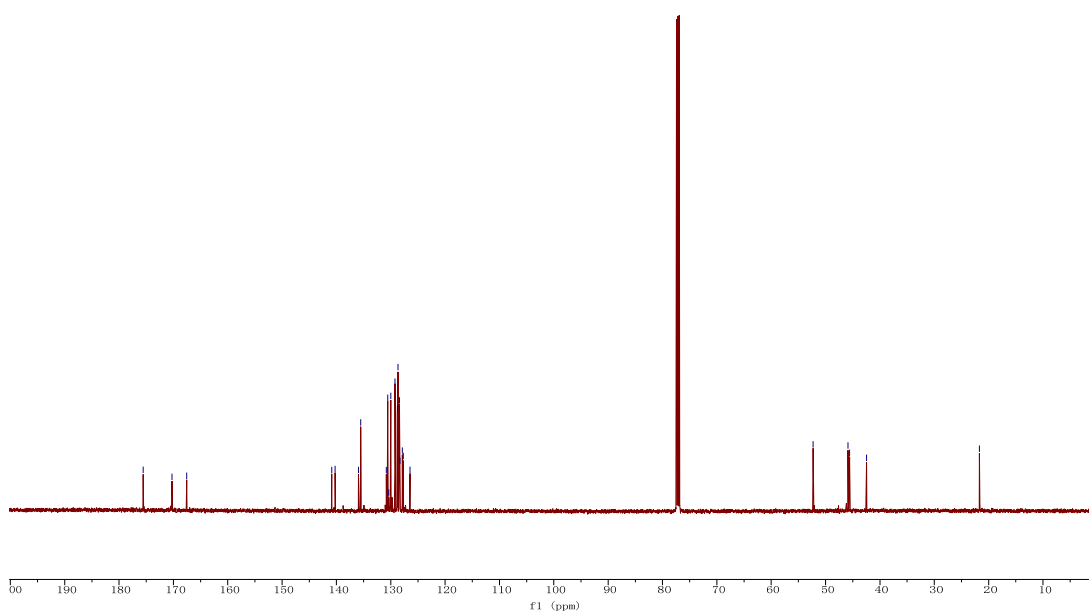



### 3ha

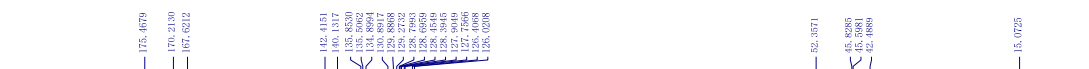



**3ia**

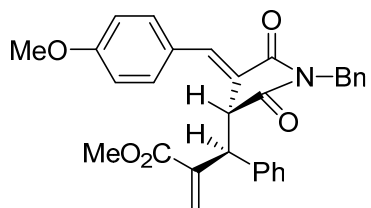

### 3ia

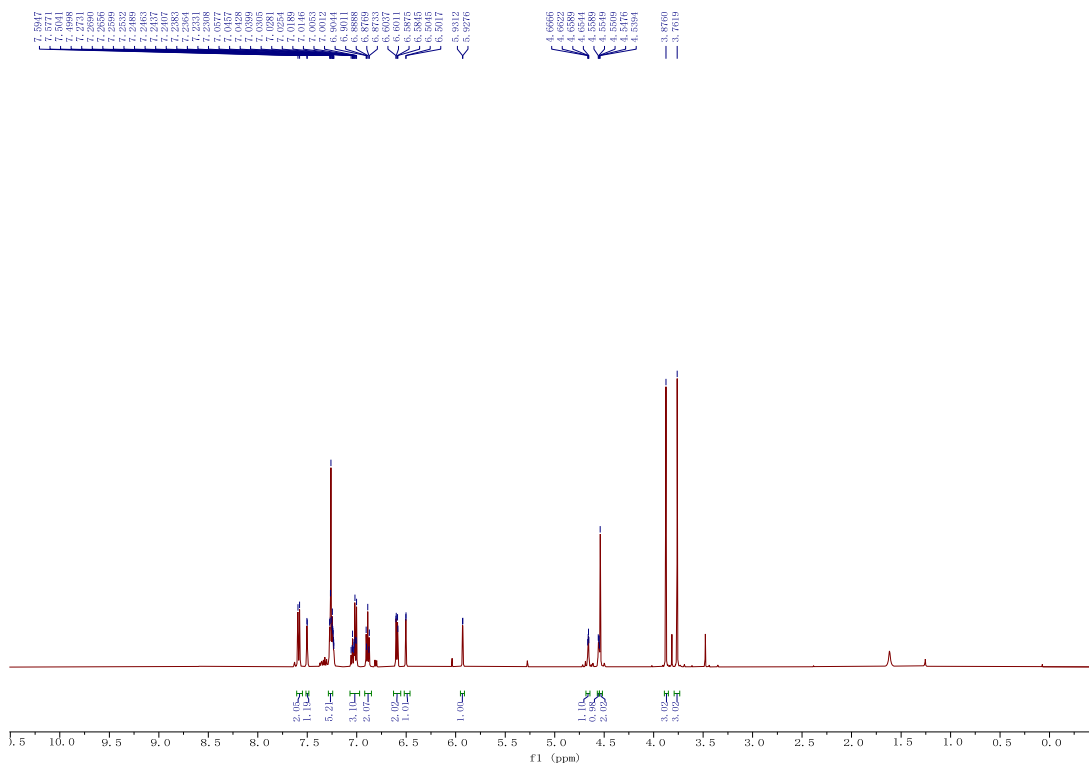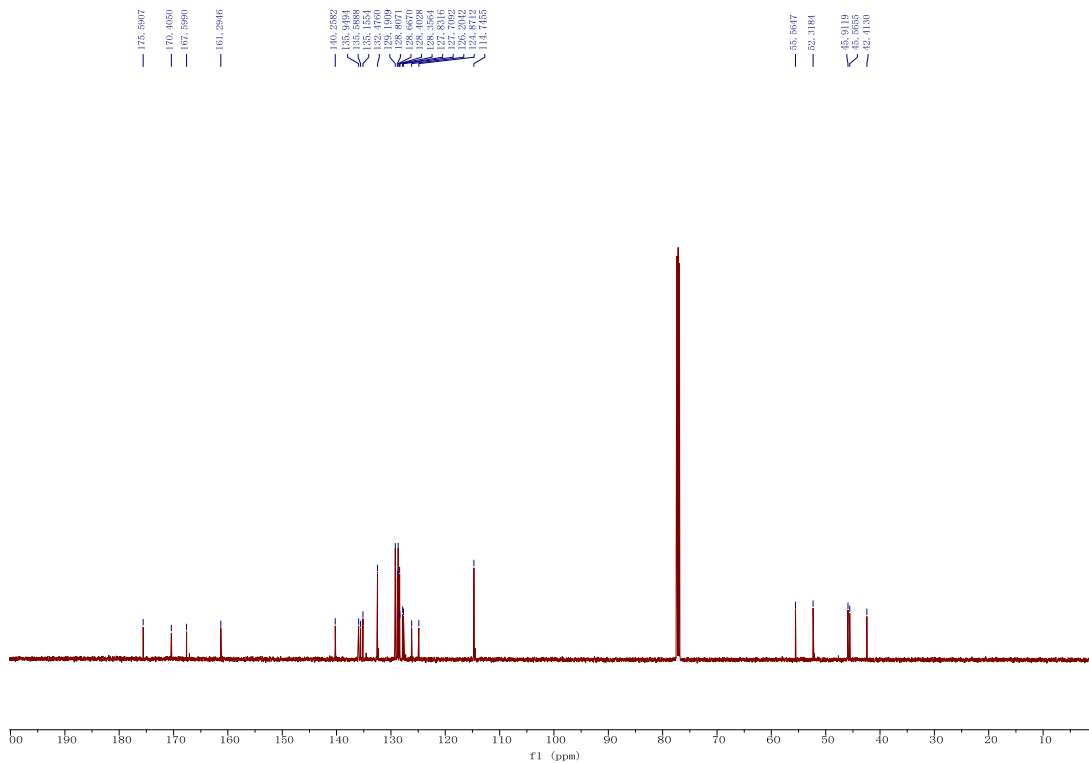



3ja

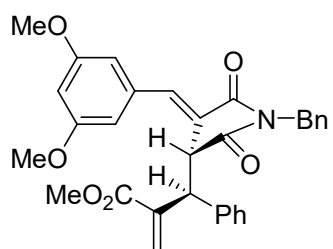

3ja

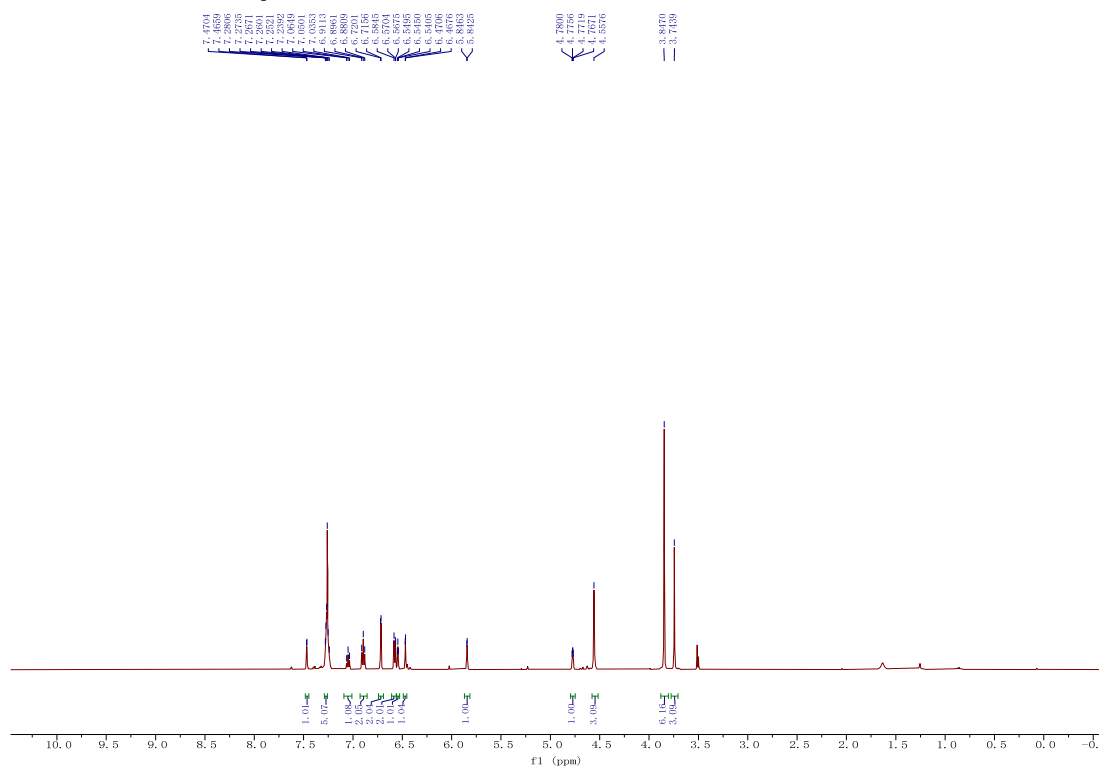



3ka

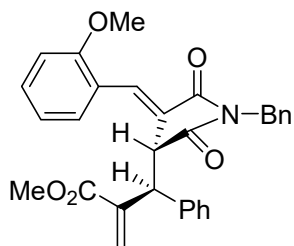

3ka

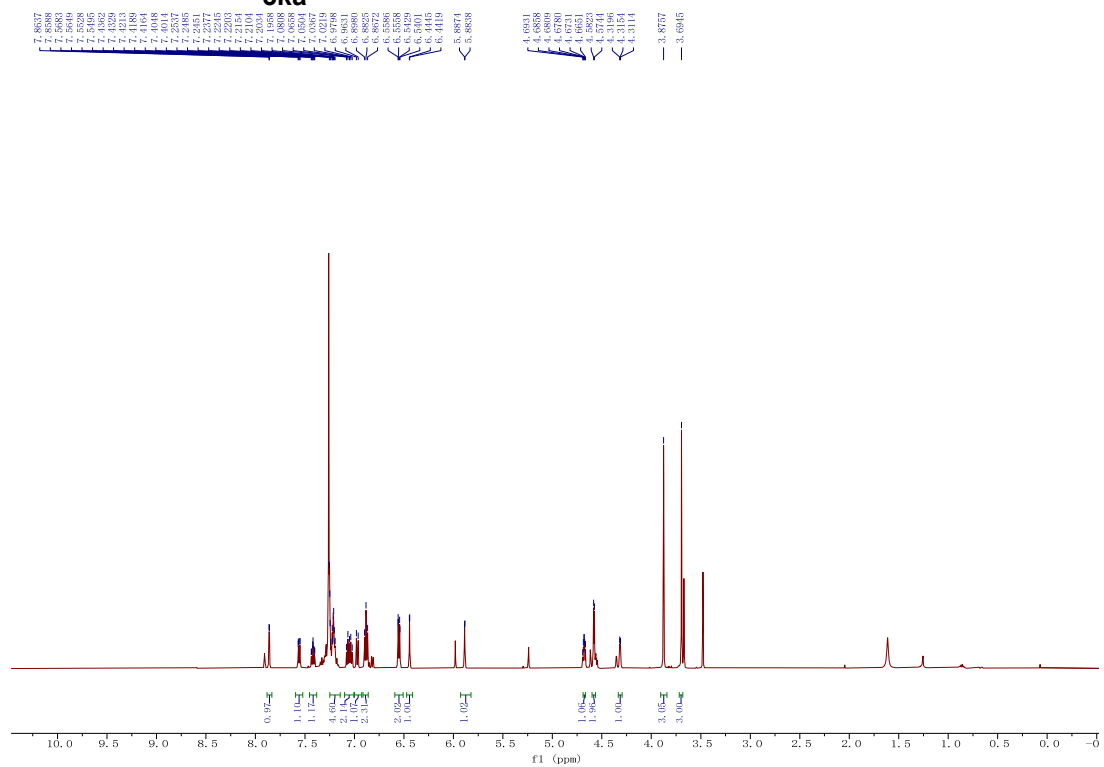



3la

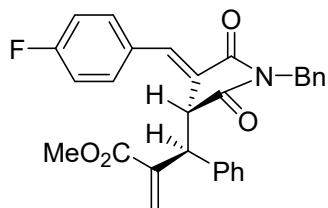

3la

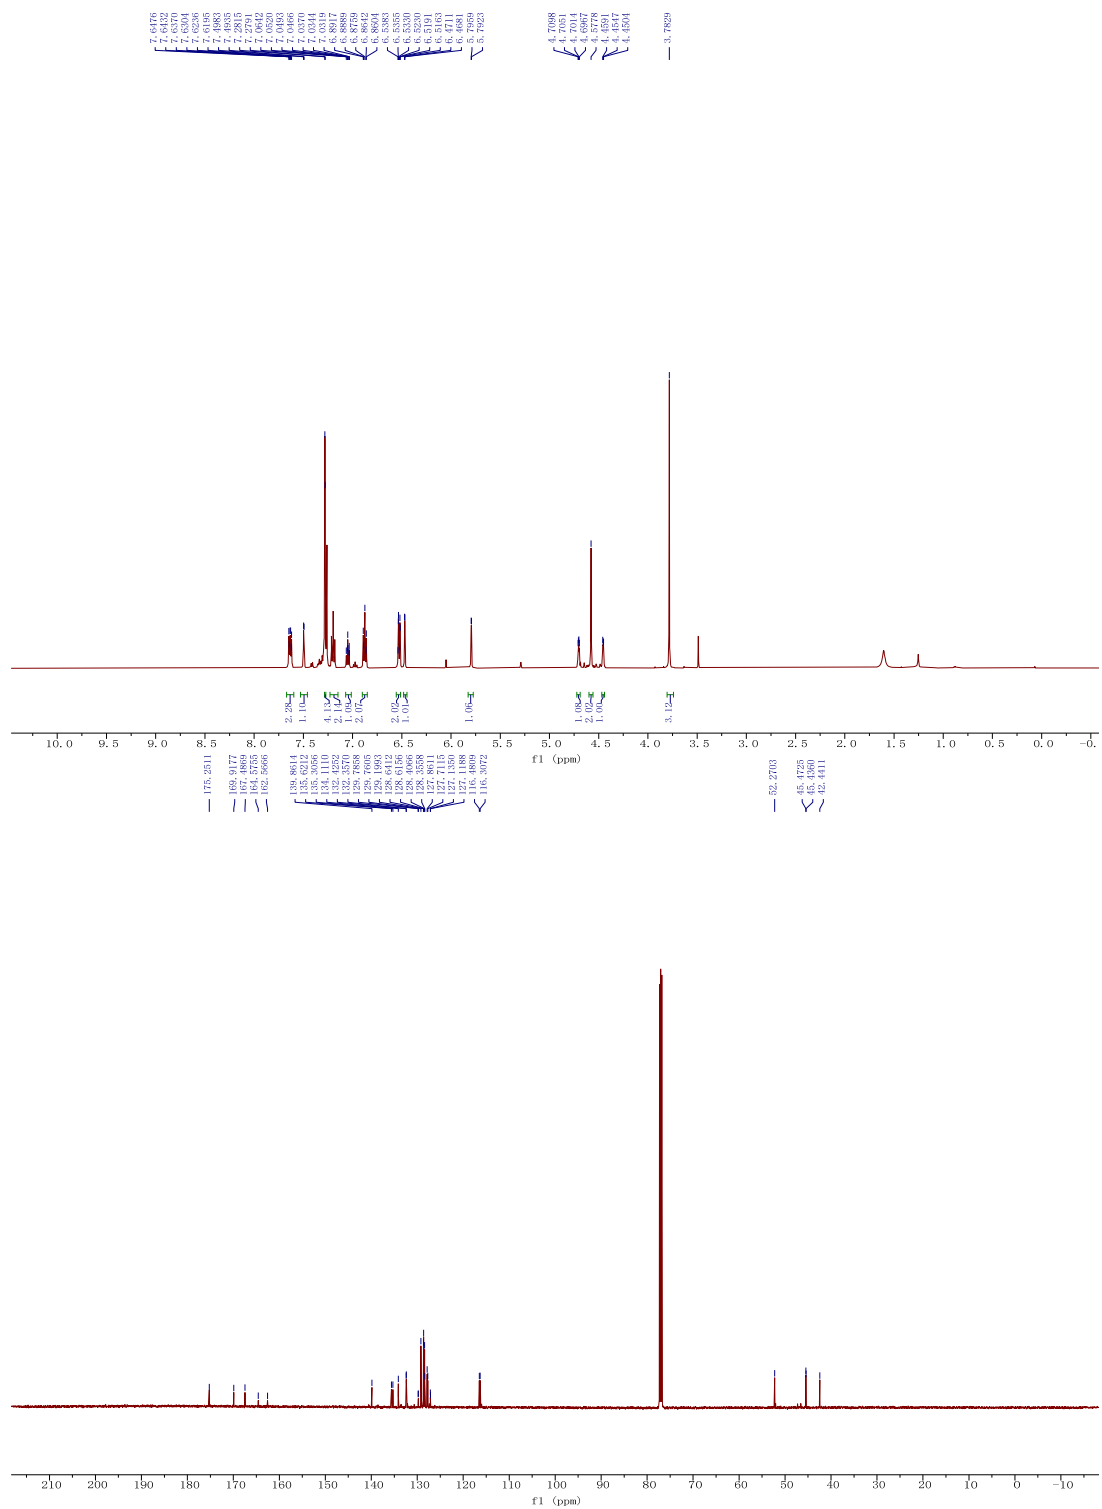



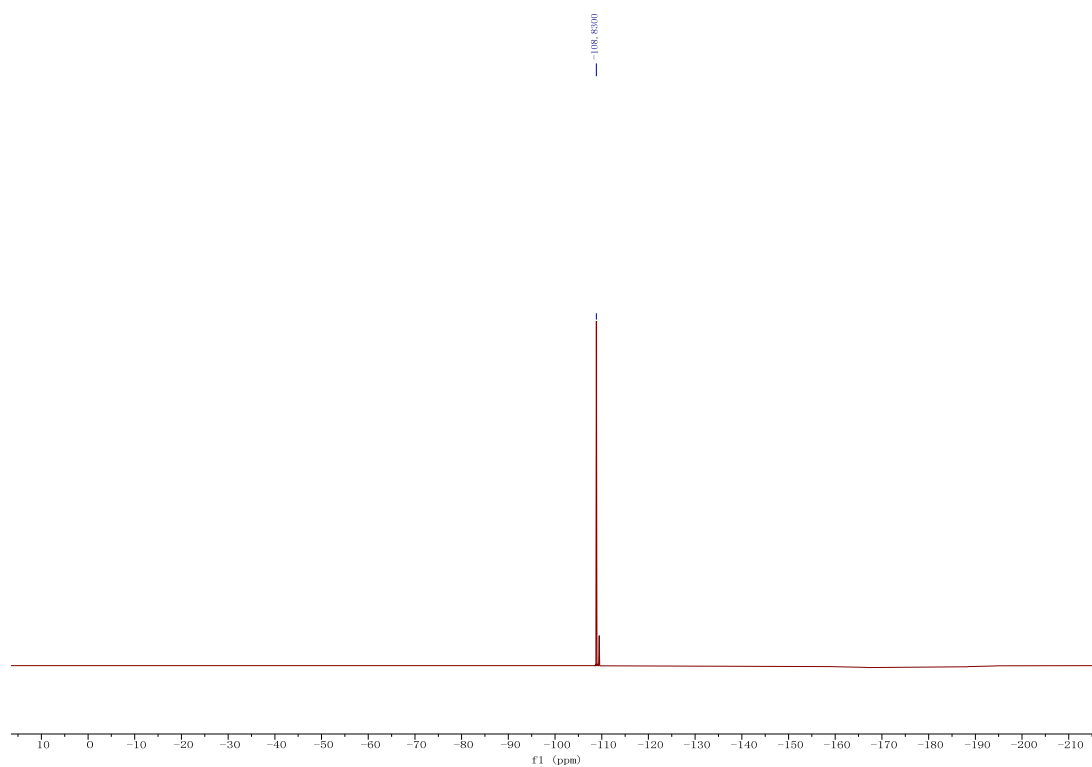



**3ma**

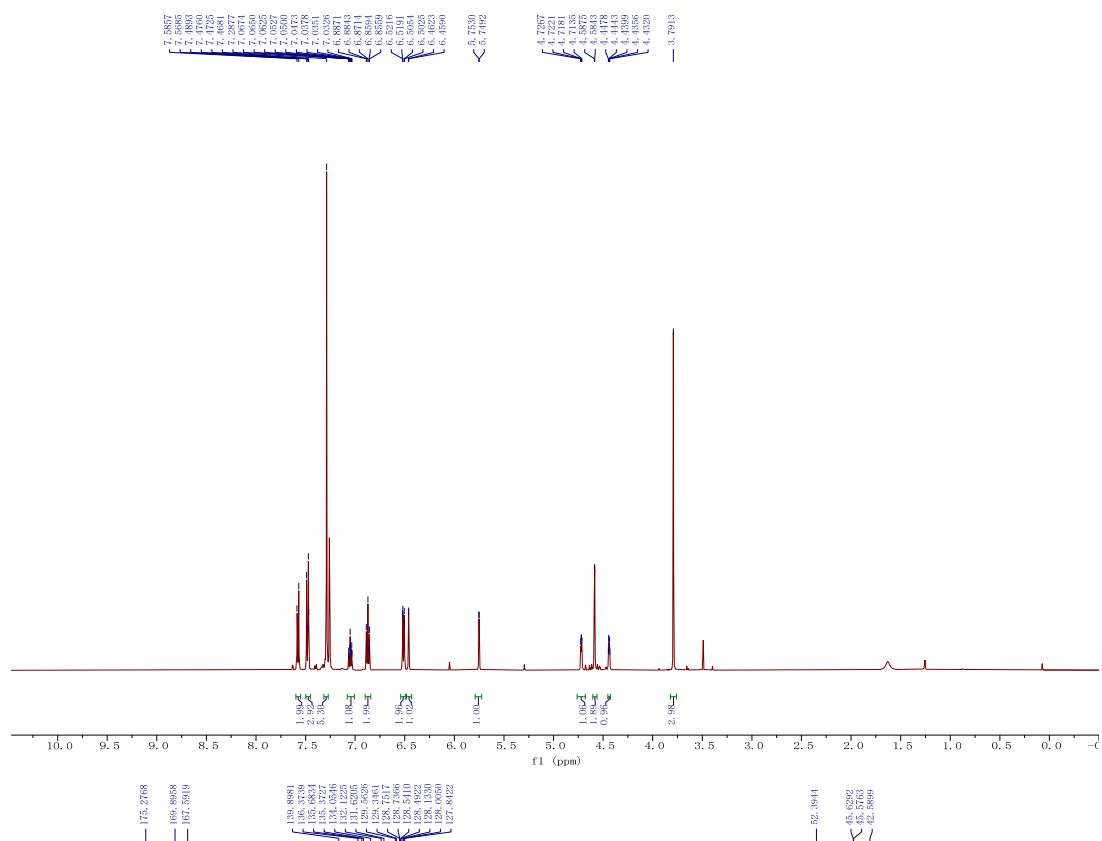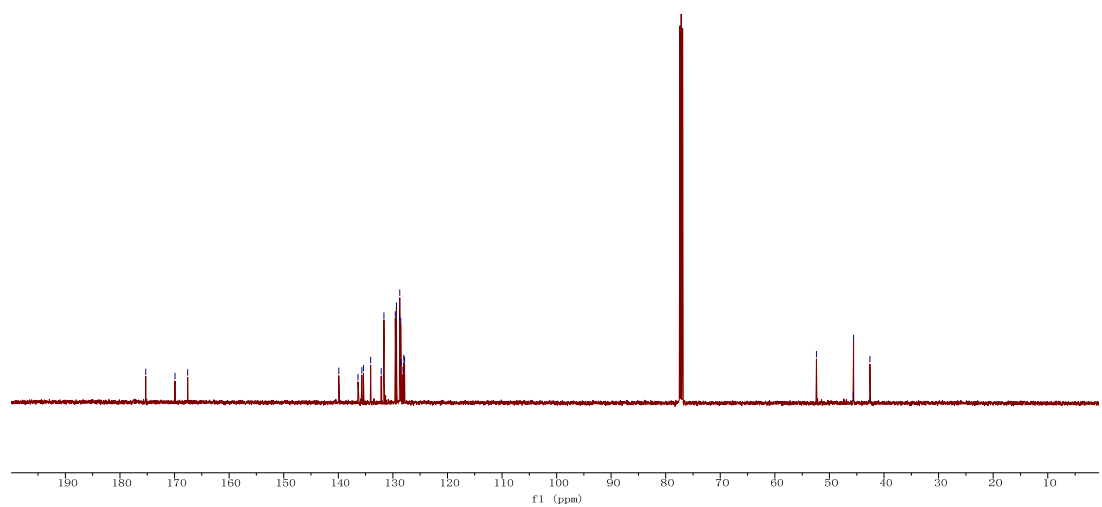







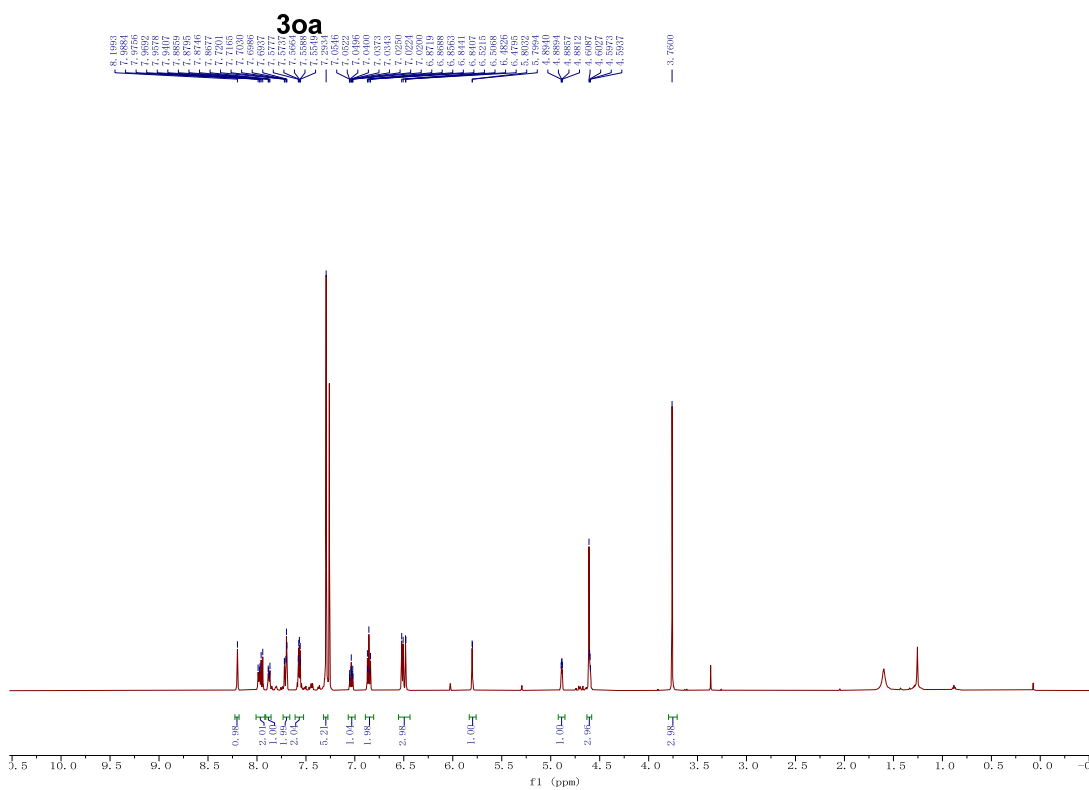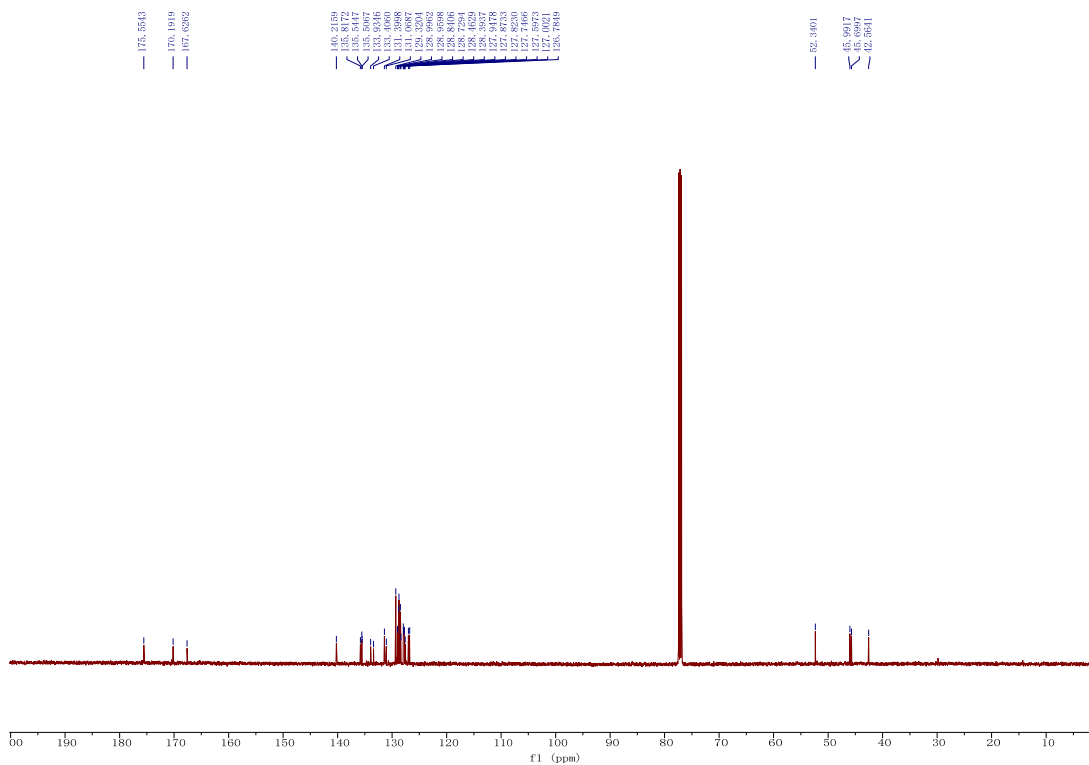



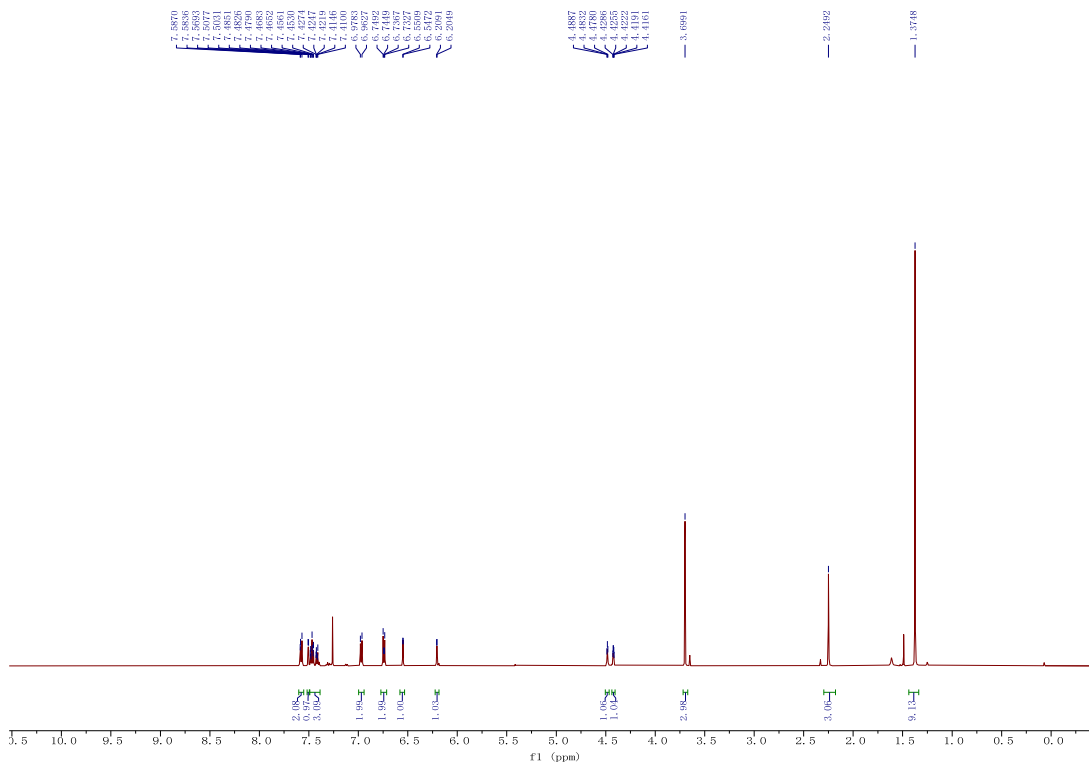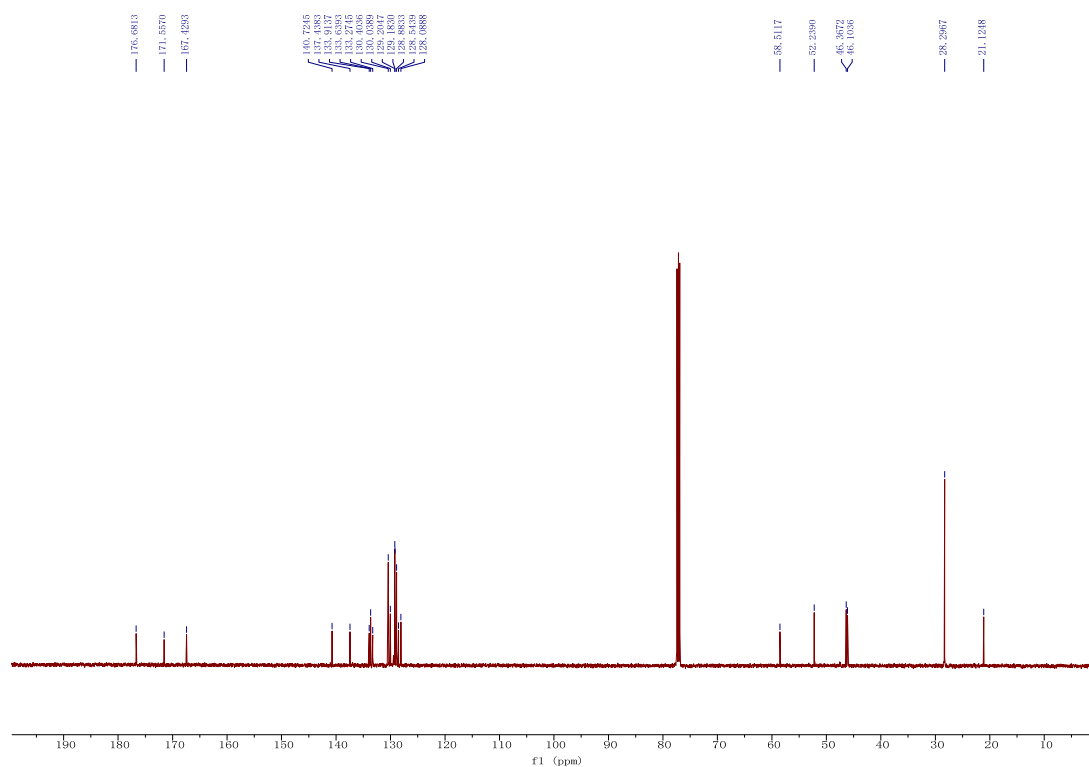



7.5873  
7.5839  
7.5693  
7.5180  
7.5132  
7.4848  
7.4811  
7.4708  
7.4671  
7.4552  
7.4311  
7.4280  
7.4253  
7.4137  
6.7910  
6.7779  
6.7733  
6.7098  
6.7053  
6.6921  
6.5460  
6.5165  
6.2125

$$\begin{array}{r} 4.4826 \\ 4.4771 \\ 4.4719 \\ 4.4164 \\ 4.4133 \\ 4.4103 \\ 4.4072 \\ 4.4039 \end{array} \quad \begin{array}{r} 3.7272 \\ 3.7000 \end{array}$$

— 1.3843

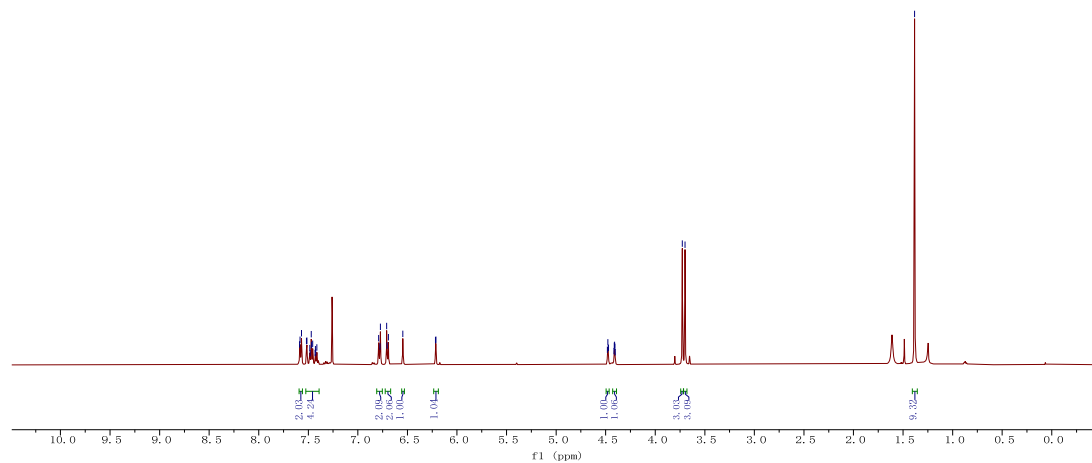

— 176,7276  
— 171,5580  
— 167,4493  
— 159,1736

— 140, 8977  
133, 8980  
133, 6683  
130, 4164  
130, 0992  
130, 0773  
129, 2315  
128, 5899  
128, 3565  
128, 0029

— 113,8904

$$\begin{array}{r} \text{58,5451} \\ \text{55,3479} \\ \text{52,2563} \end{array} \quad \begin{array}{r} \text{46,4779} \\ \text{45,7123} \end{array}$$

— 28,3734

— 28. 3734

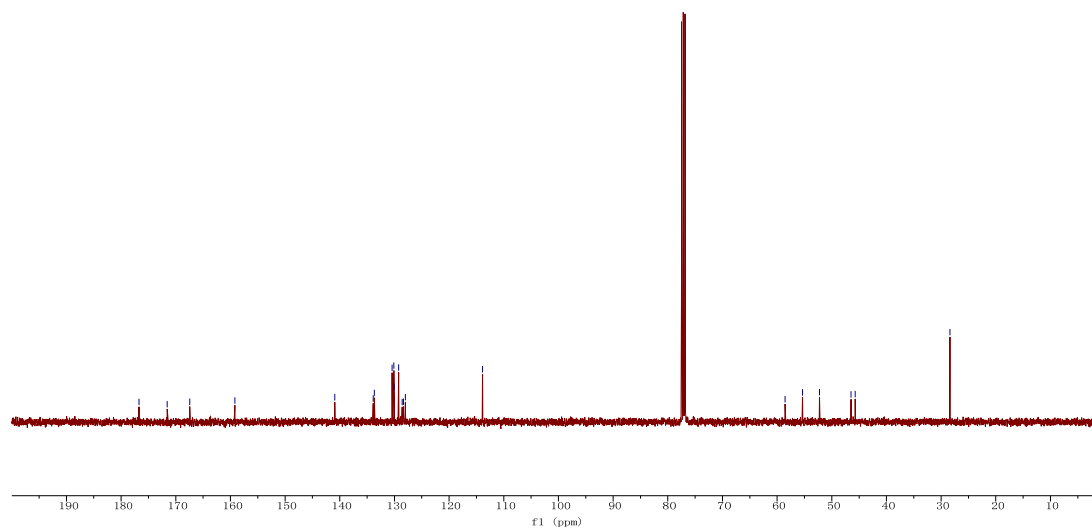



3ed

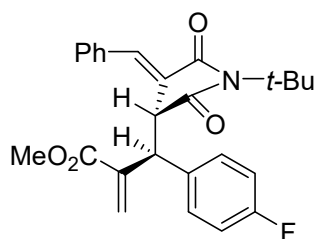

3ed

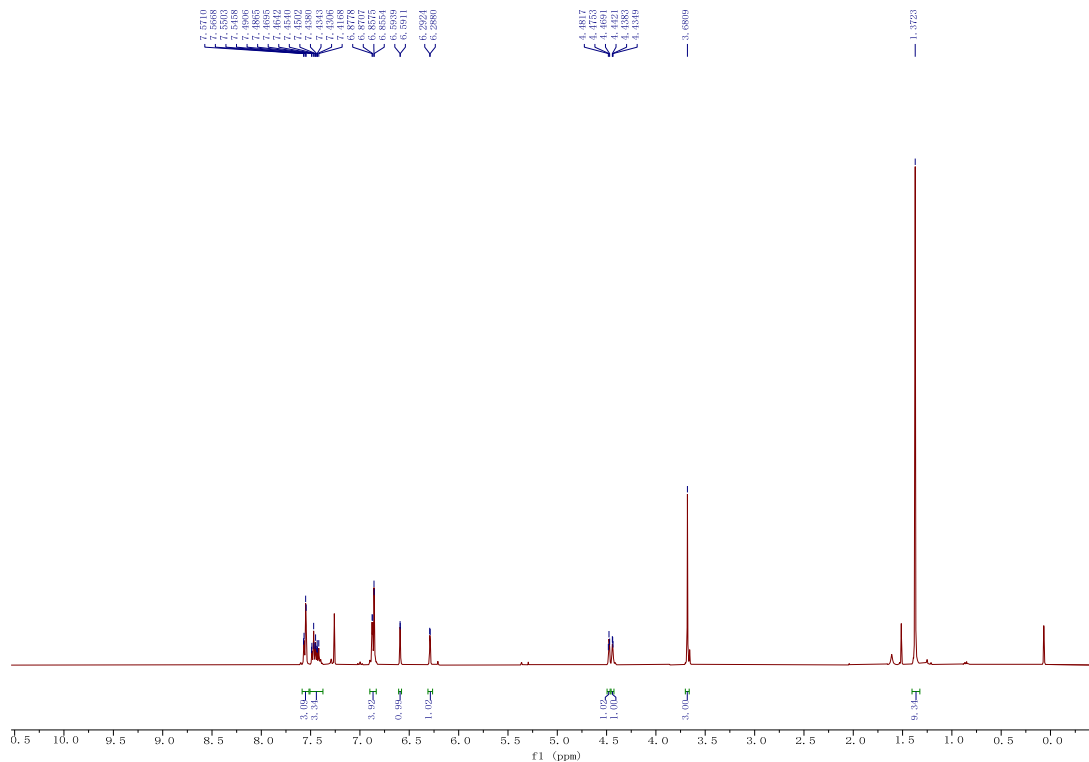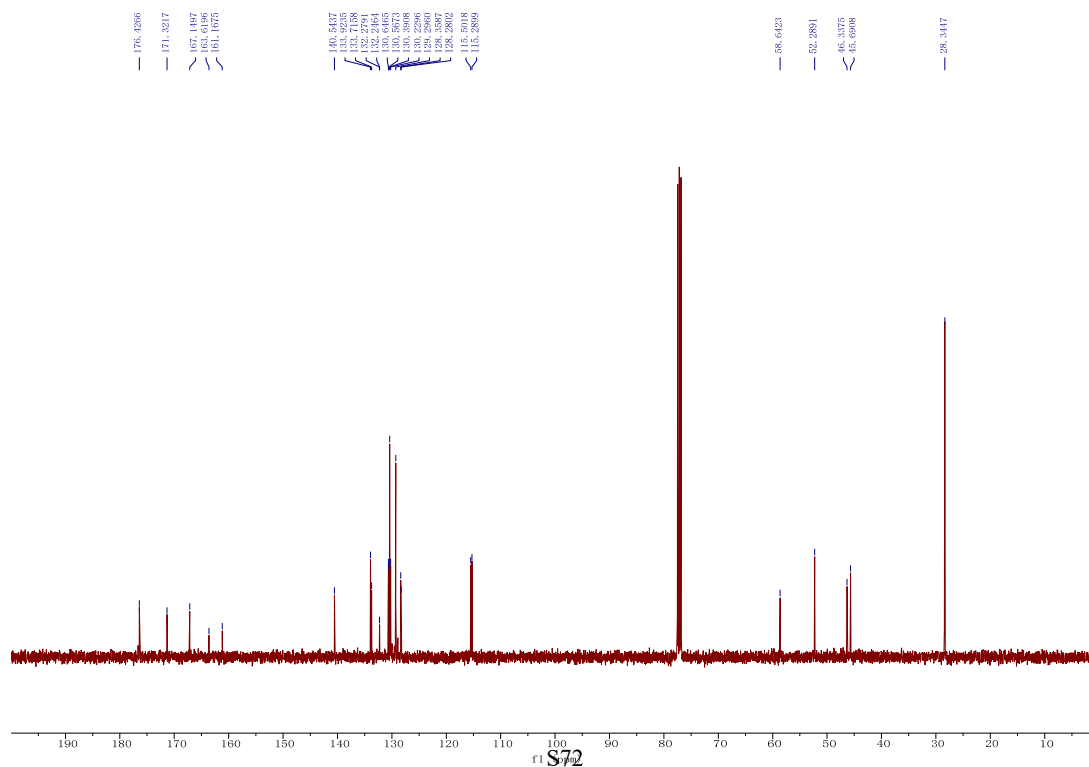



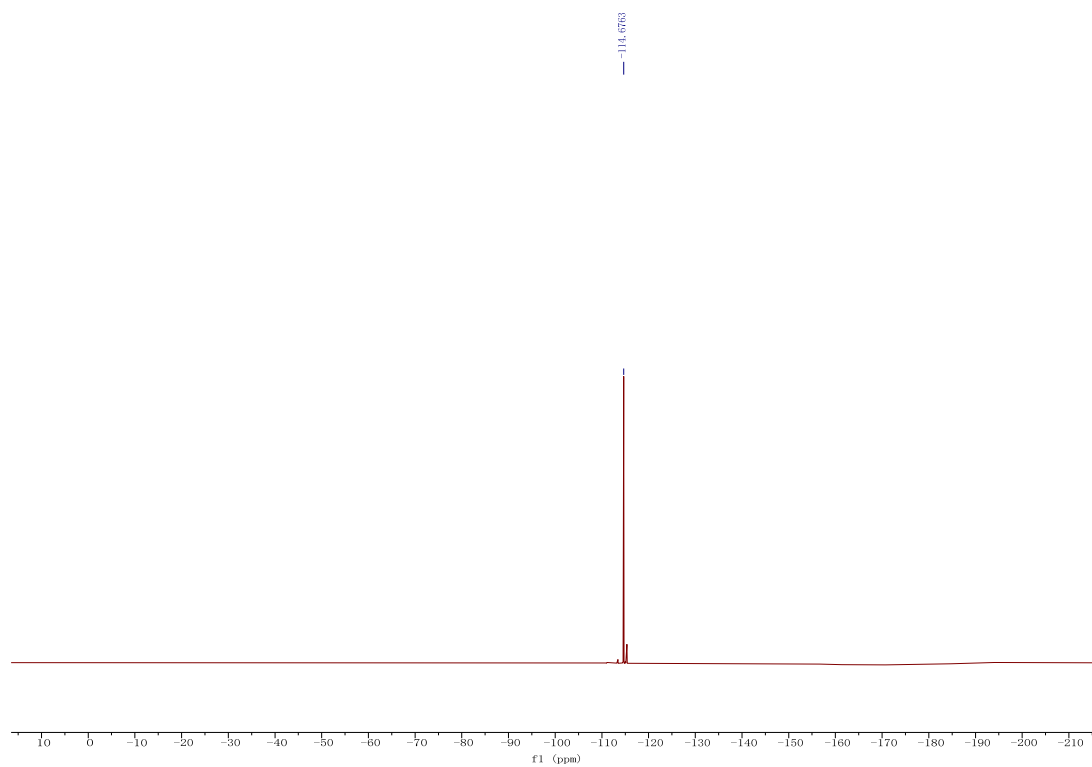



3ee

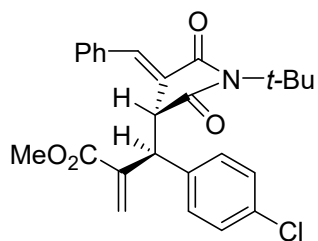

3ee

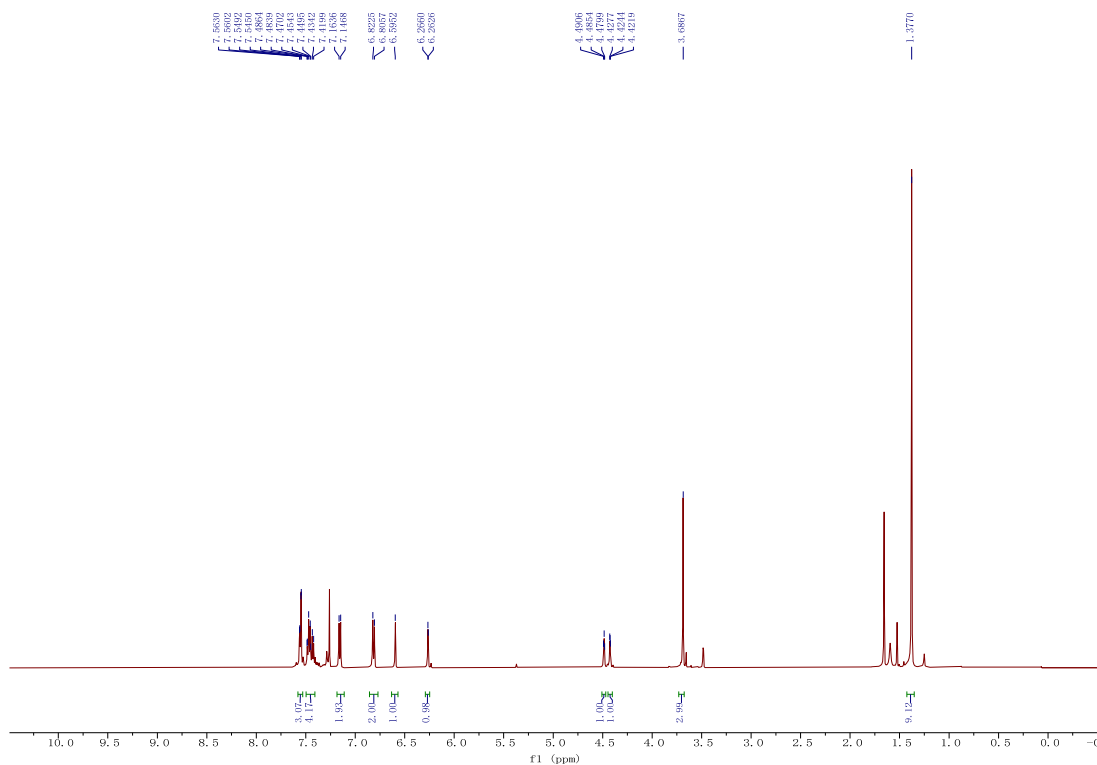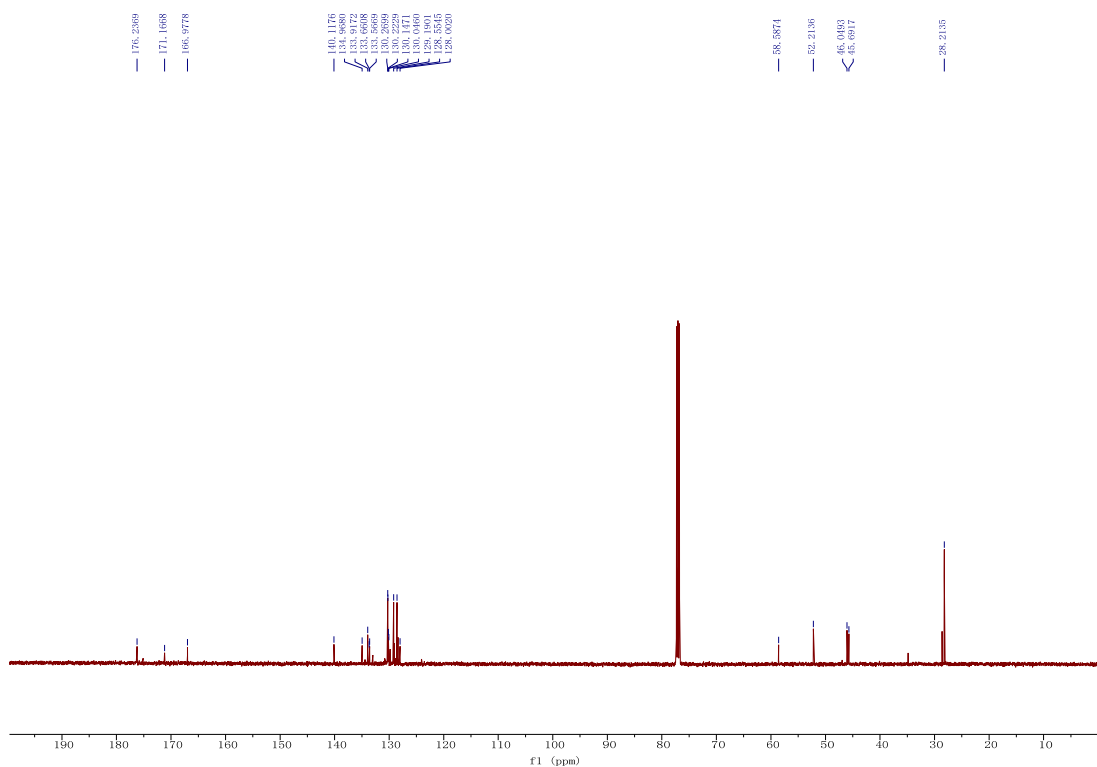



3ef

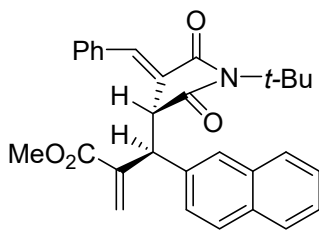

3ef

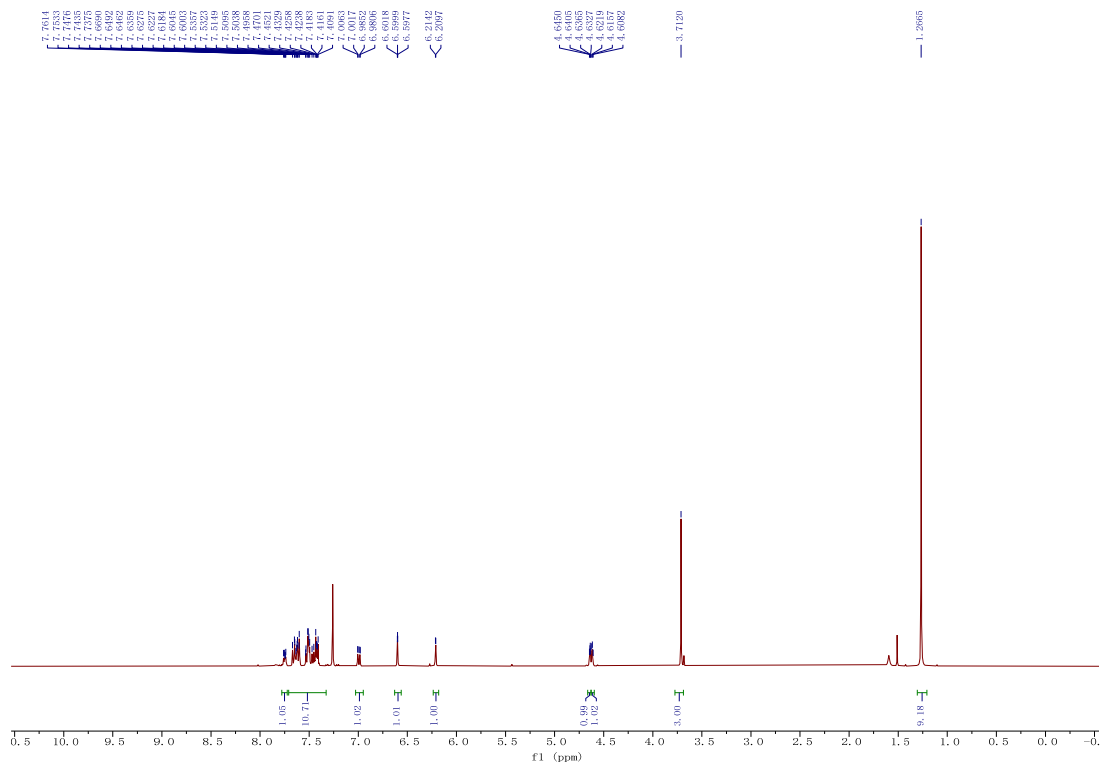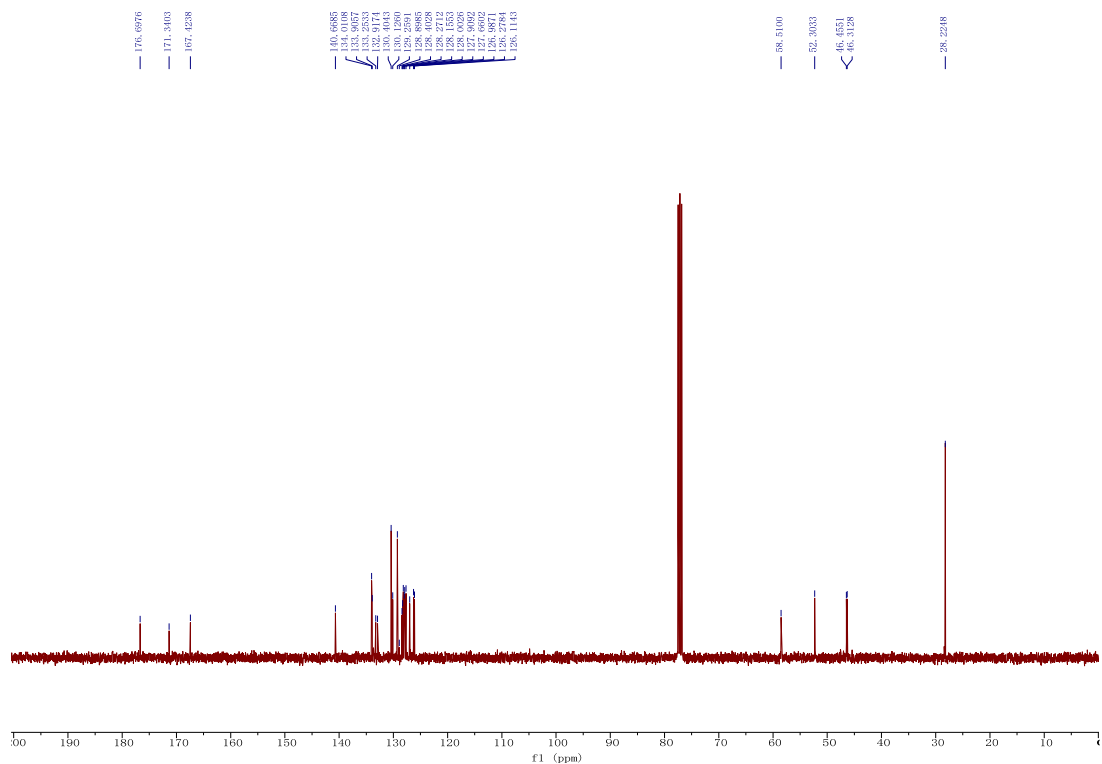



3eg

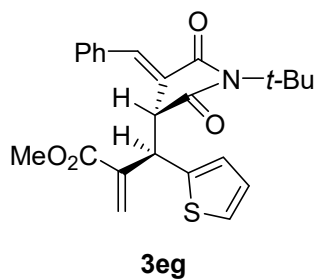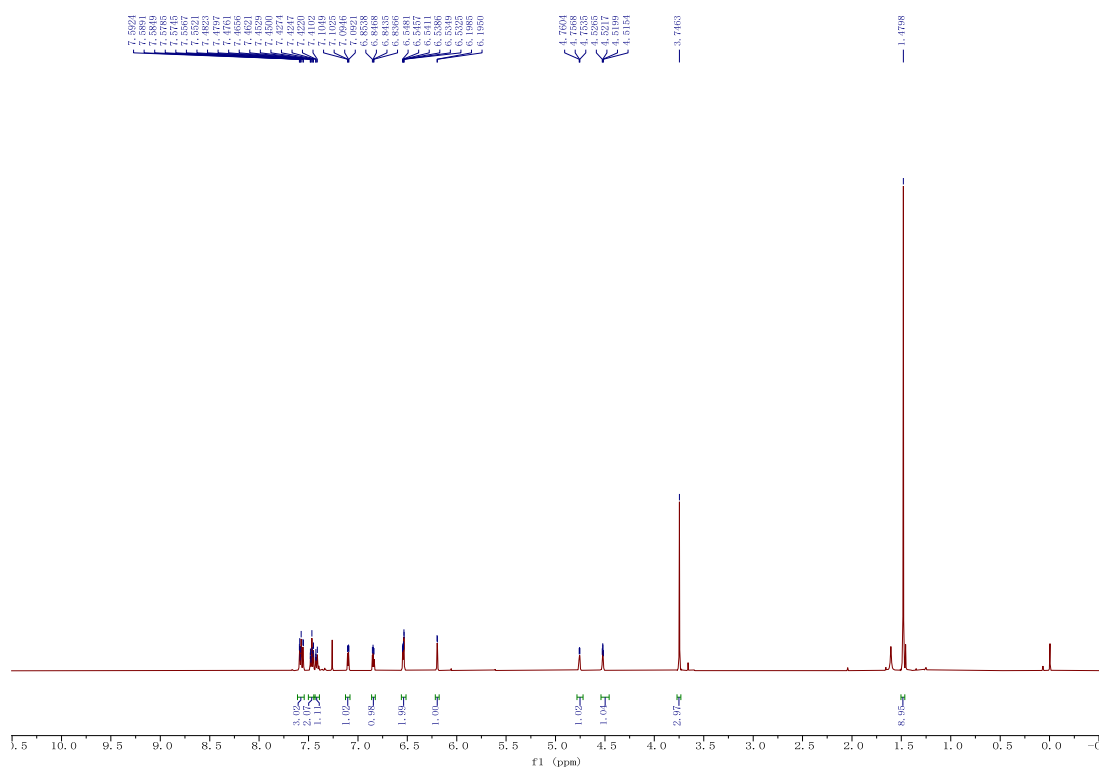



7.5795  
7.5763  
7.5623  
7.5412  
7.5369  
7.4812  
7.4664  
7.4518  
7.4254  
7.4110  
7.1791  
7.1754  
7.1693  
7.1650  
6.8956  
6.8917  
6.8825  
6.8766  
6.6067  
6.3131  
6.3097

4. 4820  
4. 4770  
4. 4724  
4. 4724  
4. 4549  
4. 4496  
4. 1330  
4. 1250  
4. 1189  
4. 1106  
4. 1044  
4. 0964  
4. 0898  
4. 0822

1.3383  
1.1562  
1.1420  
1.1280

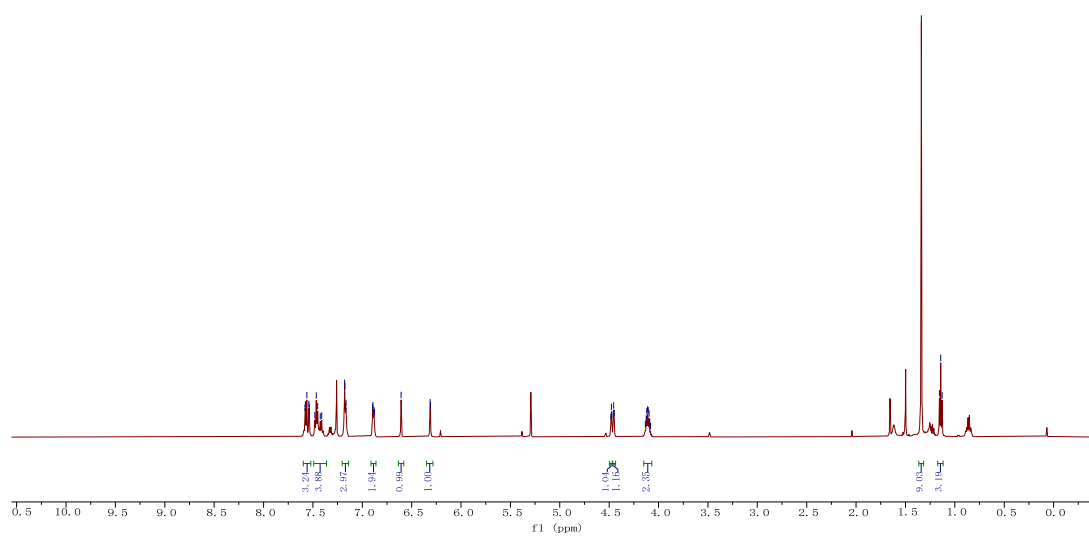

— 176, 5108

— 171.4448

— 166,7575

140, 8909  
136, 5586  
133, 8592  
133, 6300  
130, 4033  
130, 0822  
129, 2334  
129, 0353  
128, 6067  
128, 4672  
128, 0377  
127, 7489

— 61.0208  
— 58.4936

— 58.4936

46.5397  
46.4210

46.4210

— 28. 2752

— 14. 1307

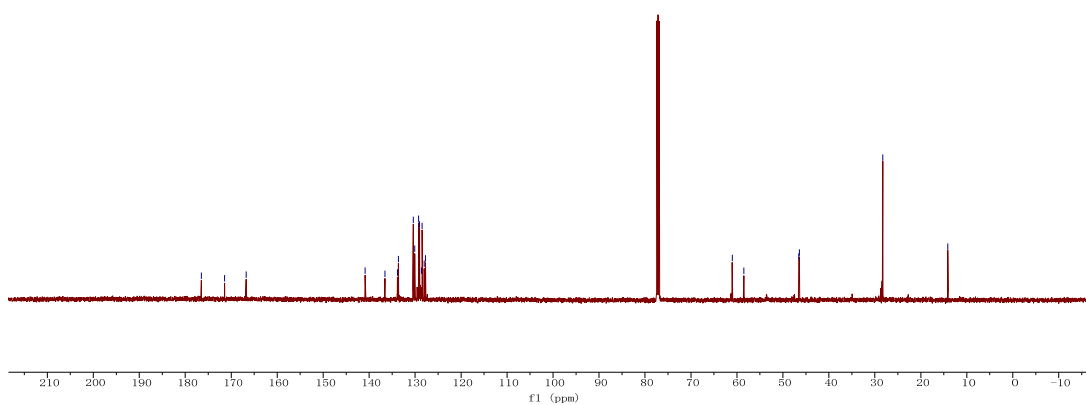



3ei

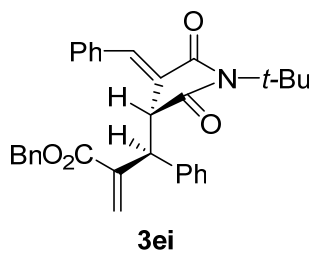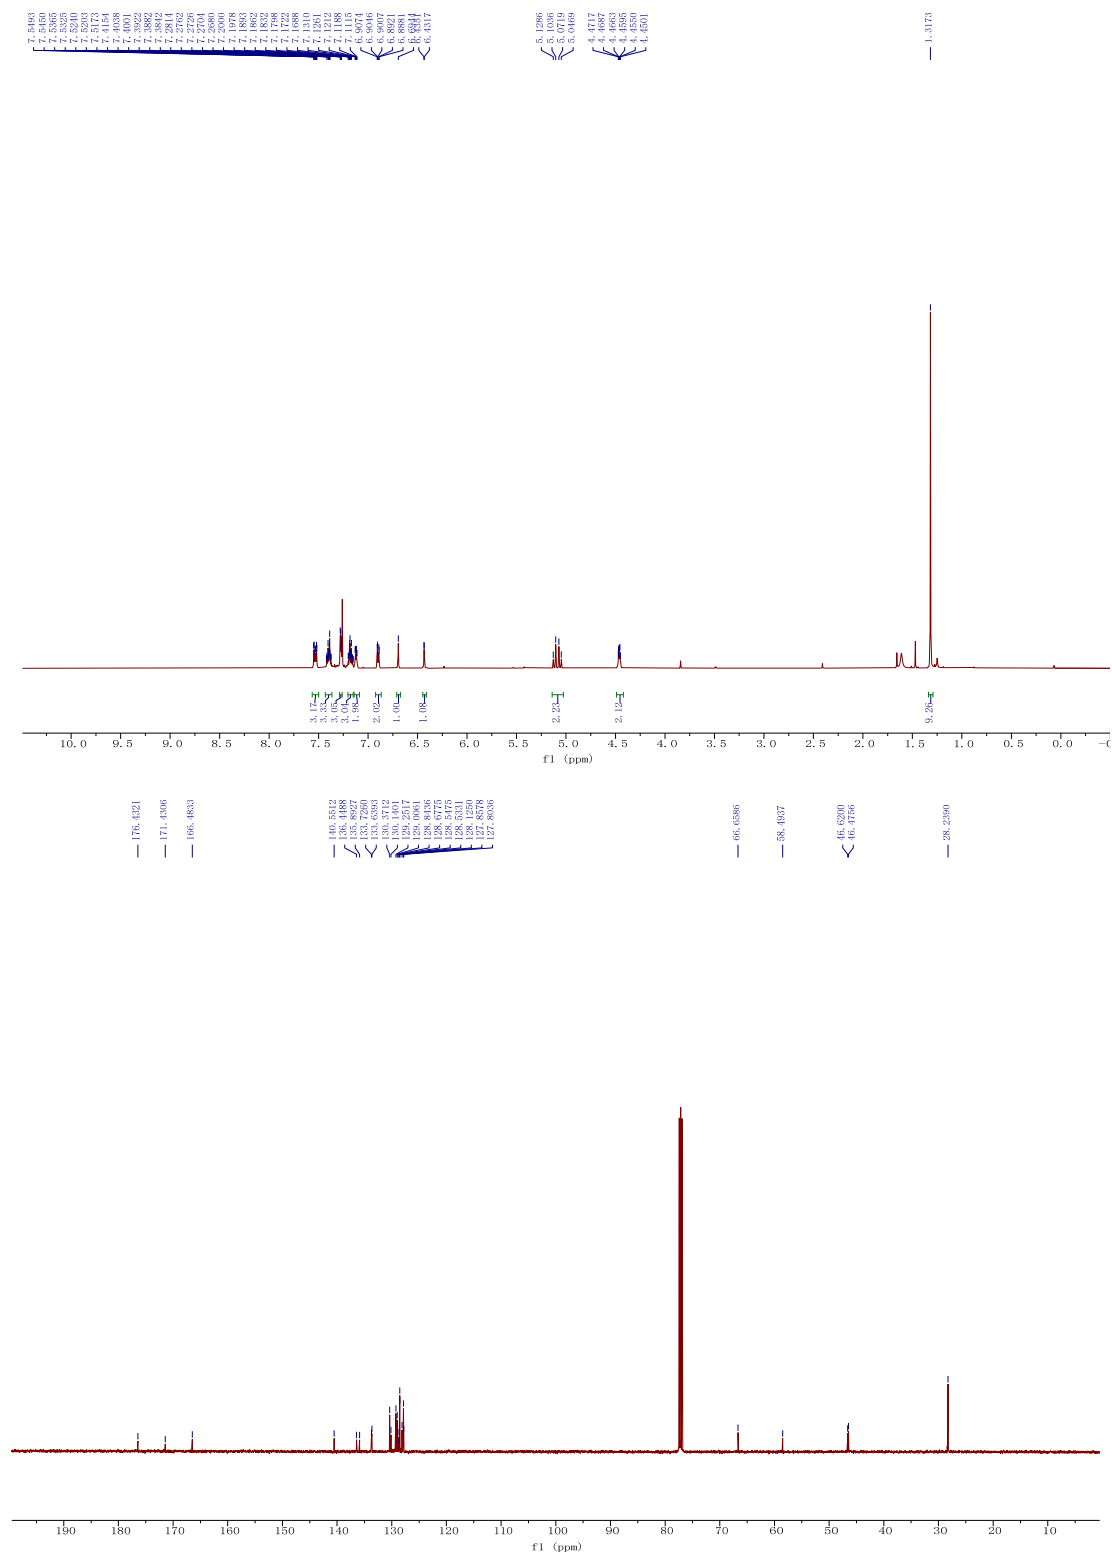



**3ej**

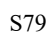



3ek

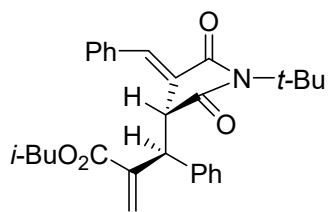

3ek

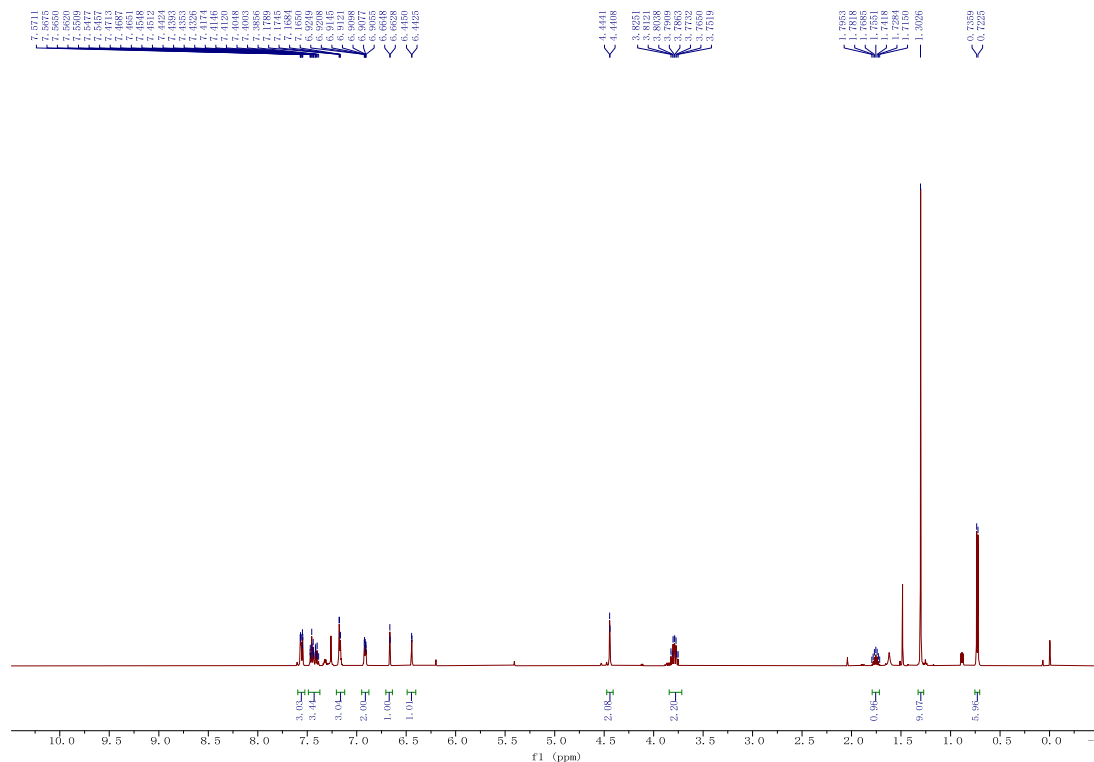



## VII. Copies of Chiral HPLC analysis

3aa-racmic

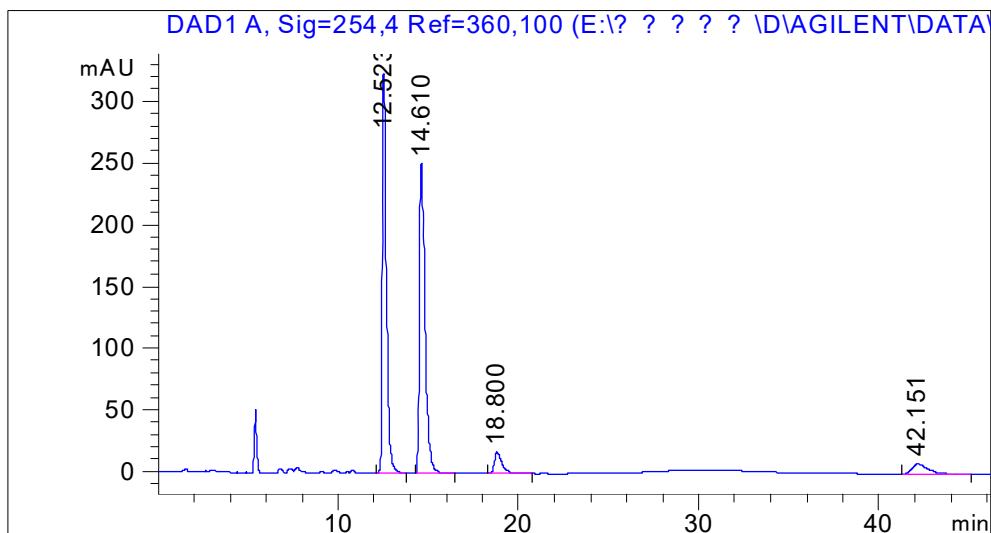

| # | Time   | Area  | Height | Width  | Area%  | Symmetry |
|---|--------|-------|--------|--------|--------|----------|
| 1 | 12.523 | 5296  | 323.6  | 0.247  | 45.664 | 0.572    |
| 2 | 14.61  | 5296  | 251.4  | 0.3178 | 45.664 | 0.474    |
| 3 | 18.8   | 509.5 | 17.4   | 0.4368 | 4.393  | 0.479    |
| 4 | 42.151 | 496.4 | 8.1    | 0.9191 | 4.280  | 0.509    |

3aa-chiral

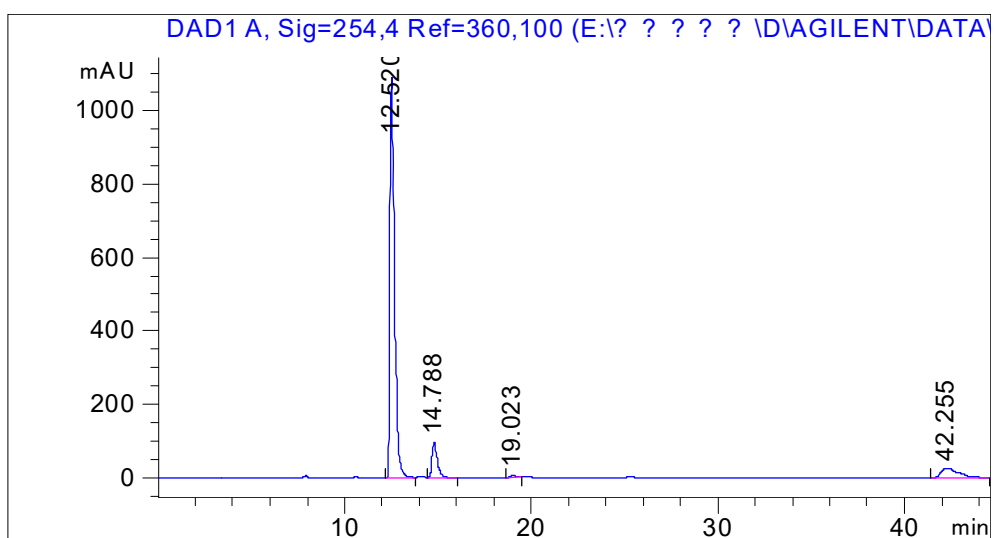



| # | Time   | Area    | Height | Width  | Area%  | Symmetry |
|---|--------|---------|--------|--------|--------|----------|
| 1 | 12.52  | 18383.7 | 1089.4 | 0.2549 | 82.954 | 0.502    |
| 2 | 14.788 | 1953    | 98.2   | 0.302  | 8.812  | 0.58     |
| 3 | 19.023 | 135.3   | 5.8    | 0.3709 | 0.610  | 0.79     |
| 4 | 42.255 | 1689.5  | 25.7   | 0.9562 | 7.624  | 0.425    |

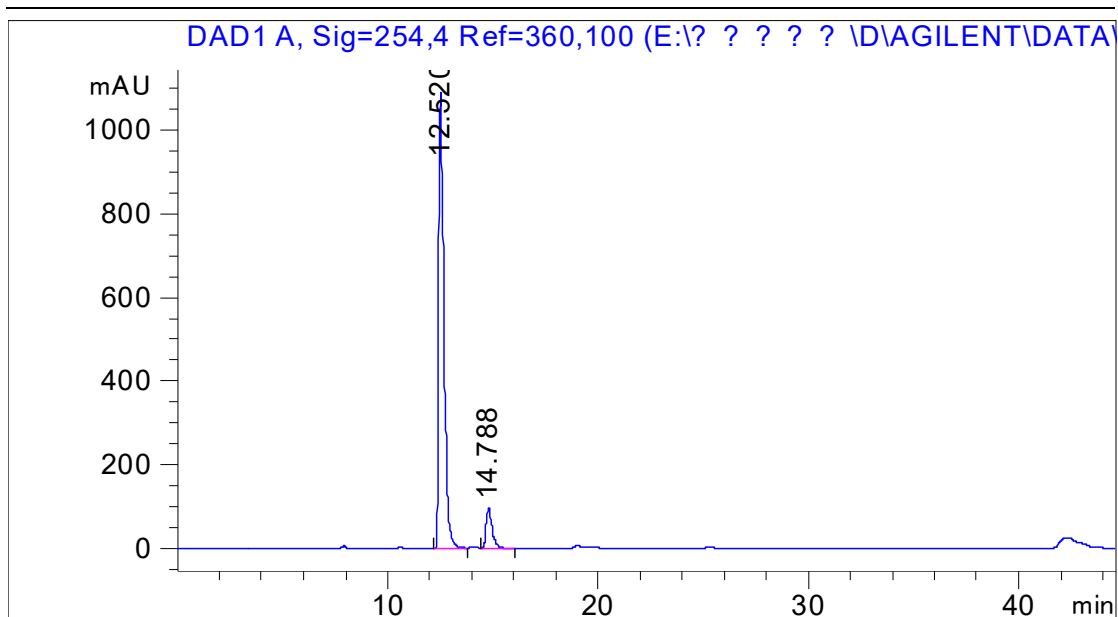

| # | Time   | Area    | Height | Width  | Area%  | Symmetry |
|---|--------|---------|--------|--------|--------|----------|
| 1 | 12.52  | 18383.7 | 1089.4 | 0.2549 | 90.397 | 0.502    |
| 2 | 14.788 | 1953    | 98.2   | 0.302  | 9.603  | 0.58     |



3ba-racmic

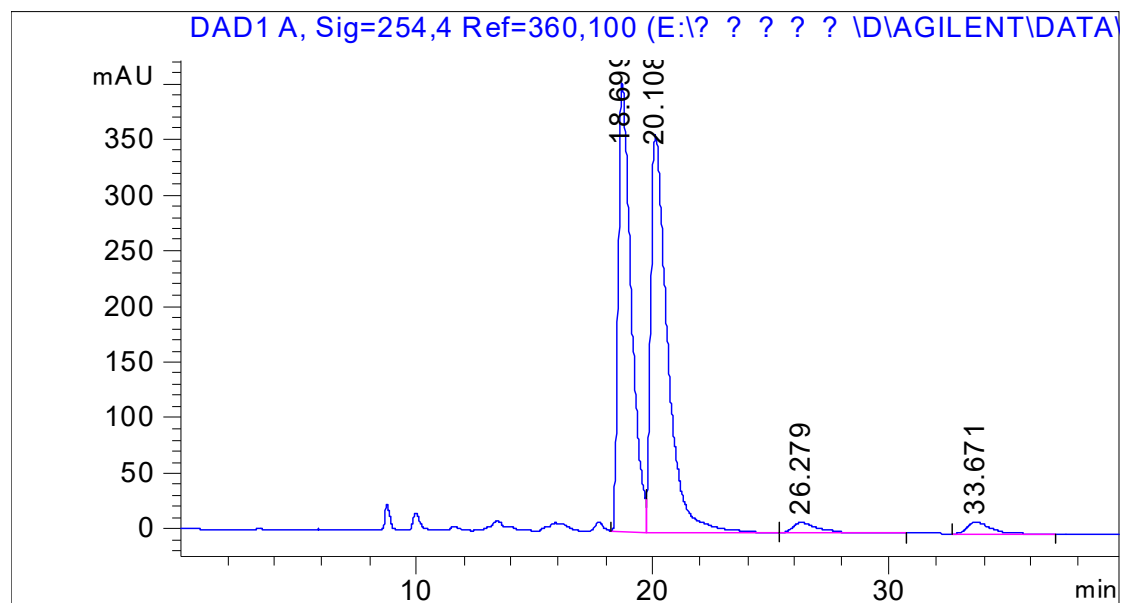

| # | Time   | Area    | Height | Width  | Area%  | Symmetry |
|---|--------|---------|--------|--------|--------|----------|
| 1 | 18.699 | 15608.3 | 403.4  | 0.5814 | 45.295 | 0.406    |
| 2 | 20.108 | 17496.2 | 356.6  | 0.7204 | 50.774 | 0.338    |
| 3 | 26.279 | 659.2   | 8.7    | 1.0637 | 1.913  | 0.431    |
| 4 | 33.671 | 695.3   | 10.3   | 0.9704 | 2.018  | 0.532    |

3ba-chiral

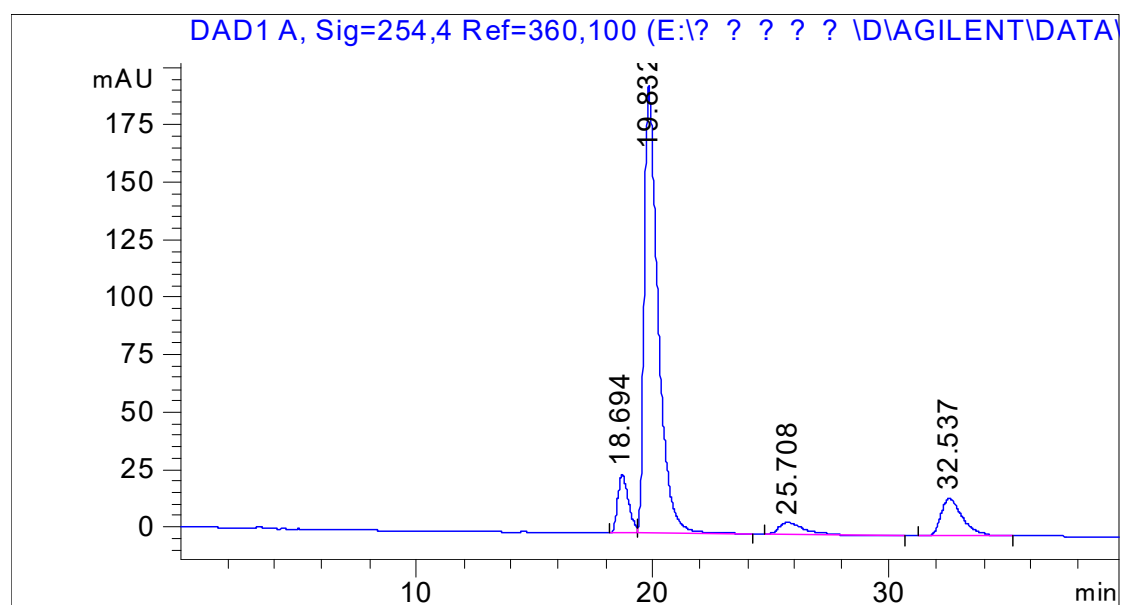



| # | Time   | Area   | Height | Width  | Area%  | Symmetry |
|---|--------|--------|--------|--------|--------|----------|
| 1 | 18.694 | 831.1  | 25.6   | 0.5012 | 8.123  | 0.648    |
| 2 | 19.832 | 7972.2 | 195.1  | 0.6047 | 77.911 | 0.451    |
| 3 | 25.708 | 397.8  | 5.4    | 1.0469 | 3.887  | 0.481    |
| 4 | 32.537 | 1031.3 | 16.2   | 0.9381 | 10.079 | 0.563    |

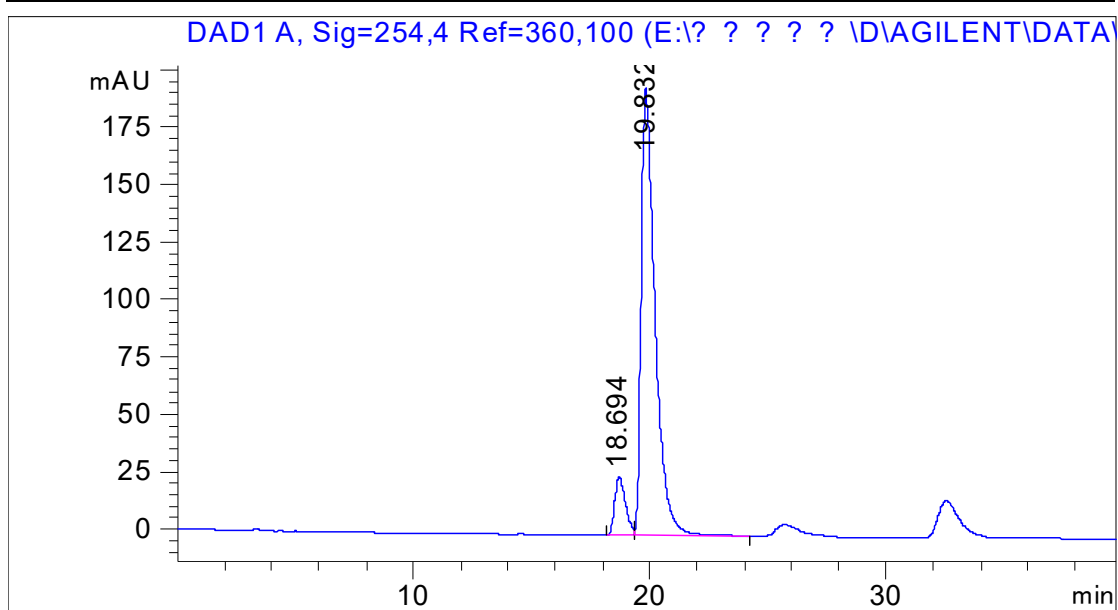

| # | Time   | Area   | Height | Width  | Area%  | Symmetry |
|---|--------|--------|--------|--------|--------|----------|
| 1 | 18.694 | 831.1  | 25.6   | 0.5012 | 9.441  | 0.648    |
| 2 | 19.832 | 7972.2 | 195.1  | 0.6047 | 90.559 | 0.451    |



3ca-racmic

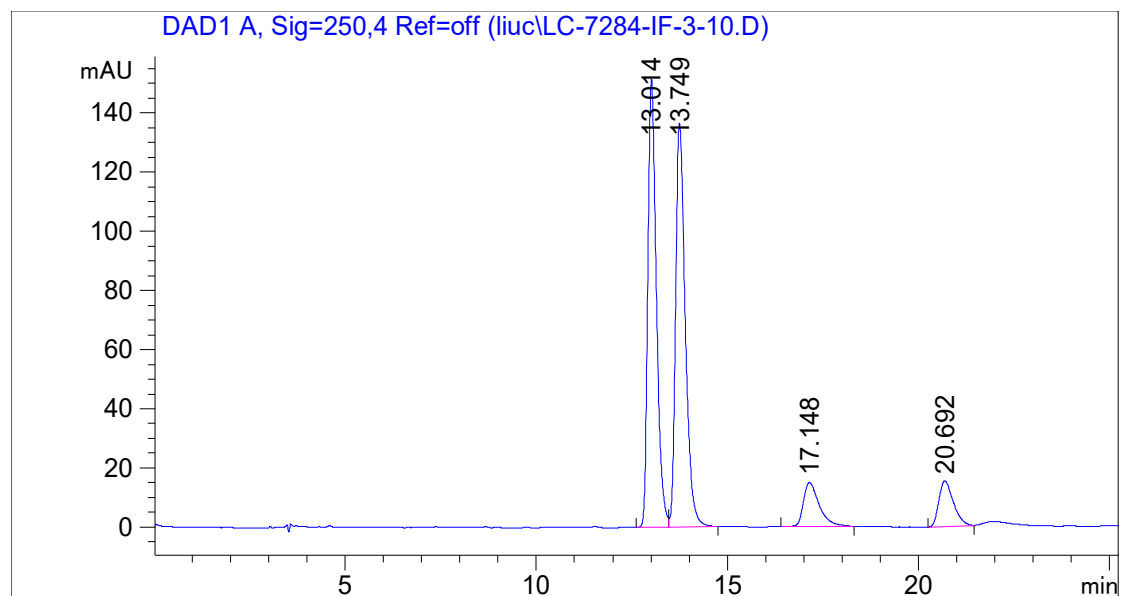

3ca-chiral

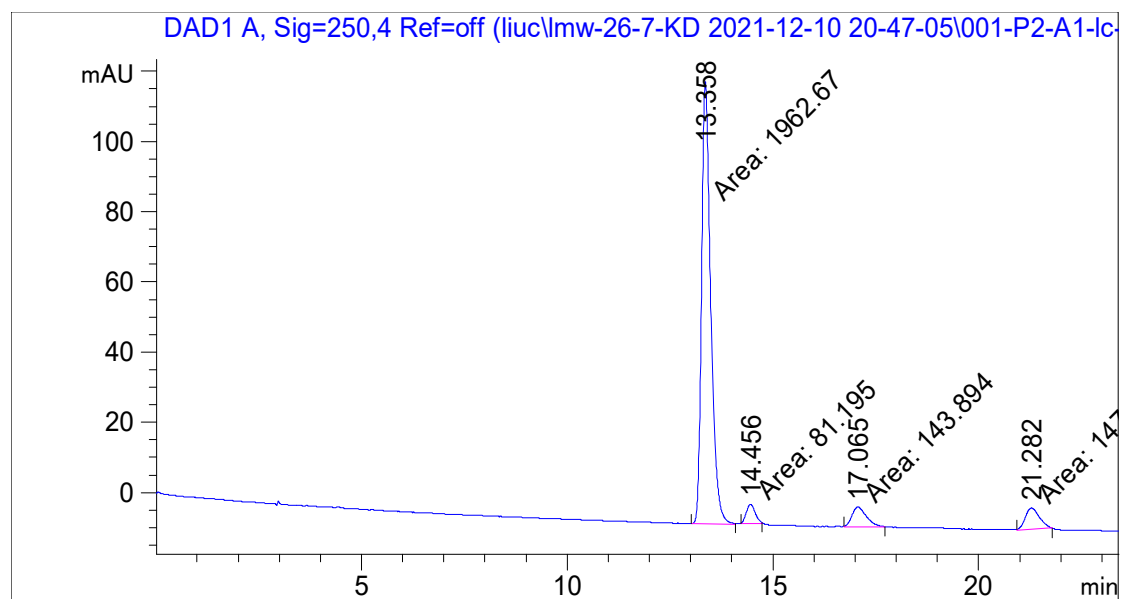



| # | Time   | Area   | Height | Width  | Area%  | Symmetry |
|---|--------|--------|--------|--------|--------|----------|
| 1 | 13.358 | 1962.7 | 126    | 0.2596 | 84.029 | 0.669    |
| 2 | 14.456 | 81.2   | 5.5    | 0.247  | 3.476  | 0.848    |
| 3 | 17.065 | 143.9  | 5.8    | 0.4159 | 6.161  | 0.651    |
| 4 | 21.282 | 148    | 6.1    | 0.4038 | 6.334  | 0.739    |

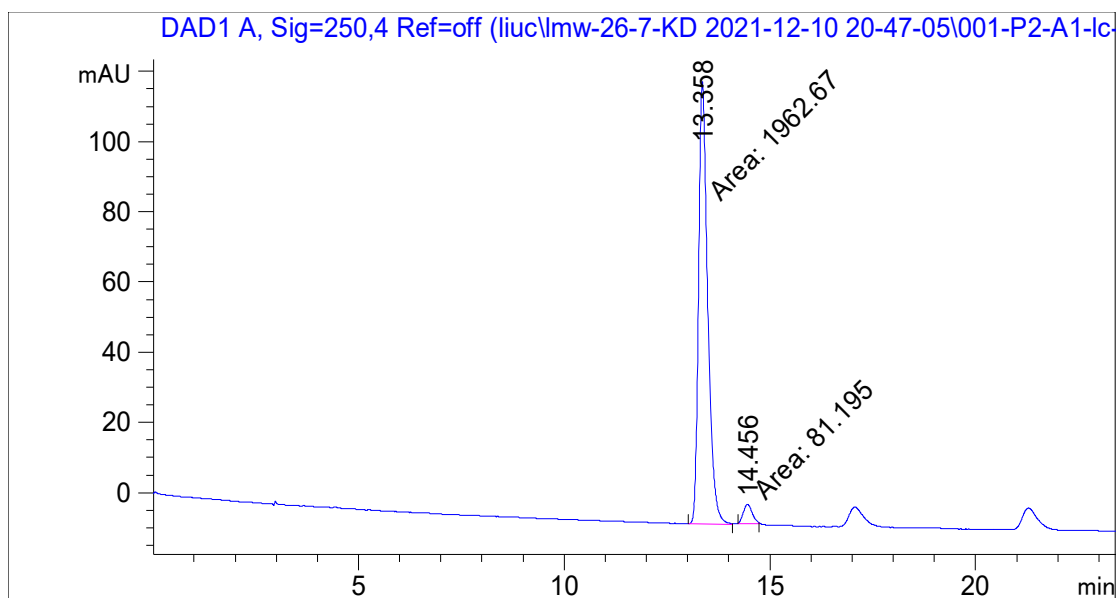

| # | Time   | Area   | Height | Width  | Area%  | Symmetry |
|---|--------|--------|--------|--------|--------|----------|
| 1 | 13.358 | 1962.7 | 126    | 0.2596 | 96.027 | 0.669    |
| 2 | 14.456 | 81.2   | 5.5    | 0.247  | 3.973  | 0.848    |



3da-racmic

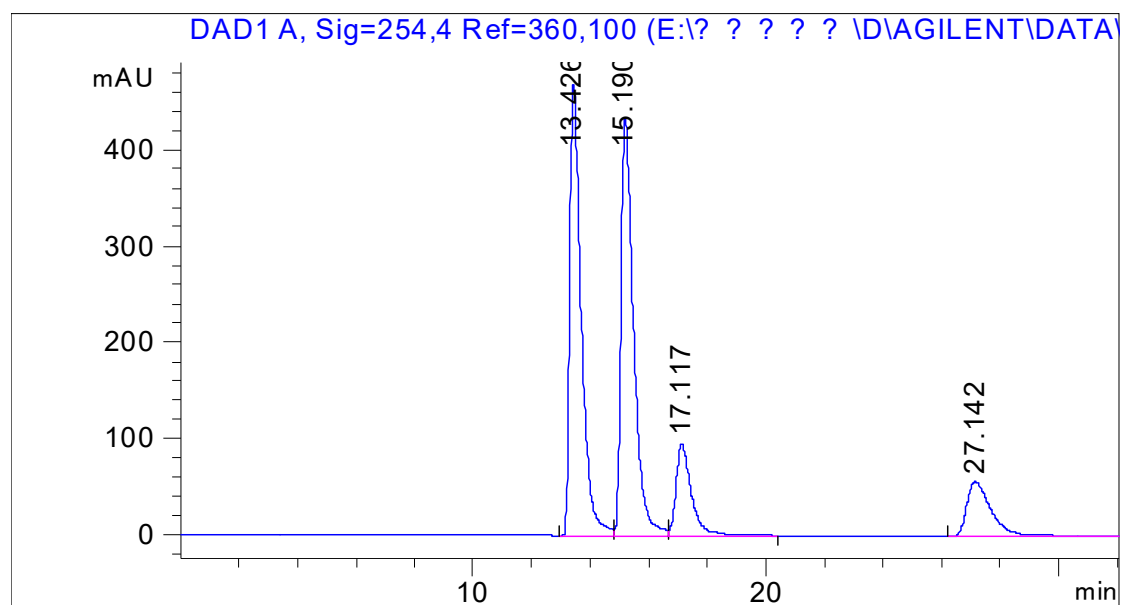

| # | Time   | Area    | Height | Width  | Area%  | Symmetry |
|---|--------|---------|--------|--------|--------|----------|
| 1 | 13.426 | 12792.9 | 468.2  | 0.4008 | 39.520 | 0.429    |
| 2 | 15.19  | 12975.7 | 432    | 0.4444 | 40.084 | 0.453    |
| 3 | 17.117 | 3455.1  | 95.6   | 0.5336 | 10.674 | 0.525    |
| 4 | 27.142 | 3147.3  | 56.6   | 0.9261 | 9.723  | 0.514    |

3da-chiral

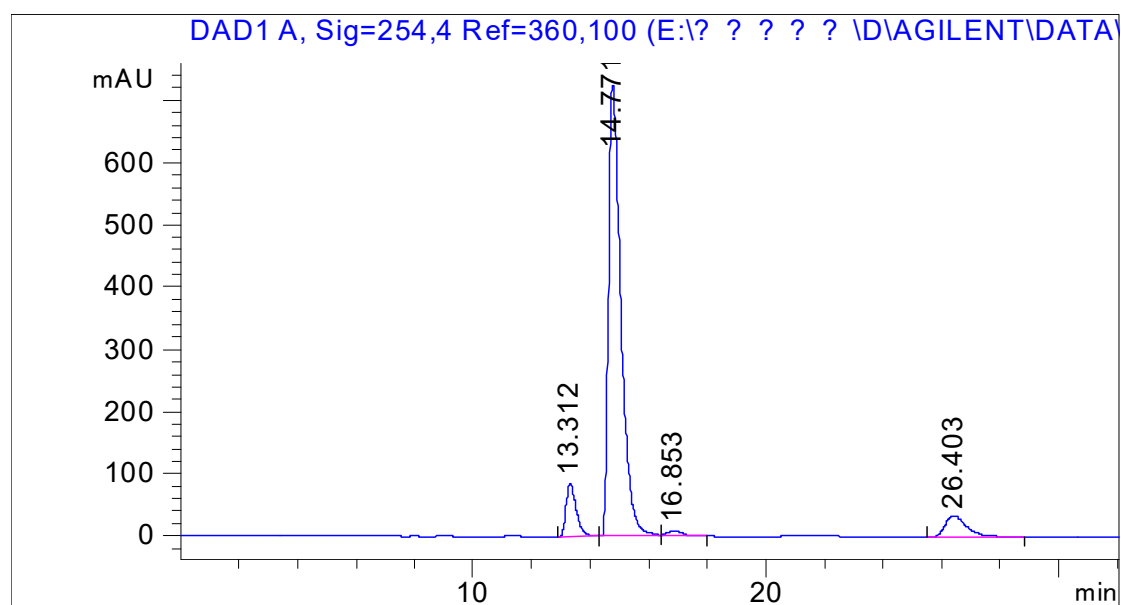



| # | Time   | Area   | Height | Width  | Area%  | Symmetry |
|---|--------|--------|--------|--------|--------|----------|
| 1 | 13.312 | 2037.8 | 85.9   | 0.3628 | 8.112  | 0.62     |
| 2 | 14.771 | 21132  | 722.9  | 0.437  | 84.122 | 0.491    |
| 3 | 16.853 | 220.1  | 7.1    | 0.4783 | 0.876  | 0.632    |
| 4 | 26.403 | 1730.7 | 34     | 0.7707 | 6.890  | 0.576    |

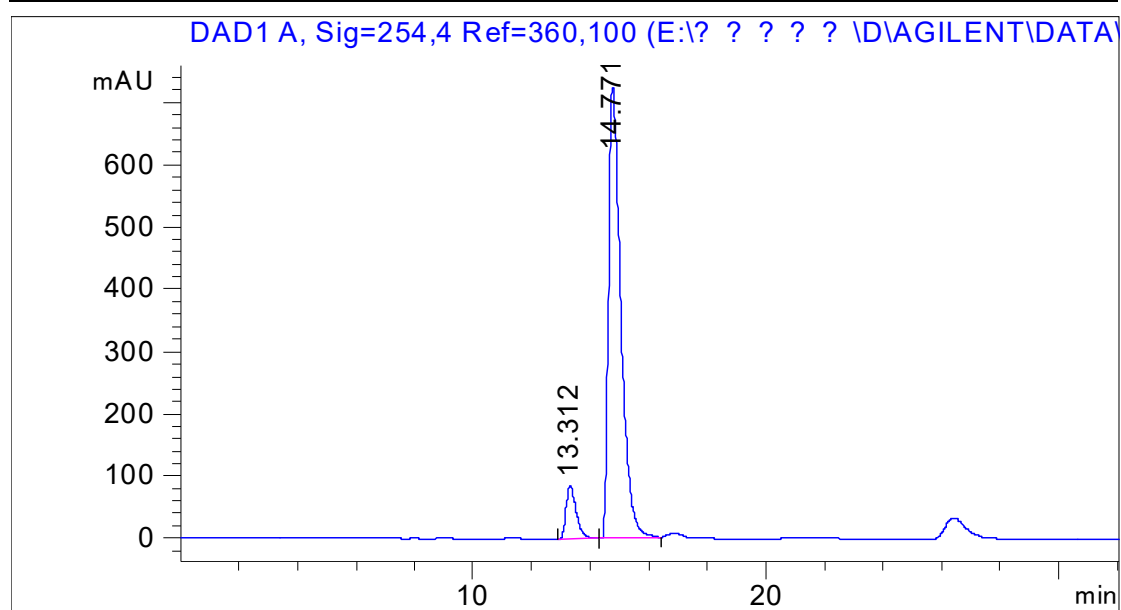

| # | Time   | Area   | Height | Width  | Area%  | Symmetry |
|---|--------|--------|--------|--------|--------|----------|
| 1 | 13.312 | 2037.8 | 85.9   | 0.3628 | 8.795  | 0.62     |
| 2 | 14.771 | 21132  | 722.9  | 0.437  | 91.205 | 0.491    |



3ea-racmic

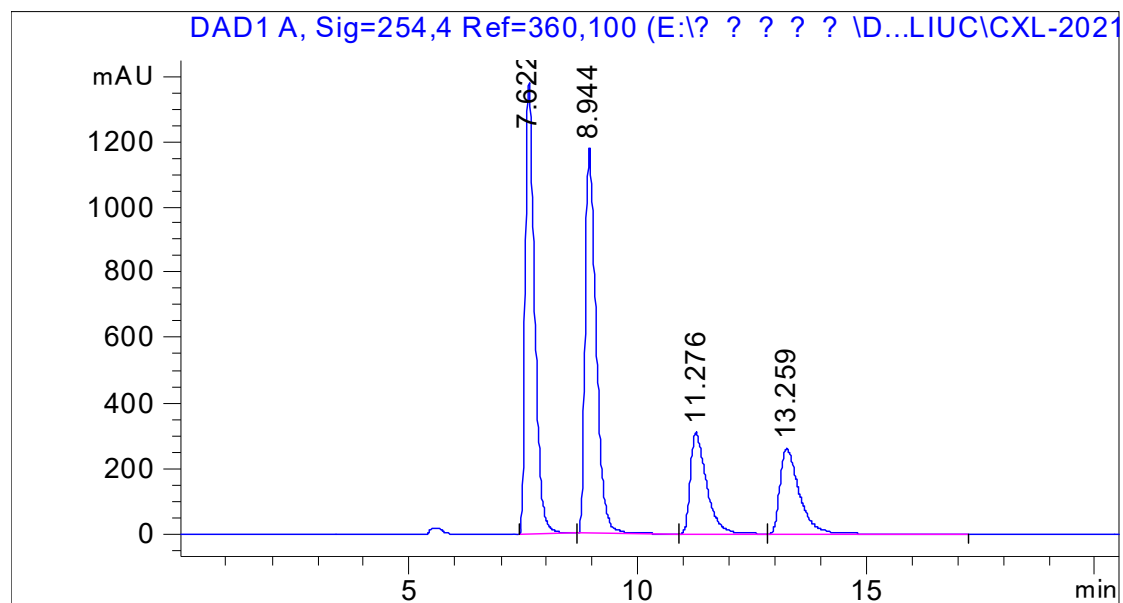

| # | Time   | Area    | Height | Width  | Area%  | Symmetry |
|---|--------|---------|--------|--------|--------|----------|
| 1 | 7.622  | 19601.2 | 1378.9 | 0.2178 | 35.871 | 0.562    |
| 2 | 8.944  | 19660.8 | 1179.3 | 0.2525 | 35.980 | 0.555    |
| 3 | 11.276 | 7666.6  | 309    | 0.3714 | 14.030 | 0.489    |
| 4 | 13.259 | 7715.2  | 261    | 0.4409 | 14.119 | 0.483    |

3ea-chiral

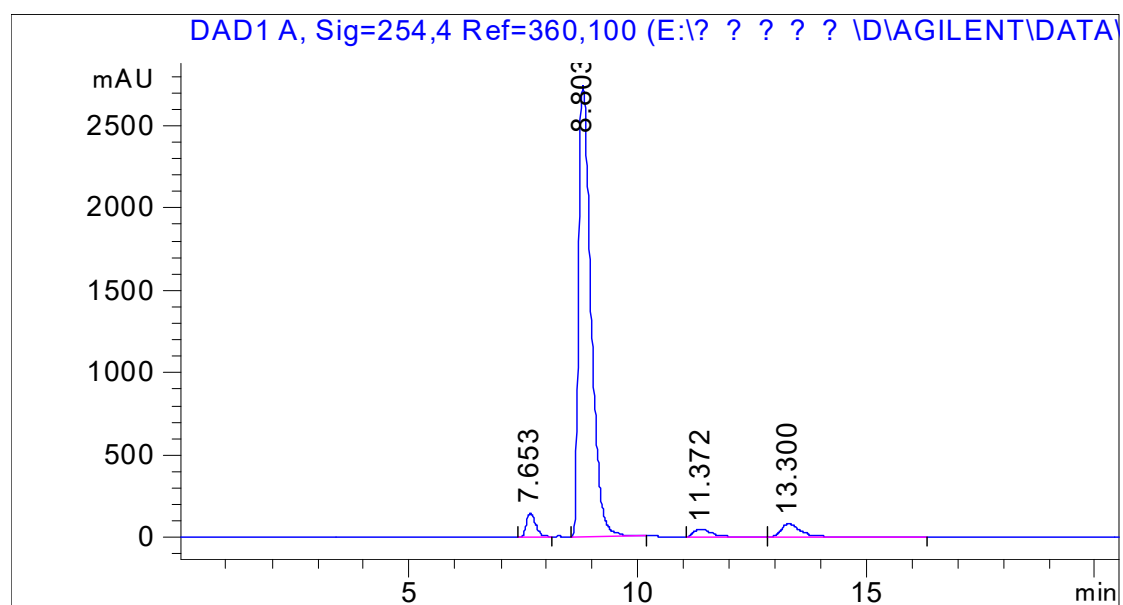



| # | Time   | Area    | Height | Width  | Area%  | Symmetry |
|---|--------|---------|--------|--------|--------|----------|
| 1 | 7.653  | 2048.5  | 150.4  | 0.2109 | 3.581  | 0.654    |
| 2 | 8.803  | 51552.9 | 2741.1 | 0.2834 | 90.108 | 0.466    |
| 3 | 11.372 | 1332.8  | 51     | 0.3968 | 2.330  | 0.529    |
| 4 | 13.3   | 2277.8  | 78.5   | 0.4364 | 3.981  | 0.546    |

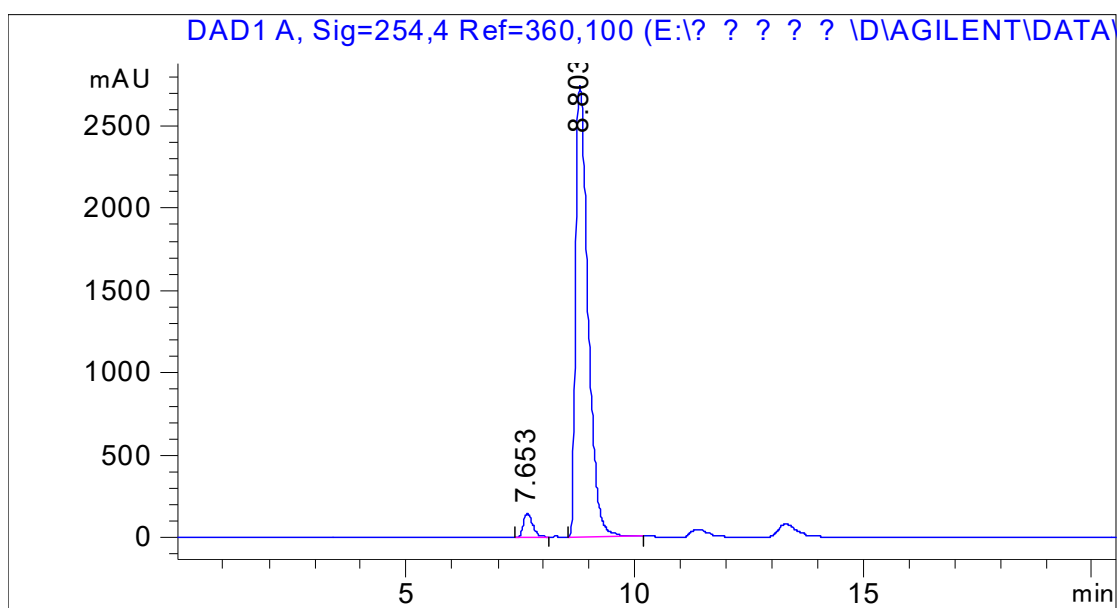

| # | Time  | Area    | Height | Width  | Area%  | Symmetry |
|---|-------|---------|--------|--------|--------|----------|
| 1 | 7.653 | 2048.5  | 150.4  | 0.2109 | 3.822  | 0.654    |
| 2 | 8.803 | 51552.9 | 2741.1 | 0.2834 | 96.178 | 0.466    |



### 3fa-racmic

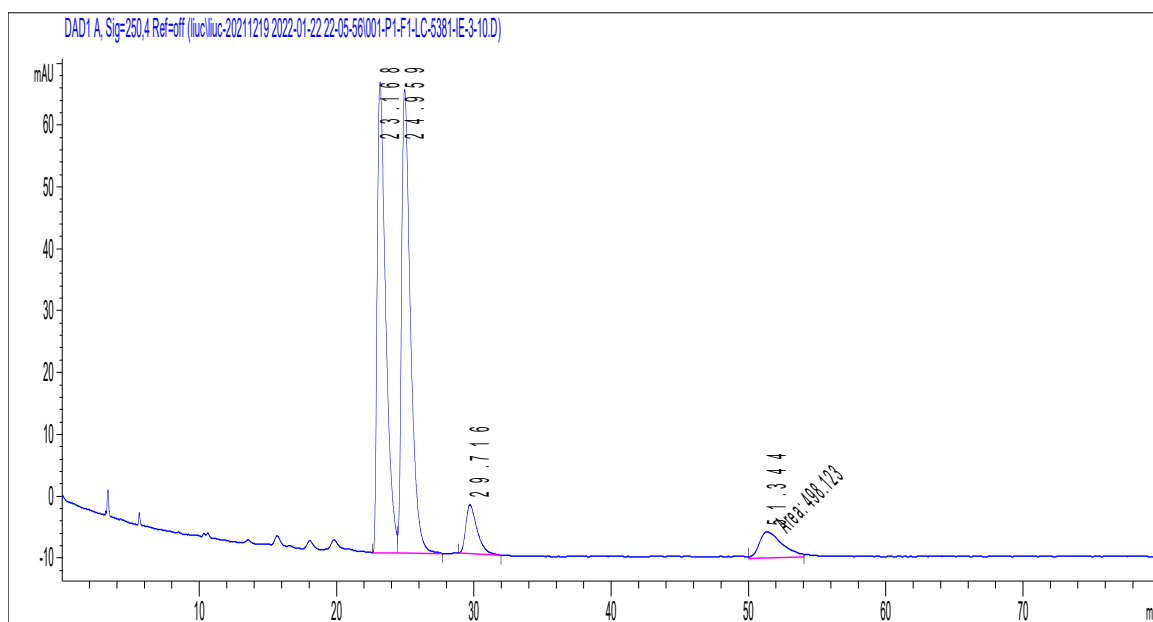

### 3fa-chiral

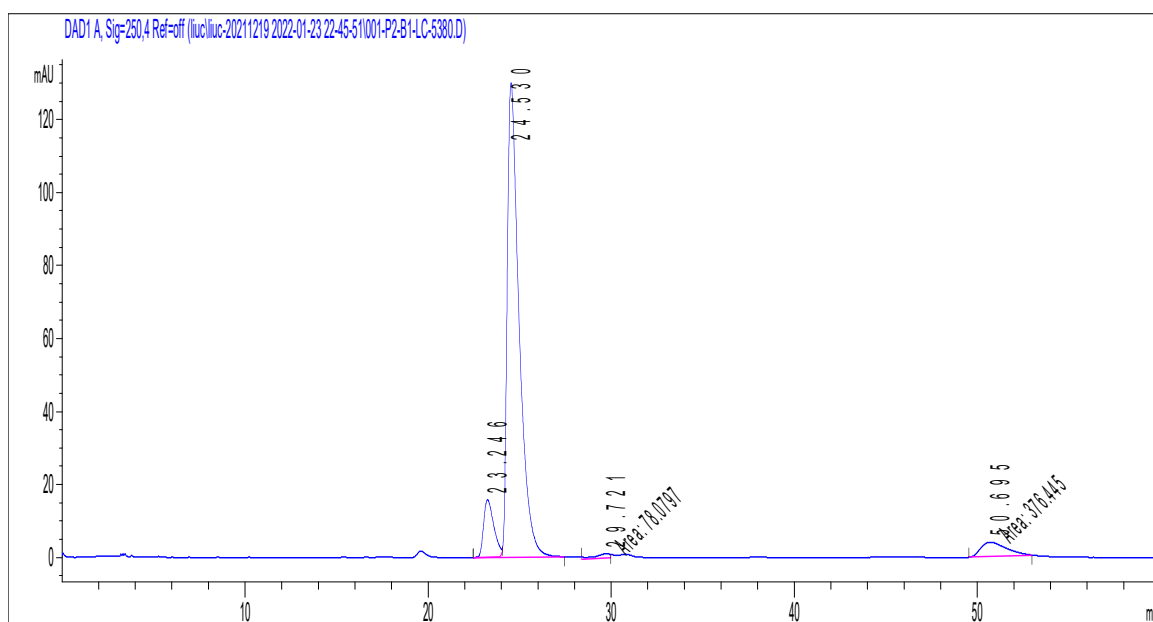



| # | Time   | Area   | Height | Width  | Area%  | Symmetry |
|---|--------|--------|--------|--------|--------|----------|
| 1 | 23.246 | 616.8  | 15.8   | 0.5926 | 8.876  | 0.595    |
| 2 | 24.53  | 5877.8 | 129.9  | 0.6738 | 84.583 | 0.757    |
| 3 | 29.721 | 78.1   | 1.3    | 1.0258 | 1.124  | 3.231    |
| 4 | 50.695 | 376.4  | 3.9    | 1.5992 | 5.417  | 0.547    |

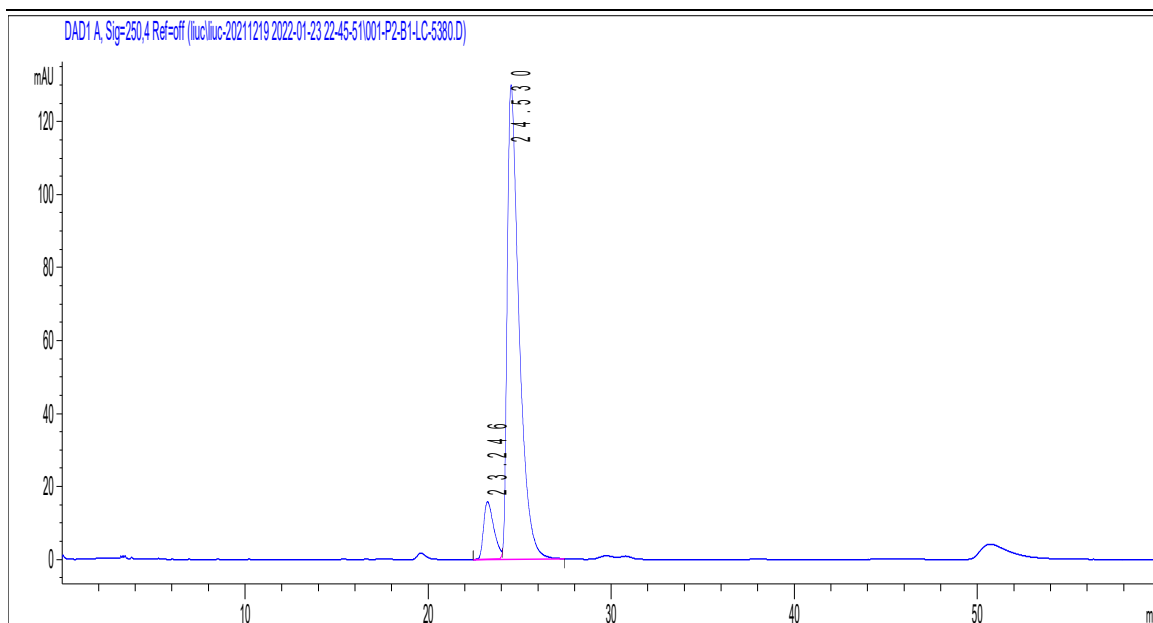

| # | Time   | Area   | Height | Width  | Area%  | Symmetry |
|---|--------|--------|--------|--------|--------|----------|
| 1 | 23.246 | 616.8  | 15.8   | 0.5926 | 9.497  | 0.595    |
| 2 | 24.53  | 5877.8 | 129.9  | 0.6738 | 90.503 | 0.757    |



3ga-racmic

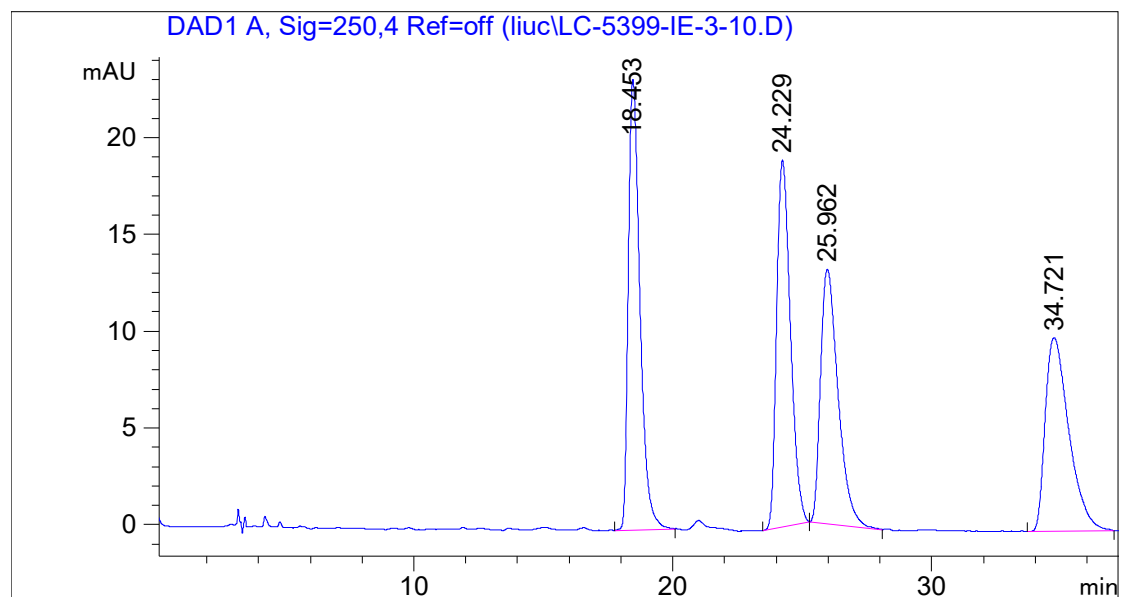

| # | Time   | Area  | Height | Width  | Area%  | Symmetry |
|---|--------|-------|--------|--------|--------|----------|
| 1 | 18.453 | 726.3 | 23.3   | 0.4758 | 27.060 | 0.595    |
| 2 | 24.229 | 701   | 19     | 0.5751 | 26.116 | 0.679    |
| 3 | 25.962 | 620.5 | 13.2   | 0.7098 | 23.115 | 0.59     |
| 4 | 34.721 | 636.4 | 10     | 0.9166 | 23.708 | 0.56     |

3ga-chiral

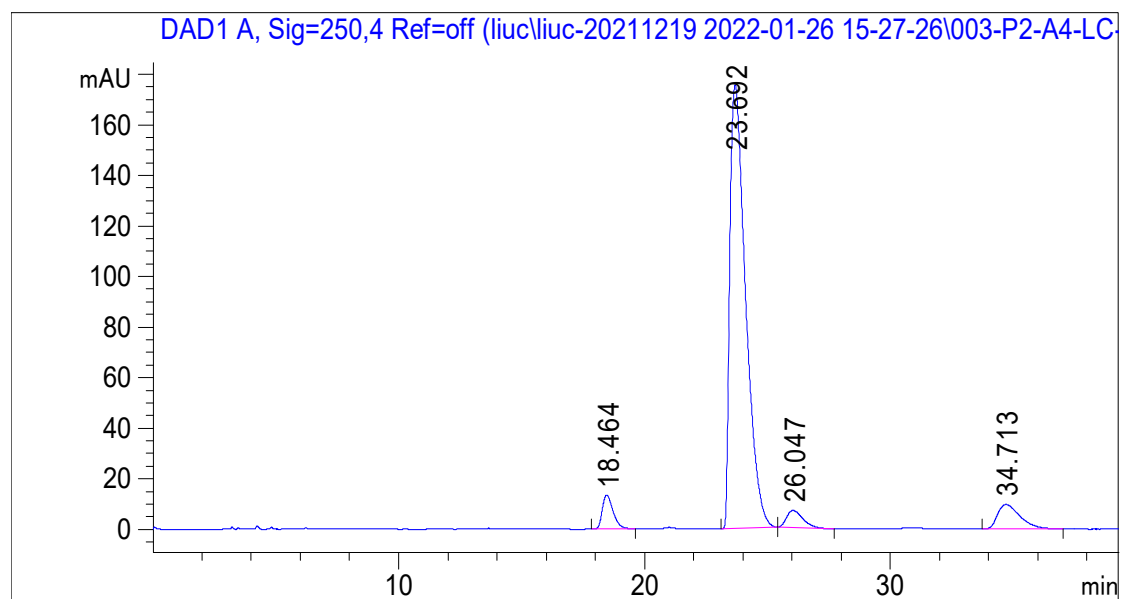



| # | Time   | Area   | Height | Width  | Area%  | Symmetry |
|---|--------|--------|--------|--------|--------|----------|
| 1 | 18.464 | 412.2  | 13.5   | 0.4673 | 4.498  | 0.638    |
| 2 | 23.692 | 7814.9 | 175.6  | 0.6753 | 85.290 | 0.463    |
| 3 | 26.047 | 315.4  | 6.8    | 0.6853 | 3.442  | 0.619    |
| 4 | 34.713 | 620.3  | 9.7    | 0.9221 | 6.770  | 0.565    |

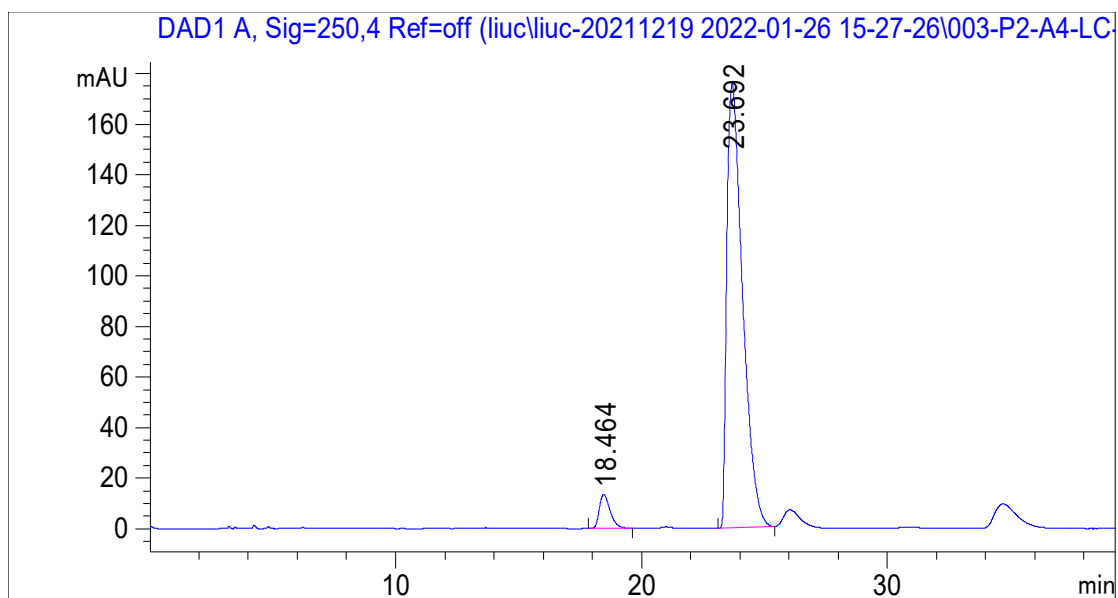

| # | Time   | Area   | Height | Width  | Area%  | Symmetry |
|---|--------|--------|--------|--------|--------|----------|
| 1 | 18.464 | 412.2  | 13.5   | 0.4673 | 5.010  | 0.638    |
| 2 | 23.692 | 7814.9 | 175.6  | 0.6753 | 94.990 | 0.463    |



3ha-racmic

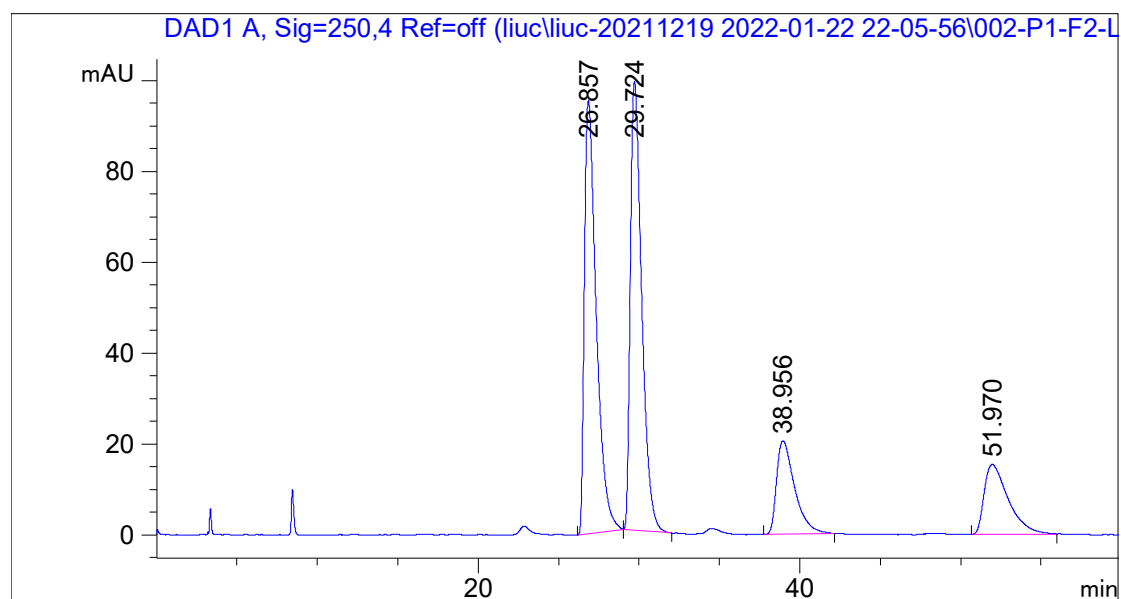

| # | Time   | Area   | Height | Width  | Area%  | Symmetry |
|---|--------|--------|--------|--------|--------|----------|
| 1 | 26.857 | 4844.6 | 95.1   | 0.764  | 37.608 | 0.461    |
| 2 | 29.724 | 4831.9 | 98.7   | 0.7431 | 37.509 | 0.534    |
| 3 | 38.956 | 1604.8 | 20.6   | 1.1263 | 12.457 | 0.512    |
| 4 | 51.97  | 1600.8 | 15.4   | 1.3908 | 12.426 | 0.471    |

3ha-chiral

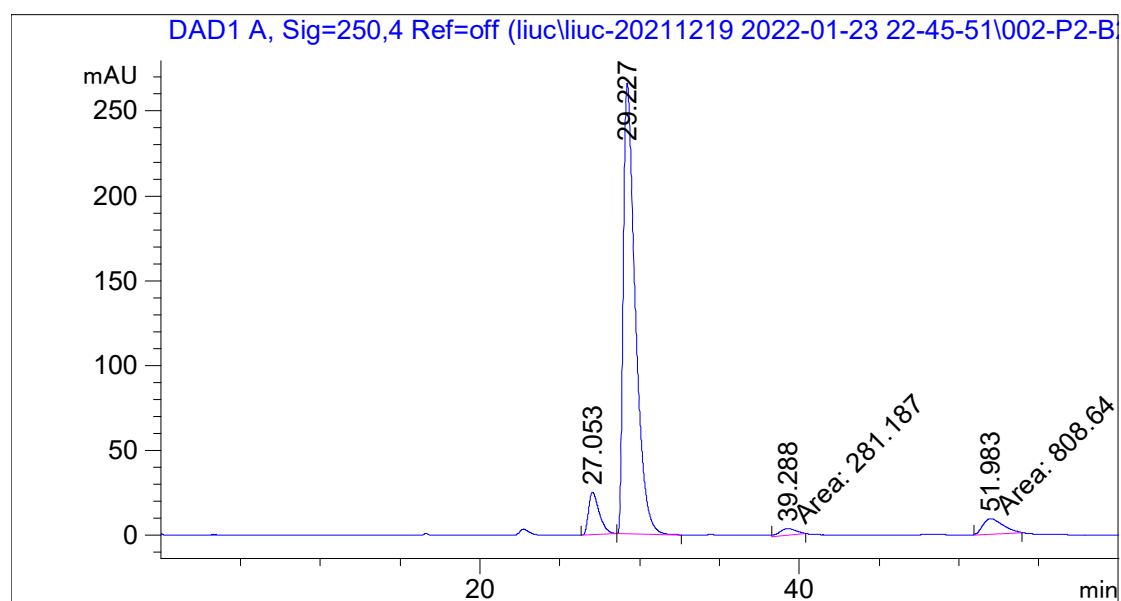



| # | Time   | Area    | Height | Width  | Area%  | Symmetry |
|---|--------|---------|--------|--------|--------|----------|
| 1 | 27.053 | 1167.4  | 25.1   | 0.6942 | 7.248  | 0.553    |
| 2 | 29.227 | 13849.4 | 265.7  | 0.7781 | 85.986 | 0.445    |
| 3 | 39.288 | 281.2   | 3.9    | 0.8494 | 1.746  | 1.034    |
| 4 | 51.983 | 808.6   | 9.1    | 1.4758 | 5.021  | 0.604    |

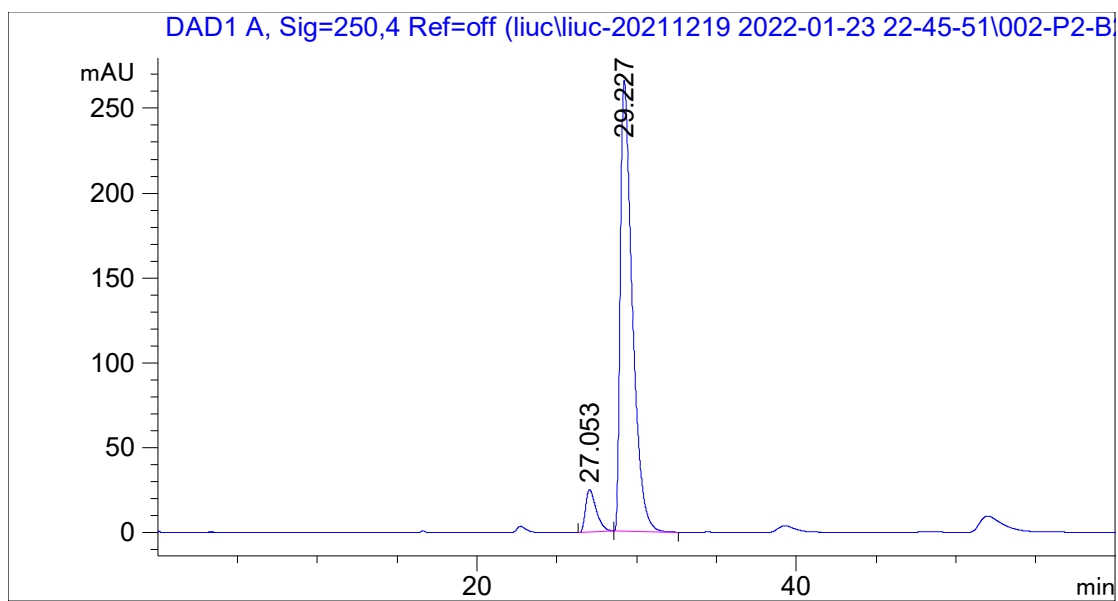

| # | Time   | Area    | Height | Width  | Area%  | Symmetry |
|---|--------|---------|--------|--------|--------|----------|
| 1 | 27.053 | 1167.4  | 25.1   | 0.6942 | 7.774  | 0.553    |
| 2 | 29.227 | 13849.4 | 265.7  | 0.7781 | 92.226 | 0.445    |



3ia-racmic

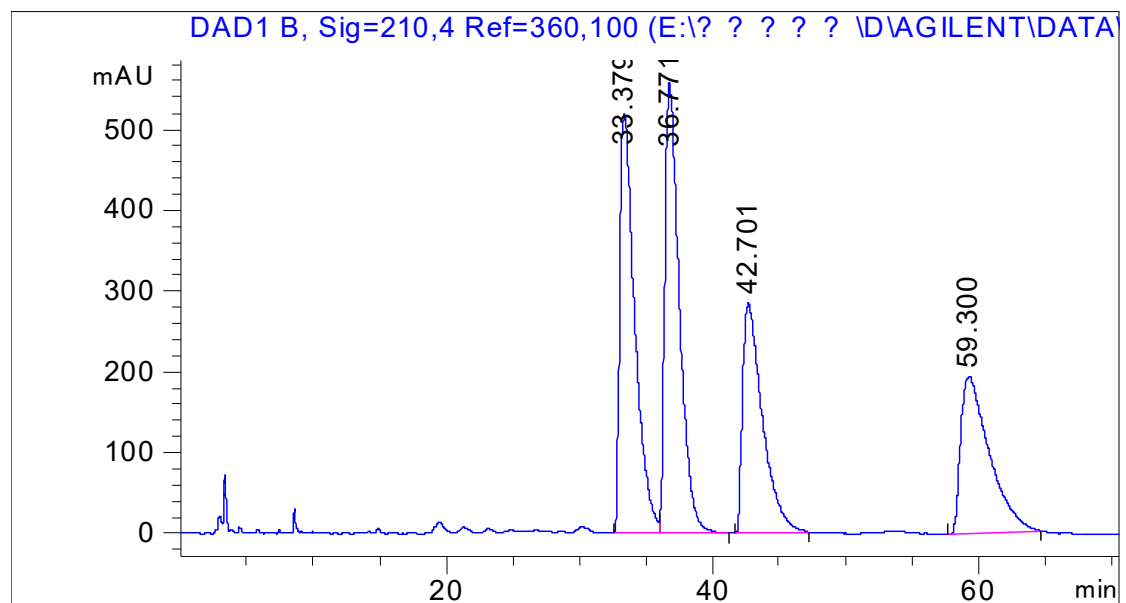

| # | Time   | Area    | Height | Width  | Area%  | Symmetry |
|---|--------|---------|--------|--------|--------|----------|
| 1 | 33.378 | 15491   | 196.4  | 1.1562 | 29.304 | 0.407    |
| 2 | 36.77  | 16021.3 | 211.4  | 1.1322 | 30.307 | 0.438    |
| 3 | 42.702 | 10638.6 | 102.5  | 1.4944 | 20.125 | 0.373    |
| 4 | 59.300 | 10712.3 | 70.2   | 2.1457 | 20.264 | 0.371    |

3ia-chiral

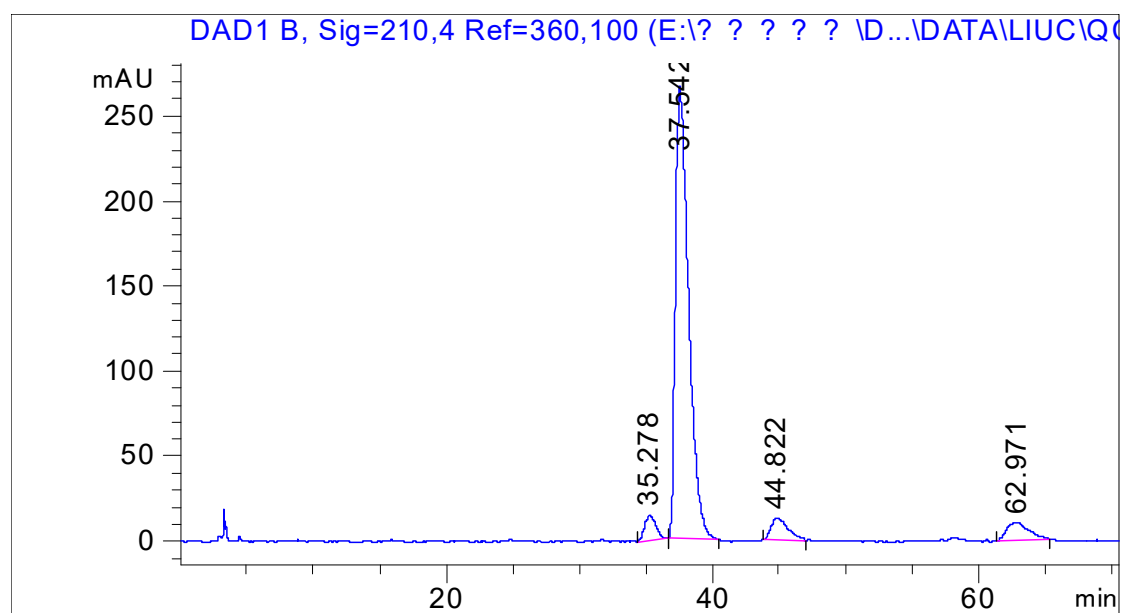



| # | Time   | Area   | Height | Width  | Area%  | Symmetry |
|---|--------|--------|--------|--------|--------|----------|
| 1 | 35.278 | 330.9  | 5.5    | 0.8741 | 3.953  | 0.716    |
| 2 | 37.542 | 6916.1 | 100.1  | 1.0321 | 82.620 | 0.462    |
| 3 | 44.822 | 491.8  | 5.1    | 1.5962 | 5.875  | 0.585    |
| 4 | 62.971 | 632.2  | 4.8    | 1.5591 | 7.552  | 0.637    |

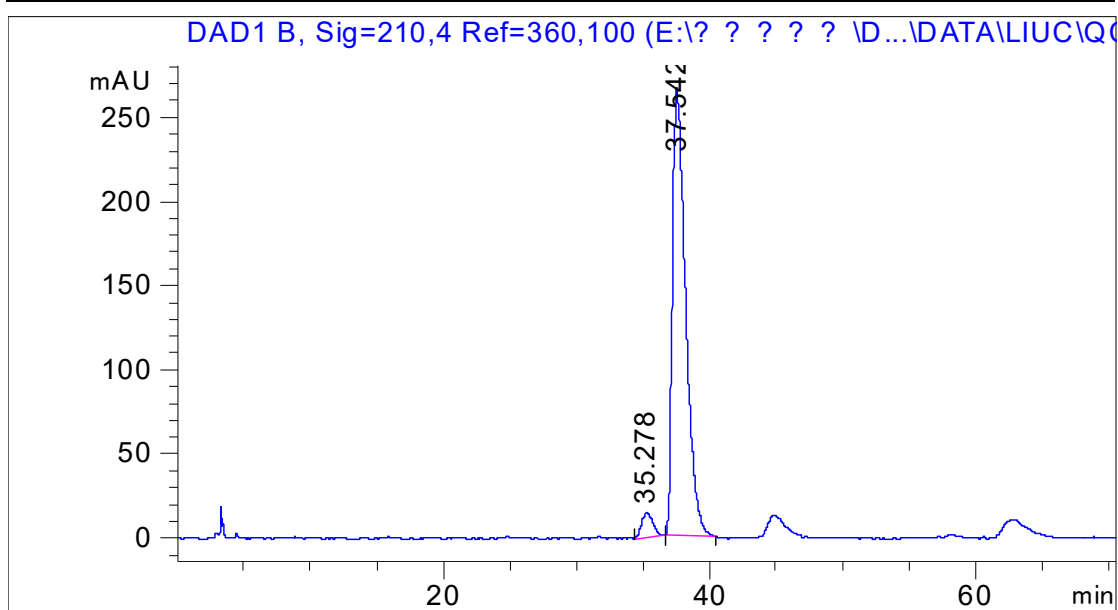

| # | Time   | Area   | Height | Width  | Area%  | Symmetry |
|---|--------|--------|--------|--------|--------|----------|
| 1 | 35.278 | 330.9  | 5.5    | 0.8741 | 4.566  | 0.716    |
| 2 | 37.542 | 6916.1 | 100.1  | 1.0321 | 95.434 | 0.462    |



3ja-racmic

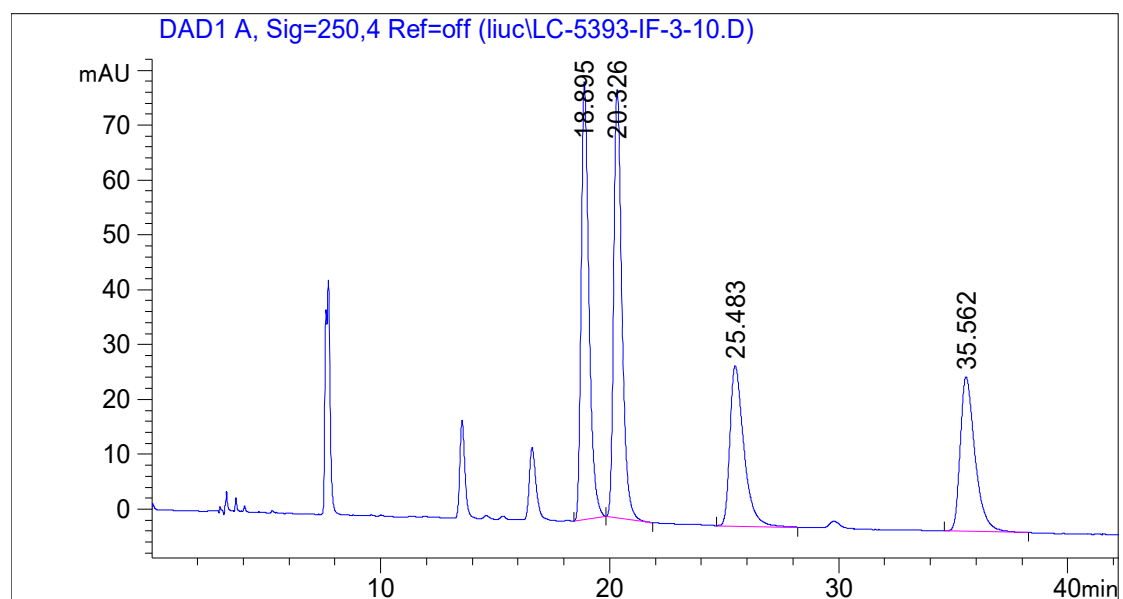

| # | Time   | Area   | Height | Width  | Area%  | Symmetry |
|---|--------|--------|--------|--------|--------|----------|
| 1 | 18.895 | 1883.9 | 79.8   | 0.3573 | 29.821 | 0.644    |
| 2 | 20.326 | 1933.8 | 78.1   | 0.377  | 30.612 | 0.663    |
| 3 | 25.483 | 1234   | 29.2   | 0.6334 | 19.533 | 0.568    |
| 4 | 35.562 | 1265.7 | 28.2   | 0.6782 | 20.035 | 0.602    |

3ja-chiral

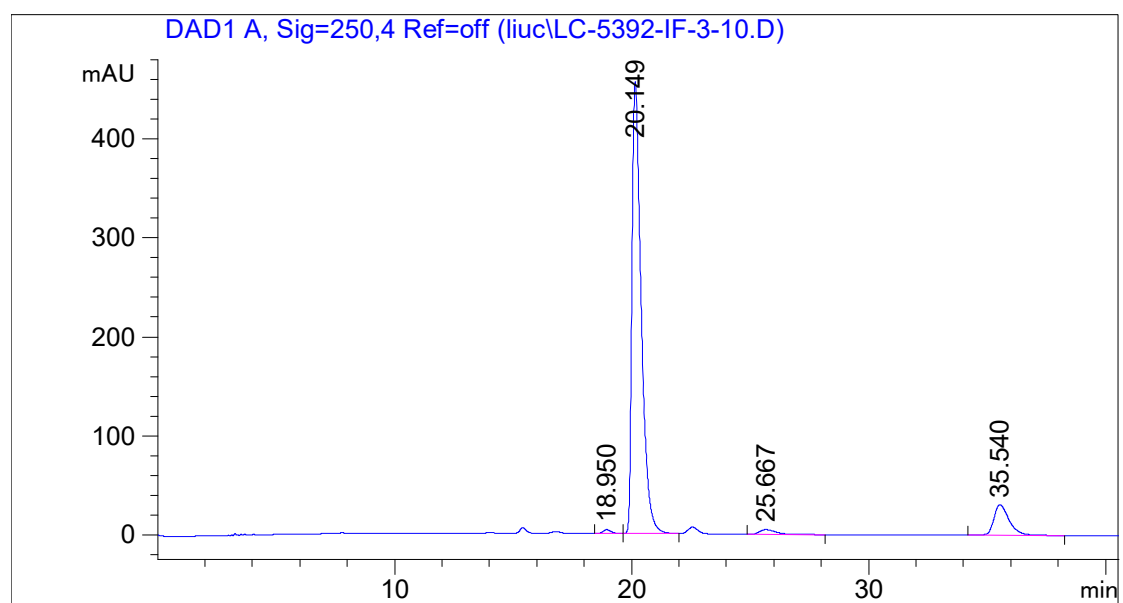



| # | Time   | Area    | Height | Width  | Area%  | Symmetry |
|---|--------|---------|--------|--------|--------|----------|
| 1 | 18.95  | 96.2    | 4      | 0.3613 | 0.688  | 0.755    |
| 2 | 20.149 | 12257.8 | 455.6  | 0.4059 | 87.667 | 0.479    |
| 3 | 25.667 | 246.7   | 4.8    | 0.7106 | 1.764  | 0.534    |
| 4 | 35.54  | 1381.6  | 30.9   | 0.6699 | 9.881  | 0.636    |

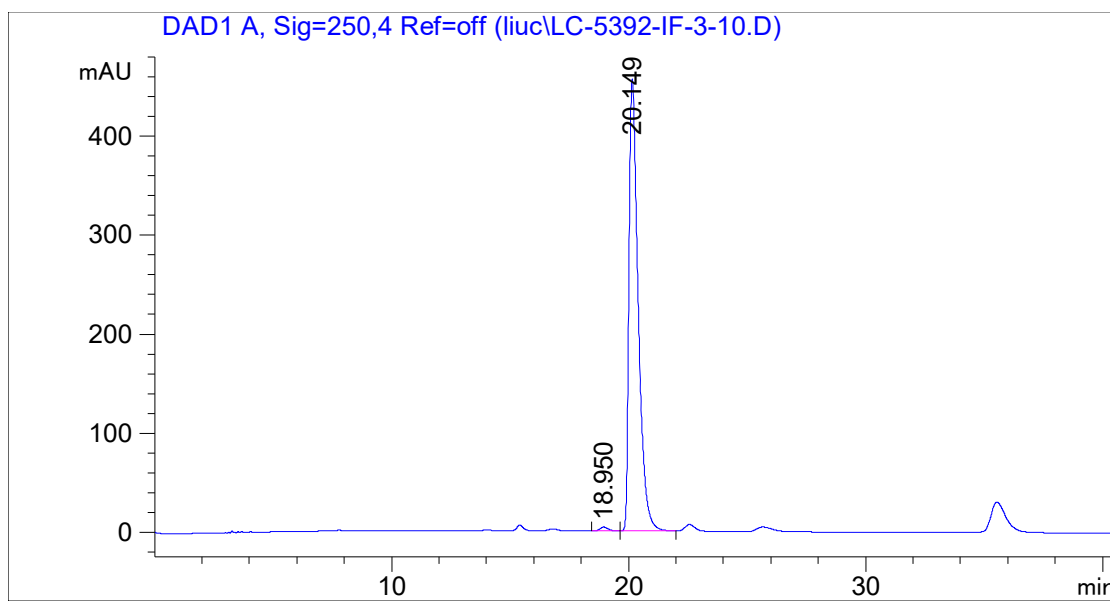

| # | Time   | Area    | Height | Width  | Area%  | Symmetry |
|---|--------|---------|--------|--------|--------|----------|
| 1 | 18.95  | 96.2    | 4      | 0.3613 | 0.779  | 0.755    |
| 2 | 20.149 | 12257.8 | 455.6  | 0.4059 | 99.221 | 0.479    |



3ka-racmic

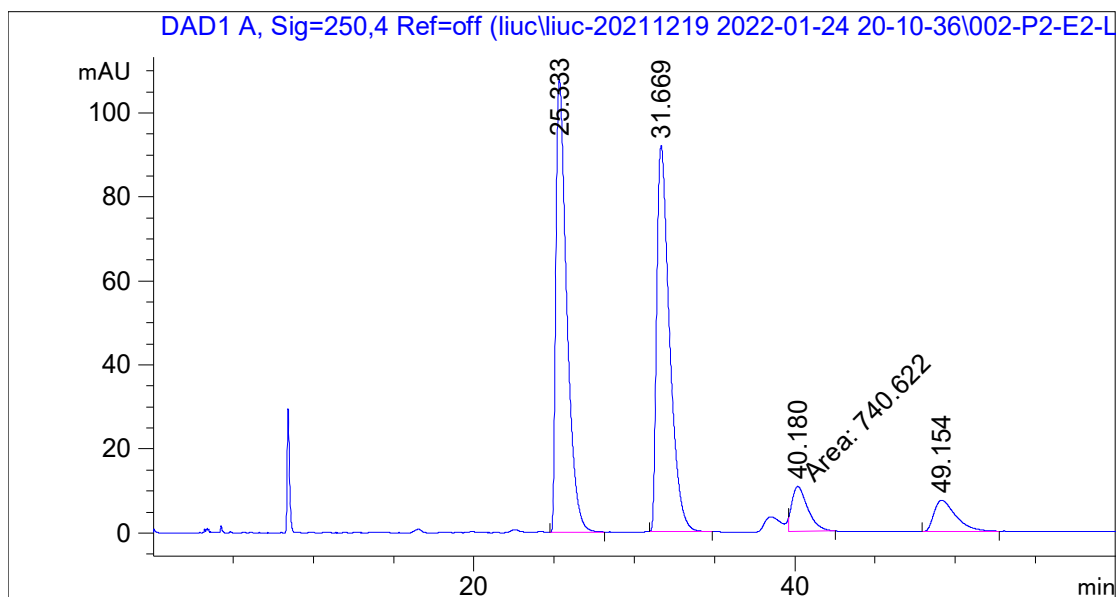

| # | Time   | Area   | Height | Width  | Area%  | Symmetry |
|---|--------|--------|--------|--------|--------|----------|
| 1 | 25.333 | 5114.7 | 107.9  | 0.7073 | 43.761 | 0.442    |
| 2 | 31.669 | 5130.8 | 92     | 0.8366 | 43.898 | 0.474    |
| 3 | 40.18  | 740.6  | 10.8   | 1.1458 | 6.337  | 0.542    |
| 4 | 49.154 | 701.8  | 7.5    | 1.1129 | 6.005  | 0.515    |

3ka-chiral

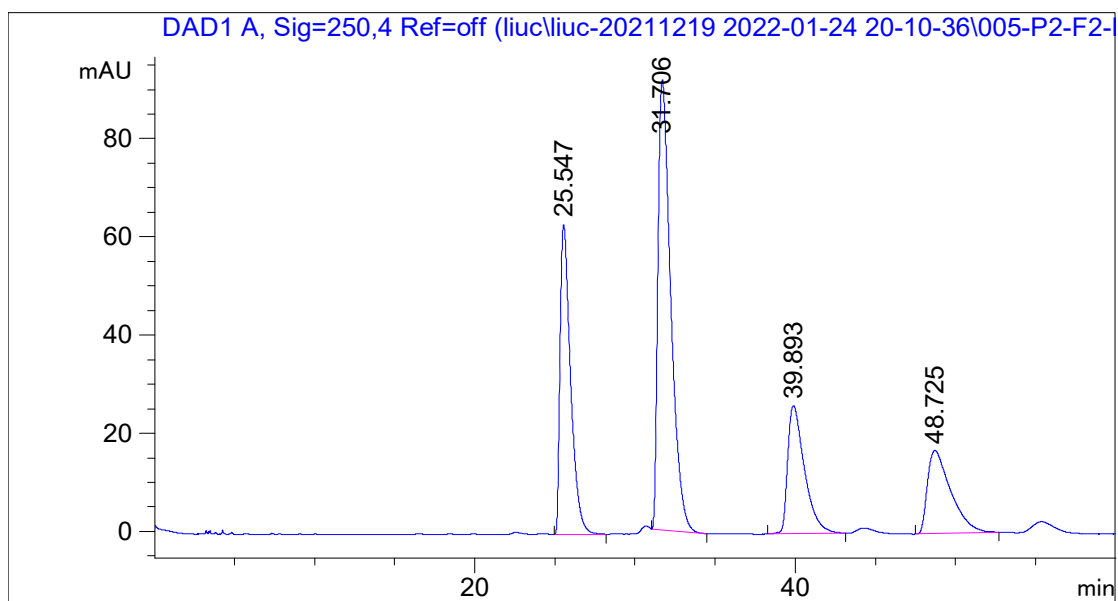



| # | Time   | Area   | Height | Width  | Area%  | Symmetry |
|---|--------|--------|--------|--------|--------|----------|
| 1 | 25.547 | 2867.2 | 63.1   | 0.6821 | 24.731 | 0.469    |
| 2 | 31.706 | 5103.6 | 91.8   | 0.8368 | 44.021 | 0.473    |
| 3 | 39.893 | 1914.9 | 26.1   | 1.0774 | 16.517 | 0.487    |
| 4 | 48.725 | 1707.8 | 17     | 1.3733 | 14.731 | 0.436    |

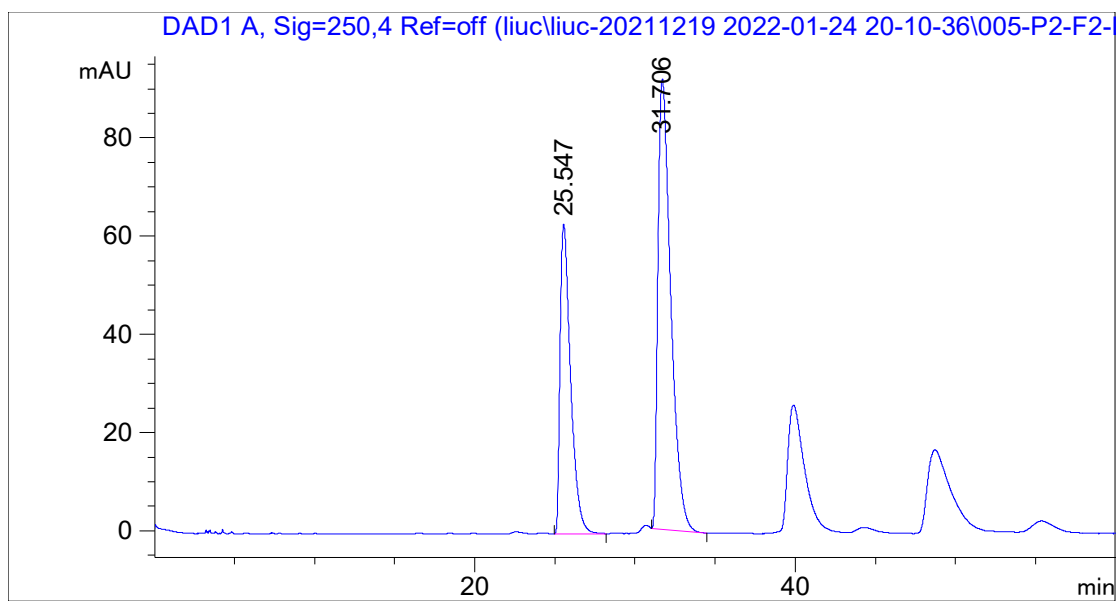

| # | Time   | Area   | Height | Width  | Area%  | Symmetry |
|---|--------|--------|--------|--------|--------|----------|
| 1 | 25.547 | 2867.2 | 63.1   | 0.6821 | 35.971 | 0.469    |
| 2 | 31.706 | 5103.6 | 91.8   | 0.8368 | 64.029 | 0.473    |



3la-racmic

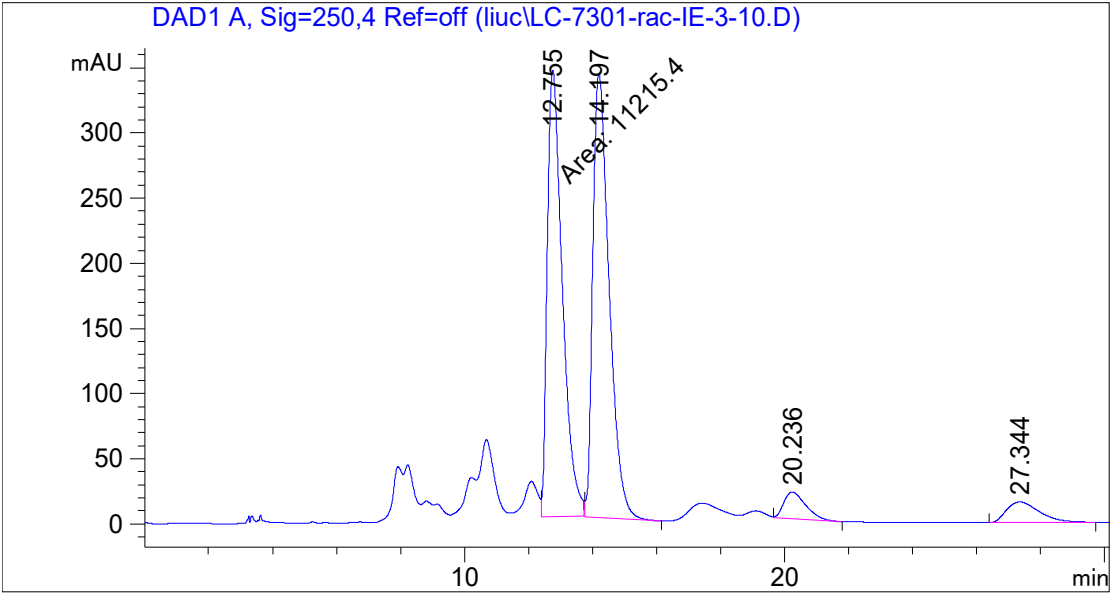

| # | Time   | Area    | Height | Width  | Area%  | Symmetry |
|---|--------|---------|--------|--------|--------|----------|
| 1 | 12.755 | 11215.4 | 342.6  | 0.5456 | 44.173 | 0.54     |
| 2 | 14.197 | 12081.4 | 340.7  | 0.5477 | 47.584 | 0.552    |
| 3 | 20.236 | 979.5   | 20.5   | 0.6978 | 3.858  | 0.584    |
| 4 | 27.344 | 1113.2  | 15.8   | 0.9752 | 4.385  | 0.622    |

3la-chiral

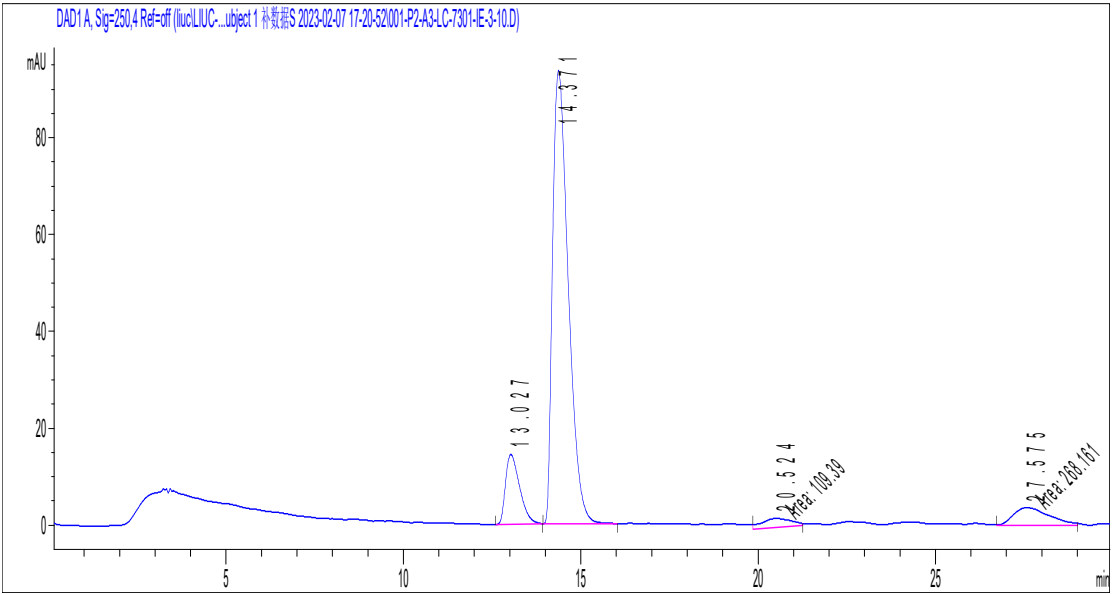



| # | Time   | Area   | Height | Width  | Area%  | Symmetry |
|---|--------|--------|--------|--------|--------|----------|
| 1 | 13.027 | 399.1  | 14.4   | 0.4249 | 10.930 | 0.578    |
| 2 | 14.371 | 2874.4 | 93.7   | 0.4781 | 78.729 | 0.568    |
| 3 | 20.524 | 109.4  | 1.9    | 0.9766 | 2.996  | 1.05     |
| 4 | 27.575 | 268.2  | 3.7    | 1.1943 | 7.345  | 0.587    |

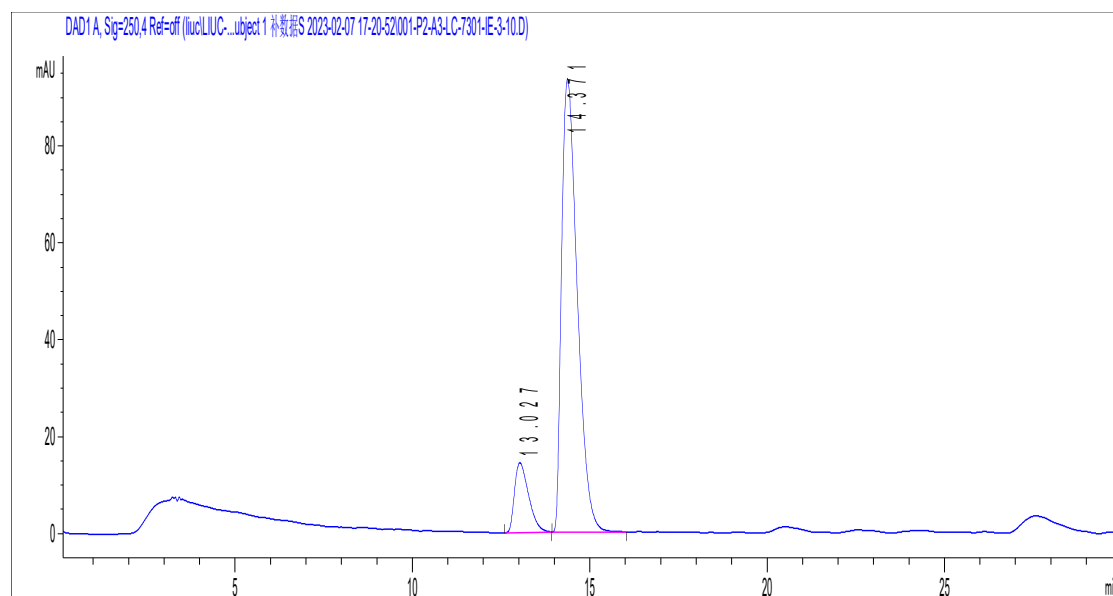

| # | Time   | Area   | Height | Width  | Area%  | Symmetry |
|---|--------|--------|--------|--------|--------|----------|
| 1 | 13.027 | 399.1  | 14.4   | 0.4249 | 12.191 | 0.578    |
| 2 | 14.371 | 2874.4 | 93.7   | 0.4781 | 87.809 | 0.568    |



3ma-racmic

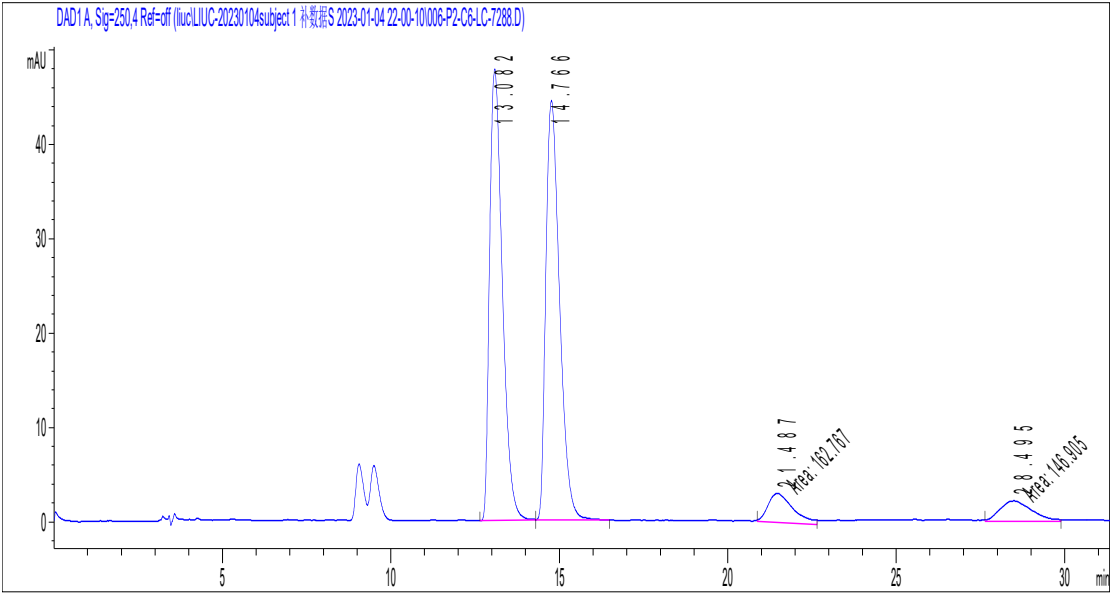

| # | Time   | Area   | Height | Width  | Area%  | Symmetry |
|---|--------|--------|--------|--------|--------|----------|
| 1 | 13.082 | 1256.1 | 47.8   | 0.4104 | 44.452 | 0.618    |
| 2 | 14.766 | 1259.9 | 44.4   | 0.441  | 44.589 | 0.633    |
| 3 | 21.487 | 162.8  | 3.1    | 0.8706 | 5.760  | 0.596    |
| 4 | 28.495 | 146.9  | 2.2    | 1.114  | 5.199  | 0.754    |

3ma-chiral

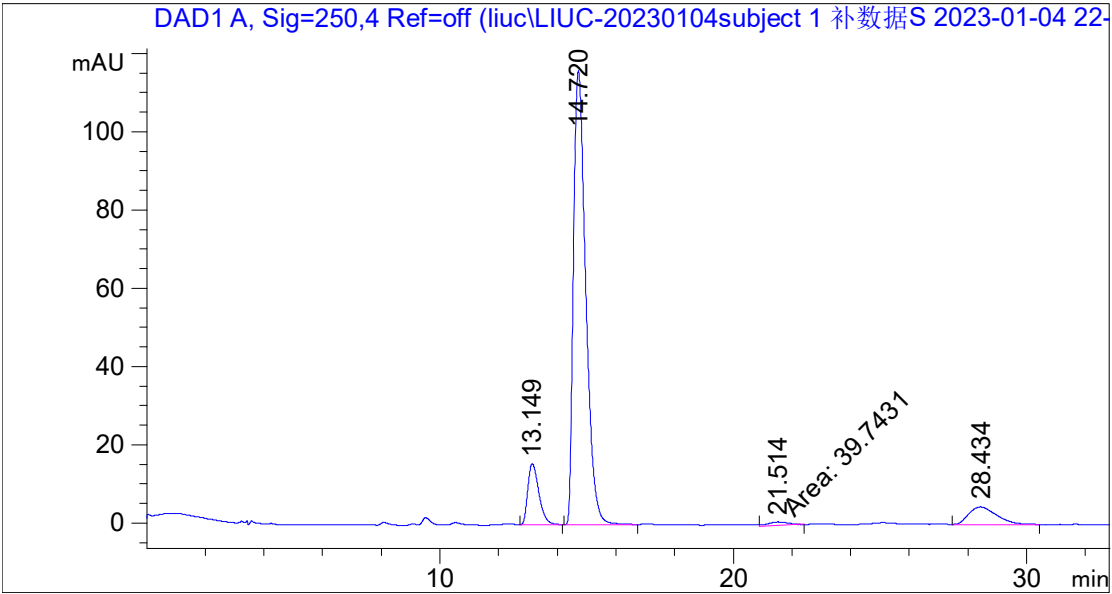



| # | Time   | Area   | Height | Width  | Area%  | Symmetry |
|---|--------|--------|--------|--------|--------|----------|
| 1 | 13.149 | 407.9  | 15.6   | 0.404  | 9.913  | 0.64     |
| 2 | 14.72  | 3371.8 | 115.9  | 0.4554 | 81.943 | 0.613    |
| 3 | 21.514 | 39.7   | 8.5E-1 | 0.7762 | 0.966  | 0.997    |
| 4 | 28.434 | 295.4  | 4.5    | 0.7808 | 7.179  | 0.719    |

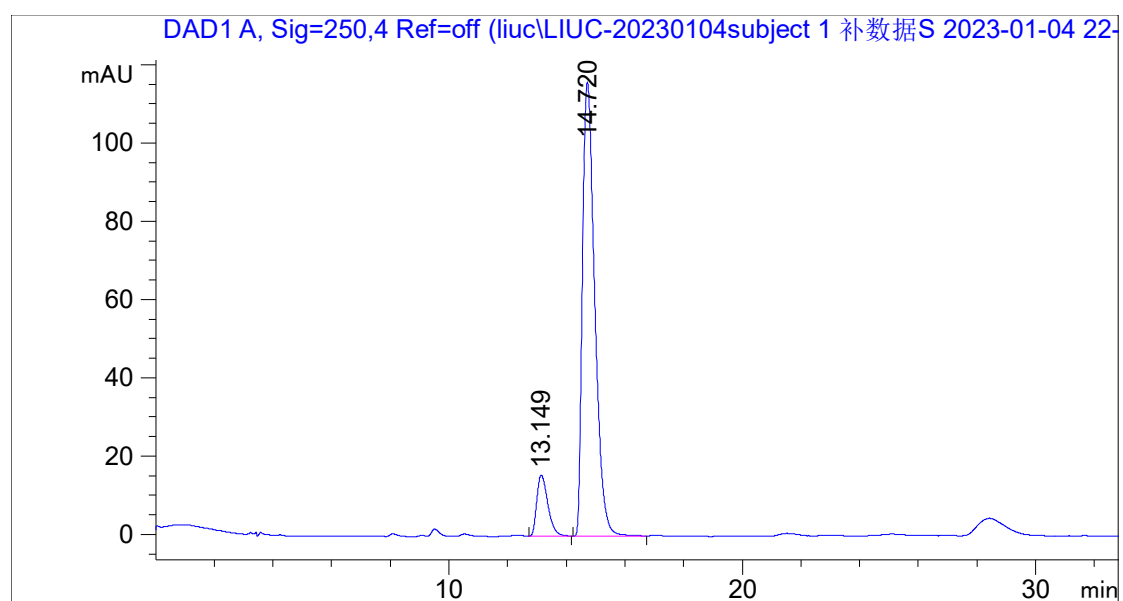

| # | Time   | Area   | Height | Width  | Area%  | Symmetry |
|---|--------|--------|--------|--------|--------|----------|
| 1 | 13.149 | 407.9  | 15.6   | 0.404  | 10.792 | 0.64     |
| 2 | 14.72  | 3371.8 | 115.9  | 0.4554 | 89.208 | 0.613    |



3na-racmic

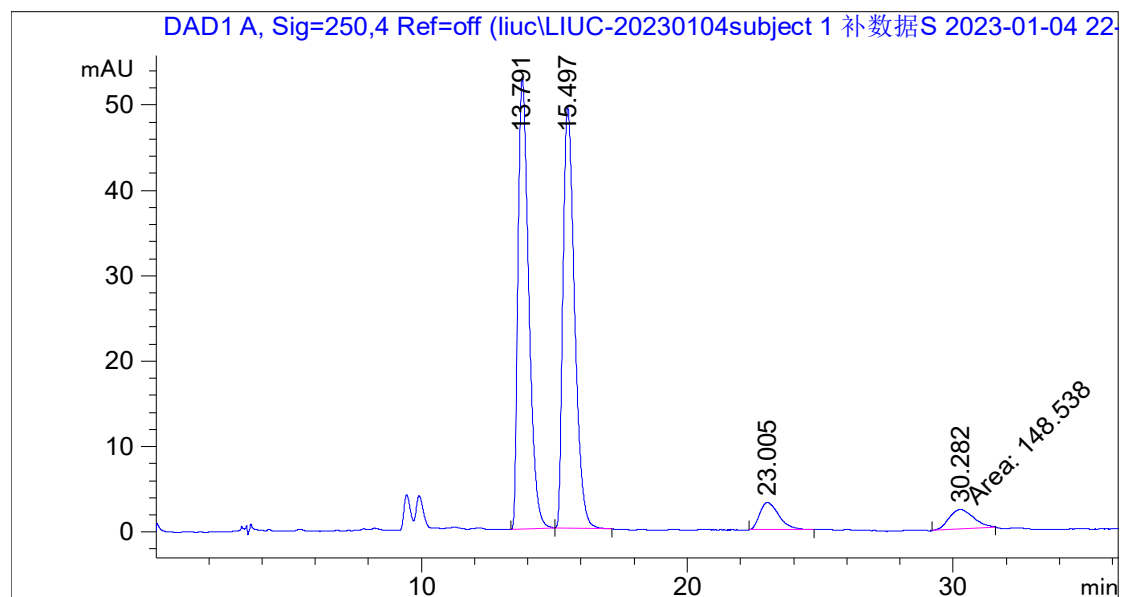

| # | Time   | Area   | Height | Width  | Area%  | Symmetry |
|---|--------|--------|--------|--------|--------|----------|
| 1 | 13.791 | 1485.9 | 52.8   | 0.438  | 45.276 | 0.616    |
| 2 | 15.497 | 1486.9 | 49.3   | 0.4701 | 45.307 | 0.627    |
| 3 | 23.005 | 160.5  | 3.2    | 0.6057 | 4.891  | 0.619    |
| 4 | 30.282 | 148.5  | 2.3    | 1.0743 | 4.526  | 0.863    |

3na-chiral

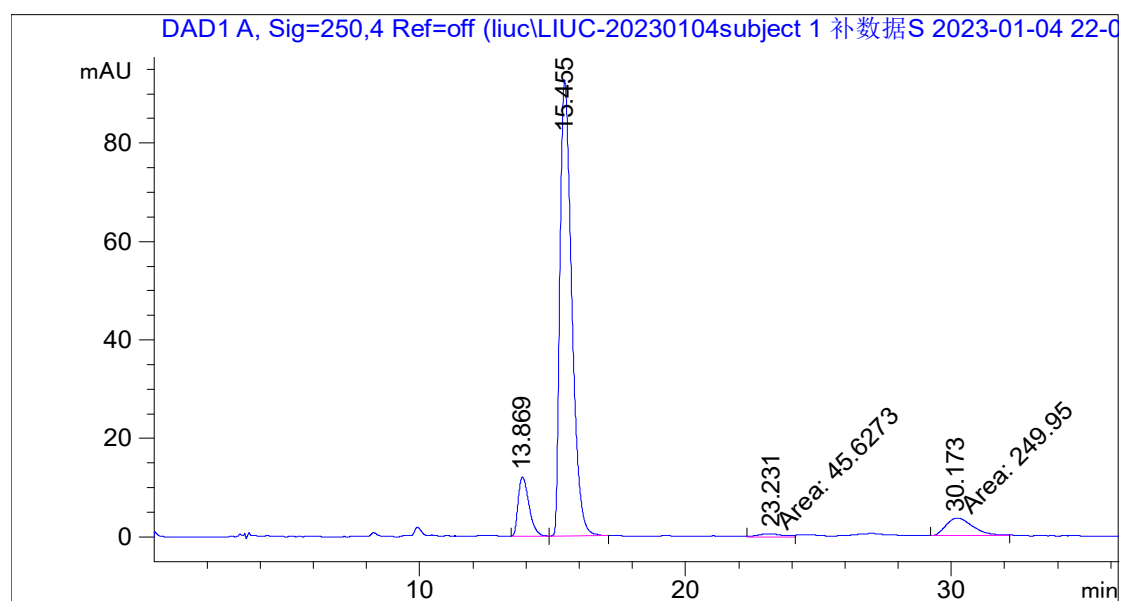



| # | Time   | Area   | Height | Width  | Area%  | Symmetry |
|---|--------|--------|--------|--------|--------|----------|
| 1 | 13.869 | 338.3  | 12     | 0.434  | 9.742  | 0.633    |
| 2 | 15.455 | 2839.1 | 92.6   | 0.4775 | 81.747 | 0.613    |
| 3 | 23.231 | 45.6   | 6.8E-1 | 1.1136 | 1.314  | 1.119    |
| 4 | 30.173 | 249.9  | 3.5    | 1.1759 | 7.197  | 0.572    |

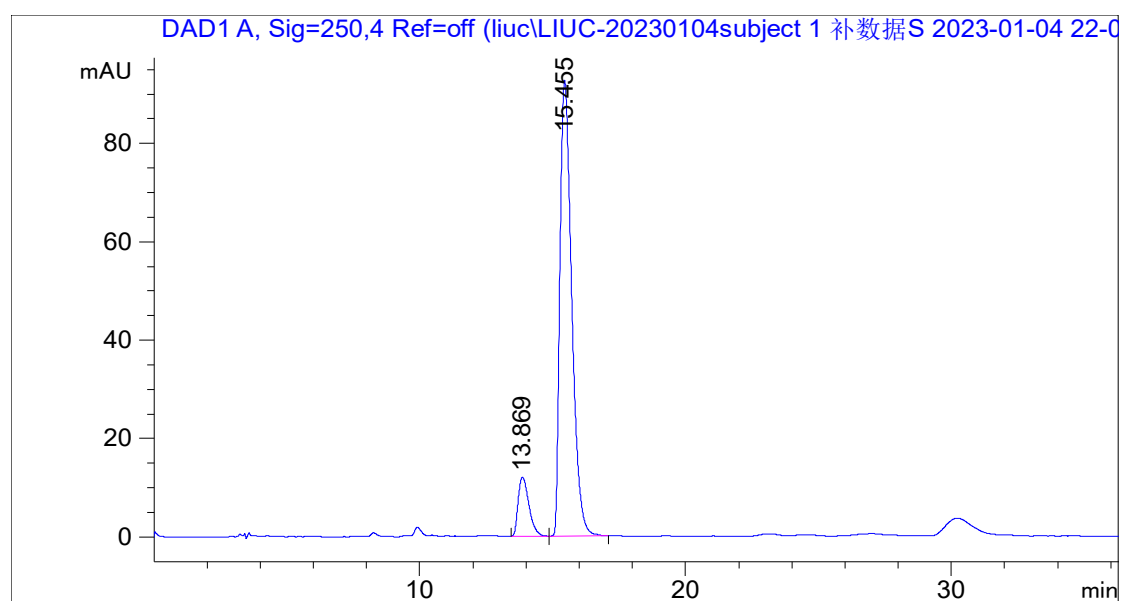

| # | Time   | Area   | Height | Width  | Area%  | Symmetry |
|---|--------|--------|--------|--------|--------|----------|
| 1 | 13.869 | 338.3  | 12     | 0.434  | 10.648 | 0.633    |
| 2 | 15.455 | 2839.1 | 92.6   | 0.4775 | 89.352 | 0.613    |



### 3oa-racmic

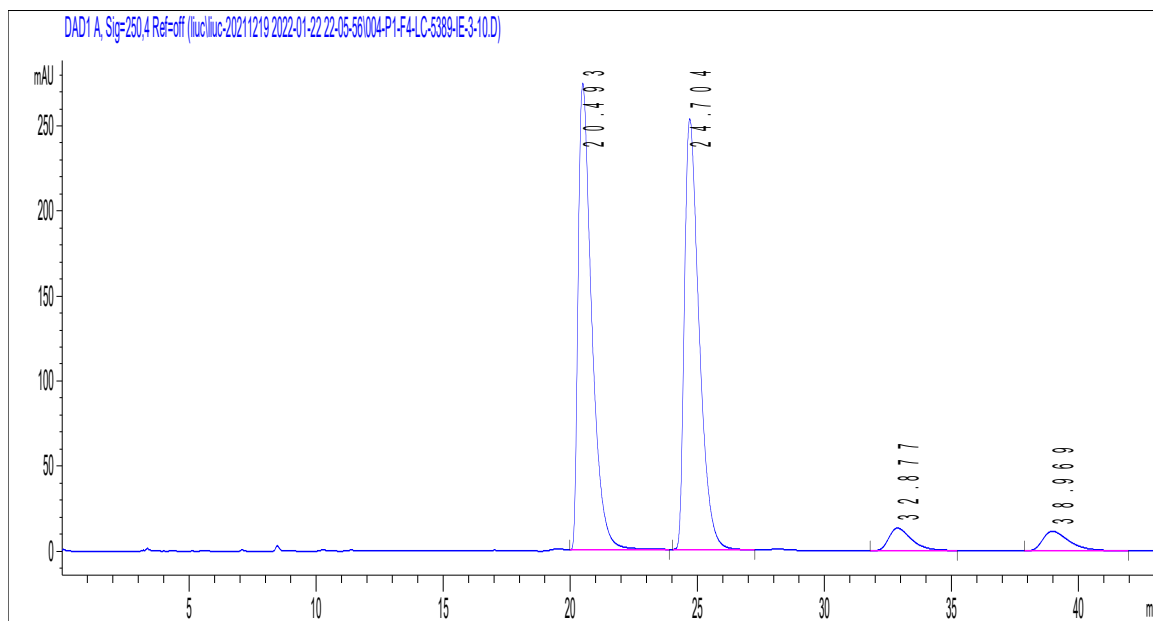

| # | Time   | Area    | Height | Width  | Area%  | Symmetry |
|---|--------|---------|--------|--------|--------|----------|
| 1 | 20.493 | 10202.2 | 274.4  | 0.5577 | 46.353 | 0.472    |
| 2 | 24.704 | 10155.8 | 253.1  | 0.6122 | 46.143 | 0.53     |
| 3 | 32.877 | 821     | 13.3   | 0.8965 | 3.730  | 0.576    |
| 4 | 38.969 | 830.6   | 11.5   | 0.9953 | 3.774  | 0.539    |

### 3oa-chiral

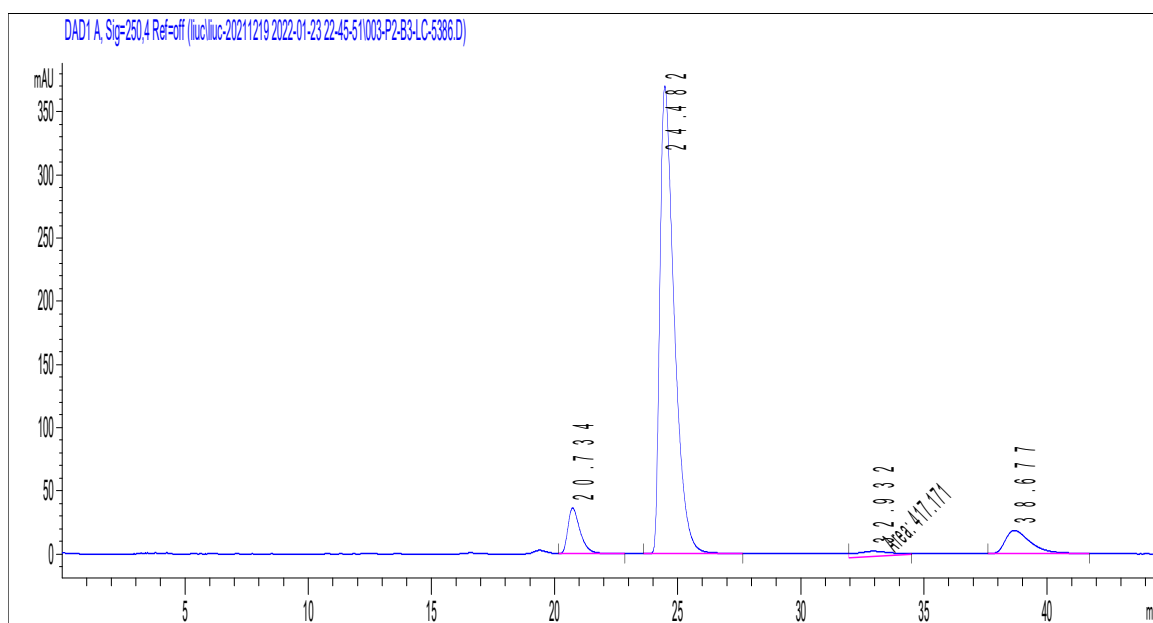



| # | Time   | Area    | Height | Width  | Area%  | Symmetry |
|---|--------|---------|--------|--------|--------|----------|
| 1 | 20.734 | 1246.7  | 36.1   | 0.5229 | 6.954  | 0.578    |
| 2 | 24.482 | 14963.3 | 370    | 0.6118 | 83.459 | 0.492    |
| 3 | 32.932 | 417.2   | 4.2    | 1.1535 | 2.327  | 1.107    |
| 4 | 38.677 | 1301.8  | 18.3   | 1.0124 | 7.261  | 0.529    |

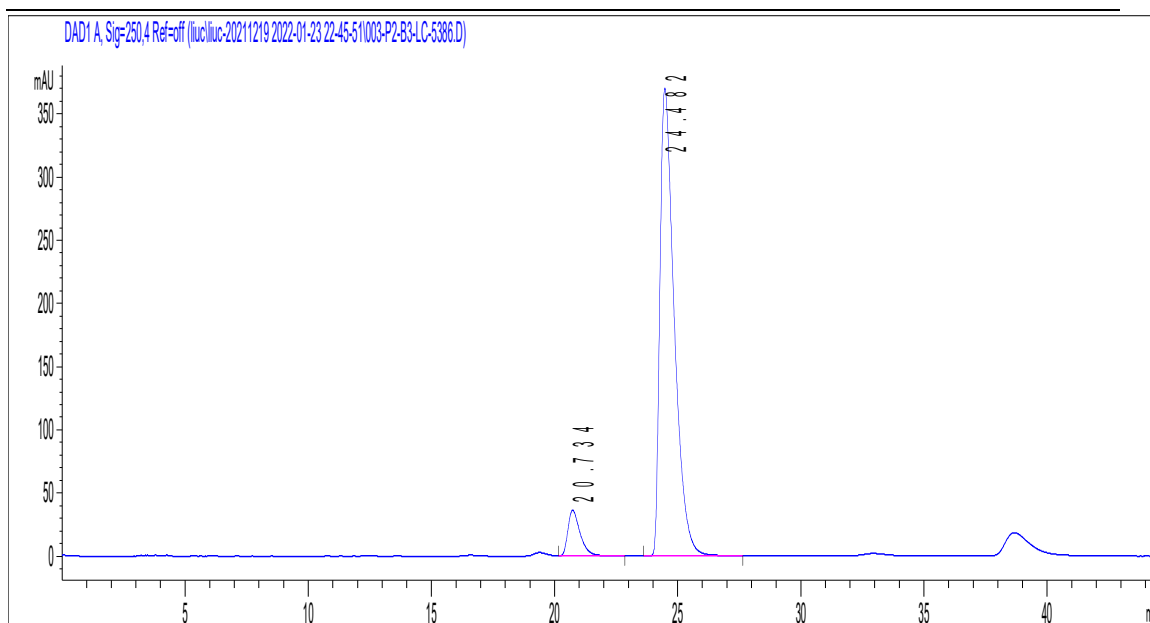

| # | Time   | Area    | Height | Width  | Area%  | Symmetry |
|---|--------|---------|--------|--------|--------|----------|
| 1 | 20.734 | 1246.7  | 36.1   | 0.5229 | 7.691  | 0.578    |
| 2 | 24.482 | 14963.3 | 370    | 0.6118 | 92.309 | 0.492    |



3eb-racmic

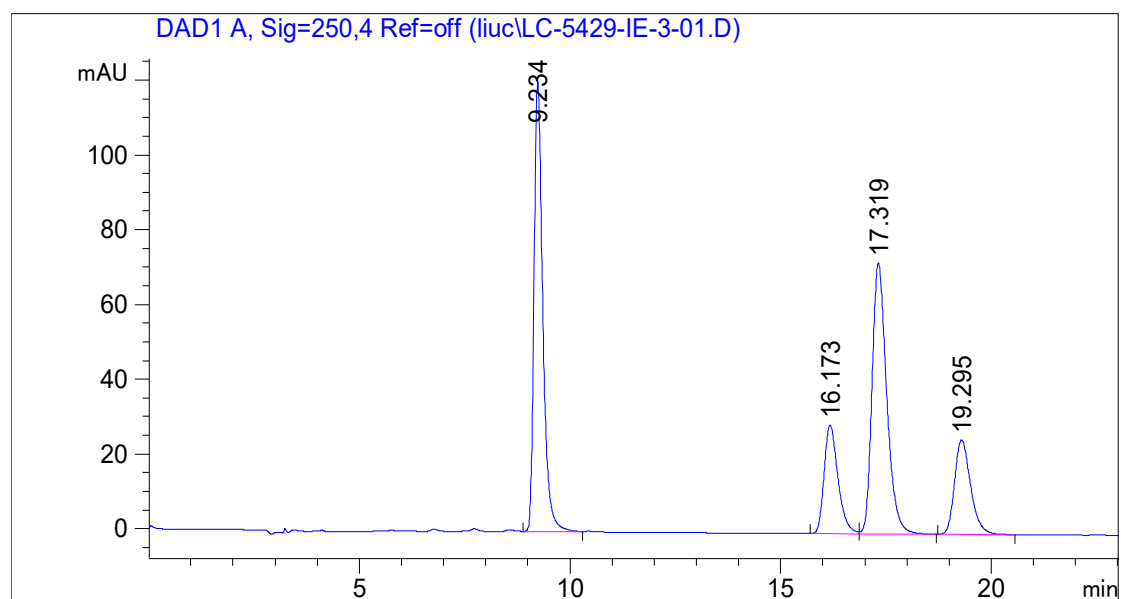

| # | Time   | Area   | Height | Width  | Area%  | Symmetry |
|---|--------|--------|--------|--------|--------|----------|
| 1 | 9.234  | 1740.2 | 120.5  | 0.2185 | 36.142 | 0.661    |
| 2 | 16.173 | 663.2  | 29     | 0.3484 | 13.774 | 0.704    |
| 3 | 17.319 | 1744.1 | 72.4   | 0.3691 | 36.224 | 0.704    |
| 4 | 19.295 | 667.3  | 25.2   | 0.4065 | 13.860 | 0.731    |

3eb-racmic

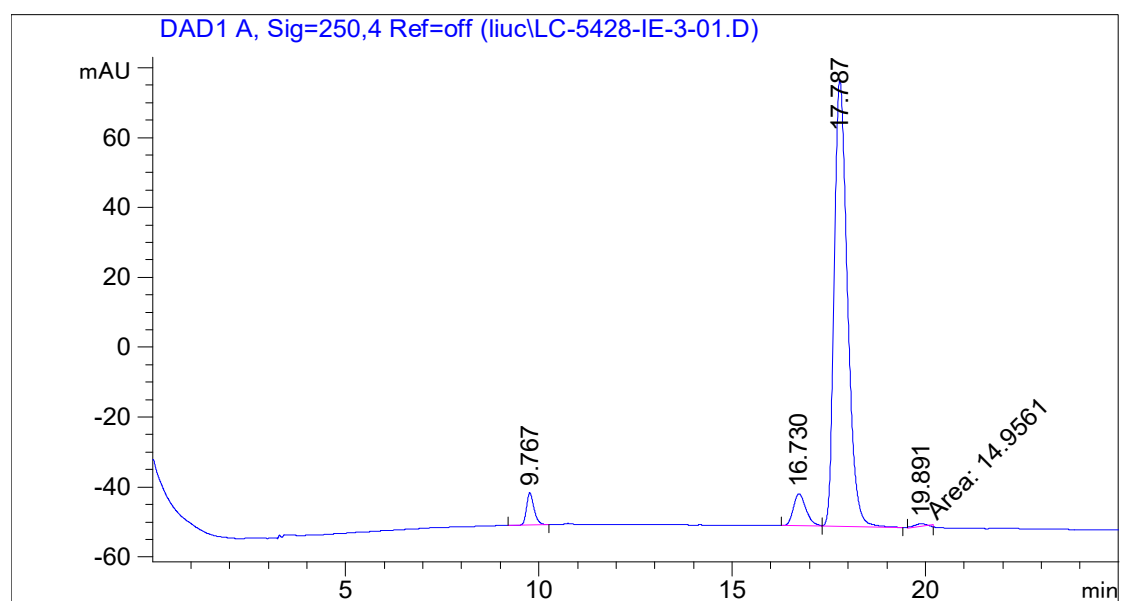



| # | Time   | Area   | Height | Width  | Area%  | Symmetry |
|---|--------|--------|--------|--------|--------|----------|
| 1 | 9.767  | 123.5  | 9.3    | 0.2037 | 3.593  | 0.737    |
| 2 | 16.73  | 207.1  | 9.2    | 0.343  | 6.025  | 0.748    |
| 3 | 17.787 | 3026.3 | 127.8  | 0.3643 | 88.035 | 0.684    |
| 4 | 19.891 | 80.7   | 2      | 0.6603 | 2.347  | 0.589    |

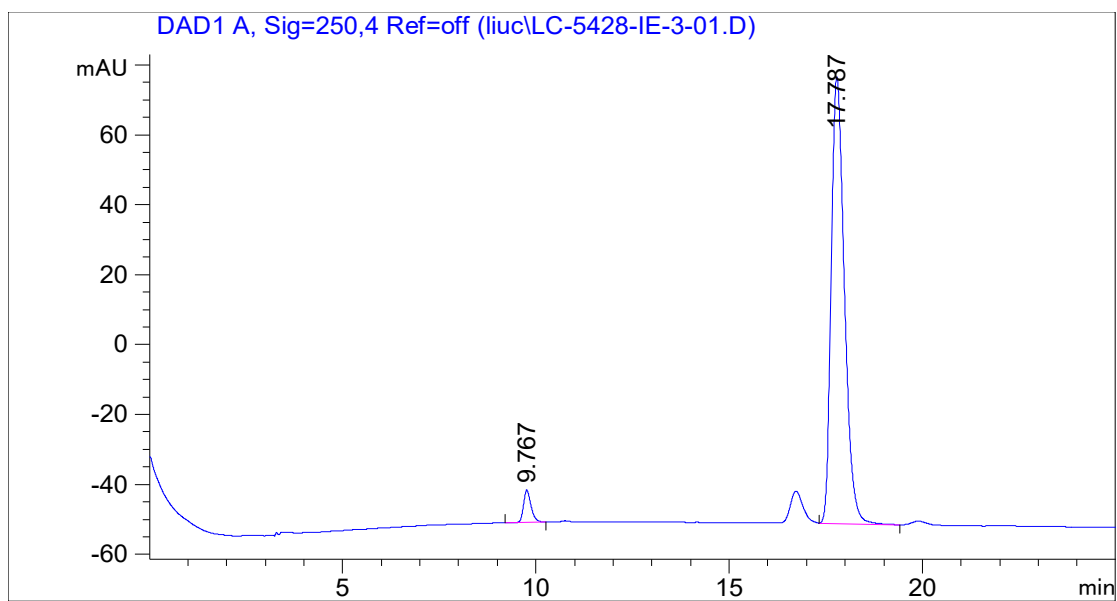

| # | Time   | Area   | Height | Width  | Area%  | Symmetry |
|---|--------|--------|--------|--------|--------|----------|
| 1 | 9.767  | 123.5  | 9.3    | 0.2037 | 3.922  | 0.737    |
| 2 | 17.787 | 3026.3 | 127.8  | 0.3643 | 96.078 | 0.684    |



### 3ec-racmic

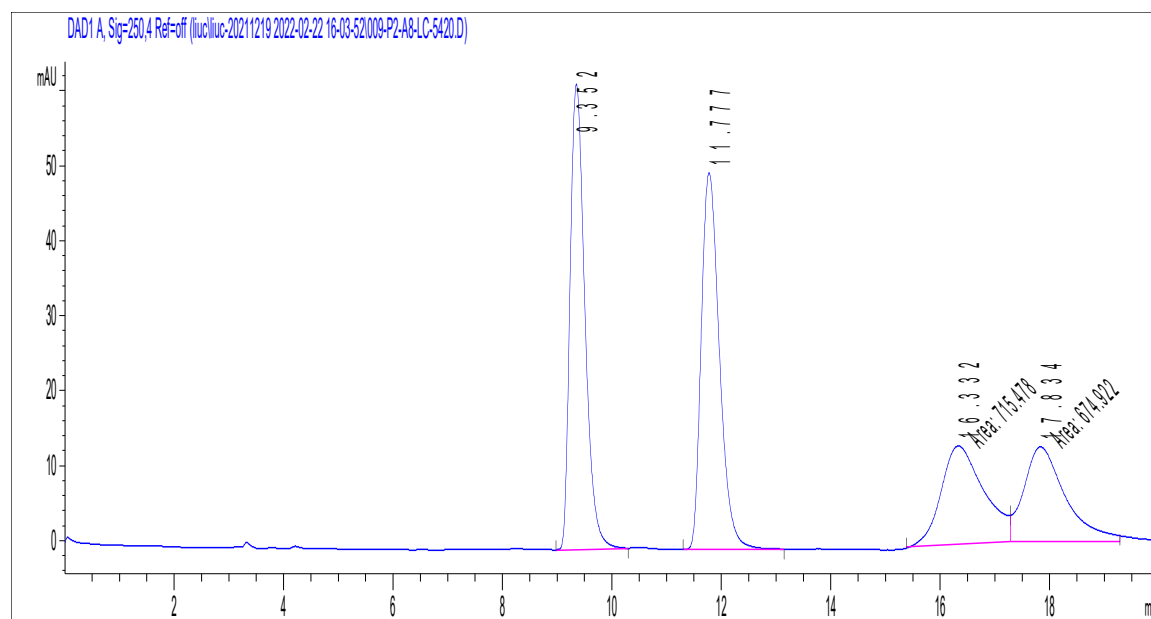

### 3ec-chiral

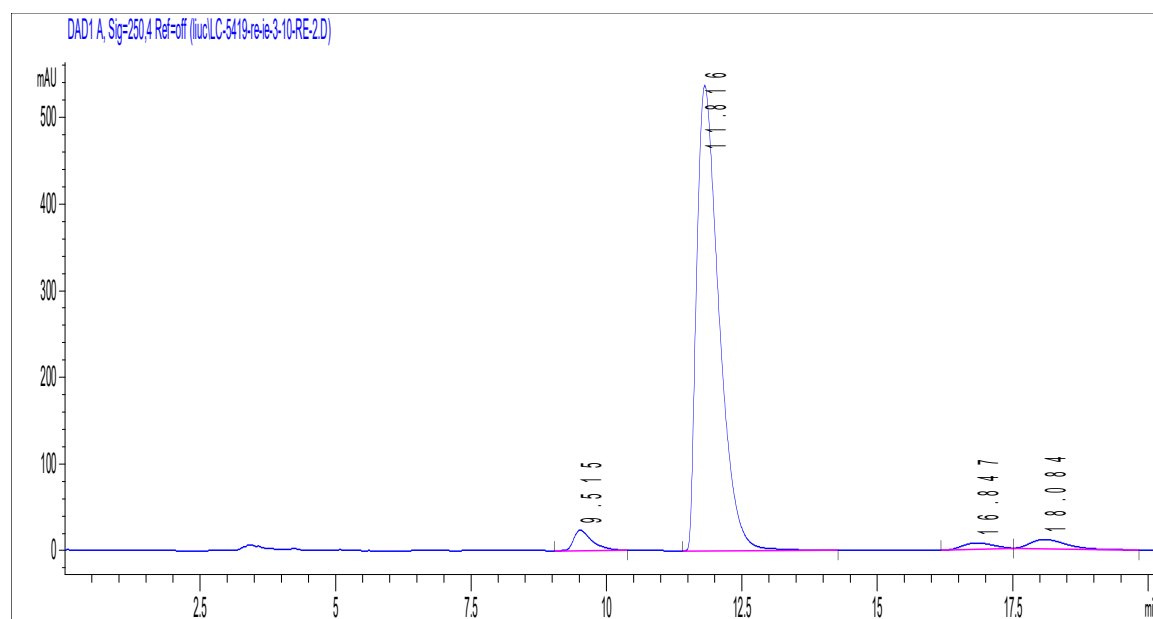



| # | Time   | Area    | Height | Width  | Area%  | Symmetry |
|---|--------|---------|--------|--------|--------|----------|
| 1 | 9.515  | 548.6   | 23.5   | 0.3525 | 3.296  | 0.508    |
| 2 | 11.816 | 15334.4 | 537.3  | 0.443  | 92.117 | 0.525    |
| 3 | 16.847 | 285.1   | 7.3    | 0.6106 | 1.713  | 0.958    |
| 4 | 18.084 | 478.6   | 10.5   | 0.6825 | 2.875  | 0.594    |

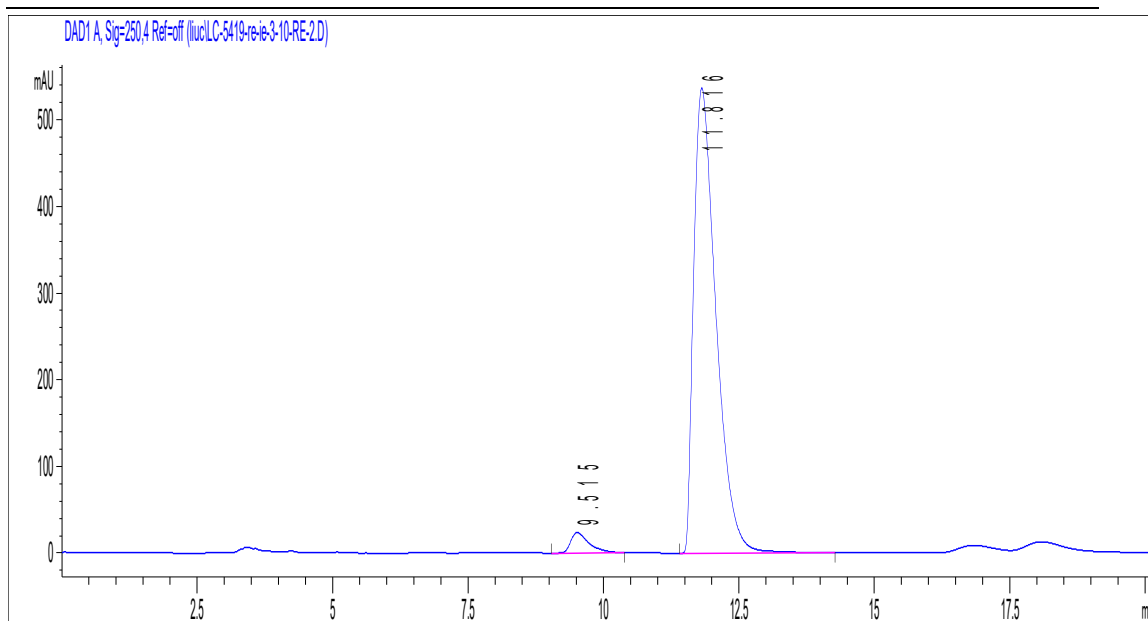

| # | Time   | Area    | Height | Width  | Area%  | Symmetry |
|---|--------|---------|--------|--------|--------|----------|
| 1 | 9.515  | 548.6   | 23.5   | 0.3525 | 3.454  | 0.508    |
| 2 | 11.816 | 15334.4 | 537.3  | 0.443  | 96.546 | 0.525    |



3ed-racmic

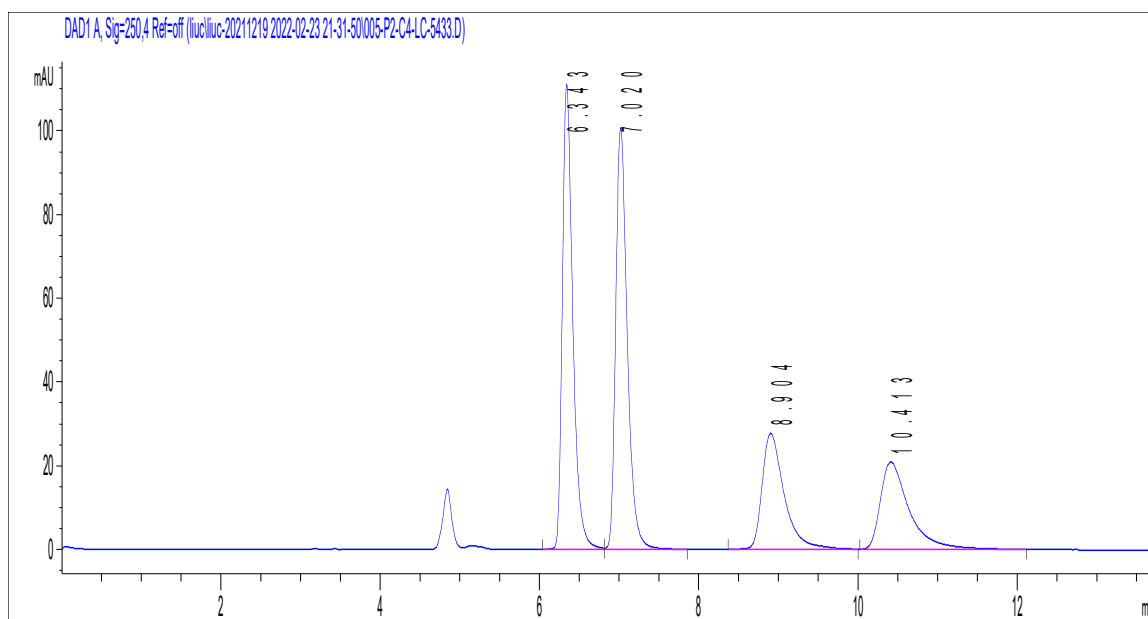

| # | Time   | Area   | Height | Width  | Area%  | Symmetry |
|---|--------|--------|--------|--------|--------|----------|
| 1 | 6.343  | 1013.1 | 111.1  | 0.1384 | 32.852 | 0.657    |
| 2 | 7.02   | 1014.3 | 100.9  | 0.1533 | 32.890 | 0.678    |
| 3 | 8.904  | 536.7  | 27.8   | 0.2894 | 17.402 | 0.584    |
| 4 | 10.413 | 519.8  | 20.8   | 0.3689 | 16.856 | 0.52     |

3ed-chiral

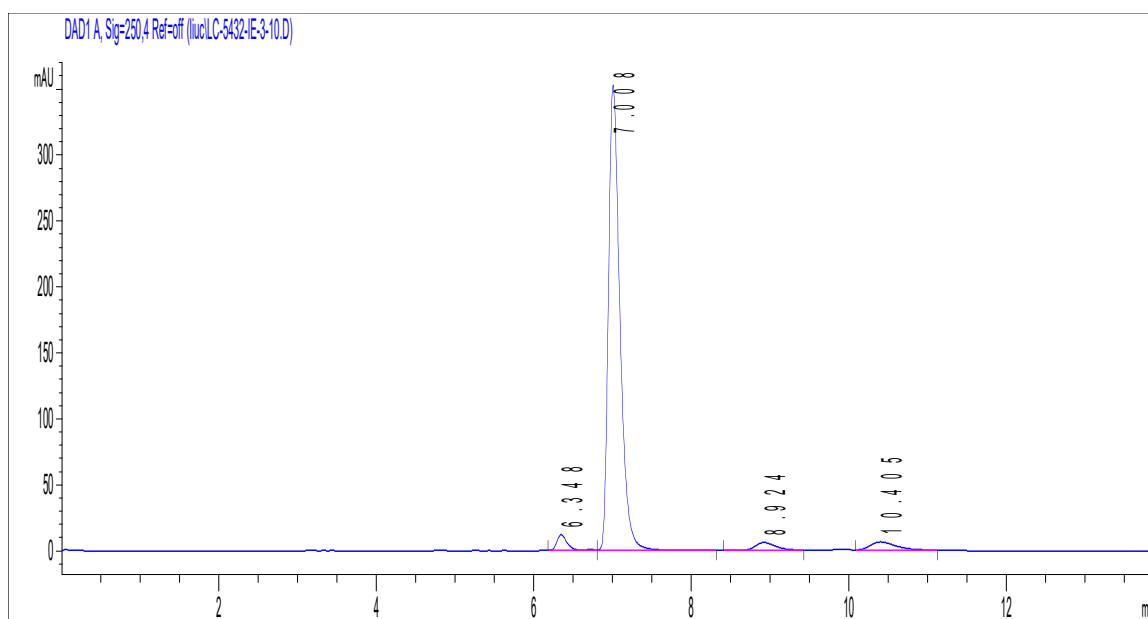



| # | Time   | Area   | Height | Width  | Area%  | Symmetry |
|---|--------|--------|--------|--------|--------|----------|
| 1 | 6.348  | 110.4  | 11.9   | 0.1404 | 2.815  | 0.625    |
| 2 | 7.008  | 3566.5 | 352.9  | 0.1539 | 90.979 | 0.632    |
| 3 | 8.924  | 105.9  | 5.9    | 0.2735 | 2.702  | 0.751    |
| 4 | 10.405 | 137.3  | 6.1    | 0.3396 | 3.503  | 0.604    |

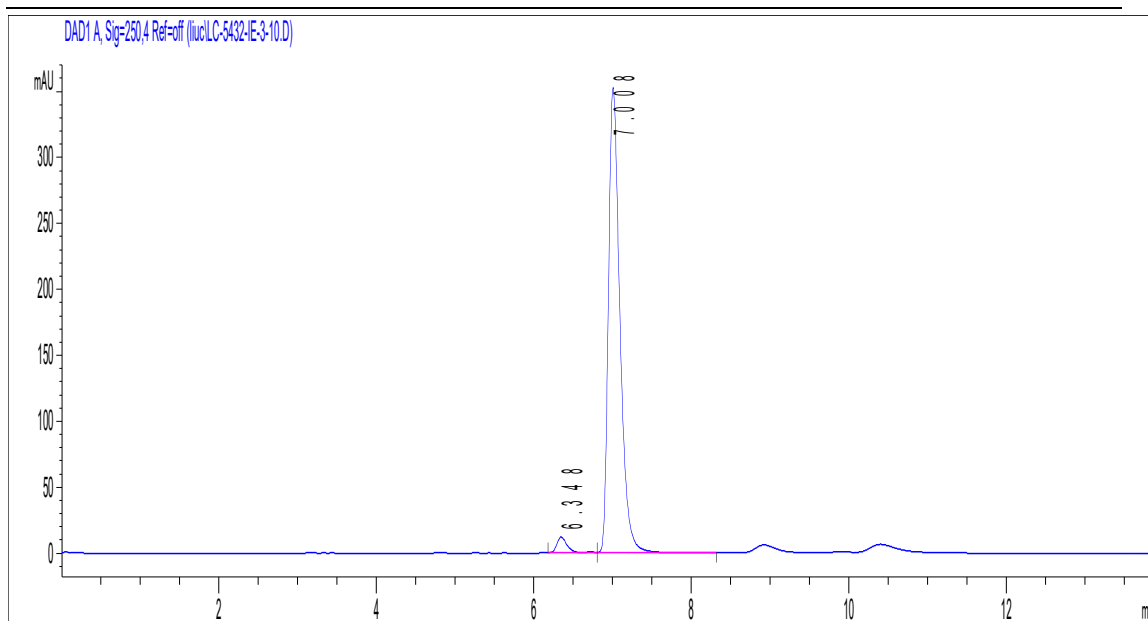

| # | Time  | Area   | Height | Width  | Area%  | Symmetry |
|---|-------|--------|--------|--------|--------|----------|
| 1 | 6.348 | 110.4  | 11.9   | 0.1404 | 3.002  | 0.625    |
| 2 | 7.008 | 3566.5 | 352.9  | 0.1539 | 96.998 | 0.632    |



3ee-racmic

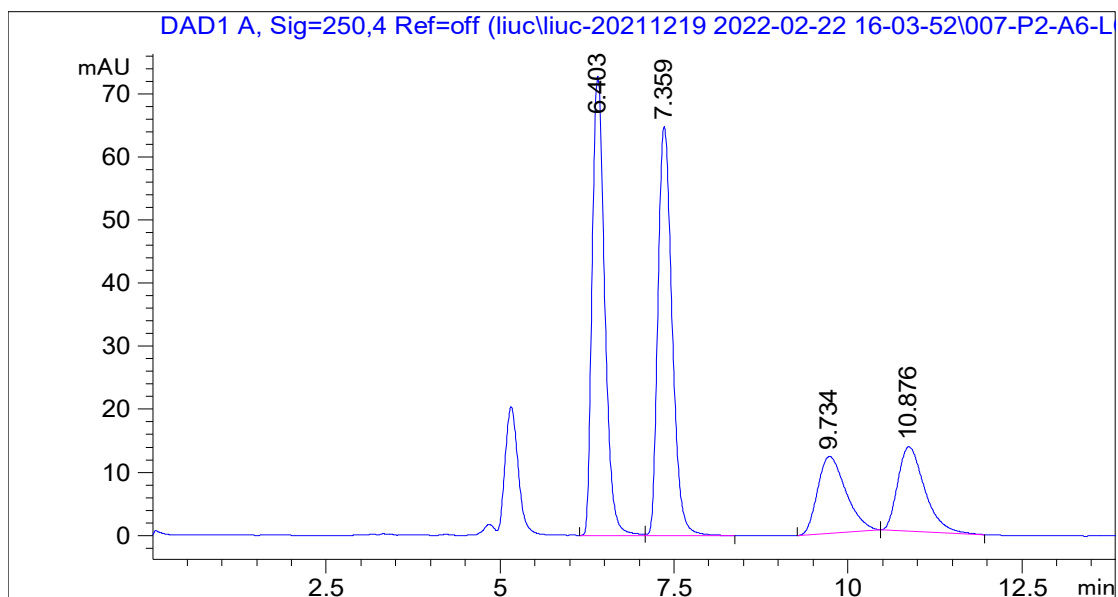

| # | Time   | Area  | Height | Width  | Area%  | Symmetry |
|---|--------|-------|--------|--------|--------|----------|
| 1 | 6.403  | 913.5 | 72.7   | 0.1965 | 36.027 | 0.726    |
| 2 | 7.359  | 916.8 | 64.8   | 0.2231 | 36.159 | 0.733    |
| 3 | 9.734  | 345.3 | 12.2   | 0.4357 | 13.620 | 0.684    |
| 4 | 10.876 | 359.9 | 13.4   | 0.4096 | 14.194 | 0.658    |

3ee-chiral

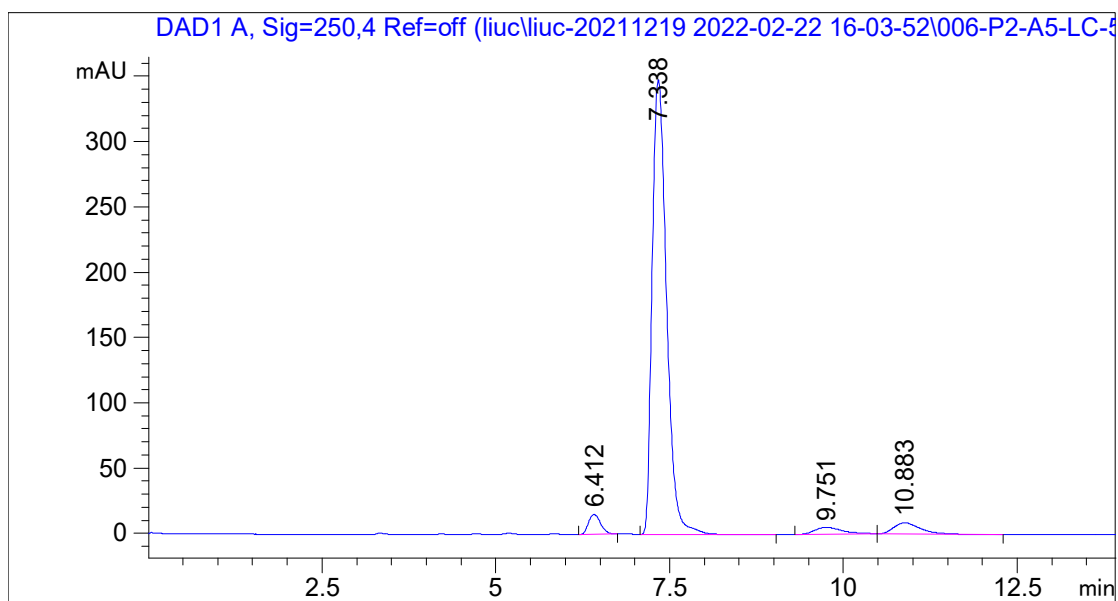



| # | Time   | Area   | Height | Width  | Area%  | Symmetry |
|---|--------|--------|--------|--------|--------|----------|
| 1 | 6.412  | 186.7  | 15.3   | 0.1926 | 3.353  | 0.781    |
| 2 | 7.338  | 5001.2 | 348.5  | 0.2254 | 89.835 | 0.686    |
| 3 | 9.751  | 149.7  | 5.2    | 0.4409 | 2.689  | 0.658    |
| 4 | 10.883 | 229.5  | 8.5    | 0.4086 | 4.123  | 0.638    |

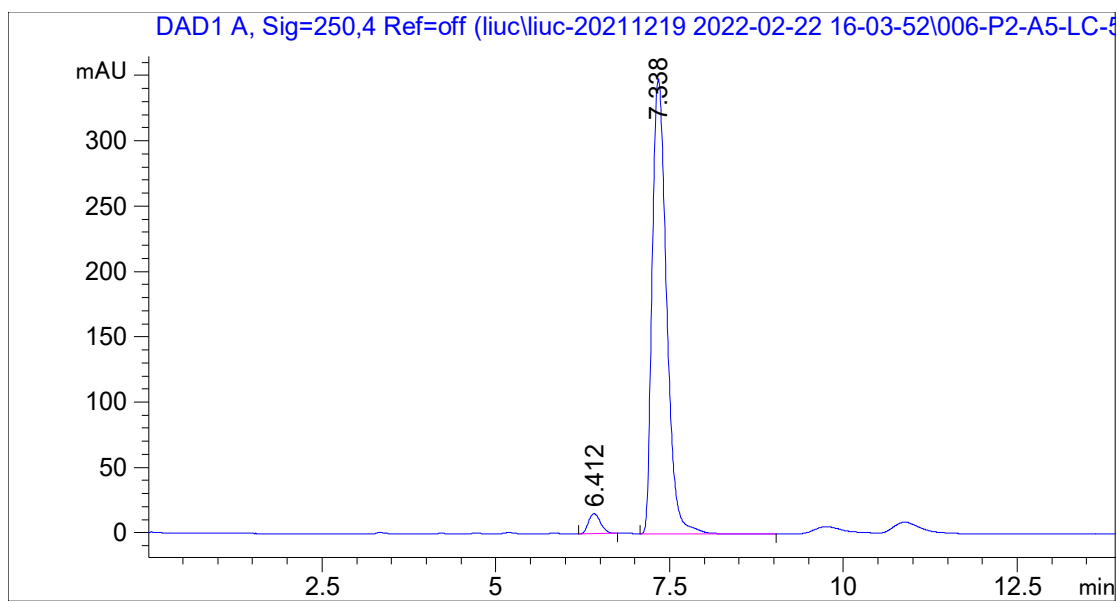

| # | Time  | Area   | Height | Width  | Area%  | Symmetry |
|---|-------|--------|--------|--------|--------|----------|
| 1 | 6.412 | 186.7  | 15.3   | 0.1926 | 3.598  | 0.781    |
| 2 | 7.338 | 5001.2 | 348.5  | 0.2254 | 96.402 | 0.686    |



### 3ef-racmic

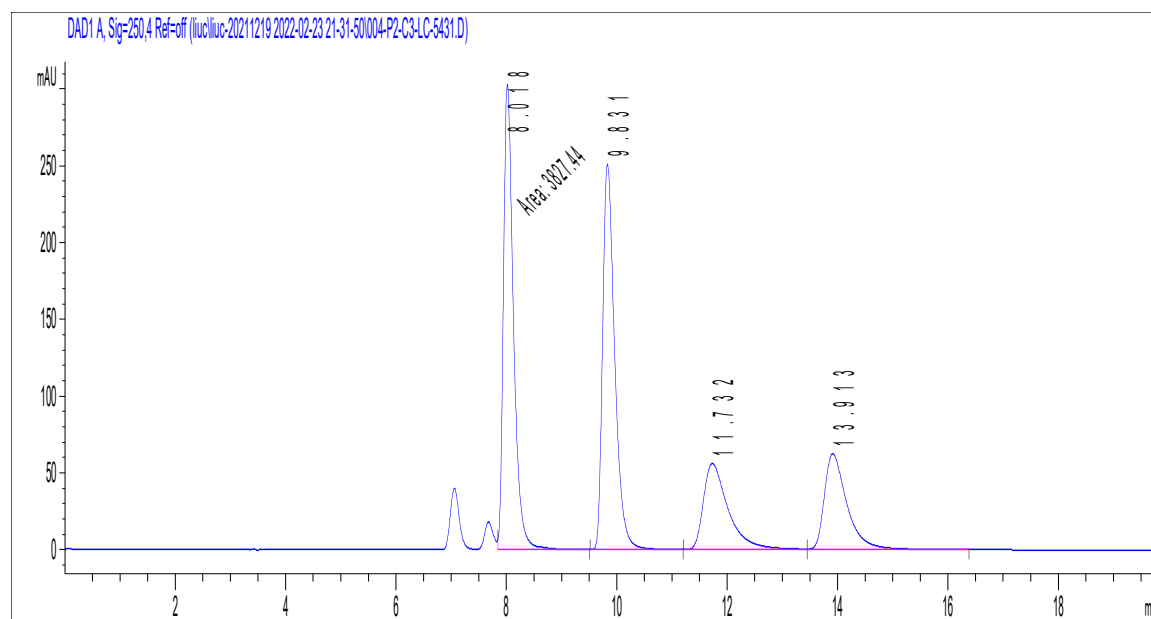

### 3ef-chiral

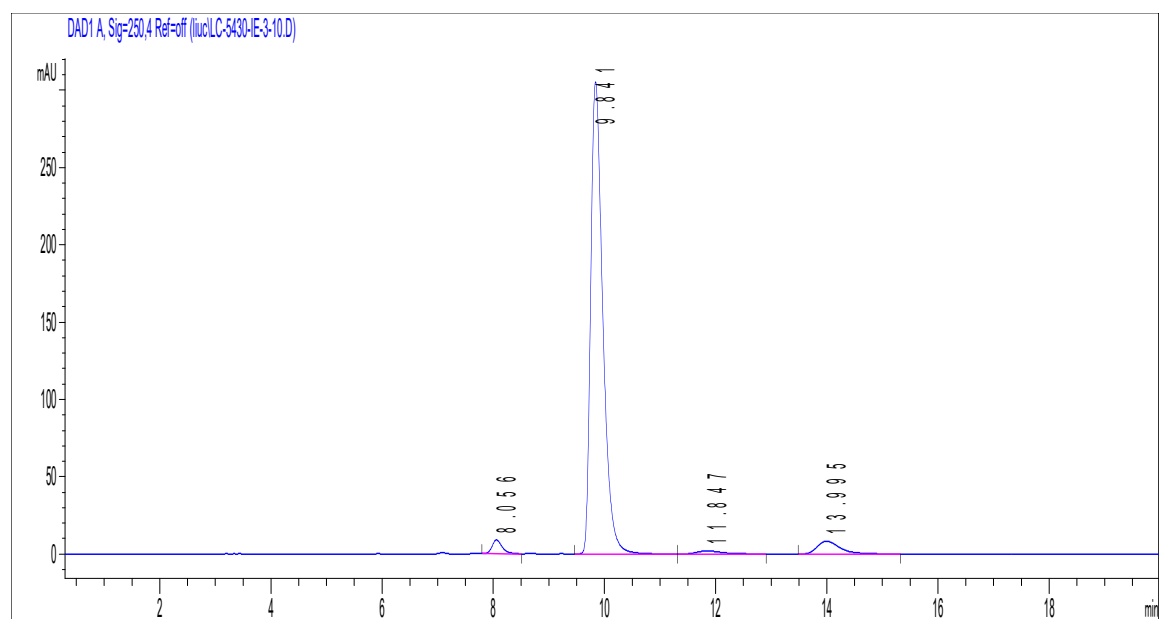



| # | Time   | Area   | Height | Width  | Area%  | Symmetry |
|---|--------|--------|--------|--------|--------|----------|
| 1 | 8.056  | 113.9  | 9      | 0.1922 | 2.256  | 0.692    |
| 2 | 9.841  | 4626.2 | 305.6  | 0.2326 | 91.625 | 0.613    |
| 3 | 11.847 | 64.1   | 2.1    | 0.4444 | 1.269  | 0.63     |
| 4 | 13.995 | 244.9  | 8.4    | 0.4468 | 4.850  | 0.617    |

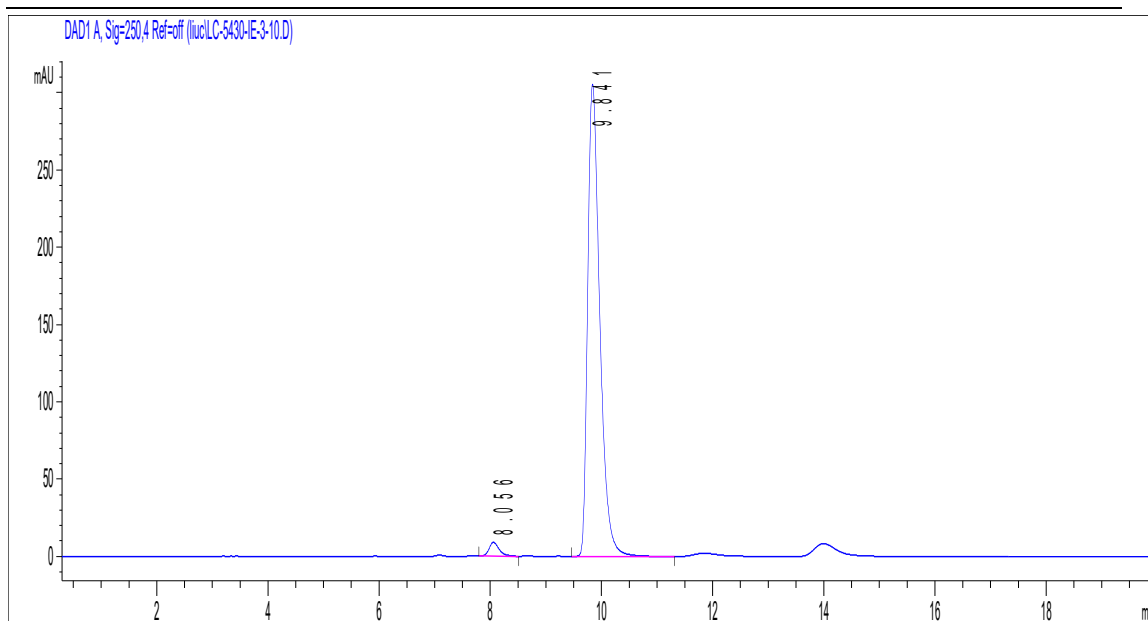

| # | Time  | Area   | Height | Width  | Area%  | Symmetry |
|---|-------|--------|--------|--------|--------|----------|
| 1 | 8.056 | 113.9  | 9      | 0.1922 | 2.403  | 0.692    |
| 2 | 9.841 | 4626.2 | 305.6  | 0.2326 | 97.597 | 0.613    |



3eg-racmic

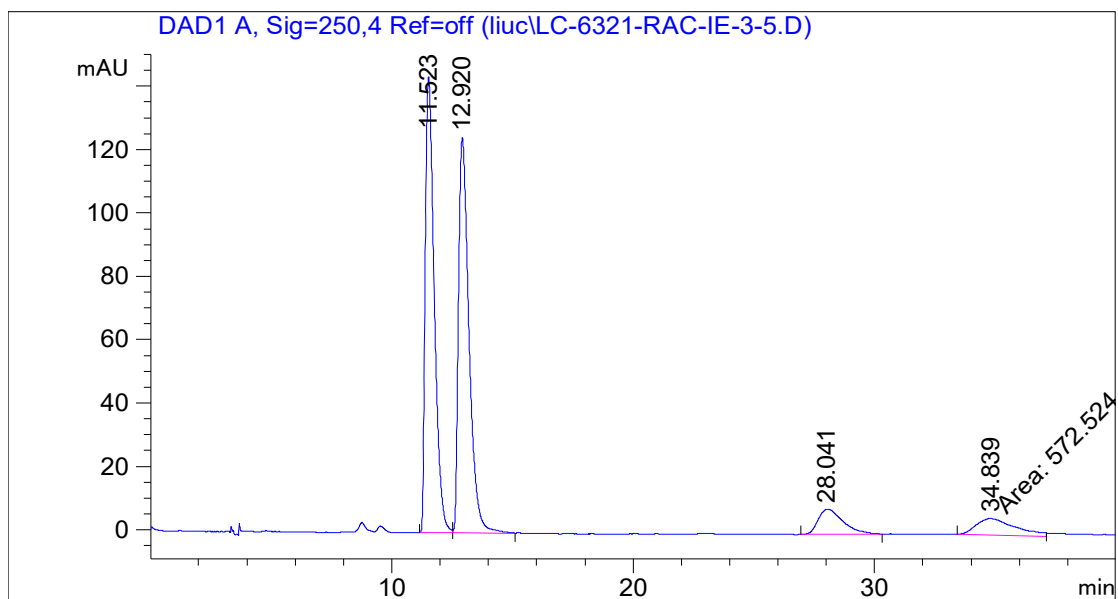

| # | Time   | Area   | Height | Width  | Area%  | Symmetry |
|---|--------|--------|--------|--------|--------|----------|
| 1 | 11.523 | 3742.1 | 143.8  | 0.4036 | 43.291 | 0.538    |
| 2 | 12.92  | 3764.6 | 124.7  | 0.4641 | 43.552 | 0.522    |
| 3 | 28.041 | 564.8  | 7.9    | 0.8565 | 6.534  | 0.565    |
| 4 | 34.839 | 572.5  | 5.1    | 1.8542 | 6.623  | 0.504    |

3eg-chiral

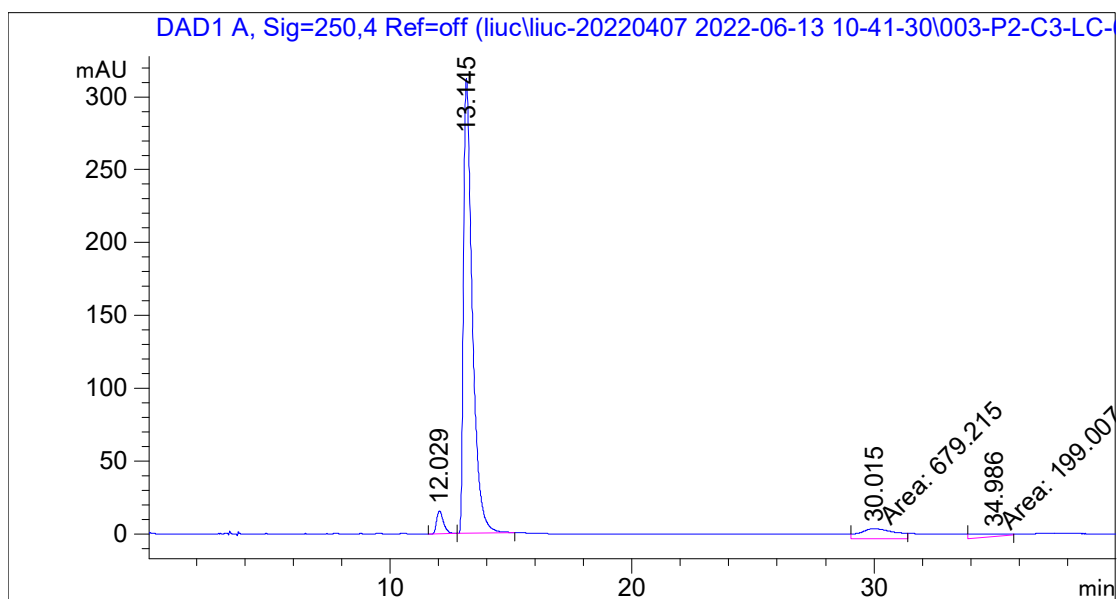



| # | Time   | Area   | Height | Width  | Area%  | Symmetry |
|---|--------|--------|--------|--------|--------|----------|
| 1 | 12.029 | 317.3  | 15.9   | 0.3047 | 3.471  | 0.646    |
| 2 | 13.145 | 7947.8 | 312.2  | 0.381  | 86.924 | 0.445    |
| 3 | 30.015 | 679.2  | 6.7    | 1.6892 | 7.429  | 0.659    |
| 4 | 34.986 | 199    | 1.6    | 1.4528 | 2.177  | 0        |

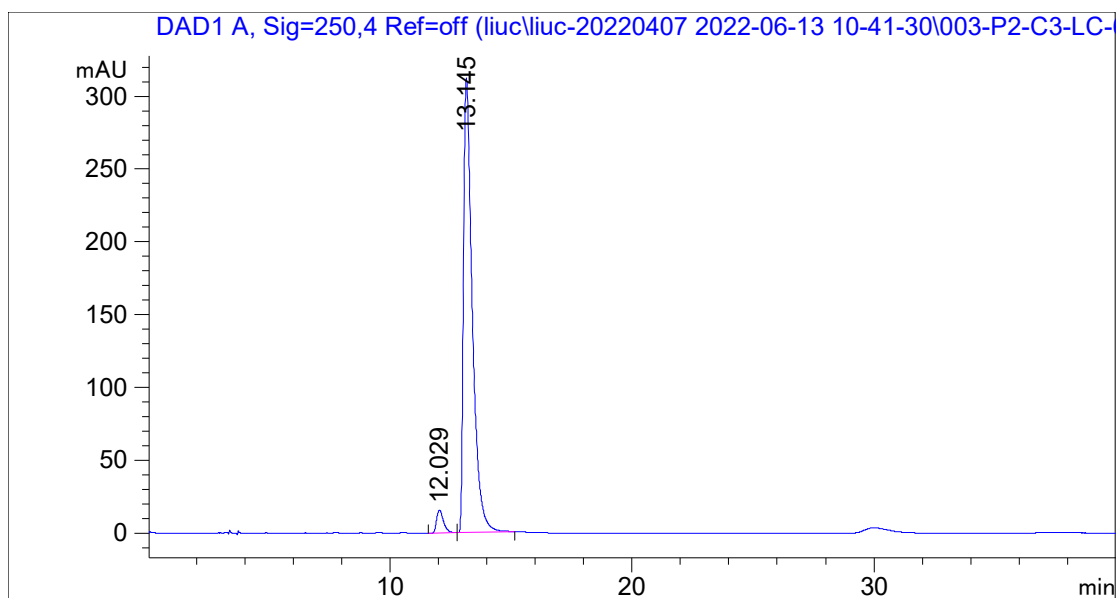

| # | Time   | Area   | Height | Width  | Area%  | Symmetry |
|---|--------|--------|--------|--------|--------|----------|
| 1 | 12.029 | 317.3  | 15.9   | 0.3047 | 3.839  | 0.646    |
| 2 | 13.145 | 7947.8 | 312.2  | 0.381  | 96.161 | 0.445    |



### 3eh-racmic

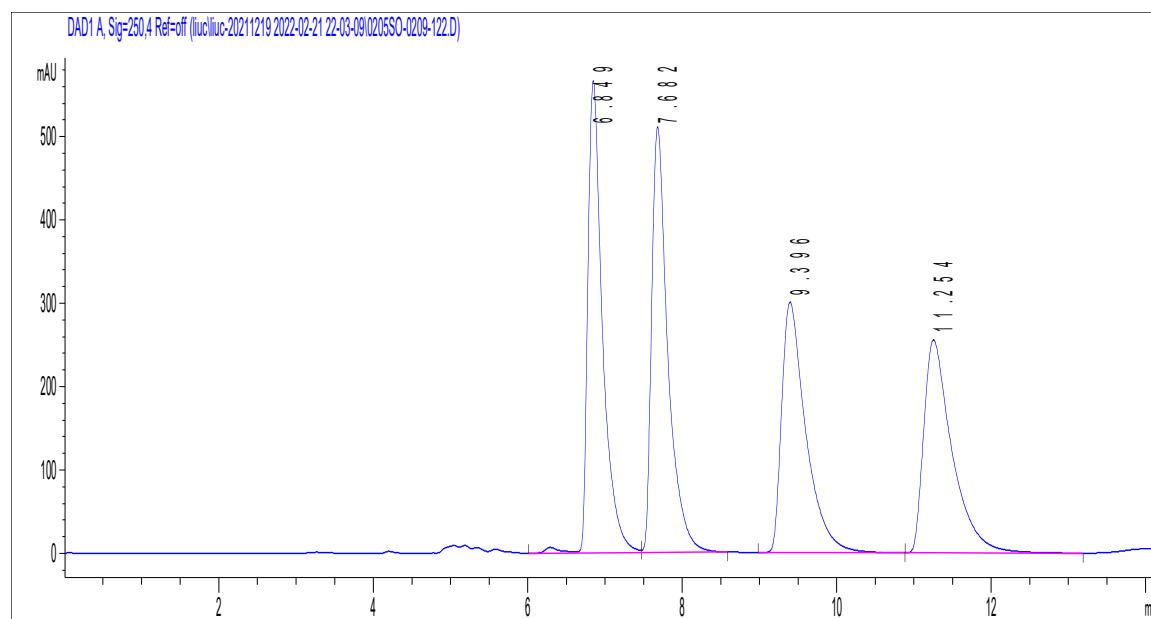

| # | Time   | Area   | Height | Width  | Area%  | Symmetry |
|---|--------|--------|--------|--------|--------|----------|
| 1 | 6.849  | 7561.8 | 566.5  | 0.1978 | 26.926 | 0.567    |
| 2 | 7.682  | 7454.9 | 511.2  | 0.2182 | 26.546 | 0.53     |
| 3 | 9.396  | 6544.9 | 301    | 0.3197 | 23.305 | 0.483    |
| 4 | 11.254 | 6521.6 | 255.9  | 0.3733 | 23.222 | 0.48     |

### 3eh-chiral

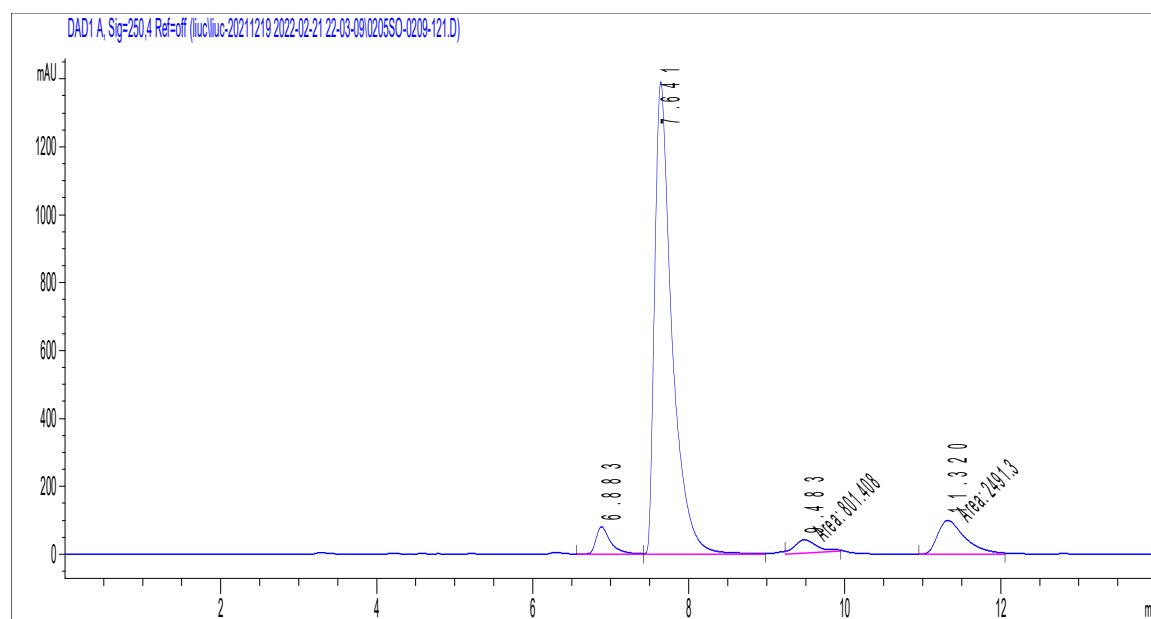



| # | Time  | Area    | Height | Width  | Area%  | Symmetry |
|---|-------|---------|--------|--------|--------|----------|
| 1 | 6.883 | 1009.8  | 79.9   | 0.1915 | 3.922  | 0.573    |
| 2 | 7.641 | 21447.1 | 1390.3 | 0.23   | 83.291 | 0.487    |
| 3 | 9.483 | 801.4   | 39.8   | 0.336  | 3.112  | 0.801    |
| 4 | 11.32 | 2491.3  | 100.6  | 0.4128 | 9.675  | 0.56     |

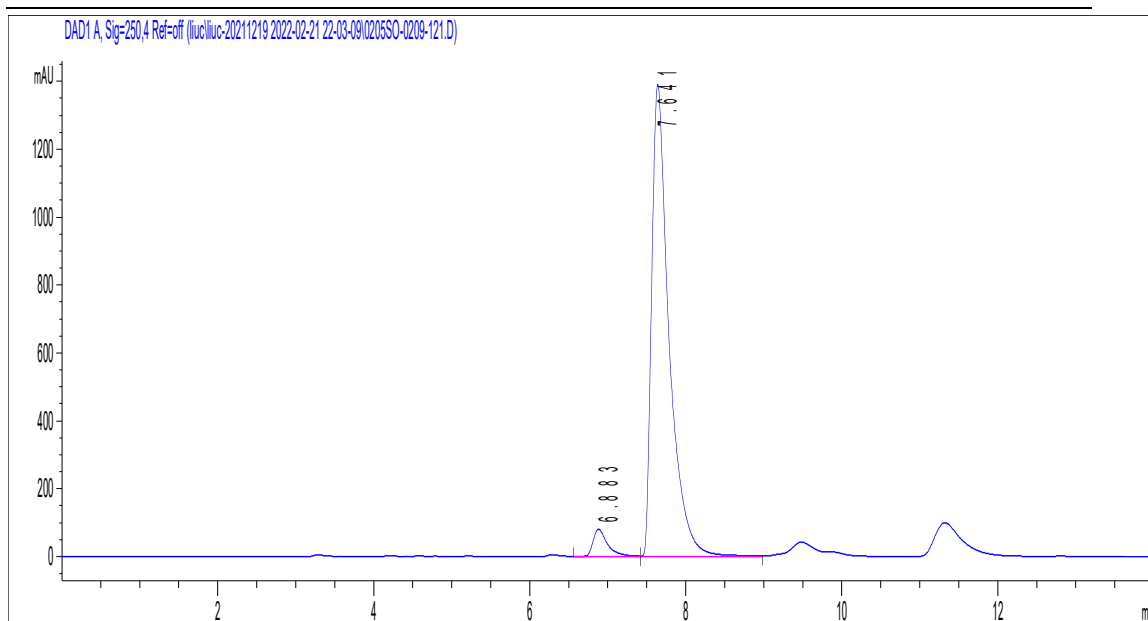

| # | Time  | Area    | Height | Width  | Area%  | Symmetry |
|---|-------|---------|--------|--------|--------|----------|
| 1 | 6.883 | 1009.8  | 79.9   | 0.1915 | 4.497  | 0.573    |
| 2 | 7.641 | 21447.1 | 1390.3 | 0.23   | 95.503 | 0.487    |



3ei-racmic

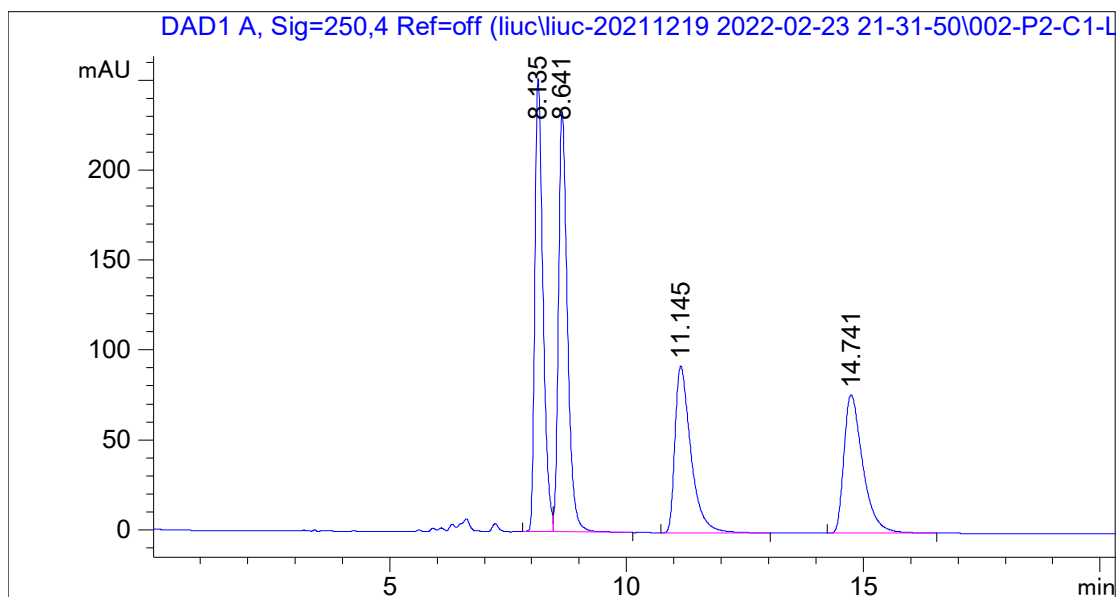

| # | Time   | Area   | Height | Width  | Area%  | Symmetry |
|---|--------|--------|--------|--------|--------|----------|
| 1 | 8.135  | 3002.7 | 252.1  | 0.183  | 28.882 | 0.65     |
| 2 | 8.641  | 3095.9 | 233.9  | 0.2024 | 29.778 | 0.644    |
| 3 | 11.145 | 2156.3 | 92.8   | 0.347  | 20.740 | 0.522    |
| 4 | 14.741 | 2141.7 | 77.1   | 0.4223 | 20.600 | 0.565    |

3ei-chiral

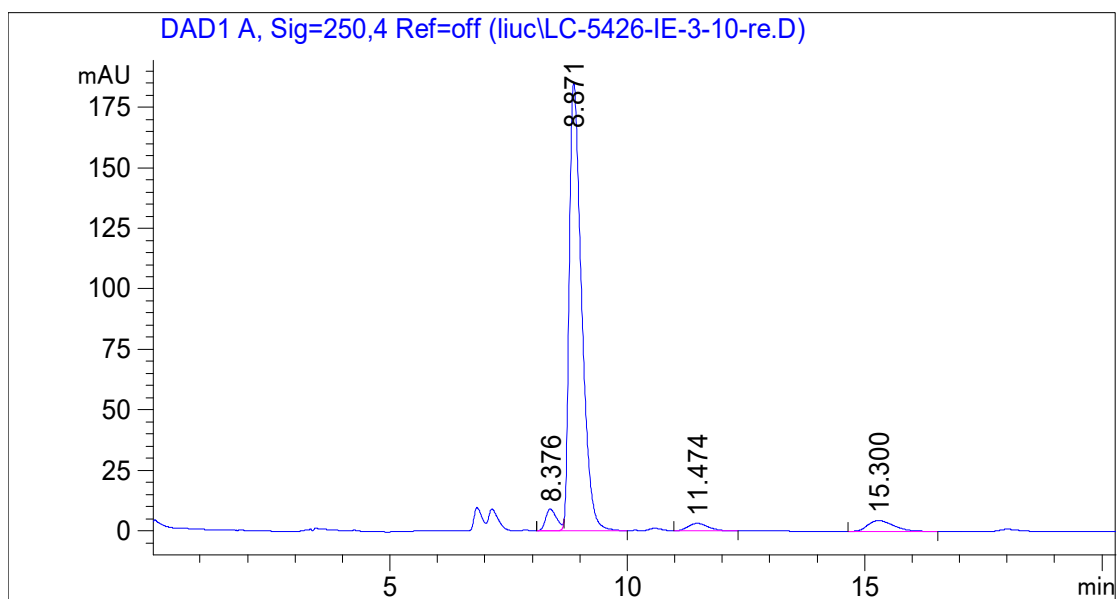



| # | Time   | Area   | Height | Width  | Area%  | Symmetry |
|---|--------|--------|--------|--------|--------|----------|
| 1 | 8.376  | 143.2  | 9      | 0.2439 | 3.806  | 0.672    |
| 2 | 8.871  | 3352.6 | 185.2  | 0.2752 | 89.095 | 0.673    |
| 3 | 11.474 | 91.1   | 3.1    | 0.4161 | 2.422  | 0.801    |
| 4 | 15.3   | 176    | 4.5    | 0.5447 | 4.676  | 0.657    |

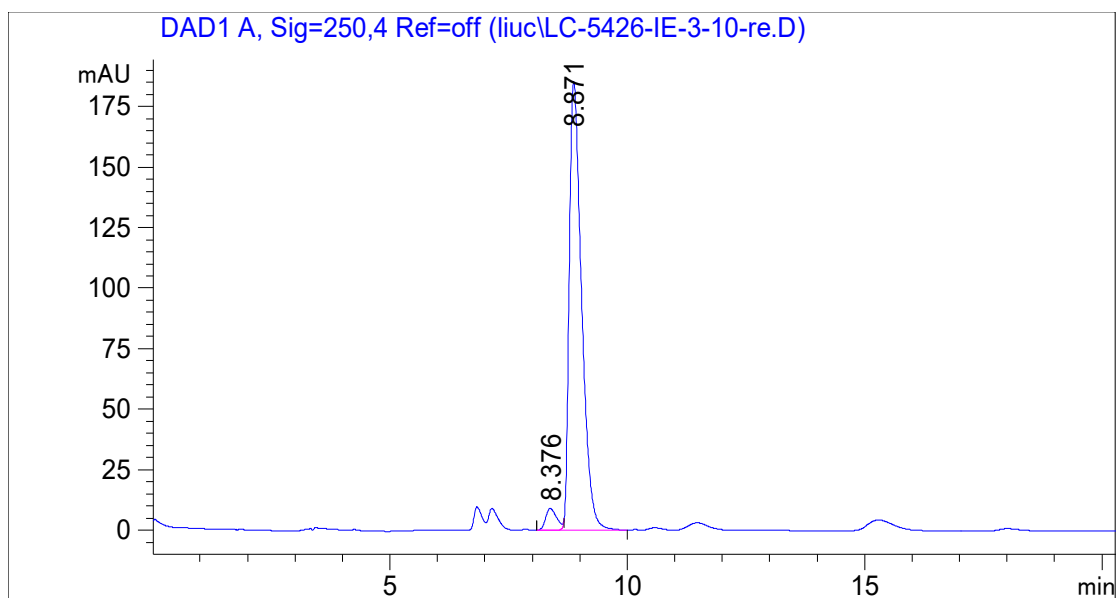

| # | Time  | Area   | Height | Width  | Area%  | Symmetry |
|---|-------|--------|--------|--------|--------|----------|
| 1 | 8.376 | 143.2  | 9      | 0.2439 | 4.097  | 0.672    |
| 2 | 8.871 | 3352.6 | 185.2  | 0.2752 | 95.903 | 0.673    |



3ej-racmic

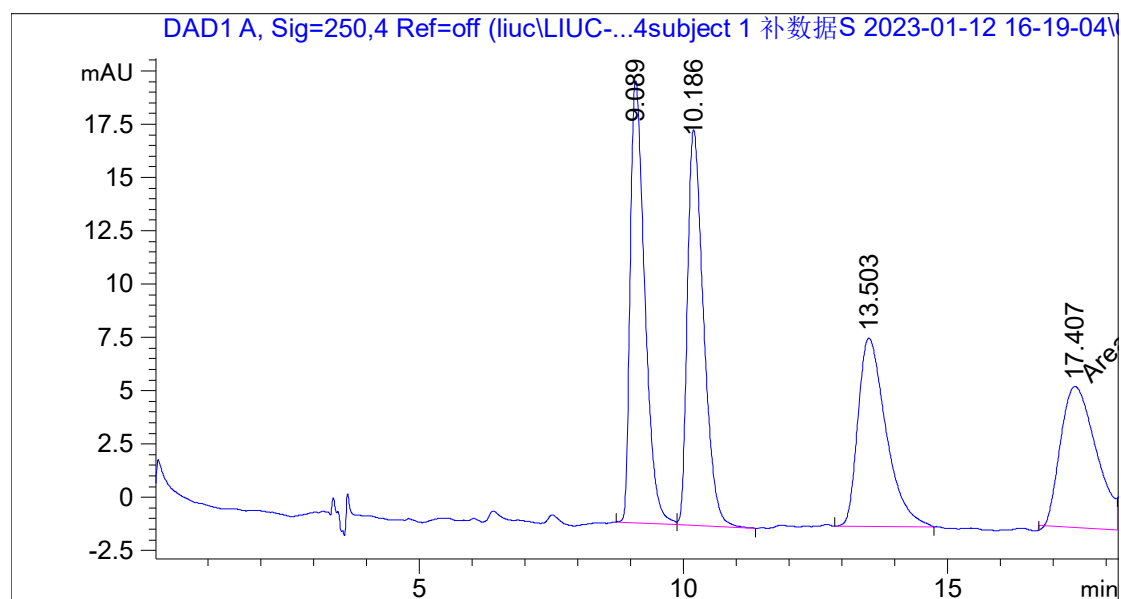

| # | Time   | Area  | Height | Width  | Area%  | Symmetry |
|---|--------|-------|--------|--------|--------|----------|
| 1 | 9.089  | 397.5 | 20.7   | 0.2916 | 27.613 | 0.548    |
| 2 | 10.186 | 396.2 | 18.6   | 0.325  | 27.523 | 0.579    |
| 3 | 13.503 | 325.6 | 8.8    | 0.548  | 22.619 | 0.591    |
| 4 | 17.407 | 320.2 | 6.8    | 0.7905 | 22.244 | 0.677    |

3ej-chiral

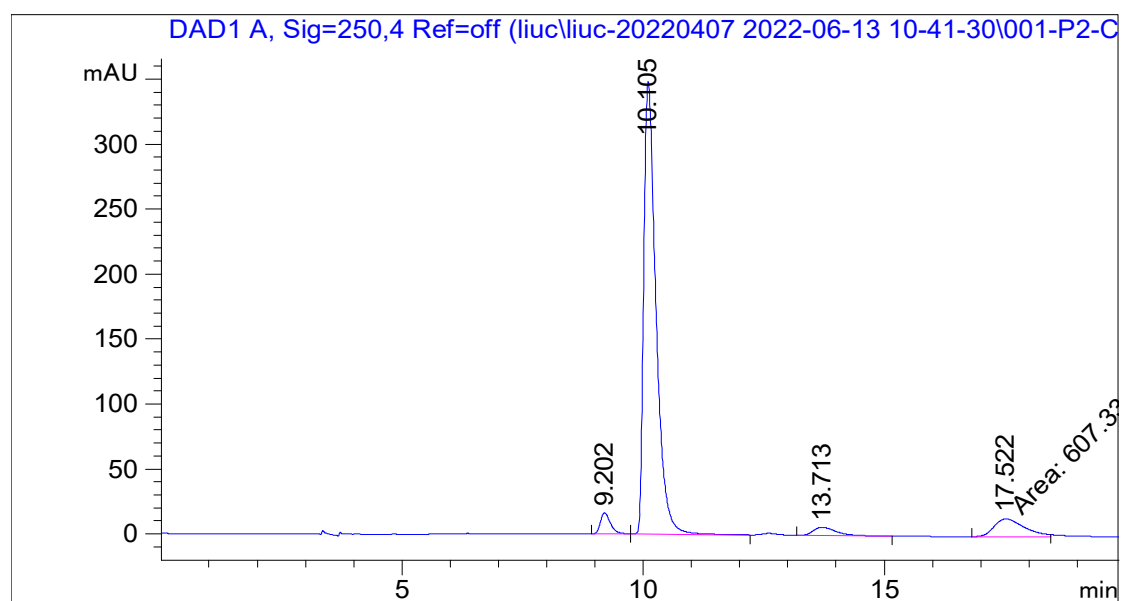



| # | Time   | Area   | Height | Width  | Area%  | Symmetry |
|---|--------|--------|--------|--------|--------|----------|
| 1 | 9.202  | 228.3  | 16     | 0.2203 | 3.182  | 0.683    |
| 2 | 10.105 | 6123.8 | 348.4  | 0.2671 | 85.358 | 0.512    |
| 3 | 13.713 | 214.8  | 6.5    | 0.4945 | 2.995  | 0.592    |
| 4 | 17.522 | 607.3  | 13.7   | 0.7373 | 8.466  | 0.604    |

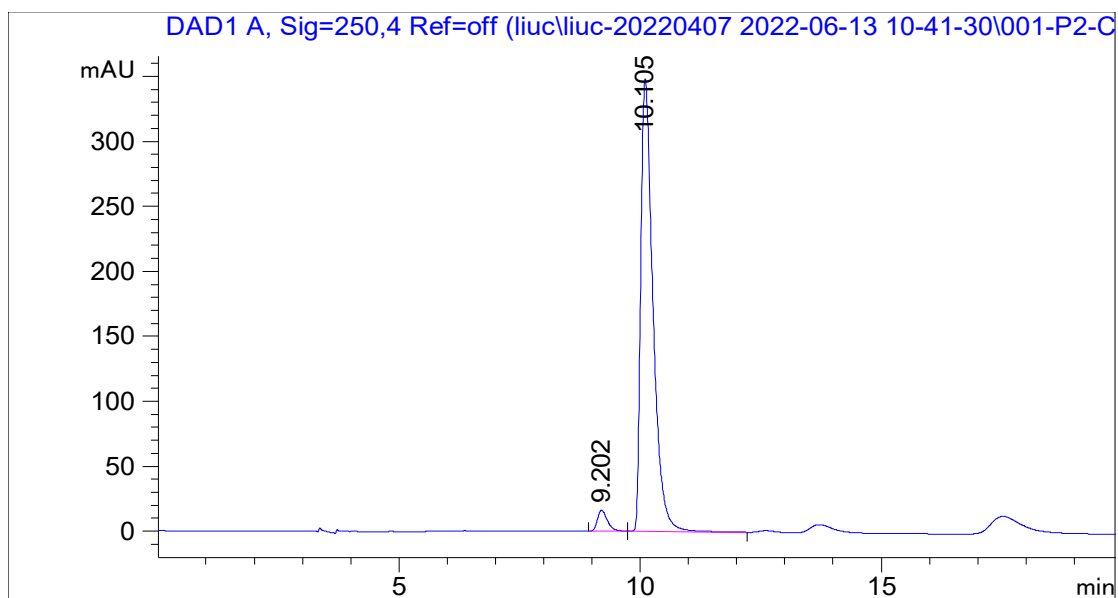

| # | Time   | Area   | Height | Width  | Area%  | Symmetry |
|---|--------|--------|--------|--------|--------|----------|
| 1 | 9.202  | 228.3  | 16     | 0.2203 | 3.594  | 0.683    |
| 2 | 10.105 | 6123.8 | 348.4  | 0.2671 | 96.406 | 0.512    |



3ek-racmic

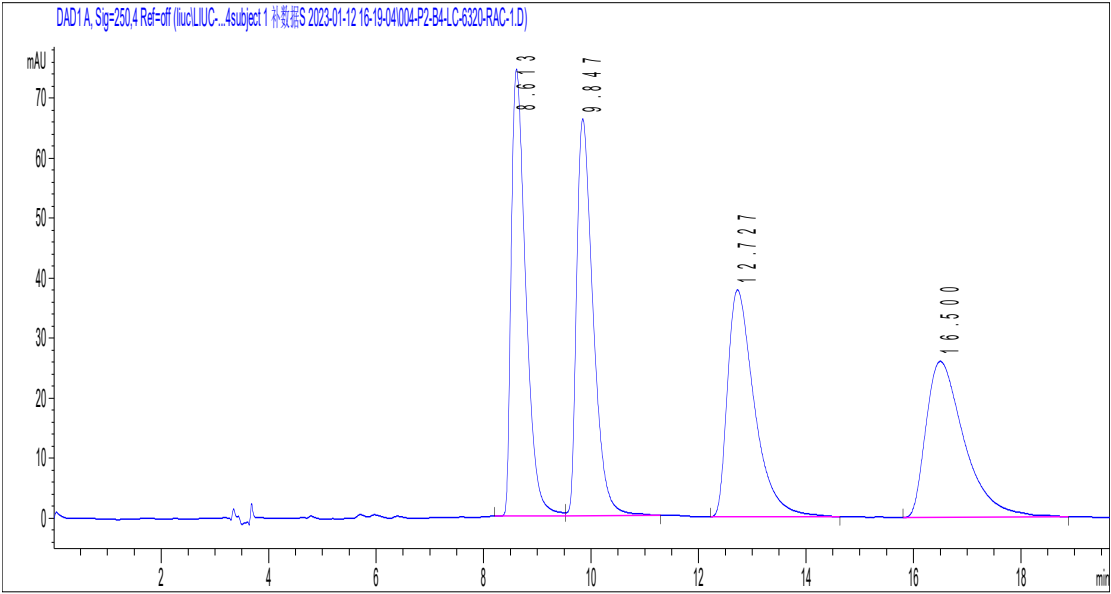

| # | Time   | Area   | Height | Width  | Area%  | Symmetry |
|---|--------|--------|--------|--------|--------|----------|
| 1 | 8.613  | 1404.2 | 74.5   | 0.2859 | 25.901 | 0.52     |
| 2 | 9.847  | 1412.9 | 66.2   | 0.327  | 26.061 | 0.548    |
| 3 | 12.727 | 1317.1 | 37.8   | 0.524  | 24.295 | 0.54     |
| 4 | 16.5   | 1287.2 | 26     | 0.7494 | 23.743 | 0.553    |

3ek-chiral

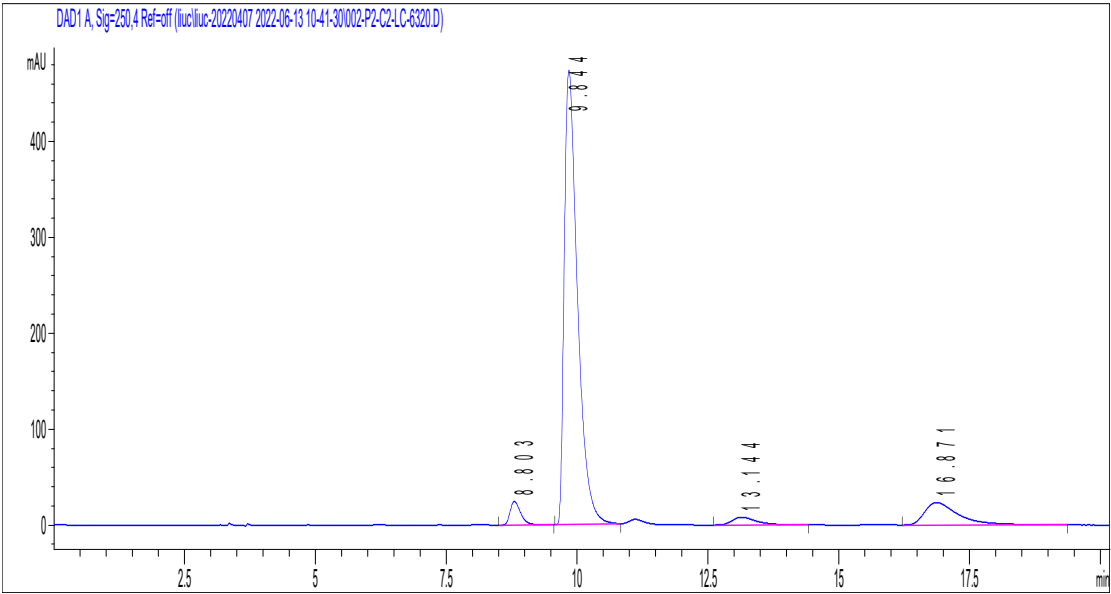



| # | Time   | Area   | Height | Width  | Area%  | Symmetry |
|---|--------|--------|--------|--------|--------|----------|
| 1 | 8.803  | 346.9  | 24.6   | 0.2163 | 3.470  | 0.642    |
| 2 | 9.844  | 8330.1 | 473.8  | 0.2651 | 83.311 | 0.492    |
| 3 | 13.144 | 262.8  | 8.1    | 0.4828 | 2.628  | 0.584    |
| 4 | 16.871 | 1059   | 23.3   | 0.6712 | 10.591 | 0.498    |

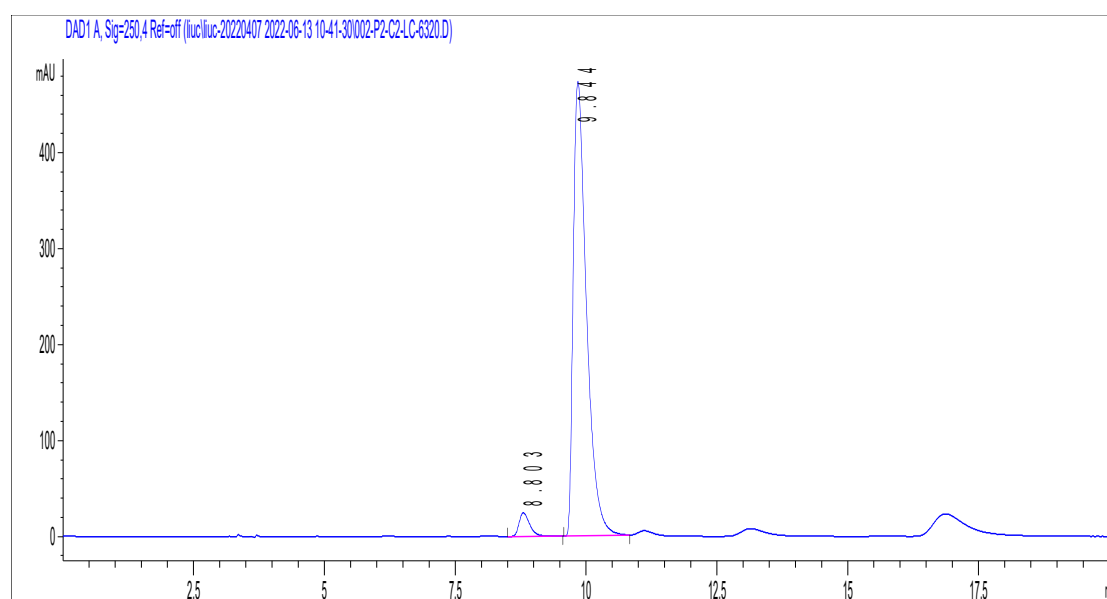

| # | Time  | Area   | Height | Width  | Area%  | Symmetry |
|---|-------|--------|--------|--------|--------|----------|
| 1 | 8.803 | 346.9  | 24.6   | 0.2163 | 3.998  | 0.642    |
| 2 | 9.844 | 8330.1 | 473.8  | 0.2651 | 96.002 | 0.492    |
